# Supplementary material for: Shot-Gun Proteomic Analysis on Roots of Arabidopsis <em>pld&alpha;1</em> Mutants Suggesting New Roles of PLD&alpha;1 in Mitochondrial Protein Import, Vesicular Trafficking and Glucosinolate Biosynthesis
Source: Preprints.org preprint supplement (doi:10.20944/preprints201811.0485.v1), 2018-11-20
Supplement: Supplementary file 1 [file supplementary]

## Sheet: Col-0_1
Accession	Coverage	# Peptides	# AAs	MW [kDa]	calc. pI	Score	Description
O50008	52.94	80	765	84.3035	6.50732	658.329	5-methyltetrahydropteroyltriglutamate--homocysteine methyltransferase 1 OS=Arabidopsis thaliana GN=MS1 PE=1 SV=1 - [METE1_ARATH]
	Sequence	Protein Accessions	# Proteins	# Protein Groups	Activation Type	Modifications	Probability	XCorr	Δ Score	Rank	Intensity	Charge	m/z [Da]	MH+ [Da]	ΔM [ppm]	RT [min]	First Scan	Last Scan	MS Order	Ions Matched	Spectrum File	Annotation
	NIWANDFAASLSTLQALEGIVGK	O50008	1	1	CID		91.9954	6.40104	1	1	56570	2	1210.27	2419.53	521.368	107.442	39140	39140	MS2	26/66	R_Col_0_1.raw
	LVVSTScSLLHTAVDLINETKLDDEIKSWLAFAAQK	O50008	1	1	CID	C7(Carbamidomethyl)	300	6.19351	1	1	147262	3	1339.6	4016.8	171.951	103.285	37695	37695	MS2	41/210	R_Col_0_1.raw
	HETcYQIALAIKDEVEDLEK	Q9SRV5;O50008	2	2	CID	C4(Carbamidomethyl)	71.5235	6.01602	1	1	2438767	3	802.176	2404.51	143.239	76.3335	27171	27171	MS2	37/114	R_Col_0_1.raw
	ALAGQKDEALFSANAAALASR	O50008	1	1	CID		107.84	5.99279	1	1	2.88105e+06	2	1037.93	2074.85	-112.543	48.8821	16421	16421	MS2	27/60	R_Col_0_1.raw
	ALGVDTVPVLVGPVSYLLLSK	O50008	1	1	CID		61.8662	5.93719	1	1	4.01181e+06	3	714.508	2141.51	582.125	99.9382	36386	36386	MS2	41/120	R_Col_0_1.raw
	ALAGQKDEALFSANAAALASR	O50008	1	1	CID		66.3203	5.75338	1	1	1.2816e+06	2	1038.51	2076.02	449.504	48.7648	16375	16375	MS2	23/60	R_Col_0_1.raw
	ALAGQKDEALFSANAAALASR	O50008	1	1	CID		113.929	5.60971	1	1	3.41594e+06	2	1038.51	2076.02	449.504	50.2511	16959	16959	MS2	25/60	R_Col_0_1.raw
	MLAVLEQNILWVNPDcGLK	Q9SRV5;O50008	2	2	CID	C16(Carbamidomethyl)	30.7305	5.53837	1	1	3.43939e+06	3	738.425	2213.26	51.9869	88.1467	31778	31778	MS2	34/108	R_Col_0_1.raw
	NIWANDFAASLSTLQALEGIVGK	O50008	1	1	CID		109.147	5.52209	1	1	91024.3	3	807.176	2419.51	515.973	106.618	38870	38870	MS2	38/132	R_Col_0_1.raw
	AAGATWIQLDEPVLVMDLEGQK	O50008	1	1	CID		80.1019	5.34848	1	1	2.55369e+06	2	1192.52	2384.03	-79.4928	91.7472	33182	33182	MS2	21/63	R_Col_0_1.raw
	AAGATWIQLDEPVLVMDLEGQK	O50008	1	1	CID		63.6357	5.24635	1	1	1.73517e+06	2	1192.52	2384.03	-79.4928	90.3683	32643	32643	MS2	23/63	R_Col_0_1.raw
	GMLTGPVTILNWSFVR	Q9SRV5;O50008	3	2	CID		82.9598	5.16562	1	1	9293849	2	896.012	1791.02	29.8699	92.7167	33560	33560	MS2	28/45	R_Col_0_1.raw
	LVVSTScSLLHTAVDLINETKLDDEIK	O50008	1	1	CID	C7(Carbamidomethyl)	97.6947	5.13487	1	1	1.73738e+06	3	1005.43	3014.28	232.246	87.2683	31436	31436	MS2	37/156	R_Col_0_1.raw
	GMLTGPVTILNWSFVR	Q9SRV5;O50008	3	2	CID		65.4817	4.93762	1	1	2.86335e+06	2	896.012	1791.02	29.8699	91.3319	33020	33020	MS2	23/45	R_Col_0_1.raw
	AAGATWIQLDEPVLVMDLEGQK	O50008	1	1	CID		62.1355	4.86707	1	1	697897	2	1192.68	2384.36	60.3209	90.1921	32575	32575	MS2	19/63	R_Col_0_1.raw
	LNLPILPTTTIGSFPQTVELR	Q9SRV5;O50008	2	2	CID		97.0914	4.84818	1	1	2.41432e+06	2	1156.1	2311.19	383.198	90.5495	32714	32714	MS2	23/60	R_Col_0_1.raw
	WFDTNYHYIVPELGPEVNFSYASHK	O50008	1	1	CID		117.428	4.82982	1	1	2.32077e+06	3	1005.18	3013.53	36.7519	75.6912	26922	26922	MS2	39/144	R_Col_0_1.raw
	LVVSTScSLLHTAVDLINETK	Q9SRV5;O50008	2	2	CID	C7(Carbamidomethyl)	24.312	4.74297	1	1	4.64315e+06	3	767.759	2301.26	454.478	82.6087	29618	29618	MS2	39/120	R_Col_0_1.raw
	MLAVLEQNILWVNPDcGLK	Q9SRV5;O50008	2	2	CID	C16(Carbamidomethyl)	62.9312	4.52113	1	1	994506	2	1107.6	2214.19	471.868	89.8752	32452	32452	MS2	20/54	R_Col_0_1.raw
	cVKPPVIYGDVSRPK	O50008	1	1	CID	C1(Carbamidomethyl)	29.6729	4.50239	1	1	12992083	3	572.672	1716	623.719	25.3289	7094	7094	MS2	34/84	R_Col_0_1.raw
	ALAGQKDEALFSANAAALASR	O50008	1	1	CID		87.6454	4.43353	1	1	2.66052e+06	2	1038.43	2075.85	369.25	50.4333	17031	17031	MS2	25/60	R_Col_0_1.raw
	GGIGVIQIDEAALR	Q9SRV5;O50008	2	2	CID		71.4615	4.43164	1	1	1.56294e+06	2	705.925	1410.84	-672.423	61.2476	21293	21293	MS2	24/39	R_Col_0_1.raw
	AAGATWIQLDEPVLVMDLEGQK	O50008	1	1	CID		47.5616	4.37319	1	1	870843	2	1193.35	2385.69	619.185	90.025	32511	32511	MS2	20/63	R_Col_0_1.raw
	GGIGVIQIDEAALR	Q9SRV5;O50008	2	2	CID		44.2245	4.33614	1	1	4162294	2	706.508	1412.01	154.395	62.6136	21830	21830	MS2	24/39	R_Col_0_1.raw
	AMTVFWSAMAQSMTSRPMK	O50008	1	1	CID		100.483	4.27514	1	1	1.56538e+06	2	1081.1	2161.19	84.8393	71.5506	25304	25304	MS2	21/54	R_Col_0_1.raw
	LDDEIKSWLAFAAQK	O50008	1	1	CID		54.5201	4.22519	1	1	1.72294e+06	2	868.511	1736.01	638.539	75.5515	26867	26867	MS2	19/42	R_Col_0_1.raw
	ALGVDTVPVLVGPVSYLLLSK	O50008	1	1	CID		20.6694	4.21071	1	1	599860	2	1071.18	2141.36	510.432	102.148	37254	37254	MS2	22/60	R_Col_0_1.raw
	YGYTGGEIGLDVYFSMAR	O50008	1	1	CID		63.0232	4.18935	1	1	21309.3	2	1000.35	1999.69	379.97	126.866	45383	45383	MS2	21/51	R_Col_0_1.raw
	MLAVLEQNILWVNPDcGLK	Q9SRV5;O50008	2	2	CID	C16(Carbamidomethyl)	74.694	4.17377	1	1	4.39922e+06	2	1107.1	2213.19	20.2357	88.4684	31904	31904	MS2	27/54	R_Col_0_1.raw
	KLNLPILPTTTIGSFPQTVELR	Q9SRV5;O50008	2	2	CID		48.202	4.17277	1	1	1.37957e+06	2	1219.68	2438.36	-16.486	80.8802	28945	28945	MS2	23/63	R_Col_0_1.raw
	YGAGIGPGVYDIHSPR	Q9SRV5;O50008	3	2	CID		17.9982	4.10891	1	1	12875994	2	830.427	1659.85	613.3	38.3162	12242	12242	MS2	24/45	R_Col_0_1.raw
	ALGVDTVPVLVGPVSYLLLSK	O50008	1	1	CID		34.1835	4.03049	1	1	13839740	2	1071.18	2141.36	510.432	100.761	36710	36710	MS2	22/60	R_Col_0_1.raw
	HETcYQIALAIKDEVEDLEKGGIGVIQIDEAALR	Q9SRV5;O50008	2	2	CID	C4(Carbamidomethyl)	1	4.00974	1	1	986176	3	1266.19	3796.54	-105.69	96.5545	35061	35061	MS2	31/198	R_Col_0_1.raw
	GMLTGPVTILNWSFVR	Q9SRV5;O50008	3	2	CID		63.0233	3.988	1	1	748339	2	896.512	1792.02	587.895	94.1161	34107	34107	MS2	18/45	R_Col_0_1.raw
	MLAVLEQNILWVNPDcGLK	Q9SRV5;O50008	2	2	CID	C16(Carbamidomethyl)	9.38809	3.98014	1	1	35819.6	2	1107.77	2214.52	622.321	122.255	43900	43900	MS2	17/54	R_Col_0_1.raw
	LNLPILPTTTIGSFPQTVELR	Q9SRV5;O50008	2	2	CID		24.0773	3.97917	1	1	3.40042e+06	3	771.092	2311.26	413.592	90.229	32589	32589	MS2	31/120	R_Col_0_1.raw
	AAGATWIQLDEPVLVMDLEGQK	O50008	1	1	CID		31.9595	3.96472	1	1	2.86522e+06	3	795.426	2384.26	19.8938	91.7015	33164	33164	MS2	32/126	R_Col_0_1.raw
	KSEHAFYLDWAVHSFR	O50008	1	1	CID		67.7097	3.93324	0.208371	1	1.19709e+06	2	996.513	1992.02	-477.859	53.107	18088	18088	MS2	18/45	R_Col_0_1.raw
	FIPSNTFAHYDQVLDTTAMLGAVPPR	O50008	1	1	CID		65.6334	3.91682	1	1	1.18706e+06	2	1431.27	2861.54	37.4913	80.286	28714	28714	MS2	23/75	R_Col_0_1.raw
	DKLVVSTScSLLHTAVDLINETK	Q9SRV5;O50008	2	2	CID	C9(Carbamidomethyl)	38.86	3.83211	1	1	1.31451e+06	3	848.594	2543.77	168.507	82.6732	29644	29644	MS2	35/132	R_Col_0_1.raw
	FIPSNTFAHYDQVLDTTAMLGAVPPR	O50008	1	1	CID		22.1943	3.82759	1	1	14978208	3	954.846	2862.52	382.265	80.3941	28755	28755	MS2	30/150	R_Col_0_1.raw
	YGYTGGEIGLDVYFSMAR	O50008	1	1	CID		54.1588	3.77496	1	1	11705.2	2	1000.18	1999.35	213.309	132.428	47190	47190	MS2	19/51	R_Col_0_1.raw
	GGIGVIQIDEAALR	Q9SRV5;O50008	2	2	CID		6.3198	3.76211	1	1	1.5721e+06	2	706.925	1412.84	744.143	60.8472	21136	21136	MS2	18/39	R_Col_0_1.raw
	YGAGIGPGVYDIHSPR	Q9SRV5;O50008	3	2	CID		10.1701	3.71993	1	1	17370234	2	829.927	1658.85	10.8295	38.4062	12278	12278	MS2	20/45	R_Col_0_1.raw
	GmLTGPVTILNWSFVR	Q9SRV5;O50008	3	2	CID	M2(Oxidation)	63.6762	3.71418	1	1	1.70946e+06	2	904.512	1808.02	585.676	86.808	31257	31257	MS2	16/45	R_Col_0_1.raw
	KLNLPILPTTTIGSFPQTVELR	Q9SRV5;O50008	2	2	CID		18.5698	3.69149	1	1	8930620	3	813.927	2439.77	558.839	80.7154	28880	28880	MS2	32/126	R_Col_0_1.raw
	cVKPPVIYGDVSRPK	O50008	1	1	CID	C1(Carbamidomethyl)	27.9756	3.67667	1	1	14733019	3	572.339	1715	40.9817	25.7868	7276	7276	MS2	33/84	R_Col_0_1.raw
	SEHAFYLDWAVHSFR	O50008	1	1	CID		23.3265	3.65954	1	1	1.89892e+06	3	622.506	1865.5	336.402	62.2597	21690	21690	MS2	33/84	R_Col_0_1.raw
	HETcYQIALAIKDEVEDLEK	Q9SRV5;O50008	2	2	CID	C4(Carbamidomethyl)	34.3001	3.56787	1	1	691597	2	1202.52	2404.03	-59.2881	76.368	27186	27186	MS2	19/57	R_Col_0_1.raw
	IPSSEEIADRVNK	O50008	1	1	CID		33.7487	3.5496	1	1	3.91688e+06	2	729.425	1457.84	57.0341	24.5674	6790	6790	MS2	20/36	R_Col_0_1.raw
	LNLPILPTTTIGSFPQTVELR	Q9SRV5;O50008	2	2	CID		41.2041	3.54371	1	1	926417	2	1155.18	2309.36	-410.384	90.9804	32883	32883	MS2	16/60	R_Col_0_1.raw
	FALESFWDGK	Q9SRV5;O50008	3	2	CID		33.6962	3.49658	1	1	17568216	2	600.339	1199.67	81.5196	70.7536	24992	24992	MS2	21/27	R_Col_0_1.raw
	YGYTGGEIGLDVYFSMAR	O50008	1	1	CID		47.1853	3.49234	1	1	47790.9	2	1000.51	2000.02	546.574	129.862	46359	46359	MS2	22/51	R_Col_0_1.raw
	FALESFWDGK	Q9SRV5;O50008	3	2	CID		34.246	3.47856	1	1	12470887	2	600.839	1200.67	914.335	70.7082	24974	24974	MS2	22/27	R_Col_0_1.raw
	DEALFSANAAALASR	O50008	1	1	CID		23.6879	3.46413	1	1	1.6138e+06	2	754.425	1507.84	722.126	57.666	19887	19887	MS2	18/42	R_Col_0_1.raw
	HETcYQIALAIKDEVEDLEK	Q9SRV5;O50008	2	2	CID	C4(Carbamidomethyl)	54.517	3.44656	1	1	506183	2	1202.52	2404.03	-59.2881	74.7895	26568	26568	MS2	21/57	R_Col_0_1.raw
	YLFAGVVDGR	Q9SRV5;O50008	2	2	CID		41.0951	3.44142	1	1	20895540	2	548.838	1096.67	82.4264	50.385	17012	17012	MS2	19/27	R_Col_0_1.raw
	SFELLSLLPK	O50008	1	1	CID		20.1462	3.42816	1	1	8908772	2	573.922	1146.84	139.263	84.7757	30464	30464	MS2	18/27	R_Col_0_1.raw
	WFDTNYHYIVPELGPEVNFSYASHK	O50008	1	1	CID		54.1337	3.36312	1	1	741493	2	1507.61	3014.21	262.256	75.5791	26879	26879	MS2	24/72	R_Col_0_1.raw
	LVVSTScSLLHTAVDLINETK	Q9SRV5;O50008	2	2	CID	C7(Carbamidomethyl)	18.7805	3.36027	1	1	936861	2	1150.6	2300.19	-10.6173	83.1807	29842	29842	MS2	15/60	R_Col_0_1.raw
	SEHAFYLDWAVHSFR	O50008	1	1	CID		57.5588	3.359	0.0181686	1	1.14624e+06	2	932.929	1864.85	-13.975	62.9929	21979	21979	MS2	19/42	R_Col_0_1.raw
	KLNLPILPTTTIGSFPQTVELR	Q9SRV5;O50008	2	2	CID		9.58275	3.34367	1	1	934672	2	1220.18	2439.36	393.472	79.6734	28474	28474	MS2	20/63	R_Col_0_1.raw
	KSEHAFYLDWAVHSFR	O50008	1	1	CID		11.5707	3.31811		2	970534	2	997.347	1993.69	358.529	52.008	17653	17653	MS2	16/45	R_Col_0_1.raw
	YGYTGGEIGLDVYFSMAR	O50008	1	1	CID		43.9563	3.31459	1	1	22373	2	1000.26	1999.52	296.646	114.814	41513	41513	MS2	19/51	R_Col_0_1.raw
	NIWANDFAASLSTLQALEGIVGK	O50008	1	1	CID		42.3679	3.30816	1	1	40561.9	2	1210.18	2419.36	452.514	109.743	39878	39878	MS2	18/66	R_Col_0_1.raw
	AAGATWIQLDEPVLVMDLEGQK	O50008	1	1	CID		1.59845	3.30335	1	1	1.40807e+06	2	1193.18	2385.36	479.528	93.699	33944	33944	MS2	16/63	R_Col_0_1.raw
	AAGATWIQLDEPVLVMDLEGQK	O50008	1	1	CID		12.3884	3.29207	1	1	19390.2	2	1192.85	2384.69	200.096	133.776	47630	47630	MS2	16/63	R_Col_0_1.raw
	GmLTGPVTILNWSFVR	Q9SRV5;O50008	3	2	CID	M2(Oxidation)	56.0042	3.27269	1	1	1.00303e+06	2	904.512	1808.02	585.676	92.9127	33637	33637	MS2	15/45	R_Col_0_1.raw
	SFELLSLLPK	O50008	1	1	CID		27.523	3.27068	1	1	972290	2	573.839	1146.67	-6.06839	83.411	29932	29932	MS2	19/27	R_Col_0_1.raw
	GGIGVIQIDEAALR	Q9SRV5;O50008	2	2	CID		16.8165	3.27005	1	1	11463.6	2	706.341	1411.68	-81.6993	123.038	44156	44156	MS2	18/39	R_Col_0_1.raw
	MLAVLEQNILWVNPDcGLK	Q9SRV5;O50008	2	2	CID	C16(Carbamidomethyl)	18.4443	3.26322	1	1	1.10185e+06	2	1107.68	2214.36	547.1	92.3127	33403	33403	MS2	14/54	R_Col_0_1.raw
	DKLVVSTScSLLHTAVDLINETK	Q9SRV5;O50008	2	2	CID	C9(Carbamidomethyl)	19.3155	3.25793	1	1	1.32108e+06	2	1272.85	2544.7	533.811	83.6499	30026	30026	MS2	16/66	R_Col_0_1.raw
	cVKPPVIYGDVSRPK	O50008	1	1	CID	C1(Carbamidomethyl)	27.3093	3.23551	1	1	1.24828e+06	2	857.427	1713.85	-632.113	25.863	7308	7308	MS2	20/42	R_Col_0_1.raw
	ALAGQKDEALFSANAAALASR	O50008	1	1	CID		5.57144	3.17533	1	1	17855.1	2	1037.93	2074.85	-112.543	132.273	47140	47140	MS2	13/60	R_Col_0_1.raw
	GVTAFGFDLVR	Q9SRV5;O50008	2	2	CID		36.1111	3.15558	1	1	526167	2	591.256	1181.5	-107.838	67.1289	23580	23580	MS2	21/30	R_Col_0_1.raw
	MLAVLEQNILWVNPDcGLK	Q9SRV5;O50008	2	2	CID	C16(Carbamidomethyl)	35.1441	3.12605	1	1	32532.2	2	1107.35	2213.69	246.103	126.148	45155	45155	MS2	15/54	R_Col_0_1.raw
	GGIGVIQIDEAALR	Q9SRV5;O50008	2	2	CID		17.1216	3.12245	1	1	21348.9	2	706.841	1412.68	626.249	118.676	42748	42748	MS2	14/39	R_Col_0_1.raw
	YGYTGGEIGLDVYFSMAR	O50008	1	1	CID		10.2351	3.11731	1	1	15040.9	2	1000.51	2000.02	546.574	123.138	44188	44188	MS2	16/51	R_Col_0_1.raw
	GGIGVIQIDEAALR	Q9SRV5;O50008	2	2	CID		7.35325	2.89225	1	1	756197	1	1411.85	1411.85	45.6115	61.3153	21320	21320	MS2	17/39	R_Col_0_1.raw
	YLFAGVVDGR	Q9SRV5;O50008	2	2	CID		1	2.67966	1	1	8088641	1	1097.6	1097.6	929.428	49.981	16854	16854	MS2	15/27	R_Col_0_1.raw
P25858	60.65	75	338	36.8911	7.12256	570.836	Glyceraldehyde-3-phosphate dehydrogenase GAPC1, cytosolic OS=Arabidopsis thaliana GN=GAPC1 PE=1 SV=2 - [G3PC1_ARATH]
	Sequence	Protein Accessions	# Proteins	# Protein Groups	Activation Type	Modifications	Probability	XCorr	Δ Score	Rank	Intensity	Charge	m/z [Da]	MH+ [Da]	ΔM [ppm]	RT [min]	First Scan	Last Scan	MS Order	Ions Matched	Spectrum File	Annotation
	DAPMFVVGVNEHEYKSDLDIVSNAScTTNcLAPLAK	P25858	2	1	CID	C26(Carbamidomethyl) C30(Carbamidomethyl)	110.596	7.82722	1	1	905376	3	1322.35	3965.04	-208.626	76.9885	27429	27429	MS2	49/210	R_Col_0_1.raw
	FGIVEGLMTTVHSITATQK	P25858	2	1	CID		96.8052	5.88697	1	1	3.42583e+06	2	1017.01	2033.02	-26.1787	82.4238	29546	29546	MS2	27/54	R_Col_0_1.raw
	GILGYTEDDVVSTDFVGDNR	P25858	2	1	CID		105.166	5.84122	1	1	9923459	2	1087.02	2173.02	466.602	71.0758	25118	25118	MS2	28/57	R_Col_0_1.raw
	GILGYTEDDVVSTDFVGDNR	P25858	2	1	CID		56.5267	5.65322	1	1	16211.1	2	1086.68	2172.36	159.852	123.895	44429	44429	MS2	25/57	R_Col_0_1.raw
	GILGYTEDDVVSTDFVGDNR	P25858	2	1	CID		102.17	5.38684	1	1	1576666	2	1086.52	2172.02	6.4072	72.2823	25590	25590	MS2	30/57	R_Col_0_1.raw
	GILGYTEDDVVSTDFVGDNR	P25858	2	1	CID		80.1494	5.29167	1	1	910329	2	1087.1	2173.19	543.259	73.685	26137	26137	MS2	26/57	R_Col_0_1.raw
	SDLDIVSNAScTTNcLAPLAK	P25858	2	1	CID	C11(Carbamidomethyl) C15(Carbamidomethyl)	53.349	4.86283	1	1	4730670	2	1126.02	2251.02	422.26	64.2705	22478	22478	MS2	24/60	R_Col_0_1.raw
	GILGYTEDDVVSTDFVGDNR	P25858	2	1	CID		78.7699	4.84439	1	1	12000.4	2	1087.1	2173.19	543.259	121.718	43727	43727	MS2	25/57	R_Col_0_1.raw
	VPTVDVSVVDLTVR	P25858	2	1	CID		61.6308	4.73984	1	1	3.79205e+06	2	750.592	1500.18	886.035	69.9204	24668	24668	MS2	21/39	R_Col_0_1.raw
	VPTVDVSVVDLTVR	P25858	2	1	CID		72.2318	4.73946	1	1	29956.9	2	750.009	1499.01	108.418	66.9526	23516	23516	MS2	25/39	R_Col_0_1.raw
	VPTVDVSVVDLTVR	P25858	2	1	CID		78.7033	4.73469	1	1	12200009	2	750.509	1500.01	775.021	68.5411	24128	24128	MS2	22/39	R_Col_0_1.raw
	FGIVEGLmTTVHSITATQK	P25858	2	1	CID	M8(Oxidation)	87.8389	4.73239	1	1	2.4283e+06	2	1025.51	2050.02	464.479	81.7335	29277	29277	MS2	25/54	R_Col_0_1.raw
	DDVELVAVNDPFITTEYMTYMFK	P25858	2	1	CID		58.8749	4.57538	1	1	349137	3	914.345	2741.02	-91.757	103.204	37664	37664	MS2	37/132	R_Col_0_1.raw
	SDLDIVSNAScTTNcLAPLAK	P25858	2	1	CID	C11(Carbamidomethyl) C15(Carbamidomethyl)	58.766	4.5351	1	1	1782623	2	1125.6	2250.19	52.0699	62.9009	21942	21942	MS2	24/60	R_Col_0_1.raw
	GILGYTEDDVVSTDFVGDNR	P25858	2	1	CID		42.6138	4.52622	1	1	19164.2	2	1086.6	2172.19	83.1357	127.448	45574	45574	MS2	22/57	R_Col_0_1.raw
	VPTVDVSVVDLTVR	P25858	2	1	CID		34.8983	4.52213	1	1	2531053	2	750.425	1499.84	663.982	73.9791	26252	26252	MS2	22/39	R_Col_0_1.raw
	GILGYTEDDVVSTDFVGDNR	P25858	2	1	CID		44.2383	4.43877	1	1	28583.2	2	1087.02	2173.02	466.602	110.807	40220	40220	MS2	22/57	R_Col_0_1.raw
	GILGYTEDDVVSTDFVGDNR	P25858	2	1	CID		57.7792	4.4364	1	1	19704	2	1086.93	2172.86	389.932	117.947	42516	42516	MS2	21/57	R_Col_0_1.raw
	VPTVDVSVVDLTVR	P25858	2	1	CID		68.0071	4.42835	1	1	3.97473e+06	2	750.009	1499.01	108.418	69.9227	24669	24669	MS2	23/39	R_Col_0_1.raw
	FGIVEGLmTTVHSITATQK	P25858	2	1	CID	M8(Oxidation)	45.1314	4.41032	1	1	1.24115e+06	2	1024.93	2048.85	-104.691	82.2845	29492	29492	MS2	16/54	R_Col_0_1.raw
	FGIVEGLMTTVHSITATQK	P25858	2	1	CID		113.869	4.39383	1	1	662640	2	1016.43	2031.85	-600.393	81.0293	29004	29004	MS2	24/54	R_Col_0_1.raw
	GILGYTEDDVVSTDFVGDNR	P25858	2	1	CID		97.8423	4.31944	1	1	1.0106e+06	2	1086.02	2171.02	-454.211	73.8193	26190	26190	MS2	26/57	R_Col_0_1.raw
	GILGYTEDDVVSTDFVGDNR	P25858	2	1	CID		69.0431	4.21634	1	1	0	2	1086.73	2172.46	206.036	75.5815	26880	26880	MS2	21/57	R_Col_0_1.raw
	VPTVDVSVVDLTVR	P25858	2	1	CID		44.4516	4.20653	1	1	11545.7	2	750.509	1500.01	775.021	116.381	42015	42015	MS2	20/39	R_Col_0_1.raw
	GILGYTEDDVVSTDFVGDNR	P25858	2	1	CID		79.3108	4.12639	1	1	51187.9	2	1087.18	2173.36	619.906	107.514	39164	39164	MS2	20/57	R_Col_0_1.raw
	GILGYTEDDVVSTDFVGDNR	P25858	2	1	CID		58.3307	4.11291	1	1	54667	2	1086.85	2172.69	313.25	105.075	38345	38345	MS2	19/57	R_Col_0_1.raw
	VPTVDVSVVDLTVR	P25858	2	1	CID		36.2737	4.102	1	1	18578.6	2	750.092	1499.18	219.58	111.901	40572	40572	MS2	18/39	R_Col_0_1.raw
	TLLFGEKPVTVFGIR	P25858	2	1	CID		95.4695	4.09735	1	1	94537.7	2	839.51	1678.01	619.841	66.5966	23389	23389	MS2	25/42	R_Col_0_1.raw
	GILGYTEDDVVSTDFVGDNR	P25858	2	1	CID		103.245	4.06494	1	1	19448	2	1086.52	2172.02	6.4072	129.444	46223	46223	MS2	21/57	R_Col_0_1.raw
	FGIVEGLMTTVHSITATQK	P25858	2	1	CID		63.8559	4.03419	1	1	6.69721e+06	3	678.841	2034.51	704.715	82.747	29672	29672	MS2	34/108	R_Col_0_1.raw
	VPTVDVSVVDLTVR	P25858	2	1	CID		64.1685	4.02972	1	1	21370.1	2	750.342	1499.68	552.919	122.627	44022	44022	MS2	19/39	R_Col_0_1.raw
	LVSWYDNEWGYSSR	P25858	2	1	CID		59.0793	3.96948	1	1	1.59392e+06	2	881.845	1762.68	507.821	62.6588	21848	21848	MS2	20/39	R_Col_0_1.raw
	VPTVDVSVVDLTVR	P25858	2	1	CID		13.509	3.96422	0.222684	1	15012.5	2	750.509	1500.01	775.021	132.896	47344	47344	MS2	18/39	R_Col_0_1.raw
	GILGYTEDDVVSTDFVGDNR	P25858	2	1	CID		49.4997	3.89857	1	1	3.86488e+06	3	725.008	2173.01	460.594	70.9365	25064	25064	MS2	29/114	R_Col_0_1.raw
	VPTVDVSVVDLTVR	P25858	2	1	CID		35.8974	3.84414	1	1	19521.7	2	750.509	1500.01	775.021	128.584	45940	45940	MS2	19/39	R_Col_0_1.raw
	DAPMFVVGVNEHEYK	P25858	2	1	CID		109.681	3.82837	1	1	873885	2	867.261	1733.51	-750.495	46.8486	15618	15618	MS2	23/42	R_Col_0_1.raw
	VPTVDVSVVDLTVR	P25858	2	1	CID		30.0607	3.81989	0.144518	1	42974.9	2	750.592	1500.18	886.035	106.323	38772	38772	MS2	19/39	R_Col_0_1.raw
	VPTVDVSVVDLTVR	P25858	2	1	CID		72.1611	3.7911	1	1	2283342	2	750.009	1499.01	108.418	71.4463	25263	25263	MS2	20/39	R_Col_0_1.raw
	VVDLIVHMSKA	P25858	2	1	CID		31.9931	3.78589	1	1	5.35684e+06	2	606.839	1212.67	815.999	38.1353	12171	12171	MS2	19/30	R_Col_0_1.raw
	GILGYTEDDVVSTDFVGDNR	P25858	2	1	CID		49.0476	3.78215	1	1	725103	2	1086.68	2172.36	159.852	77.0716	27461	27461	MS2	17/57	R_Col_0_1.raw
	VPTVDVSVVDLTVR	P25858	2	1	CID		34.5791	3.76362	1	1	11912	2	750.259	1499.51	441.83	118.667	42745	42745	MS2	19/39	R_Col_0_1.raw
	TLLFGEKPVTVFGIR	P25858	2	1	CID		36.5097	3.75871	1	1	8922579	3	559.755	1677.25	165.168	67.8994	23876	23876	MS2	29/84	R_Col_0_1.raw
	VPTVDVSVVDLTVR	P25858	2	1	CID		24.9527	3.72377	1	1	671656	2	750.425	1499.84	663.982	99.8819	36365	36365	MS2	16/39	R_Col_0_1.raw
	VPTVDVSVVDLTVR	P25858	2	1	CID		48.7384	3.70138	0.121789	1	1.02985e+06	2	750.509	1500.01	775.021	78.8792	28165	28165	MS2	15/39	R_Col_0_1.raw
	TLLFGEKPVTVFGIR	P25858	2	1	CID		100.213	3.6867	1	1	554906	2	838.427	1675.85	-672.261	67.1151	23574	23574	MS2	23/42	R_Col_0_1.raw
	GILGYTEDDVVSTDFVGDNR	P25858	2	1	CID		53.4275	3.68419	1	1	10842.8	2	1086.02	2171.02	-454.211	124.825	44729	44729	MS2	22/57	R_Col_0_1.raw
	VPTVDVSVVDLTVR	P25858	2	1	CID		17.8376	3.6531	0.123751	1	18900.9	2	750.509	1500.01	775.021	120.857	43450	43450	MS2	17/39	R_Col_0_1.raw
	VVDLIVHMSK	P25858	2	1	CID		38.103	3.5939	1	1	10389804	2	571.339	1141.67	898.057	35.5542	11144	11144	MS2	22/27	R_Col_0_1.raw
	TLLFGEKPVTVFGIR	P25858	2	1	CID		11.0055	3.58377	1	1	2.85848e+06	2	839.01	1677.01	23.9011	68.6777	24183	24183	MS2	15/42	R_Col_0_1.raw
	VPTVDVSVVDLTVR	P25858	2	1	CID		24.4497	3.57818	0.02836	1	14888.7	2	750.425	1499.84	663.982	124.431	44602	44602	MS2	18/39	R_Col_0_1.raw
	VPTVDVSVVDLTVR	P25858	2	1	CID		42.1095	3.54517	1	1	13730.1	2	750.009	1499.01	108.418	131.182	46788	46788	MS2	20/39	R_Col_0_1.raw
	VVDLIVHMSK	P25858	2	1	CID		40.2316	3.53013	1	1	13696536	2	570.839	1140.67	22.1497	35.5979	11162	11162	MS2	19/27	R_Col_0_1.raw
	DDVELVAVNDPFITTEYmTYMFK	P25858	2	1	CID	M18(Oxidation)	10.2548	3.48793	0.065352	1	506694	2	1379.1	2757.2	-24.0765	102.578	37423	37423	MS2	19/66	R_Col_0_1.raw
	GILGYTEDDVVSTDFVGDNR	P25858	2	1	CID		52.0683	3.44257	1	1	12118.3	2	1086.35	2171.69	-147.085	119.306	42951	42951	MS2	21/57	R_Col_0_1.raw
	DAPMFVVGVNEHEYK	P25858	2	1	CID		33.8168	3.42312	1	1	2.63692e+06	2	868.428	1735.85	594.743	48.2403	16167	16167	MS2	22/42	R_Col_0_1.raw
	DDVELVAVNDPFITTEYMTYMFK	P25858	2	1	CID		59.5382	3.42159	1	1	183242	2	1371.19	2741.37	34.6148	103.396	37736	37736	MS2	24/66	R_Col_0_1.raw
	VPTVDVSVVDLTVR	P25858	2	1	CID		2.58757	3.40869	1	1	1.20826e+06	2	750.342	1499.68	552.919	82.8401	29709	29709	MS2	16/39	R_Col_0_1.raw
	VPTVDVSVVDLTVR	P25858	2	1	CID		57.0459	3.40837	1	1	2.75215e+06	2	750.592	1500.18	886.035	75.7794	26956	26956	MS2	14/39	R_Col_0_1.raw
	VPTVDVSVVDLTVR	P25858	2	1	CID		9.52257	3.38225	1	1	0	2	750.292	1499.58	486.202	90.1825	32571	32571	MS2	17/39	R_Col_0_1.raw
	VPTVDVSVVDLTVR	P25858	2	1	CID		50.8527	3.37121	1	1	1.30711e+06	2	749.592	1498.18	-447.764	70.0786	24731	24731	MS2	21/39	R_Col_0_1.raw
	VPTVDVSVVDLTVR	P25858	2	1	CID		32.7815	3.32062	0.0772733	1	517662	2	750.509	1500.01	775.021	102.591	37428	37428	MS2	15/39	R_Col_0_1.raw
	VPTVDVSVVDLTVR	P25858	2	1	CID		60.4903	3.29383	1	1	1.17393e+06	2	749.842	1498.68	-113.981	77.4876	27623	27623	MS2	17/39	R_Col_0_1.raw
	AASFNIIPSSTGAAK	P25858	2	1	CID		28.7415	3.29365	1	1	9729221	2	717.925	1434.84	58.1471	42.4497	13880	13880	MS2	20/42	R_Col_0_1.raw
	DDVELVAVNDPFITTEYMTYmFK	P25858	2	1	CID	M21(Oxidation)	2.42932	3.25999		2	506694	2	1379.1	2757.2	-24.0765	102.578	37423	37423	MS2	18/66	R_Col_0_1.raw
	VPTVDVSVVDLTVR	P25858	2	1	CID		33.4223	3.22649	1	1	1.06937e+06	2	750.342	1499.68	552.919	88.34	31854	31854	MS2	14/39	R_Col_0_1.raw
	GILGYTEDDVVSTDFVGDNR	P25858	2	1	CID		1	3.22633	1	1	970892	2	1087.18	2173.36	619.906	95.3288	34583	34583	MS2	17/57	R_Col_0_1.raw
	VPTVDVSVVDLTVR	P25858	2	1	CID		60.045	3.20249	1	1	88686	2	750.259	1499.51	441.83	104.149	38014	38014	MS2	16/39	R_Col_0_1.raw
	GILGYTEDDVVSTDFVGDNR	P25858	2	1	CID		61.5516	3.20093	1	1	30359.3	2	1086.52	2172.02	6.4072	108.331	39424	39424	MS2	16/57	R_Col_0_1.raw
	GILGYTEDDVVSTDFVGDNR	P25858	2	1	CID		1	3.19758	1	1	629903	2	1085.93	2170.86	-531.022	81.4821	29180	29180	MS2	18/57	R_Col_0_1.raw
	VPTVDVSVVDLTVR	P25858	2	1	CID		64.4935	3.19523	1	1	874113	2	749.842	1498.68	-113.981	79.1066	28253	28253	MS2	18/39	R_Col_0_1.raw
	VPTVDVSVVDLTVR	P25858	2	1	CID		45.654	3.16806	1	1	703698	2	749.759	1498.51	-225.217	86.9585	31316	31316	MS2	18/39	R_Col_0_1.raw
	AGIALSDKFVK	P25858	2	1	CID		7.00688	3.14088	1	1	4216335	2	575.422	1149.84	1016.89	30.999	9345	9345	MS2	18/30	R_Col_0_1.raw
	DDVELVAVNDPFITTEYMTYMFK	P25858	2	1	CID		22.6838	3.12947	1	1	910042	2	1371.69	2742.37	399.258	102.092	37232	37232	MS2	24/66	R_Col_0_1.raw
	NPEDIPWAEAGADYVVESTGVFTDKDK	P25858	1	1	CID		142.142	3.07018	1	1	753924	2	1477.11	2953.2	-57.2286	85.9893	30939	30939	MS2	22/78	R_Col_0_1.raw
	AGIALSDKFVK	P25858	2	1	CID		13.8131	3.06905	1	1	21537632	2	574.839	1148.67	2.23758	31.7287	9632	9632	MS2	18/30	R_Col_0_1.raw
Q9SR37	62.79	62	524	59.6827	6.91748	537.839	Beta-glucosidase 23 OS=Arabidopsis thaliana GN=BGLU23 PE=1 SV=1 - [BGL23_ARATH]
	Sequence	Protein Accessions	# Proteins	# Protein Groups	Activation Type	Modifications	Probability	XCorr	Δ Score	Rank	Intensity	Charge	m/z [Da]	MH+ [Da]	ΔM [ppm]	RT [min]	First Scan	Last Scan	MS Order	Ions Matched	Spectrum File	Annotation
	SGYEAYLVTHNLLISHAEAVEAYR	Q9SR37	1	1	CID		92.6675	5.79701	1	1	4.49593e+06	3	903.095	2707.27	339.146	68.1713	23984	23984	MS2	41/138	R_Col_0_1.raw
	SGYEAYLVTHNLLISHAEAVEAYRK	Q9SR37	1	1	CID		62.6055	5.64989	1	1	1209855	3	945.846	2835.52	379.355	61.2992	21313	21313	MS2	35/144	R_Col_0_1.raw
	IGIAHSPAWFEAHDLADSQDGASIDR	Q9SR37	1	1	CID		78.8184	5.43463	1	1	11017945	3	927.429	2780.27	346.97	54.3522	18578	18578	MS2	37/150	R_Col_0_1.raw
	SGYEAYLVTHNLLISHAEAVEAYR	Q9SR37	1	1	CID		72.5743	5.37389	1	1	1.45294e+06	3	902.678	2706.02	-122.639	68.511	24117	24117	MS2	38/138	R_Col_0_1.raw
	IGIAHSPAWFEAHDLADSQDGASIDR	Q9SR37	1	1	CID		116.813	5.32502	1	1	8017510	3	927.345	2780.02	257.072	52.8905	18002	18002	MS2	33/150	R_Col_0_1.raw
	HWITFNEPWVFSHAGYDVGK	Q9SR37	1	1	CID		107.426	5.28138	1	1	11019732	3	797.426	2390.26	53.9472	69.5027	24506	24506	MS2	37/114	R_Col_0_1.raw
	GVSQAGVQFYHDLIDELIK	Q9SR37	1	1	CID		106	5.24775		2	4.45084e+06	2	1067.1	2133.19	509.44	89.4843	32300	32300	MS2	28/54	R_Col_0_1.raw
	ALDFILGWHLDTTTFGDYPQIMK	Q9SR37	1	1	CID		78.1472	5.23212	1	1	483495	2	1342.02	2683.03	263.016	95.1936	34530	34530	MS2	25/66	R_Col_0_1.raw
	NGITPFVTVFHWDTPQDLEDEYGGFLSER	Q9SR37	1	1	CID		126.754	5.21675	1	1	1.62529e+06	3	1123.77	3369.28	-85.109	96.0785	34874	34874	MS2	43/168	R_Col_0_1.raw
	GVSQAGVQFYHDLIDELIK	Q9SR37	1	1	CID		95.4951	5.16156	0.0703272	1	10440240	2	1066.51	2132.02	-37.5029	90.4126	32660	32660	MS2	25/54	R_Col_0_1.raw
	NAQNYAIGSKPLTAALNVYSR	Q9SR37	1	1	CID		127.944	5.13778	1	1	1.13364e+06	2	1125.68	2250.36	-366.624	53.5217	18251	18251	MS2	27/60	R_Col_0_1.raw
	NGITPFVTVFHWDTPQDLEDEYGGFLSER	Q9SR37	1	1	CID		121.952	5.12373	1	1	3.24839e+06	3	1124.27	3370.78	359.938	97.4583	35415	35415	MS2	36/168	R_Col_0_1.raw
	EKGVSQAGVQFYHDLIDELIK	Q9SR37	1	1	CID		76.8799	5.02032		2	768342	2	1195.18	2389.36	50.5506	83.1382	29826	29826	MS2	22/60	R_Col_0_1.raw
	VKHWITFNEPWVFSHAGYDVGK	Q9SR37	1	1	CID		46.637	4.94632	1	1	758662	3	873.094	2617.27	-11.4819	61.6186	21439	21439	MS2	28/126	R_Col_0_1.raw
	EKGVSQAGVQFYHDLIDELIK	Q9SR37	1	1	CID		75.9554	4.94476		2	1.02227e+06	2	1195.68	2390.36	468.884	83.0972	29810	29810	MS2	24/60	R_Col_0_1.raw
	NAQNYAIGSKPLTAALNVYSR	Q9SR37	1	1	CID		132.565	4.92704	1	1	14931354	2	1126.52	2252.02	373.737	54.896	18794	18794	MS2	23/60	R_Col_0_1.raw
	YANPEIMIMENGYGEELGASDSVAVGTADHNR	Q9SR37	1	1	CID		71.5283	4.84465	1	1	1.16954e+06	3	1137.93	3411.78	368.589	71.2165	25173	25173	MS2	31/186	R_Col_0_1.raw
	NAQNYAIGSKPLTAALNVYSR	Q9SR37	1	1	CID		59.9141	4.75046	1	1	7511669	3	751.425	2252.26	478.9	53.5812	18272	18272	MS2	34/120	R_Col_0_1.raw
	cNNDNGDVAVDFFHR	Q9SR37	1	1	CID	C1(Carbamidomethyl)	60.968	4.74841	1	1	8.37366e+06	3	594.172	1780.5	422.398	45.6886	15158	15158	MS2	31/84	R_Col_0_1.raw
	IGIAHSPAWFEAHDLADSQDGASIDR	Q9SR37	1	1	CID		72.291	4.68119	1	1	1.15256e+06	2	1390.52	2780.03	261.769	53.0532	18067	18067	MS2	24/75	R_Col_0_1.raw
	EYADFVFQEYGGK	Q9SR37	1	1	CID		48.9682	4.61088	1	1	18149810	2	777.426	1553.84	739.471	61.2882	21308	21308	MS2	20/36	R_Col_0_1.raw
	NGITPFVTVFHWDTPQDLEDEYGGFLSER	Q9SR37	1	1	CID		141.484	4.59002	1	1	982093	3	1124.18	3370.53	285.791	102.6	37431	37431	MS2	40/168	R_Col_0_1.raw
	YANPEIMIMENGYGEELGASDSVAVGTADHNR	Q9SR37	1	1	CID		6.52651	4.54565	1	1	811656	3	1137.35	3410.03	-144.423	71.5181	25292	25292	MS2	32/186	R_Col_0_1.raw
	HWITFNEPWVFSHAGYDVGK	Q9SR37	1	1	CID		116.264	4.41811	1	1	1.70282e+06	2	1195.52	2390.03	-45.1865	69.0238	24319	24319	MS2	23/57	R_Col_0_1.raw
	ASTDFVGLNYYTSVFSNHLEKPDPSKPR	Q9SR37	1	1	CID		75.4158	4.30935	1	1	853007	3	1057.1	3169.28	-88.2329	64.6975	22646	22646	MS2	30/162	R_Col_0_1.raw
	YYKDFLSQGVRPSALK	Q9SR37	1	1	CID		60.6998	4.30451	1	1	3586395	2	937.012	1873.02	542.383	39.2699	12623	12623	MS2	19/45	R_Col_0_1.raw
	HWITFNEPWVFSHAGYDVGK	Q9SR37	1	1	CID		105.991	4.24288	1	1	2.51613e+06	2	1196.1	2391.19	442.746	68.9538	24290	24290	MS2	22/57	R_Col_0_1.raw
	NAQNYAIGSKPLTAALNVYSR	Q9SR37	1	1	CID		82.6718	4.22493	1	1	34602732	3	751.425	2252.26	478.9	55.264	18938	18938	MS2	31/120	R_Col_0_1.raw
	DFREYADFVFQEYGGK	Q9SR37	1	1	CID		52.106	4.21569	1	1	799823	2	986.68	1972.35	740.551	80.9119	28957	28957	MS2	21/45	R_Col_0_1.raw
	EKGVSQAGVQFYHDLIDELIK	Q9SR37	1	1	CID		16.1229	4.15804	1	1	818096	3	796.593	2387.76	-618.001	82.394	29535	29535	MS2	29/120	R_Col_0_1.raw
	DKYANPEIMIMENGYGEELGASDSVAVGTADHNR	Q9SR37	1	1	CID		63.1547	4.129	1	1	814361	3	1218.93	3654.79	312.009	68.0587	23941	23941	MS2	35/198	R_Col_0_1.raw
	cNNDNGDVAVDFFHR	Q9SR37	1	1	CID	C1(Carbamidomethyl)	27.8498	4.10634	1	1	6.68847e+06	2	890.428	1779.85	55.3197	45.4618	15069	15069	MS2	22/42	R_Col_0_1.raw
	DFREYADFVFQEYGGK	Q9SR37	1	1	CID		33.4992	4.04968	1	1	808545	2	986.097	1971.19	149.118	81.0425	29008	29008	MS2	22/45	R_Col_0_1.raw
	ALDFILGWHLDTTTFGDYPQIMK	Q9SR37	1	1	CID		41.1438	4.03682	1	1	2.10336e+06	3	894.845	2682.52	71.8022	96.0317	34856	34856	MS2	33/132	R_Col_0_1.raw
	NAQNYAIGSKPLTAALNVYSR	Q9SR37	1	1	CID		43.284	4.01491	1	1	893914	2	1126.6	2252.19	447.712	56.3492	19370	19370	MS2	21/60	R_Col_0_1.raw
	EYADFVFQEYGGK	Q9SR37	1	1	CID		52.9589	3.94924	1	1	21383536	2	776.926	1552.84	95.9556	61.2905	21309	21309	MS2	19/36	R_Col_0_1.raw
	ALDFILGWHLDTTTFGDYPQIMK	Q9SR37	1	1	CID		37.6601	3.88506	1	1	1.22318e+06	2	1341.69	2682.37	14.5396	96.6609	35103	35103	MS2	21/66	R_Col_0_1.raw
	GVSQAGVQFYHDLIDELIK	Q9SR37	1	1	CID		57.1849	3.88011		2	922707	2	1067.01	2133.02	431.342	91.9055	33245	33245	MS2	23/54	R_Col_0_1.raw
	EYADFVFQEYGGK	Q9SR37	1	1	CID		28.4041	3.85879	1	1	928261	2	777.426	1553.84	739.471	62.6611	21849	21849	MS2	17/36	R_Col_0_1.raw
	ALDFILGWHLDTTTFGDYPQIMK	Q9SR37	1	1	CID		37.1351	3.82893	1	1	884216	3	895.178	2683.52	444.427	94.3815	34211	34211	MS2	33/132	R_Col_0_1.raw
	DFLSQGVRPSALK	Q9SR37	1	1	CID		30.6638	3.75832	1	1	3.61526e+06	2	709.425	1417.84	43.7517	42.1352	13756	13756	MS2	18/36	R_Col_0_1.raw
	IGIAHSPAWFEAHDLADSQDGASIDR	Q9SR37	1	1	CID		36.3222	3.71705	1	1	1.03727e+06	3	927.095	2779.27	-12.7184	56.0859	19267	19267	MS2	31/150	R_Col_0_1.raw
	EYADFVFQEYGGK	Q9SR37	1	1	CID		46.609	3.68228	1	1	344589	2	777.259	1553.51	525.058	65.8382	23096	23096	MS2	18/36	R_Col_0_1.raw
	HWITFNEPWVFSHAGYDVGK	Q9SR37	1	1	CID		50.8591	3.66865	1	1	827752	2	1195.02	2389.03	-463.794	70.8359	25026	25026	MS2	17/57	R_Col_0_1.raw
	FGLYYVDFK	Q9C525-2;Q9SR37;Q9C8Y9	4	3	CID		27.8938	3.63347	1	1	4.3597e+06	2	576.339	1151.67	80.6466	67.3277	23659	23659	MS2	16/24	R_Col_0_1.raw
	IGIAHSPAWFEAHDLADSQDGASIDR	Q9SR37	1	1	CID		66.011	3.4784	1	1	953347	2	1389.85	2778.7	-217.955	53.8865	18393	18393	MS2	22/75	R_Col_0_1.raw
	YYKDFLSQGVRPSALK	Q9SR37	1	1	CID		29.0154	3.46954	1	1	587292	2	935.929	1870.85	-615.129	39.8022	12833	12833	MS2	20/45	R_Col_0_1.raw
	EYADFVFQEYGGK	Q9SR37	1	1	CID		71.4119	3.42618	1	1	454460	2	777.426	1553.84	739.471	64.1431	22429	22429	MS2	14/36	R_Col_0_1.raw
	EYADFVFQEYGGK	Q9SR37	1	1	CID		15.6269	3.39724	1	1	28723.1	2	777.343	1553.68	632.276	128.454	45897	45897	MS2	15/36	R_Col_0_1.raw
	cNNDNGDVAVDFFHR	Q9SR37	1	1	CID	C1(Carbamidomethyl)	7.13059	3.37211	1	1	997327	2	890.345	1779.68	-38.3266	43.856	14436	14436	MS2	15/42	R_Col_0_1.raw
	HLLSMQEAVcIDK	Q9SR37	1	1	CID	C10(Carbamidomethyl)	12.4822	3.322	1	1	5.06255e+06	2	772.509	1544.01	162.056	43.5041	14296	14296	MS2	15/36	R_Col_0_1.raw
	FGLYYVDFK	Q9C525-2;Q9SR37;Q9C8Y9	4	3	CID		26.0293	3.30612	1	1	52799068	2	576.422	1151.84	225.334	65.7611	23064	23064	MS2	19/24	R_Col_0_1.raw
	GPALWDIYcR	Q9C525-2;Q9SR37	3	2	CID	C9(Carbamidomethyl)	37.1523	3.28988	1	1	4.82995e+06	2	626.423	1251.84	990.526	60.1419	20858	20858	MS2	18/27	R_Col_0_1.raw
	HLLSMQEAVcIDK	Q9SR37	1	1	CID	C10(Carbamidomethyl)	9.98288	3.28581	1	1	7649779	2	772.426	1543.84	54.1156	41.6791	13575	13575	MS2	19/36	R_Col_0_1.raw
	ALDFILGWHLDTTTFGDYPQIMK	Q9SR37	1	1	CID		30.0526	3.26524	1	1	16750.2	2	1341.94	2682.87	200.908	124.904	44754	44754	MS2	22/66	R_Col_0_1.raw
	WMQDSLITWESK	Q9SR37	1	1	CID		53.4578	3.18571	1	1	7.6136e+06	2	762.426	1523.84	81.3622	64.5477	22586	22586	MS2	19/33	R_Col_0_1.raw
	GPALWDIYcR	Q9C525-2;Q9SR37	3	2	CID	C9(Carbamidomethyl)	45.0534	3.1794	1	1	1528520	2	625.173	1249.34	-1008.59	58.77	20320	20320	MS2	21/27	R_Col_0_1.raw
	EYADFVFQEYGGK	Q9SR37	1	1	CID		38.4866	3.17717	1	1	32361	2	777.259	1553.51	525.058	109.794	39894	39894	MS2	15/36	R_Col_0_1.raw
	EYADFVFQEYGGK	Q9SR37	1	1	CID		47.672	3.15209	1	1	11783.6	2	777.509	1554.01	846.643	122.239	43895	43895	MS2	15/36	R_Col_0_1.raw
	YKEDIQLMK	Q9SE50-2;Q9C525-2;Q9SR37;Q9C8Y9	9	4	CID		11.926	3.10892		2	16943096	2	584.339	1167.67	53.5406	24.2006	6644	6644	MS2	16/24	R_Col_0_1.raw
	FGLYYVDFK	Q9C525-2;Q9SR37;Q9C8Y9	4	3	CID		43.2395	2.58811	1	1	388589	1	1150.77	1150.77	-704.527	65.316	22890	22890	MS2	15/24	R_Col_0_1.raw
	YKEDIQLMK	Q9SE50-2;Q9C525-2;Q9SR37;Q9C8Y9	9	4	CID		10.9376	2.54361		2	946275	1	1167.6	1167.6	-6.6439	24.1788	6637	6637	MS2	13/24	R_Col_0_1.raw
P25696	58.56	49	444	47.6893	5.77002	447.383	Bifunctional enolase 2/transcriptional activator OS=Arabidopsis thaliana GN=ENO2 PE=1 SV=1 - [ENO2_ARATH]
	Sequence	Protein Accessions	# Proteins	# Protein Groups	Activation Type	Modifications	Probability	XCorr	Δ Score	Rank	Intensity	Charge	m/z [Da]	MH+ [Da]	ΔM [ppm]	RT [min]	First Scan	Last Scan	MS Order	Ions Matched	Spectrum File	Annotation
	MTTEcGTEVQIVGDDLLVTNPK	P25696	1	1	CID	C5(Carbamidomethyl)	80.2807	5.78085	1	1	787226	2	1211.1	2421.19	423.823	68.134	23970	23970	MS2	27/63	R_Col_0_1.raw
	VTAAVPSGASTGIYEALELR	P25696	1	1	CID		111.081	5.5088	1	1	9224582	2	1003.51	2006.02	478.458	70.6167	24938	24938	MS2	30/57	R_Col_0_1.raw
	DPTQQTAIDNFMVHELDGTQNEWGWcK	P25696	1	1	CID	C26(Carbamidomethyl)	17.157	5.44804	1	1	6807586	3	1074.43	3221.28	270.193	86.3419	31076	31076	MS2	31/156	R_Col_0_1.raw
	VTAAVPSGASTGIYEALELR	P25696	1	1	CID		84.4497	4.97766	1	1	5138269	3	669.507	2006.51	721.027	70.7557	24993	24993	MS2	41/114	R_Col_0_1.raw
	SGETEDTFIADLAVGLSTGQIK	P25696	1	1	CID		23.6672	4.81287	1	1	641680	2	1126.93	2252.86	323.448	95.1305	34505	34505	MS2	18/63	R_Col_0_1.raw
	MTTEcGTEVQIVGDDLLVTNPK	P25696	1	1	CID	C5(Carbamidomethyl)	57.1272	4.77958	1	1	39484.9	2	1211.02	2421.03	355.01	66.6094	23394	23394	MS2	23/63	R_Col_0_1.raw
	VNQIGSVTESIEAVK	P25696	1	1	CID		66.3854	4.55593	1	1	24837738	2	787.426	1573.84	1.05497	48.4666	16256	16256	MS2	26/42	R_Col_0_1.raw
	LAMQEFMILPVGAASFK	P25696	1	1	CID		103.179	4.55139	1	1	13822718	2	926.929	1852.85	-64.6481	88.7446	32012	32012	MS2	26/48	R_Col_0_1.raw
	VTAAVPSGASTGIYEALELR	P25696	1	1	CID		111.422	4.24439	1	1	617933	2	1002.35	2003.69	-685.528	71.2405	25183	25183	MS2	28/57	R_Col_0_1.raw
	GNPTVEVDIHTSNGIK	P25696	1	1	CID		58.0442	4.16523	1	1	2.45766e+06	2	841.427	1681.85	589.702	32.326	9870	9870	MS2	18/45	R_Col_0_1.raw
	LGANAILAVSLAVcK	P25696	1	1	CID	C14(Carbamidomethyl)	40.0667	4.1597	1	1	10395.1	2	750.759	1500.51	432.296	127.266	45514	45514	MS2	22/42	R_Col_0_1.raw
	IEEELGSEAIYAGVNFR	P25696	1	1	CID		70.6103	4.04718	1	1	1.23372e+06	2	948.763	1896.52	-219.377	67.969	23905	23905	MS2	20/48	R_Col_0_1.raw
	YGQDATNVGDEGGFAPNIQENK	P25696	1	1	CID		53.3002	3.94862	1	1	1.67656e+06	2	1162.52	2324.03	-7.13136	44.2038	14574	14574	MS2	20/63	R_Col_0_1.raw
	SGETEDTFIADLAVGLSTGQIK	P25696	1	1	CID		74.3327	3.89854	1	1	1206561	2	1126.52	2252.02	-46.4764	92.5967	33514	33514	MS2	21/63	R_Col_0_1.raw
	SGETEDTFIADLAVGLSTGQIK	P25696	1	1	CID		38.9009	3.86066	1	1	9379.24	2	1127.18	2253.36	545.272	123.205	44209	44209	MS2	18/63	R_Col_0_1.raw
	KYGQDATNVGDEGGFAPNIQENKEGLELLK	P25696	1	1	CID		12.0893	3.8531	1	1	947077	3	1079.1	3235.28	213.018	55.1008	18875	18875	MS2	30/174	R_Col_0_1.raw
	VTAAVPSGASTGIYEALELR	P25696	1	1	CID		9.78341	3.83718	1	1	1137592	3	669.507	2006.51	721.027	72.2504	25578	25578	MS2	36/114	R_Col_0_1.raw
	SGETEDTFIADLAVGLSTGQIK	P25696	1	1	CID		33.7021	3.81372	1	1	15593.5	2	1127.1	2253.19	471.342	110.896	40248	40248	MS2	22/63	R_Col_0_1.raw
	LAMQEFMILPVGAASFK	P25696	1	1	CID		59.0894	3.72033	1	1	1.74824e+06	3	618.423	1853.25	153.153	88.6551	31977	31977	MS2	36/96	R_Col_0_1.raw
	SGETEDTFIADLAVGLSTGQIK	P25696	1	1	CID		34.8644	3.65568	1	1	934714	2	1127.02	2253.02	397.401	92.1713	33348	33348	MS2	19/63	R_Col_0_1.raw
	MTTEcGTEVQIVGDDLLVTNPK	P25696	1	1	CID	C5(Carbamidomethyl)	11.101	3.62251	1	1	833807	2	1210.77	2420.53	148.513	68.7968	24230	24230	MS2	16/63	R_Col_0_1.raw
	SGETEDTFIADLAVGLSTGQIK	P25696	1	1	CID		33.6603	3.59111	1	1	1.42373e+06	3	751.759	2253.26	502.515	93.0079	33675	33675	MS2	28/126	R_Col_0_1.raw
	IEEELGSEAIYAGVNFR	P25696	1	1	CID		52.3434	3.5566	1	1	13562.1	2	949.429	1897.85	483.34	124.223	44534	44534	MS2	16/48	R_Col_0_1.raw
	GNPTVEVDIHTSNGIK	P25696	1	1	CID		47.5352	3.55082	1	1	3439647	2	841.427	1681.85	589.702	30.9554	9328	9328	MS2	19/45	R_Col_0_1.raw
	SGETEDTFIADLAVGLSTGQIK	P25696	1	1	CID		30.2638	3.50656	1	1	11847.9	2	1126.35	2251.69	-194.523	131.178	46787	46787	MS2	17/63	R_Col_0_1.raw
	AVGNVNNIIGPALIGK	P25696	1	1	CID		50.599	3.48904	1	1	677259	2	774.843	1548.68	-793.182	61.6094	21435	21435	MS2	19/45	R_Col_0_1.raw
	LGANAILAVSLAVcK	P25696	1	1	CID	C14(Carbamidomethyl)	21.5127	3.4767		2	14888.7	2	750.425	1499.84	-12.0112	124.431	44602	44602	MS2	20/42	R_Col_0_1.raw
	AGAVVSGIPLYK	P25696	1	1	CID		26.2722	3.44085	1	1	18951626	2	587.839	1174.67	-10.6982	45.5057	15086	15086	MS2	20/33	R_Col_0_1.raw
	LGANAILAVSLAVcK	P25696	1	1	CID	C14(Carbamidomethyl)	26.2144	3.43992	1	1	12995.9	2	750.842	1500.68	543.311	118.11	42568	42568	MS2	20/42	R_Col_0_1.raw
	IEEELGSEAIYAGVNFR	P25696	1	1	CID		61.5542	3.40269	1	1	17790.6	2	949.096	1897.18	132.105	133.606	47575	47575	MS2	22/48	R_Col_0_1.raw
	GNPTVEVDIHTSNGIK	P25696	1	1	CID		43.773	3.38221	1	1	1.22686e+06	2	840.427	1679.85	-600.203	29.5662	8779	8779	MS2	18/45	R_Col_0_1.raw
	IVLPVPAFNVINGGSHAGNK	P25696	1	1	CID		51.5654	3.37932	1	1	991083	2	1003.1	2005.19	540.581	65.6763	23031	23031	MS2	23/57	R_Col_0_1.raw
	GNPTVEVDIHTSNGIK	P25696	1	1	CID		1	3.32986	1	1	1.64953e+06	2	841.51	1682.01	688.733	35.2023	11008	11008	MS2	15/45	R_Col_0_1.raw
	SGETEDTFIADLAVGLSTGQIK	P25696	1	1	CID		38.6538	3.31456	1	1	23087.2	2	1126.52	2252.02	-46.4764	120.281	43264	43264	MS2	16/63	R_Col_0_1.raw
	LGANAILAVSLAVcK	P25696	1	1	CID	C14(Carbamidomethyl)	19.2713	3.27792	1	1	848056	2	751.092	1501.18	876.209	91.5895	33121	33121	MS2	16/42	R_Col_0_1.raw
	LGANAILAVSLAVcK	P25696	1	1	CID	C14(Carbamidomethyl)	50.6408	3.26784		2	42974.9	2	750.592	1500.18	210.192	106.323	38772	38772	MS2	22/42	R_Col_0_1.raw
	LGANAILAVSLAVcK	P25696	1	1	CID	C14(Carbamidomethyl)	21.0642	3.25059		2	1.02985e+06	2	750.509	1500.01	99.1026	78.8792	28165	28165	MS2	16/42	R_Col_0_1.raw
	YGQDATNVGDEGGFAPNIQENK	P25696	1	1	CID		3.27572	3.23362	1	1	1.72845e+06	2	1162.52	2324.03	-7.13136	42.7006	13980	13980	MS2	14/63	R_Col_0_1.raw
	SGETEDTFIADLAVGLSTGQIK	P25696	1	1	CID		15.0261	3.2269	1	1	18294.6	2	1127.18	2253.36	545.272	115.522	41737	41737	MS2	17/63	R_Col_0_1.raw
	LGANAILAVSLAVcK	P25696	1	1	CID	C14(Carbamidomethyl)	26.1275	3.20102		2	18900.9	2	750.509	1500.01	99.1026	120.857	43450	43450	MS2	18/42	R_Col_0_1.raw
	GNPTVEVDIHTSNGIK	P25696	1	1	CID		45.2275	3.18712	1	1	2.79093e+06	2	840.927	1680.85	-4.89639	30.9666	9333	9333	MS2	15/45	R_Col_0_1.raw
	SGETEDTFIADLAVGLSTGQIK	P25696	1	1	CID		14.3461	3.18153	1	1	8429.88	2	1126.43	2251.86	-120.494	123.238	44219	44219	MS2	16/63	R_Col_0_1.raw
	VTAAVPSGASTGIYEALELR	P25696	1	1	CID		1	3.12965	1	1	801559	2	1002.93	2004.85	-103.196	72.7102	25758	25758	MS2	18/57	R_Col_0_1.raw
	ISGDALKDLYK	P25696	1	1	CID		28.4461	3.09301	1	1	7.18791e+06	2	611.839	1222.67	2.96198	35.9125	11290	11290	MS2	15/30	R_Col_0_1.raw
	LGANAILAVSLAVcK	P25696	1	1	CID	C14(Carbamidomethyl)	21.0733	3.08145		2	15012.5	2	750.509	1500.01	99.1026	132.896	47344	47344	MS2	16/42	R_Col_0_1.raw
	LGANAILAVSLAVcK	P25696	1	1	CID	C14(Carbamidomethyl)	34.9408	3.06804	1	1	35263.9	2	750.675	1500.34	321.256	131.08	46755	46755	MS2	18/42	R_Col_0_1.raw
	LGANAILAVSLAVcK	P25696	1	1	CID	C14(Carbamidomethyl)	18.5221	3.06403		2	517662	2	750.509	1500.01	99.1026	102.591	37428	37428	MS2	18/42	R_Col_0_1.raw
	AGAVVSGIPLYK	P25696	1	1	CID		1	2.68711	1	1	2.64454e+06	1	1175.6	1175.6	780.178	45.7107	15168	15168	MS2	17/33	R_Col_0_1.raw
	AGAVVSGIPLYK	P25696	1	1	CID		3.07526	2.62704	1	1	719691	1	1174.02	1174.02	-567.442	45.5257	15095	15095	MS2	18/33	R_Col_0_1.raw
P83484	60.07	44	556	59.6761	6.62451	416.762	ATP synthase subunit beta-2, mitochondrial OS=Arabidopsis thaliana GN=At5g08690 PE=1 SV=1 - [ATPBN_ARATH]
	Sequence	Protein Accessions	# Proteins	# Protein Groups	Activation Type	Modifications	Probability	XCorr	Δ Score	Rank	Intensity	Charge	m/z [Da]	MH+ [Da]	ΔM [ppm]	RT [min]	First Scan	Last Scan	MS Order	Ions Matched	Spectrum File	Annotation
	DAPALVDLATGQEILATGIK	P83484	3	1	CID		96.4145	5.81444	1	1	5345181	2	999.014	1997.02	462.465	88.7913	32030	32030	MS2	28/57	R_Col_0_1.raw
	DAPALVDLATGQEILATGIK	P83484	3	1	CID		118.874	5.75296	1	1	1390231	2	999.014	1997.02	462.465	87.4136	31493	31493	MS2	26/57	R_Col_0_1.raw
	NLQDIIAILGMDELSEDDKLTVAR	P83484	3	1	CID		129.477	5.36334	1	1	759898	2	1336.69	2672.37	-5.65521	96.5593	35063	35063	MS2	23/69	R_Col_0_1.raw
	KGSITSVQAIYVPADDLTDPAPATTFAHLDATTVLSR	P83484	3	1	CID		28.2137	5.32611	0.0250081	1	1.00727e+06	3	1282.02	3844.04	276.06	78.8746	28163	28163	MS2	31/216	R_Col_0_1.raw
	IPSAVGYQPTLASDLGALQER	P83484	3	1	CID		107.116	5.25223	1	1	9913001	2	1094.1	2187.19	477.707	69.0905	24344	24344	MS2	31/60	R_Col_0_1.raw
	TVLIMELINNVAK	P83484	3	1	CID		55.2086	5.16808	1	1	9891393	2	729.508	1458.01	116.355	88.2386	31814	31814	MS2	24/36	R_Col_0_1.raw
	QISELGIYPAVDPLDSTSR	P83484	3	1	CID		69.5334	5.11452	1	1	6547805	2	1031.51	2062.02	470.926	71.5819	25316	25316	MS2	24/54	R_Col_0_1.raw
	cALVYGQMNEPPGAR	P83484	3	1	CID	C1(Carbamidomethyl)	73.852	5.07148	1	1	13504193	2	832.427	1663.85	645.43	37.0871	11756	11756	MS2	26/42	R_Col_0_1.raw
	FTQANSEVSALLGR	P83484	3	1	CID		86.4792	4.94463	1	1	8106708	2	747.425	1493.84	714.843	53.8574	18380	18380	MS2	22/39	R_Col_0_1.raw
	FTQANSEVSALLGR	P83484	3	1	CID		65.2226	4.8956	1	1	1.31257e+06	2	747.175	1493.34	380.256	54.1367	18491	18491	MS2	23/39	R_Col_0_1.raw
	DAEGQDVLLFIDNIFR	P83484	3	1	CID		84.0484	4.8185	1	1	52009.2	2	933.596	1866.18	664.376	108.742	39556	39556	MS2	25/45	R_Col_0_1.raw
	IPSAVGYQPTLASDLGALQER	P83484	3	1	CID		52.8524	4.76755	1	1	5576229	3	729.508	2186.51	166.977	69.5961	24542	24542	MS2	37/120	R_Col_0_1.raw
	VGLTGLTVAEYFR	P83484	3	1	CID		57.227	4.65435	1	1	18128324	2	713.508	1426.01	164.808	73.5672	26090	26090	MS2	24/36	R_Col_0_1.raw
	DAPALVDLATGQEILATGIK	P83484	3	1	CID		104.748	4.50666	1	1	2.3234e+06	3	666.257	1996.76	330.78	88.5608	31940	31940	MS2	40/114	R_Col_0_1.raw
	LVLEVSHHLGQNVVR	P83484	3	1	CID		68.9108	4.45877	1	1	1.7939e+06	2	850.427	1699.85	-66.4369	32.3804	9892	9892	MS2	25/42	R_Col_0_1.raw
	IMNVLGEPIDER	P83484	3	1	CID		23.3484	4.44292	1	1	10199427	2	693.424	1385.84	95.1509	51.3424	17390	17390	MS2	21/33	R_Col_0_1.raw
	TVLIMELINNVAK	P83484	3	1	CID		45.3047	4.41847	1	1	2.10932e+06	2	729.508	1458.01	116.355	89.9019	32462	32462	MS2	24/36	R_Col_0_1.raw
	VcQVIGAIVDVR	P83484	3	1	CID	C2(Carbamidomethyl)	44.3076	4.37528	1	1	11454630	2	665.007	1329.01	204.128	53.9466	18416	18416	MS2	24/33	R_Col_0_1.raw
	NLQDIIAILGMDELSEDDKLTVAR	P83484	3	1	CID		96.3255	4.35593	1	1	942840	2	1336.52	2672.03	-130.407	97.7184	35518	35518	MS2	19/69	R_Col_0_1.raw
	LVLEVSHHLGQNVVR	P83484	3	1	CID		38.8405	4.34848	1	1	3.46581e+06	2	850.511	1700.01	31.6099	33.751	10435	10435	MS2	21/42	R_Col_0_1.raw
	TVLIMELINNVAK	P83484	3	1	CID		53.1351	4.17043	1	1	840217	2	729.842	1458.68	573.346	91.3027	33009	33009	MS2	23/36	R_Col_0_1.raw
	NLQDIIAILGMDELSEDDKLTVAR	P83484	3	1	CID		41.7044	4.129	1	1	1.95886e+06	3	891.761	2673.27	332.369	96.4004	35000	35000	MS2	33/138	R_Col_0_1.raw
	QISELGIYPAVDPLDSTSR	P83484	3	1	CID		1.44774	4.1041	1	1	1.68999e+06	3	688.091	2062.26	585.768	72.2271	25568	25568	MS2	30/108	R_Col_0_1.raw
	IPSAVGYQPTLASDLGALQER	P83484	3	1	CID		51.9699	3.91396	1	1	671510	2	1094.02	2187.02	401.535	70.6517	24953	24953	MS2	19/60	R_Col_0_1.raw
	TIAMDGTEGLVR	P83484	3	1	CID		51.0227	3.76798	1	1	18780072	2	632.34	1263.67	816.078	39.4483	12692	12692	MS2	22/33	R_Col_0_1.raw
	TVLImELINNVAK	P83484	3	1	CID	M5(Oxidation)	54.9612	3.76494	1	1	1.77987e+06	2	737.508	1474.01	118.752	88.563	31941	31941	MS2	19/36	R_Col_0_1.raw
	NLQDIIAILGMDELSEDDKLTVAR	P83484	3	1	CID		21.5068	3.70274	1	1	2.9155e+06	3	891.761	2673.27	332.369	97.7792	35541	35541	MS2	31/138	R_Col_0_1.raw
	VLNTGAPITVPVGR	P83484	3	1	CID		54.4798	3.62578	1	1	28336534	2	697.508	1394.01	137.624	45.5519	15104	15104	MS2	26/39	R_Col_0_1.raw
	TIAMDGTEGLVR	P83484	3	1	CID		39.1311	3.62417	1	1	28998118	2	631.84	1262.67	24.7374	39.5375	12728	12728	MS2	23/33	R_Col_0_1.raw
	TVLIMELINNVAK	P83484	3	1	CID		30.8104	3.58144	1	1	637544	2	729.092	1457.18	-455.472	92.3249	33408	33408	MS2	22/36	R_Col_0_1.raw
	cALVYGQMNEPPGAR	P83484	3	1	CID	C1(Carbamidomethyl)	34.6879	3.56932	1	1	2.98749e+06	2	831.51	1662.01	-456.959	37.7734	12029	12029	MS2	21/42	R_Col_0_1.raw
	VVDLLAPYQR	P83484	3	1	CID		23.5691	3.52391	1	1	19485498	2	587.922	1174.84	999.724	50.2026	16940	16940	MS2	15/27	R_Col_0_1.raw
	TVLIMELINNVAK	P83484	3	1	CID		1	3.48054	1	1	722451	2	730.092	1459.18	915.815	97.5352	35446	35446	MS2	15/36	R_Col_0_1.raw
	VcQVIGAIVDVR	P83484	3	1	CID	C2(Carbamidomethyl)	7.67105	3.43137	1	1	6.14786e+06	2	665.09	1329.17	329.496	55.5674	19059	19059	MS2	19/33	R_Col_0_1.raw
	TVLIMELINNVAK	P83484	3	1	CID		1	3.39273	1	1	1.30055e+06	2	729.925	1458.84	687.529	93.7418	33961	33961	MS2	18/36	R_Col_0_1.raw
	FEDQEGLPPIMTSLEVQDHPTR	P83484	3	1	CID		65.2988	3.37042	1	1	29153.7	2	1270.52	2540.03	321.577	66.8688	23485	23485	MS2	19/63	R_Col_0_1.raw
	ENINSFQGLLDGK	P83484	3	1	CID		1.57382	3.33868	1	1	2.81669e+06	2	718.425	1435.84	779.919	59.4671	20594	20594	MS2	15/36	R_Col_0_1.raw
	YDDLSEQSFYMVGGIDEVVAK	P83484	3	1	CID		39.5901	3.2952	1	1	1.02584e+06	2	1183.68	2366.36	536.57	81.9878	29377	29377	MS2	19/60	R_Col_0_1.raw
	VcQVIGAIVDVR	P83484	3	1	CID	C2(Carbamidomethyl)	27.974	3.23527	1	1	1.49286e+06	2	664.757	1328.51	-172.165	57.2138	19710	19710	MS2	21/33	R_Col_0_1.raw
	VcQVIGAIVDVR	P83484	3	1	CID	C2(Carbamidomethyl)	10.848	3.22939	1	1	16127.8	2	665.424	1329.84	830.654	125.287	44878	44878	MS2	22/33	R_Col_0_1.raw
	VVDLLAPYQR	P83484	3	1	CID		13.4708	3.14878	1	1	23387336	2	587.422	1173.84	148.652	50.2946	16976	16976	MS2	15/27	R_Col_0_1.raw
	IGLFGGAGVGK	P83484;P19366	4	2	CID		29.2887	3.11134	1	1	3.36413e+06	2	488.337	975.667	107.018	42.9162	14065	14065	MS2	18/30	R_Col_0_1.raw
	TVLIMELINNVAK	P83484	3	1	CID		7.63975	2.6791	1	1	859024	1	1457.77	1457.77	-46.1653	88.0849	31755	31755	MS2	15/36	R_Col_0_1.raw
	FTQANSEVSALLGR	P83484	3	1	CID		69.7414	2.66769	1	1	1.90342e+06	1	1492.77	1492.77	-1.62883	53.2443	18142	18142	MS2	15/39	R_Col_0_1.raw
Q9SRV5	35.29	50	765	84.5306	6.50732	411.038	5-methyltetrahydropteroyltriglutamate--homocysteine methyltransferase 2 OS=Arabidopsis thaliana GN=MS2 PE=1 SV=1 - [METE2_ARATH]
	Sequence	Protein Accessions	# Proteins	# Protein Groups	Activation Type	Modifications	Probability	XCorr	Δ Score	Rank	Intensity	Charge	m/z [Da]	MH+ [Da]	ΔM [ppm]	RT [min]	First Scan	Last Scan	MS Order	Ions Matched	Spectrum File	Annotation
	HETcYQIALAIKDEVEDLEK	Q9SRV5;O50008	2	2	CID	C4(Carbamidomethyl)	71.5235	6.01602	1	1	2438767	3	802.176	2404.51	143.239	76.3335	27171	27171	MS2	37/114	R_Col_0_1.raw
	MLAVLEQNILWVNPDcGLK	Q9SRV5;O50008	2	2	CID	C16(Carbamidomethyl)	30.7305	5.53837	1	1	3.43939e+06	3	738.425	2213.26	51.9869	88.1467	31778	31778	MS2	34/108	R_Col_0_1.raw
	ALGVETVPVLVGPVSYLLLSK	Q9SRV5	1	1	CID		54.8758	5.38433	1	1	1.7757e+06	3	718.841	2154.51	107.323	100.129	36461	36461	MS2	40/120	R_Col_0_1.raw
	GMLTGPVTILNWSFVR	Q9SRV5;O50008	3	2	CID		82.9598	5.16562	1	1	9293849	2	896.012	1791.02	29.8699	92.7167	33560	33560	MS2	28/45	R_Col_0_1.raw
	ALAGQTNESFFTANADALSSR	Q9SRV5	1	1	CID		77.2649	5.07223	1	1	903482	2	1085.6	2170.19	-390.137	58.5677	20241	20241	MS2	24/60	R_Col_0_1.raw
	NIWANDLAASLITLQSLEGVVGK	Q9SRV5	1	1	CID		63.3284	5.04362	0.0313509	1	54447	2	1207.02	2413.03	296.055	106.629	38874	38874	MS2	28/66	R_Col_0_1.raw
	GMLTGPVTILNWSFVR	Q9SRV5;O50008	3	2	CID		65.4817	4.93762	1	1	2.86335e+06	2	896.012	1791.02	29.8699	91.3319	33020	33020	MS2	23/45	R_Col_0_1.raw
	LNLPILPTTTIGSFPQTVELR	Q9SRV5;O50008	2	2	CID		97.0914	4.84818	1	1	2.41432e+06	2	1156.1	2311.19	383.198	90.5495	32714	32714	MS2	23/60	R_Col_0_1.raw
	NIWANDLAASLITLQSLEGVVGK	Q9SRV5	1	1	CID		117.61	4.81716	1	1	73759.1	3	804.76	2412.26	-20.1828	106.187	38726	38726	MS2	32/132	R_Col_0_1.raw
	LVVSTScSLLHTAVDLINETK	Q9SRV5;O50008	2	2	CID	C7(Carbamidomethyl)	24.312	4.74297	1	1	4.64315e+06	3	767.759	2301.26	454.478	82.6087	29618	29618	MS2	39/120	R_Col_0_1.raw
	MLAVLEQNILWVNPDcGLK	Q9SRV5;O50008	2	2	CID	C16(Carbamidomethyl)	62.9312	4.52113	1	1	994506	2	1107.6	2214.19	471.868	89.8752	32452	32452	MS2	20/54	R_Col_0_1.raw
	GGIGVIQIDEAALR	Q9SRV5;O50008	2	2	CID		71.4615	4.43164	1	1	1.56294e+06	2	705.925	1410.84	-672.423	61.2476	21293	21293	MS2	24/39	R_Col_0_1.raw
	GGIGVIQIDEAALR	Q9SRV5;O50008	2	2	CID		44.2245	4.33614	1	1	4162294	2	706.508	1412.01	154.395	62.6136	21830	21830	MS2	24/39	R_Col_0_1.raw
	MLAVLEQNILWVNPDcGLK	Q9SRV5;O50008	2	2	CID	C16(Carbamidomethyl)	74.694	4.17377	1	1	4.39922e+06	2	1107.1	2213.19	20.2357	88.4684	31904	31904	MS2	27/54	R_Col_0_1.raw
	KLNLPILPTTTIGSFPQTVELR	Q9SRV5;O50008	2	2	CID		48.202	4.17277	1	1	1.37957e+06	2	1219.68	2438.36	-16.486	80.8802	28945	28945	MS2	23/63	R_Col_0_1.raw
	YGAGIGPGVYDIHSPR	Q9SRV5;O50008	3	2	CID		17.9982	4.10891	1	1	12875994	2	830.427	1659.85	613.3	38.3162	12242	12242	MS2	24/45	R_Col_0_1.raw
	HETcYQIALAIKDEVEDLEKGGIGVIQIDEAALR	Q9SRV5;O50008	2	2	CID	C4(Carbamidomethyl)	1	4.00974	1	1	986176	3	1266.19	3796.54	-105.69	96.5545	35061	35061	MS2	31/198	R_Col_0_1.raw
	GMLTGPVTILNWSFVR	Q9SRV5;O50008	3	2	CID		63.0233	3.988	1	1	748339	2	896.512	1792.02	587.895	94.1161	34107	34107	MS2	18/45	R_Col_0_1.raw
	MLAVLEQNILWVNPDcGLK	Q9SRV5;O50008	2	2	CID	C16(Carbamidomethyl)	9.38809	3.98014	1	1	35819.6	2	1107.77	2214.52	622.321	122.255	43900	43900	MS2	17/54	R_Col_0_1.raw
	LNLPILPTTTIGSFPQTVELR	Q9SRV5;O50008	2	2	CID		24.0773	3.97917	1	1	3.40042e+06	3	771.092	2311.26	413.592	90.229	32589	32589	MS2	31/120	R_Col_0_1.raw
	WFDTNYHYIVPELGPEVK	Q9SRV5	1	1	CID		82.7528	3.89897	1	1	897927	2	1104.18	2207.36	125.178	71.6379	25338	25338	MS2	18/51	R_Col_0_1.raw
	ALGVETVPVLVGPVSYLLLSK	Q9SRV5	1	1	CID		16.0953	3.88862	1	1	1.38757e+06	2	1078.1	2155.19	422.686	99.3859	36170	36170	MS2	20/60	R_Col_0_1.raw
	DKLVVSTScSLLHTAVDLINETK	Q9SRV5;O50008	2	2	CID	C9(Carbamidomethyl)	38.86	3.83211	1	1	1.31451e+06	3	848.594	2543.77	168.507	82.6732	29644	29644	MS2	35/132	R_Col_0_1.raw
	KAEHSFYLDWAVHSFR	Q9SRV5	1	1	CID		22.2226	3.82404	0.132302	1	970534	2	997.347	1993.69	358.529	52.008	17653	17653	MS2	17/45	R_Col_0_1.raw
	GGIGVIQIDEAALR	Q9SRV5;O50008	2	2	CID		6.3198	3.76211	1	1	1.5721e+06	2	706.925	1412.84	744.143	60.8472	21136	21136	MS2	18/39	R_Col_0_1.raw
	YGAGIGPGVYDIHSPR	Q9SRV5;O50008	3	2	CID		10.1701	3.71993	1	1	17370234	2	829.927	1658.85	10.8295	38.4062	12278	12278	MS2	20/45	R_Col_0_1.raw
	GmLTGPVTILNWSFVR	Q9SRV5;O50008	3	2	CID	M2(Oxidation)	63.6762	3.71418	1	1	1.70946e+06	2	904.512	1808.02	585.676	86.808	31257	31257	MS2	16/45	R_Col_0_1.raw
	KLNLPILPTTTIGSFPQTVELR	Q9SRV5;O50008	2	2	CID		18.5698	3.69149	1	1	8930620	3	813.927	2439.77	558.839	80.7154	28880	28880	MS2	32/126	R_Col_0_1.raw
	HETcYQIALAIKDEVEDLEK	Q9SRV5;O50008	2	2	CID	C4(Carbamidomethyl)	34.3001	3.56787	1	1	691597	2	1202.52	2404.03	-59.2881	76.368	27186	27186	MS2	19/57	R_Col_0_1.raw
	LNLPILPTTTIGSFPQTVELR	Q9SRV5;O50008	2	2	CID		41.2041	3.54371	1	1	926417	2	1155.18	2309.36	-410.384	90.9804	32883	32883	MS2	16/60	R_Col_0_1.raw
	FALESFWDGK	Q9SRV5;O50008	3	2	CID		33.6962	3.49658	1	1	17568216	2	600.339	1199.67	81.5196	70.7536	24992	24992	MS2	21/27	R_Col_0_1.raw
	FALESFWDGK	Q9SRV5;O50008	3	2	CID		34.246	3.47856	1	1	12470887	2	600.839	1200.67	914.335	70.7082	24974	24974	MS2	22/27	R_Col_0_1.raw
	HETcYQIALAIKDEVEDLEK	Q9SRV5;O50008	2	2	CID	C4(Carbamidomethyl)	54.517	3.44656	1	1	506183	2	1202.52	2404.03	-59.2881	74.7895	26568	26568	MS2	21/57	R_Col_0_1.raw
	YLFAGVVDGR	Q9SRV5;O50008	2	2	CID		41.0951	3.44142	1	1	20895540	2	548.838	1096.67	82.4264	50.385	17012	17012	MS2	19/27	R_Col_0_1.raw
	ALGVETVPVLVGPVSYLLLSK	Q9SRV5	1	1	CID		12.2681	3.42202	1	1	956824	2	1077.6	2154.19	-41.3388	100.779	36717	36717	MS2	14/60	R_Col_0_1.raw
	LVVSTScSLLHTAVDLINETK	Q9SRV5;O50008	2	2	CID	C7(Carbamidomethyl)	18.7805	3.36027	1	1	936861	2	1150.6	2300.19	-10.6173	83.1807	29842	29842	MS2	15/60	R_Col_0_1.raw
	KLNLPILPTTTIGSFPQTVELR	Q9SRV5;O50008	2	2	CID		9.58275	3.34367	1	1	934672	2	1220.18	2439.36	393.472	79.6734	28474	28474	MS2	20/63	R_Col_0_1.raw
	AEHSFYLDWAVHSFR	Q9SRV5	1	1	CID		31.2251	3.29797		2	1.14624e+06	2	932.929	1864.85	-13.975	62.9929	21979	21979	MS2	18/42	R_Col_0_1.raw
	GmLTGPVTILNWSFVR	Q9SRV5;O50008	3	2	CID	M2(Oxidation)	56.0042	3.27269	1	1	1.00303e+06	2	904.512	1808.02	585.676	92.9127	33637	33637	MS2	15/45	R_Col_0_1.raw
	GGIGVIQIDEAALR	Q9SRV5;O50008	2	2	CID		16.8165	3.27005	1	1	11463.6	2	706.341	1411.68	-81.6993	123.038	44156	44156	MS2	18/39	R_Col_0_1.raw
	MLAVLEQNILWVNPDcGLK	Q9SRV5;O50008	2	2	CID	C16(Carbamidomethyl)	18.4443	3.26322	1	1	1.10185e+06	2	1107.68	2214.36	547.1	92.3127	33403	33403	MS2	14/54	R_Col_0_1.raw
	DKLVVSTScSLLHTAVDLINETK	Q9SRV5;O50008	2	2	CID	C9(Carbamidomethyl)	19.3155	3.25793	1	1	1.32108e+06	2	1272.85	2544.7	533.811	83.6499	30026	30026	MS2	16/66	R_Col_0_1.raw
	SFDLLSLLPK	Q9SRV5	1	1	CID		19.1717	3.181	1	1	1.31224e+06	2	566.922	1132.84	154.56	89.8684	32449	32449	MS2	20/27	R_Col_0_1.raw
	GVTAFGFDLVR	Q9SRV5;O50008	2	2	CID		36.1111	3.15558	1	1	526167	2	591.256	1181.5	-107.838	67.1289	23580	23580	MS2	21/30	R_Col_0_1.raw
	SFDLLSLLPK	Q9SRV5	1	1	CID		1	3.14734	1	1	1.06823e+06	2	567.422	1133.84	1036.4	89.7335	32397	32397	MS2	19/27	R_Col_0_1.raw
	MLAVLEQNILWVNPDcGLK	Q9SRV5;O50008	2	2	CID	C16(Carbamidomethyl)	35.1441	3.12605	1	1	32532.2	2	1107.35	2213.69	246.103	126.148	45155	45155	MS2	15/54	R_Col_0_1.raw
	GGIGVIQIDEAALR	Q9SRV5;O50008	2	2	CID		17.1216	3.12245	1	1	21348.9	2	706.841	1412.68	626.249	118.676	42748	42748	MS2	14/39	R_Col_0_1.raw
	KAEHSFYLDWAVHSFR	Q9SRV5	1	1	CID		28.4243	3.11366		2	1.19709e+06	2	996.513	1992.02	-477.859	53.107	18088	18088	MS2	17/45	R_Col_0_1.raw
	GGIGVIQIDEAALR	Q9SRV5;O50008	2	2	CID		7.35325	2.89225	1	1	756197	1	1411.85	1411.85	45.6115	61.3153	21320	21320	MS2	17/39	R_Col_0_1.raw
	YLFAGVVDGR	Q9SRV5;O50008	2	2	CID		1	2.67966	1	1	8088641	1	1097.6	1097.6	929.428	49.981	16854	16854	MS2	15/27	R_Col_0_1.raw
Q9ASR1	35.59	36	843	93.8302	6.25244	380.041	Elongation factor 2 OS=Arabidopsis thaliana GN=LOS1 PE=1 SV=1 - [EF2_ARATH]
	Sequence	Protein Accessions	# Proteins	# Protein Groups	Activation Type	Modifications	Probability	XCorr	Δ Score	Rank	Intensity	Charge	m/z [Da]	MH+ [Da]	ΔM [ppm]	RT [min]	First Scan	Last Scan	MS Order	Ions Matched	Spectrum File	Annotation
	STLTDSLVAAAGIIAQEVAGDVR	Q9ASR1	1	1	CID		75.335	5.74005	1	1	38803.7	2	1128.43	2255.86	-596.42	109.969	39950	39950	MS2	25/66	R_Col_0_1.raw
	GVQYLNEIKDSVVAGFQWASK	Q9ASR1	1	1	CID		106.392	5.17495	1	1	1.13775e+06	2	1170.77	2340.53	565.38	84.5071	30360	30360	MS2	23/60	R_Col_0_1.raw
	GVQYLNEIKDSVVAGFQWASK	Q9ASR1	1	1	CID		87.3347	5.08402	1	1	1.39144e+06	2	1170.02	2339.03	-75.5628	84.6079	30399	30399	MS2	23/60	R_Col_0_1.raw
	DLQDDFMGGAEIIK	Q9ASR1	1	1	CID		56.331	4.96242	1	1	5969367	2	776.426	1551.84	69.8877	71.9507	25460	25460	MS2	22/39	R_Col_0_1.raw
	VENLYEGPLDDQYANAIR	Q9ASR1	1	1	CID		34.9989	4.89122	1	1	887620	2	1041.01	2081.02	491.651	60.0301	20816	20816	MS2	17/51	R_Col_0_1.raw
	IWAFGPETTGPNMVVDMcK	Q9ASR1	1	1	CID	C18(Carbamidomethyl)	120.49	4.87734	1	1	3.80613e+06	2	1077.02	2153.02	16.8252	76.2383	27134	27134	MS2	25/54	R_Col_0_1.raw
	GHVFEEMQRPGTPLYNIK	Q9ASR1	2	1	CID		56.0072	4.79321	1	1	2341470	2	1058.51	2116.02	-20.0596	40.8274	13239	13239	MS2	25/51	R_Col_0_1.raw
	AYLPVVESFGFSSQLR	Q9ASR1	2	1	CID		85.0171	4.75691	1	1	818031	3	601.006	1801	594.214	79.426	28377	28377	MS2	36/90	R_Col_0_1.raw
	VENLYEGPLDDQYANAIR	Q9ASR1	1	1	CID		78.7981	4.72926	1	1	1.64993e+06	2	1040.51	2080.02	11.1139	60.2148	20888	20888	MS2	24/51	R_Col_0_1.raw
	YRVENLYEGPLDDQYANAIR	Q9ASR1	1	1	CID		14.0204	4.72742	1	1	871449	2	1200.6	2400.19	429.772	58.1061	20060	20060	MS2	19/57	R_Col_0_1.raw
	AYLPVVESFGFSSQLR	Q9ASR1	2	1	CID		51.1829	4.65045	1	1	1.29416e+06	2	901.095	1801.18	693.939	80.594	28833	28833	MS2	24/45	R_Col_0_1.raw
	VENLYEGPLDDQYANAIR	Q9ASR1	1	1	CID		57.1343	4.61368	1	1	1.91979e+06	2	1040.93	2080.85	411.594	61.772	21499	21499	MS2	23/51	R_Col_0_1.raw
	RQETVEDVPcGNTVAMVGLDQFITK	Q9ASR1	1	1	CID	C10(Carbamidomethyl)	56.8746	4.56412	1	1	928889	2	1404.02	2807.04	-119.327	71.0162	25096	25096	MS2	28/72	R_Col_0_1.raw
	STLTDSLVAAAGIIAQEVAGDVR	Q9ASR1	1	1	CID		82.2112	4.48646	1	1	38194.3	2	1129.1	2257.19	-5.35155	109.435	39779	39779	MS2	26/66	R_Col_0_1.raw
	RQETVEDVPcGNTVAMVGLDQFITK	Q9ASR1	1	1	CID	C10(Carbamidomethyl)	115.12	4.41548	1	1	2.57217e+06	3	936.512	2807.52	54.1383	71.4439	25262	25262	MS2	36/144	R_Col_0_1.raw
	VIENANVIMATYEDPLLGDVQVYPEK	Q9ASR1	1	1	CID		54.289	4.35003	1	1	661714	2	1460.86	2920.7	81.937	86.2132	31026	31026	MS2	21/75	R_Col_0_1.raw
	AYLPVVESFGFSSQLR	Q9ASR1	2	1	CID		66.0277	4.2808	0.251438	1	10569893	2	900.512	1800.02	46.2337	79.0997	28250	28250	MS2	23/45	R_Col_0_1.raw
	RQETVEDVPcGNTVAMVGLDQFITK	Q9ASR1	1	1	CID	C10(Carbamidomethyl)	67.8367	4.1724	1	1	1.05467e+06	2	1404.69	2808.37	355.51	70.8194	25019	25019	MS2	23/72	R_Col_0_1.raw
	QETVEDVPcGNTVAMVGLDQFITK	Q9ASR1	1	1	CID	C9(Carbamidomethyl)	43.0086	4.14761	1	1	826451	2	1326.1	2651.2	-26.4721	80.0833	28634	28634	MS2	22/69	R_Col_0_1.raw
	LLEPVYMVEIQAPEGALGGIYSVLNQK	Q9ASR1	2	1	CID		76.3187	4.07051	1	1	708806	2	1466.69	2932.37	278.766	100.081	36442	36442	MS2	28/78	R_Col_0_1.raw
	ILAEEFGWDKDLAK	Q9ASR1	1	1	CID		67.2032	4.06763	1	1	2574057	2	817.927	1634.85	2.17158	56.3043	19352	19352	MS2	18/39	R_Col_0_1.raw
	DGNEYLINLIDSPGHVDFSSEVTAALR	Q9ASR1	1	1	CID		43.9684	3.94103	1	1	1.25921e+06	2	1467.19	2933.37	320.033	93.5293	33878	33878	MS2	19/78	R_Col_0_1.raw
	DGNEYLINLIDSPGHVDFSSEVTAALR	Q9ASR1	1	1	CID		34.149	3.93368	1	1	1.39208e+06	3	978.013	2932.02	-139.031	93.1901	33746	33746	MS2	26/156	R_Col_0_1.raw
	IWAFGPETTGPNMVVDMcK	Q9ASR1	1	1	CID	C18(Carbamidomethyl)	46.1376	3.92001	1	1	811327	2	1077.52	2154.02	481.074	77.6445	27684	27684	MS2	18/54	R_Col_0_1.raw
	DLQDDFMGGAEIIK	Q9ASR1	1	1	CID		50.5268	3.8313	1	1	1.46854e+06	2	775.843	1550.68	-682.433	72.5544	25696	25696	MS2	21/39	R_Col_0_1.raw
	RVIYASQITAKPR	Q9ASR1	2	1	CID		36.2085	3.74235	1	1	211916	3	501.921	1503.75	576.514	18.0298	4233	4233	MS2	31/72	R_Col_0_1.raw
	GFVQFcYEPIK	Q9ASR1	1	1	CID	C6(Carbamidomethyl)	22.9134	3.62439	1	1	4.08775e+06	2	694.424	1387.84	122.333	58.629	20264	20264	MS2	16/30	R_Col_0_1.raw
	STLTDSLVAAAGIIAQEVAGDVR	Q9ASR1	1	1	CID		76.8336	3.60826	1	1	19388.4	2	1129.35	2257.69	216.119	111.693	40505	40505	MS2	23/66	R_Col_0_1.raw
	NcDPNGPLMLYVSK	Q9ASR1	1	1	CID	C2(Carbamidomethyl)	59.477	3.49385	1	1	4327931	2	804.926	1608.85	677.438	53.9918	18434	18434	MS2	20/39	R_Col_0_1.raw
	AYLPVVESFGFSSQLR	Q9ASR1	2	1	CID		27.297	3.41229	1	1	407718	2	900.345	1799.68	-138.979	81.9318	29355	29355	MS2	17/45	R_Col_0_1.raw
	VIENANVIMATYEDPLLGDVQVYPEK	Q9ASR1	1	1	CID		18.6631	3.39684	1	1	768163	2	1461.19	2921.37	310.126	87.7998	31644	31644	MS2	18/75	R_Col_0_1.raw
	LWGENFFDPATR	Q9ASR1	1	1	CID		23.9975	3.24855	1	1	6.55772e+06	2	727.425	1453.84	792.3	70.7987	25010	25010	MS2	19/33	R_Col_0_1.raw
	AYLPVVESFGFSSQLR	Q9ASR1	2	1	CID		1	3.22032	1	1	803106	2	900.678	1800.35	231.378	83.4176	29935	29935	MS2	16/45	R_Col_0_1.raw
	GHVFEEMQRPGTPLYNIK	Q9ASR1	2	1	CID		60.1337	3.2088	1	1	1.70692e+06	2	1058.51	2116.02	-20.0596	42.2013	13783	13783	MS2	15/51	R_Col_0_1.raw
	DLQDDFMGGAEIIK	Q9ASR1	1	1	CID		4.41114	3.01356	1	1	733042	1	1552.86	1552.86	722.239	71.9417	25458	25458	MS2	17/39	R_Col_0_1.raw
	DLQDDFMGGAEIIK	Q9ASR1	1	1	CID		58.0785	2.65126	1	1	1.28931e+06	1	1551.69	1551.69	-29.1007	72.1628	25544	25544	MS2	17/39	R_Col_0_1.raw
P22953	48.08	41	651	71.3131	5.12256	370.183	Probable mediator of RNA polymerase II transcription subunit 37e OS=Arabidopsis thaliana GN=MED37E PE=1 SV=3 - [MD37E_ARATH]
	Sequence	Protein Accessions	# Proteins	# Protein Groups	Activation Type	Modifications	Probability	XCorr	Δ Score	Rank	Intensity	Charge	m/z [Da]	MH+ [Da]	ΔM [ppm]	RT [min]	First Scan	Last Scan	MS Order	Ions Matched	Spectrum File	Annotation
	KIEDSIEQAIQWLEGNQLAEADEFEDKMK	P22953	1	1	CID		300	6.72029	1	1	1.44131e+06	3	1136.85	3408.53	264.83	97.0886	35270	35270	MS2	40/168	R_Col_0_1.raw
	KIEDSIEQAIQWLEGNQLAEADEFEDK	P22953	1	1	CID		91.7708	5.74337	1	1	925549	3	1050.51	3149.53	328.031	99.2985	36136	36136	MS2	39/156	R_Col_0_1.raw
	SINPDEAVAYGAAVQGAILSGEGNEK	P22953	1	1	CID		114.852	5.31433	0.360394	1	1.14752e+06	2	1281.1	2561.2	368.835	77.4921	27625	27625	MS2	25/75	R_Col_0_1.raw
	IINEPTAAAIAYGLDK	O65719;Q39043;P22953;P22954;Q9LKR3;Q9LHA8;Q9S9N1	8	7	CID		59.1437	5.12424	1	1	7779391	2	831.01	1661.01	673.067	59.1819	20481	20481	MS2	25/45	R_Col_0_1.raw
	MYQGAGGEAGGPGASGMDDDAPPASGGAGPK	P22953	1	1	CID		123.988	4.9233	1	1	1314927	2	1367.44	2733.87	261.764	31.1599	9410	9410	MS2	28/90	R_Col_0_1.raw
	NQVAMNPVNTVFDAK	P22953;P22954	3	2	CID		69.3239	4.75173	0.227762	1	14005793	2	824.927	1648.85	624.898	52.4855	17840	17840	MS2	24/42	R_Col_0_1.raw
	IINEPTAAAIAYGLDKK	O65719;Q39043;P22953;P22954;Q9LKR3;Q9LHA8;Q9S9N1	8	7	CID		57.9592	4.73409	1	1	6.53207e+06	2	894.595	1788.18	107.444	49.5621	16689	16689	MS2	22/48	R_Col_0_1.raw
	VQQLLQDFFNGK	P22953;P22954;Q9LHA8	4	3	CID		46.9486	4.64637	1	1	14428851	2	719.008	1437.01	177.891	68.1246	23966	23966	MS2	19/33	R_Col_0_1.raw
	MYQGAGGEAGGPGASGMDDDAPPASGGAGPK	P22953	1	1	CID		3.69319	4.60387	1	1	2.37853e+06	3	912.012	2734.02	317.933	31.3765	9494	9494	MS2	37/180	R_Col_0_1.raw
	ATAGDTHLGGEDFDNR	O65719;P22953;P22954;Q9LHA8;Q9S9N1	6	5	CID		78.7985	4.49341	1	1	1.97097e+06	2	838.844	1676.68	566.287	21.5813	5600	5600	MS2	27/45	R_Col_0_1.raw
	GEEKEFAAEEISSMVLIK	P22953	1	1	CID		41.9521	4.47201	1	1	836520	2	1006.01	2011.02	502.199	68.373	24063	24063	MS2	23/51	R_Col_0_1.raw
	IINEPTAAAIAYGLDK	O65719;Q39043;P22953;P22954;Q9LKR3;Q9LHA8;Q9S9N1	8	7	CID		65.0135	4.30559	1	1	4935787	2	830.51	1660.01	71.0558	59.4088	20570	20570	MS2	24/45	R_Col_0_1.raw
	ATAGDTHLGGEDFDNR	O65719;P22953;P22954;Q9LHA8;Q9S9N1	6	5	CID		59.1043	4.21887	1	1	640070	2	838.844	1676.68	566.287	23.0009	6166	6166	MS2	21/45	R_Col_0_1.raw
	MKELESIcNPIIAK	O65719;P22953	2	2	CID	C8(Carbamidomethyl)	51.8374	4.15224	1	1	4031253	2	823.927	1646.85	595.719	42.4131	13866	13866	MS2	18/39	R_Col_0_1.raw
	DAGVIAGLNVMR	O65719;P22953	2	2	CID		51.3793	4.11403	1	1	7474060	2	608.423	1215.84	153.381	57.2485	19724	19724	MS2	24/33	R_Col_0_1.raw
	EQVFSTYSDNQPGVLIQVYEGER	O65719;P22953	2	2	CID		82.9726	4.08851	1	1	1.15897e+06	2	1329.69	2658.37	36.7129	73.2343	25962	25962	MS2	20/66	R_Col_0_1.raw
	NQVAMNPVNTVFDAKR	P22953;P22954	3	2	CID		36.9024	3.9958	1	1	2.85374e+06	2	902.428	1803.85	-37.5647	42.4678	13888	13888	MS2	17/45	R_Col_0_1.raw
	NQVAMNPVNTVFDAK	P22953;P22954	3	2	CID		79.2161	3.98755	1	1	6497419	2	824.51	1648.01	119.545	53.354	18184	18184	MS2	21/42	R_Col_0_1.raw
	EQVFSTYSDNQPGVLIQVYEGER	O65719;P22953	2	2	CID		87.5155	3.96601	1	1	1.12386e+06	2	1329.6	2658.2	-25.9851	74.7035	26535	26535	MS2	19/66	R_Col_0_1.raw
	MYQGAGGEAGGPGASGMDDDAPPASGGAGPK	P22953	1	1	CID		62.1014	3.89338	1	1	2081991	2	1367.02	2733.03	-43.074	31.3436	9482	9482	MS2	28/90	R_Col_0_1.raw
	IINEPTAAAIAYGLDK	O65719;Q39043;P22953;P22954;Q9LKR3;Q9LHA8;Q9S9N1	8	7	CID		7.55343	3.87078	1	1	1.17761e+06	3	554.172	1660.5	364.29	59.0141	20416	20416	MS2	28/90	R_Col_0_1.raw
	FSDSSVQSDMK	P22953	1	1	CID		47.0997	3.8509	1	1	3713196	2	615.756	1230.5	-20.9781	21.6264	5618	5618	MS2	19/30	R_Col_0_1.raw
	EFAAEEISSMVLIK	P22953	1	1	CID		21.9776	3.79046	1	1	1.91539e+06	2	784.009	1567.01	129.536	78.1287	27872	27872	MS2	17/39	R_Col_0_1.raw
	EQVFSTYSDNQPGVLIQVYEGER	O65719;P22953	2	2	CID		1.34979	3.77878	1	1	2136761	3	886.678	2658.02	-93.6047	73.7097	26146	26146	MS2	26/132	R_Col_0_1.raw
	IEDSIEQAIQWLEGNQLAEADEFEDKMK	P22953	1	1	CID		37.8027	3.75346	1	1	540192	3	1094.27	3280.78	379.538	98.9359	35994	35994	MS2	36/162	R_Col_0_1.raw
	EFAAEEISSMVLIK	P22953	1	1	CID		1	3.7306	0.144241	1	2154857	2	784.343	1567.68	554.747	77.9895	27818	27818	MS2	18/39	R_Col_0_1.raw
	ELESIcNPIIAK	O65719;P22953	2	2	CID	C6(Carbamidomethyl)	14.9517	3.72182	1	1	16053184	2	694.424	1387.84	800.898	46.6433	15536	15536	MS2	18/33	R_Col_0_1.raw
	IINEPTAAAIAYGLDKK	O65719;Q39043;P22953;P22954;Q9LKR3;Q9LHA8;Q9S9N1	8	7	CID		13.3122	3.53776	1	1	1.88153e+06	2	894.928	1788.85	480.09	50.9496	17235	17235	MS2	14/48	R_Col_0_1.raw
	IQAGPADKPMIYVEYK	P22953	1	1	CID		54.2832	3.43591	1	1	3743245	2	911.929	1822.85	-49.9951	41.6361	13558	13558	MS2	22/45	R_Col_0_1.raw
	MVNHFVQEFK	O65719;P22953;P22954;Q9LHA8	5	4	CID		26.8203	3.39327	1	1	6071779	2	639.84	1278.67	33.2569	29.6359	8805	8805	MS2	19/27	R_Col_0_1.raw
	TTPSYVAFTDSER	O65719;P22953;P22954;Q9LHA8	5	4	CID		54.7868	3.34281	1	1	20016212	2	737.425	1473.84	106.739	38.225	12206	12206	MS2	21/36	R_Col_0_1.raw
	NALENYAYNMR	O65719;P22953;P22954;Q9LHA8	4	4	CID		42.6439	3.33599	1	1	26168042	2	679.841	1358.67	42.8962	41.133	13358	13358	MS2	20/30	R_Col_0_1.raw
	MDKSTVHDVVLVGGSTR	P22953	1	1	CID		17.2588	3.27349	1	1	682743	2	901.262	1801.52	326.742	26.2138	7448	7448	MS2	19/48	R_Col_0_1.raw
	EIAEAYLGVTIK	P22953	1	1	CID		16.4161	3.22801	1	1	16207.2	2	654.424	1307.84	852.104	132.949	47362	47362	MS2	17/33	R_Col_0_1.raw
	STVHDVVLVGGSTR	P22953	1	1	CID		10.0255	3.17314		2	12941527	2	713.925	1426.84	54.0614	24.3381	6698	6698	MS2	17/39	R_Col_0_1.raw
	EIAEAYLGVTIK	P22953	1	1	CID		15.211	3.17095	1	1	1.23388e+06	2	654.507	1308.01	979.418	71.4581	25268	25268	MS2	14/33	R_Col_0_1.raw
	VEIIANDQGNR	O65719;P22953;P22954;Q9LHA8	5	4	CID		40.7373	3.10217	1	1	311018	2	614.756	1228.5	-100.286	20.0814	5007	5007	MS2	20/30	R_Col_0_1.raw
	FSDSSVQSDMK	P22953	1	1	CID		76.4184	2.89971	1	1	439476	1	1230.52	1230.52	-10.3646	21.6537	5630	5630	MS2	13/30	R_Col_0_1.raw
	VQQLLQDFFNGK	P22953;P22954;Q9LHA8	4	3	CID		39.4684	2.62704	1	1	1.34992e+06	1	1436.94	1436.94	128.993	67.8757	23867	23867	MS2	16/33	R_Col_0_1.raw
	DAGVIAGLNVMR	O65719;P22953	2	2	CID		1	2.58065	1	1	1.27938e+06	1	1215.6	1215.6	-41.5095	57.0922	19663	19663	MS2	13/33	R_Col_0_1.raw
	DAGVIAGLNVMR	O65719;P22953	2	2	CID		1	2.50948	1	1	1168383	1	1215.27	1215.27	-315.814	57.146	19684	19684	MS2	15/33	R_Col_0_1.raw
Q8GTY0	37.64	31	449	49.4708	9.11475	330.067	Elongation factor 1-alpha 4 OS=Arabidopsis thaliana GN=A4 PE=1 SV=2 - [EF1A4_ARATH]
	Sequence	Protein Accessions	# Proteins	# Protein Groups	Activation Type	Modifications	Probability	XCorr	Δ Score	Rank	Intensity	Charge	m/z [Da]	MH+ [Da]	ΔM [ppm]	RT [min]	First Scan	Last Scan	MS Order	Ions Matched	Spectrum File	Annotation
	VETGMIKPGMVVTFAPTGLTTEVK	Q8GTY0	1	1	CID		56.0352	5.33752	1	1	4.11607e+06	2	1254.19	2507.36	412.097	69.784	24615	24615	MS2	29/69	R_Col_0_1.raw
	FHINIVVIGHVDSGK	Q8GTY0	1	1	CID		94.4791	4.72643	1	1	12766.9	2	818.343	1635.68	475.686	119.743	43092	43092	MS2	25/42	R_Col_0_1.raw
	VETGMIKPGMVVTFAPTGLTTEVK	Q8GTY0	1	1	CID		20.5333	4.65764	1	1	9581234	3	836.51	2507.52	473.331	68.5852	24146	24146	MS2	33/138	R_Col_0_1.raw
	NMITGTSQADcAVLIIDSTTGGFEAGISK	Q8GTY0	1	1	CID	C11(Carbamidomethyl)	45.6929	4.63074	1	1	677212	2	1479.44	2957.87	151.618	87.7626	31630	31630	MS2	19/84	R_Col_0_1.raw
	VETGMIKPGmVVTFAPTGLTTEVK	Q8GTY0	1	1	CID	M10(Oxidation)	18.5799	4.62114	0.102244	1	2.93613e+06	3	841.844	2523.52	472.468	63.9097	22337	22337	MS2	30/138	R_Col_0_1.raw
	FHINIVVIGHVDSGK	Q8GTY0	1	1	CID		61.5321	4.54817	1	1	11981.1	2	818.51	1636.01	679.34	123.597	44334	44334	MS2	23/42	R_Col_0_1.raw
	FHINIVVIGHVDSGK	Q8GTY0	1	1	CID		63.9337	4.35104	1	1	18089	2	818.343	1635.68	475.686	127.578	45617	45617	MS2	24/42	R_Col_0_1.raw
	VETGMIKPGMVVTFAPTGLTTEVK	Q8GTY0	1	1	CID		63.7038	4.24753	1	1	1.21653e+06	2	1254.1	2507.2	345.647	68.4193	24081	24081	MS2	22/69	R_Col_0_1.raw
	GAANFTSQVIIMNHPGQIGNGYAPVLDcHTSHIAVK	Q8GTY0	1	1	CID	C28(Carbamidomethyl)	77.9119	4.24029	1	1	766395	3	1273.27	3817.79	-25.7598	58.8803	20364	20364	MS2	37/210	R_Col_0_1.raw
	FHINIVVIGHVDSGK	Q8GTY0	1	1	CID		38.7967	4.21952	1	1	9887.11	2	818.01	1635.01	68.128	132.681	47274	47274	MS2	23/42	R_Col_0_1.raw
	VETGmIKPGMVVTFAPTGLTTEVK	Q8GTY0	1	1	CID	M5(Oxidation)	3.12979	4.14865		2	2.93613e+06	3	841.844	2523.52	472.468	63.9097	22337	22337	MS2	32/138	R_Col_0_1.raw
	FHINIVVIGHVDSGK	Q8GTY0	1	1	CID		69.164	4.08038	1	1	18743.4	2	818.427	1635.85	577.523	123.808	44401	44401	MS2	25/42	R_Col_0_1.raw
	FHINIVVIGHVDSGK	Q8GTY0	1	1	CID		39.8019	4.06754	1	1	13294.2	2	818.51	1636.01	679.34	117.113	42247	42247	MS2	23/42	R_Col_0_1.raw
	EHALLAFTLGVK	Q8GTY0	1	1	CID		25.0126	3.99568	1	1	1.58437e+06	3	433.753	1299.24	382.104	57.8517	19959	19959	MS2	32/66	R_Col_0_1.raw
	YYcTVIDAPGHR	Q8GTY0	1	1	CID	C3(Carbamidomethyl)	33.0061	3.99055	1	1	14595630	3	484.587	1451.75	49.9481	25.8304	7293	7293	MS2	28/66	R_Col_0_1.raw
	EHALLAFTLGVK	Q8GTY0	1	1	CID		17.1145	3.96714	1	1	1.63368e+06	3	433.753	1299.24	382.104	56.4582	19414	19414	MS2	32/66	R_Col_0_1.raw
	FHINIVVIGHVDSGK	Q8GTY0	1	1	CID		32.896	3.91651	1	1	18021.2	2	818.427	1635.85	577.523	110.775	40210	40210	MS2	18/42	R_Col_0_1.raw
	VETGMIKPGmVVTFAPTGLTTEVK	Q8GTY0	1	1	CID	M10(Oxidation)	1	3.89807	0.156266	1	926569	2	1262.27	2523.53	477.641	69.4433	24484	24484	MS2	19/69	R_Col_0_1.raw
	FHINIVVIGHVDSGK	Q8GTY0	1	1	CID		37.7061	3.86983	1	1	26704.5	2	818.01	1635.01	68.128	117.327	42316	42316	MS2	20/42	R_Col_0_1.raw
	YYcTVIDAPGHR	Q8GTY0	1	1	CID	C3(Carbamidomethyl)	37.6858	3.85698	1	1	7.73435e+06	2	726.842	1452.68	689.938	24.8794	6914	6914	MS2	19/33	R_Col_0_1.raw
	MTPTKPMVVETFSEYPPLGR	Q8GTY0	1	1	CID		38.2122	3.57917	1	1	20134292	3	761.092	2281.26	491.745	59.0865	20444	20444	MS2	33/114	R_Col_0_1.raw
	YDEIIKEVSSYLK	Q8GTY0	1	1	CID		22.7667	3.54767	1	1	2.31329e+06	2	794.01	1587.01	113.781	68.6801	24184	24184	MS2	16/36	R_Col_0_1.raw
	EHALLAFTLGVK	Q8GTY0	1	1	CID		45.0848	3.49845	1	1	15703.7	2	650.423	1299.84	840.758	122.698	44046	44046	MS2	18/33	R_Col_0_1.raw
	VETGmIKPGMVVTFAPTGLTTEVK	Q8GTY0	1	1	CID	M5(Oxidation)	1	3.28894		2	926569	2	1262.27	2523.53	477.641	69.4433	24484	24484	MS2	19/69	R_Col_0_1.raw
	MTPTKPMVVETFSEYPPLGR	Q8GTY0	1	1	CID		100.314	3.28586	1	1	10931795	2	1141.1	2281.19	460.954	59.7724	20714	20714	MS2	23/57	R_Col_0_1.raw
	EHALLAFTLGVK	Q8GTY0	1	1	CID		7.16998	3.28585	1	1	4657814	2	649.923	1298.84	71.4726	57.8964	19976	19976	MS2	15/33	R_Col_0_1.raw
	FHINIVVIGHVDSGK	Q8GTY0	1	1	CID		29.342	3.25641	1	1	25030.2	2	817.427	1633.85	-645.899	130.08	46428	46428	MS2	20/42	R_Col_0_1.raw
	EHALLAFTLGVK	Q8GTY0	1	1	CID		26.8908	3.2426	1	1	22447.9	2	649.923	1298.84	71.4726	111.392	40408	40408	MS2	16/33	R_Col_0_1.raw
	FHINIVVIGHVDSGK	Q8GTY0	1	1	CID		27.9021	3.20688	1	1	15943.3	2	817.843	1634.68	-135.776	115.098	41603	41603	MS2	19/42	R_Col_0_1.raw
	EHALLAFTLGVK	Q8GTY0	1	1	CID		1	3.16095	1	1	532851	1	1299.94	1299.94	914.849	58.2962	20135	20135	MS2	16/33	R_Col_0_1.raw
	STNLDWYK	Q8GTY0	1	1	CID		5.79119	2.61319	1	1	1.45249e+06	1	1026.43	1026.43	-56.8908	34.4291	10703	10703	MS2	11/21	R_Col_0_1.raw
Q9FPF0	45.92	30	392	41.831	5.41455	274.895	Protein DJ-1 homolog A OS=Arabidopsis thaliana GN=DJ1A PE=1 SV=1 - [DJ1A_ARATH]
	Sequence	Protein Accessions	# Proteins	# Protein Groups	Activation Type	Modifications	Probability	XCorr	Δ Score	Rank	Intensity	Charge	m/z [Da]	MH+ [Da]	ΔM [ppm]	RT [min]	First Scan	Last Scan	MS Order	Ions Matched	Spectrum File	Annotation
	TVLIPIAHGTEPLEAVAMITVLR	Q9FPF0	1	1	CID		93.2023	5.65018	1	1	1429926	2	1223.1	2445.2	327.351	91.2447	32986	32986	MS2	32/66	R_Col_0_1.raw
	LNAAIccAPALALGTWGLLEGK	Q9FPF0	2	1	CID	C6(Carbamidomethyl) C7(Carbamidomethyl)	48.9548	5.61001	1	1	2745160	3	767.426	2300.26	464.608	92.5313	33488	33488	MS2	37/126	R_Col_0_1.raw
	LVAEVLLDEVAEK	Q9FPF0	2	1	CID		58.5058	5.07291	1	1	11679974	2	714.508	1428.01	146.698	71.9972	25478	25478	MS2	25/36	R_Col_0_1.raw
	SFDLIVLPGGLNGAQR	Q9FPF0	2	1	CID		64.5549	4.91975	1	1	4372528	2	829.51	1658.01	667.265	76.1458	27098	27098	MS2	28/45	R_Col_0_1.raw
	TVLIPIAHGTEPLEAVAMITVLR	Q9FPF0	1	1	CID		78.4248	4.54201	1	1	2.11206e+06	3	815.843	2445.52	458.274	91.976	33272	33272	MS2	44/132	R_Col_0_1.raw
	TVLIPIAHGTEPLEAVAMITVLR	Q9FPF0	1	1	CID		106.557	4.52405	1	1	1.03198e+06	2	1222.6	2444.2	-81.6557	91.247	32987	32987	MS2	26/66	R_Col_0_1.raw
	LNAAIccAPALALGTWGLLEGK	Q9FPF0	2	1	CID	C6(Carbamidomethyl) C7(Carbamidomethyl)	93.7375	4.38447	1	1	2242363	2	1150.52	2300.03	361.637	92.58	33507	33507	MS2	27/63	R_Col_0_1.raw
	RGGADVTVASVETQVGVDAcHGIK	Q9FPF0	2	1	CID	C20(Carbamidomethyl)	37.6136	4.01984	1	1	2.89183e+06	3	809.427	2426.27	22.9284	44.8221	14818	14818	MS2	34/138	R_Col_0_1.raw
	QAEANKPYGGIcASPAYVFEPNGLLK	Q9FPF0	2	1	CID	C12(Carbamidomethyl)	57.7689	3.97363	1	1	914610	3	932.512	2795.52	406.061	65.7269	23051	23051	MS2	32/150	R_Col_0_1.raw
	LAATcATAVESR	Q9FPF0	2	1	CID	C5(Carbamidomethyl)	35.2058	3.92671	1	1	155162	2	625.923	1250.84	973.818	18.9031	4557	4557	MS2	23/33	R_Col_0_1.raw
	TVLIPIAHGTEPLEAVAMITVLR	Q9FPF0	1	1	CID		71.4958	3.88606	1	1	1.03914e+06	3	815.427	2444.27	-52.9024	92.2765	33389	33389	MS2	39/132	R_Col_0_1.raw
	LAATcATAVESR	Q9FPF0	2	1	CID	C5(Carbamidomethyl)	28.5485	3.86782	1	1	533023	2	625.756	1250.51	707.513	20.3102	5097	5097	MS2	22/33	R_Col_0_1.raw
	APGTAMEFSLAIVEK	Q9FPF0	2	1	CID		62.1068	3.85269	1	1	2.09224e+06	2	782.509	1564.01	129.53	71.2628	25191	25191	MS2	20/42	R_Col_0_1.raw
	APGTAMEFSLAIVEK	Q9FPF0	2	1	CID		19.8948	3.8461	1	1	14288.5	2	782.926	1564.84	662.006	133.894	47668	47668	MS2	20/42	R_Col_0_1.raw
	ANVVIAAVGNSLEVEGSR	Q9FPF0	2	1	CID		43.243	3.8381	1	1	1.28487e+06	2	893.178	1785.35	223.374	60.9403	21173	21173	MS2	15/51	R_Col_0_1.raw
	APGTAMEFSLAIVEK	Q9FPF0	2	1	CID		48.2759	3.80254	0.138154	1	1.23581e+06	2	783.009	1565.01	768.433	70.6353	24946	24946	MS2	18/42	R_Col_0_1.raw
	APGTAMEFSLAIVEK	Q9FPF0	2	1	CID		8.80069	3.71586	1	1	16587.7	2	782.926	1564.84	662.006	116.485	42048	42048	MS2	18/42	R_Col_0_1.raw
	LVAEVLLDEVAEK	Q9FPF0	2	1	CID		33.9758	3.6155	1	1	511980	3	477.003	1429	837.263	71.6102	25328	25328	MS2	35/72	R_Col_0_1.raw
	APGTAMEFSLAIVEK	Q9FPF0	2	1	CID		19.1318	3.54762	1	1	971228	2	782.509	1564.01	129.53	80.6055	28838	28838	MS2	16/42	R_Col_0_1.raw
	APGTAMEFSLAIVEK	Q9FPF0	2	1	CID		29.8624	3.5412	1	1	2269940	2	782.926	1564.84	662.006	69.0496	24328	24328	MS2	19/42	R_Col_0_1.raw
	SFDLIVLPGGLNGAQR	Q9FPF0	2	1	CID		49.0232	3.50962	1	1	6440294	2	829.01	1657.01	64.161	76.7913	27350	27350	MS2	24/45	R_Col_0_1.raw
	APGTAMEFSLAIVEK	Q9FPF0	2	1	CID		52.056	3.43047	1	1	34965.4	2	782.426	1563.84	22.9671	105.379	38452	38452	MS2	16/42	R_Col_0_1.raw
	VVVDGNVITSR	Q9FPF0	2	1	CID		31.2802	3.32835	1	1	22541670	2	579.839	1158.67	19.3702	29.5417	8768	8768	MS2	20/30	R_Col_0_1.raw
	APGTAMEFSLAIVEK	Q9FPF0	2	1	CID		21.6656	3.31011	1	1	17220.1	2	782.509	1564.01	129.53	130.878	46688	46688	MS2	15/42	R_Col_0_1.raw
	ANVVIAAVGNSLEVEGSR	Q9FPF0	2	1	CID		26.7506	3.24872	1	1	29281.9	2	893.511	1786.02	596.568	111.335	40390	40390	MS2	18/51	R_Col_0_1.raw
	APGTAMEFSLAIVEK	Q9FPF0	2	1	CID		5.96679	3.22449	1	1	13327.7	2	782.343	1563.68	-83.6188	120.043	43188	43188	MS2	18/42	R_Col_0_1.raw
	LVAEVLLDEVAEK	Q9FPF0	2	1	CID		19.5786	3.21147	1	1	21993.1	2	714.425	1427.84	29.9868	109.303	39737	39737	MS2	17/36	R_Col_0_1.raw
	APGTAMEFSLAIVEK	Q9FPF0	2	1	CID		6.15688	3.21021	1	1	1.41361e+06	2	782.843	1564.68	555.556	73.4859	26059	26059	MS2	18/42	R_Col_0_1.raw
	APGTAMEFSLAIVEK	Q9FPF0	2	1	CID		16.44	3.15145	1	1	1.76959e+06	2	783.009	1565.01	768.433	76.7192	27322	27322	MS2	14/42	R_Col_0_1.raw
	LVAEVLLDEVAEK	Q9FPF0	2	1	CID		37.2874	2.74142	1	1	798344	1	1427.77	1427.77	-19.2318	71.7521	25383	25383	MS2	17/36	R_Col_0_1.raw
Q9SAJ4	55.61	27	401	42.1054	5.68115	274.331	Phosphoglycerate kinase 3, cytosolic OS=Arabidopsis thaliana GN=PGK3 PE=1 SV=1 - [PGKY3_ARATH]
	Sequence	Protein Accessions	# Proteins	# Protein Groups	Activation Type	Modifications	Probability	XCorr	Δ Score	Rank	Intensity	Charge	m/z [Da]	MH+ [Da]	ΔM [ppm]	RT [min]	First Scan	Last Scan	MS Order	Ions Matched	Spectrum File	Annotation
	LVAGLPEGGVLLLENVR	Q9SAJ4	1	1	CID		105.335	5.41279	1	1	12270581	2	875.594	1750.18	659.734	81.5	29186	29186	MS2	32/48	R_Col_0_1.raw
	LSELLGVEVVMANDSIGEEVQK	Q9SAJ4	1	1	CID		48.6028	4.78839	1	1	1388293	2	1180.6	2360.19	418.272	84.0216	30171	30171	MS2	21/63	R_Col_0_1.raw
	LVAGLPEGGVLLLENVR	Q9SAJ4	1	1	CID		32.6538	4.77065	1	1	1.00811e+06	3	584.089	1750.25	699.859	81.0472	29010	29010	MS2	37/96	R_Col_0_1.raw
	FLKPSVAGFLMQK	Q9SAJ4	1	1	CID		29.9795	4.74955	1	1	1.08115e+06	3	489.67	1467	799.457	54.0273	18450	18450	MS2	34/72	R_Col_0_1.raw
	AQGLSVGSSLVEEDKLDLAK	Q9SAJ4	2	1	CID		101.679	4.45257	1	1	1.38615e+06	2	1030.01	2059.02	-34.4285	55.2955	18952	18952	MS2	20/57	R_Col_0_1.raw
	VDLNVPLDDNSNITDDTR	Q9SAJ4	1	1	CID		120.838	4.34807	1	1	6.94569e+06	2	1009.01	2017.02	529.711	56.7549	19528	19528	MS2	24/51	R_Col_0_1.raw
	GVSLLLPTDVVIADKFAPDANSK	Q9SAJ4;P50318	3	2	CID		58.1191	4.34623	1	1	734221	2	1186.1	2371.19	380.414	77.7506	27726	27726	MS2	22/66	R_Col_0_1.raw
	LAALADVYVNDAFGTAHR	Q9SAJ4	1	1	CID		30.5883	4.29703	1	1	1.20706e+06	2	953.013	1905.02	552.127	60.4018	20962	20962	MS2	20/51	R_Col_0_1.raw
	FLKPSVAGFLMQK	Q9SAJ4	1	1	CID		9.34788	4.18682	1	1	2.48778e+06	3	489.42	1466.25	288.346	55.8948	19191	19191	MS2	28/72	R_Col_0_1.raw
	GVSLLLPTDVVIADKFAPDANSK	Q9SAJ4;P50318	3	2	CID		49.6684	4.13405	1	1	1.08812e+06	2	1185.68	2370.36	28.977	78.639	28071	28071	MS2	21/66	R_Col_0_1.raw
	IVPATAIPDGWMGLDIGPDSIK	Q9SAJ4	2	1	CID		113.917	4.12459	1	1	5.23651e+06	2	1133.6	2266.19	5.61056	87.5951	31564	31564	MS2	26/63	R_Col_0_1.raw
	FYAEEEKNDPEFAKK	Q9SAJ4	1	1	CID		22.4504	4.085	1	1	164761	2	923.429	1845.85	530.905	20.7933	5288	5288	MS2	19/42	R_Col_0_1.raw
	LAALADVYVNDAFGTAHR	Q9SAJ4	1	1	CID		16.4783	4.0698	1	1	3596189	3	635.34	1904	20.343	60.8295	21128	21128	MS2	32/102	R_Col_0_1.raw
	GVTTIIGGGDSVAAVEK	Q9SAJ4;Q9LD57;P50318	4	3	CID		18.3733	3.94115	1	1	4767567	2	787.426	1573.84	1.04226	46.6908	15555	15555	MS2	21/48	R_Col_0_1.raw
	ELDYLVGAVANPK	Q9SAJ4	2	1	CID		21.9326	3.81419	1	1	4.44271e+06	2	694.924	1388.84	71.4712	55.1296	18885	18885	MS2	23/36	R_Col_0_1.raw
	LVAGLPEGGVLLLENVR	Q9SAJ4	1	1	CID		36.7957	3.72165	1	1	723292	3	583.422	1748.25	-443.362	81.1056	29033	29033	MS2	28/96	R_Col_0_1.raw
	TIIWNGPMGVFEFDKFAAGTEAVAK	Q9SAJ4	2	1	CID		99.0803	3.58606	1	1	742670	2	1350.6	2700.2	313.343	86.6936	31213	31213	MS2	18/72	R_Col_0_1.raw
	FLKPSVAGFLMQK	Q9SAJ4	1	1	CID		42.7184	3.48326	1	1	3.21765e+06	2	733.925	1466.84	694.819	54.4441	18614	18614	MS2	20/36	R_Col_0_1.raw
	AQGLSVGSSLVEEDKLDLAK	Q9SAJ4	2	1	CID		19.8102	3.45579	1	1	22363	2	1030.01	2059.02	-34.4285	120.907	43466	43466	MS2	17/57	R_Col_0_1.raw
	ELDYLVGAVANPK	Q9SAJ4	2	1	CID		9.06881	3.31884	1	1	5.89518e+06	2	695.508	1390.01	910.751	55.1274	18884	18884	MS2	18/36	R_Col_0_1.raw
	GVTTIIGGGDSVAAVEK	Q9SAJ4;Q9LD57;P50318	4	3	CID		1	3.29684	1	1	21624.3	2	788.009	1575.01	741.791	107.628	39201	39201	MS2	19/48	R_Col_0_1.raw
	AQGLSVGSSLVEEDKLDLAK	Q9SAJ4	2	1	CID		1	3.26451	1	1	16342	2	1030.01	2059.02	-34.4285	131.343	46841	46841	MS2	17/57	R_Col_0_1.raw
	TIIWNGPMGVFEFDK	Q9SAJ4	2	1	CID		47.2814	3.14605	1	1	1.01465e+06	2	878.011	1755.02	657.078	87.4303	31500	31500	MS2	19/42	R_Col_0_1.raw
	TIIWNGPMGVFEFDK	Q9SAJ4	2	1	CID		34.0621	3.12537	1	1	2.17811e+06	2	877.428	1753.85	-7.702	85.6592	30810	30810	MS2	12/42	R_Col_0_1.raw
	AQGLSVGSSLVEEDKLDLAK	Q9SAJ4	2	1	CID		35.9119	3.11462	1	1	17642.6	2	1030.35	2059.69	289.263	116.548	42068	42068	MS2	15/57	R_Col_0_1.raw
	GVSLLLPTDVVIADK	Q9SAJ4;P50318	3	2	CID		2.13606	3.06084	1	1	1.07049e+06	2	771.009	1541.01	721.359	76.4745	27226	27226	MS2	20/42	R_Col_0_1.raw
	ELDYLVGAVANPK	Q9SAJ4	2	1	CID		53.1081	2.97296	1	1	1.51611e+06	1	1388.77	1388.77	20.8724	54.061	18463	18463	MS2	17/36	R_Col_0_1.raw
O04314	76.85	29	298	32.1383	5.77002	261.815	PYK10-binding protein 1 OS=Arabidopsis thaliana GN=PBP1 PE=1 SV=1 - [JAL30_ARATH]
	Sequence	Protein Accessions	# Proteins	# Protein Groups	Activation Type	Modifications	Probability	XCorr	Δ Score	Rank	Intensity	Charge	m/z [Da]	MH+ [Da]	ΔM [ppm]	RT [min]	First Scan	Last Scan	MS Order	Ions Matched	Spectrum File	Annotation
	IIGFHGSAGGNLNSLGAYFAPLTTTTPLTPAK	O04314	2	1	CID		102.801	5.5635	1	1	643253	2	1594.94	3188.88	375.489	83.0532	29793	29793	MS2	29/93	R_Col_0_1.raw
	VLPADPFVINHPDEHLVSVEGWYSPEGIIQGIK	O04314	1	1	CID		43.2486	5.55343	1	1	1.21838e+06	3	1219.6	3656.79	248.616	87.4112	31492	31492	MS2	36/192	R_Col_0_1.raw
	GANLWDDGSTHDAVTK	O04314	2	1	CID		41.9345	5.38064	1	1	9782511	2	844.427	1687.85	637.045	28.9093	8518	8518	MS2	25/45	R_Col_0_1.raw
	IIGFHGSAGGNLNSLGAYFAPLTTTTPLTPAK	O04314	2	1	CID		66.9206	5.0327	1	1	2.72127e+06	3	1063.68	3189.03	423.639	84.5441	30374	30374	MS2	37/186	R_Col_0_1.raw
	VLPADPFVINHPDEHLVSVEGWYSPEGIIQGIK	O04314	1	1	CID		55.1983	4.99766	1	1	3364011	3	1219.6	3656.79	248.616	86.0191	30950	30950	MS2	40/192	R_Col_0_1.raw
	TSDVIGSDEGTHFTLQVK	O04314	1	1	CID		78.785	4.88971	1	1	1.91124e+06	2	967.513	1934.02	35.3168	47.2641	15782	15782	MS2	25/51	R_Col_0_1.raw
	QLTAFGSDDGTVWDDGAYVGVK	O04314	2	1	CID		53.7393	4.74826	1	1	1.7595e+06	2	1151.1	2301.19	54.4159	71.7215	25370	25370	MS2	21/63	R_Col_0_1.raw
	IQLAAGIDGIQYVQFDYVK	O04314	2	1	CID		53.4772	4.74078	1	1	23143.7	2	1071.76	2142.52	650.992	107.799	39255	39255	MS2	27/54	R_Col_0_1.raw
	VLPADPFVINHPDEHLVSVEGWYSPEGIIQGIK	O04314	1	1	CID		32.0046	4.68019	1	1	991528	3	1219.18	3655.54	-93.253	87.5688	31554	31554	MS2	33/192	R_Col_0_1.raw
	QLTAFGSDDGTVWDDGAYVGVK	O04314	2	1	CID		103.906	4.60693	1	1	958578	2	1151.1	2301.19	54.4159	70.3247	24827	24827	MS2	24/63	R_Col_0_1.raw
	KVYVGQAQDGISAVK	O04314	3	1	CID		59.0904	4.57525	1	1	5.35328e+06	2	782.009	1563.01	100.842	23.8369	6500	6500	MS2	28/42	R_Col_0_1.raw
	QLTAFGSDDGTVWDDGAYVGVK	O04314	2	1	CID		95.343	4.42025	1	1	753430	2	1151.6	2302.19	488.769	70.0856	24734	24734	MS2	21/63	R_Col_0_1.raw
	IQLAAGIDGIQYVQFDYVK	O04314	2	1	CID		34.9349	4.36916	1	1	717710	2	1071.76	2142.52	650.992	86.1838	31015	31015	MS2	19/54	R_Col_0_1.raw
	FVYDKSPEEVTGEEHGK	O04314	3	1	CID		33.4854	4.2812	1	1	694059	2	976.43	1951.85	483.736	23.4634	6352	6352	MS2	20/48	R_Col_0_1.raw
	IFGSDGSVITMLR	O04314	3	1	CID		40.6697	4.13898	1	1	2.54622e+06	2	698.924	1396.84	795.614	68.7269	24202	24202	MS2	23/36	R_Col_0_1.raw
	VYVGQAQDGISAVK	O04314	3	1	CID		80.3551	4.10212	1	1	46951912	2	717.925	1434.84	58.154	31.1797	9416	9416	MS2	28/39	R_Col_0_1.raw
	TSDVIGSDEGTHFTLQVK	O04314	1	1	CID		64.9945	4.03663	1	1	21515.6	2	967.513	1934.02	35.3168	123.911	44434	44434	MS2	23/51	R_Col_0_1.raw
	IQLAAGIDGIQYVQFDYVK	O04314	2	1	CID		35.9989	3.87283	1	1	31150.6	2	1070.93	2140.86	-127.021	130.316	46505	46505	MS2	24/54	R_Col_0_1.raw
	IQLAAGIDGIQYVQFDYVK	O04314	2	1	CID		11.3733	3.8556	1	1	5730.29	2	1071.51	2142.02	417.716	126.521	45274	45274	MS2	22/54	R_Col_0_1.raw
	QTSPPFGLEAGTVFELK	O04314	2	1	CID		52.1913	3.8016	1	1	4.54489e+06	2	911.095	1821.18	131.809	76.4698	27224	27224	MS2	20/48	R_Col_0_1.raw
	FVYDKSPEEVTGEEHGK	O04314	3	1	CID		115.839	3.72455	1	1	443324	2	975.93	1950.85	-28.6223	22.0589	5792	5792	MS2	21/48	R_Col_0_1.raw
	FVYDKSPEEVTGEEHGK	O04314	3	1	CID		52.7674	3.71398	1	1	5391861	3	651.34	1952.01	562.392	23.1649	6230	6230	MS2	30/96	R_Col_0_1.raw
	QLTAFGSDDGTVWDDGAYVGVK	O04314	2	1	CID		76.5139	3.61212	1	1	719185	2	1151.52	2302.03	416.403	73.6024	26105	26105	MS2	20/63	R_Col_0_1.raw
	STLLGFEEFVLDYPSEYITAVDGTYDK	O04314	2	1	CID		70.6648	3.48784	1	1	69600.5	2	1536.61	3072.21	-82.7047	105.716	38569	38569	MS2	21/78	R_Col_0_1.raw
	TSDVIGSDEGTHFTLQVK	O04314	1	1	CID		45.5157	3.46403	1	1	12943.4	2	967.93	1934.85	466.006	126.173	45163	45163	MS2	24/51	R_Col_0_1.raw
	QTSPPFGLEAGTVFELK	O04314	2	1	CID		72.6772	3.38345	1	1	2.51833e+06	2	910.928	1820.85	-51.2356	77.2513	27531	27531	MS2	20/48	R_Col_0_1.raw
	FVYDKSPEEVTGEEHGK	O04314	3	1	CID		54.2512	3.22484	1	1	484993	2	975.763	1950.52	-199.525	23.8268	6498	6498	MS2	16/48	R_Col_0_1.raw
	TSDVIGSDEGTHFTLQVK	O04314	1	1	CID		26.7362	3.11836	1	1	16952.1	2	967.013	1933.02	-482.001	114.465	41402	41402	MS2	19/51	R_Col_0_1.raw
	VYVGQAQDGISAVK	O04314	3	1	CID		36.5065	2.77243	1	1	1.82588e+06	1	1434.69	1434.69	-48.9083	30.9243	9317	9317	MS2	15/39	R_Col_0_1.raw
Q9SRZ6	44.63	32	410	45.7171	6.56592	253.868	Cytosolic isocitrate dehydrogenase [NADP] OS=Arabidopsis thaliana GN=CICDH PE=2 SV=1 - [ICDHC_ARATH]
	Sequence	Protein Accessions	# Proteins	# Protein Groups	Activation Type	Modifications	Probability	XCorr	Δ Score	Rank	Intensity	Charge	m/z [Da]	MH+ [Da]	ΔM [ppm]	RT [min]	First Scan	Last Scan	MS Order	Ions Matched	Spectrum File	Annotation
	DTYLNTEEFIDAVAAELK	Q9SRZ6	1	1	CID		103.629	5.9272	1	1	2.90716e+06	2	1021.6	2042.19	93.4156	102.46	37376	37376	MS2	27/51	R_Col_0_1.raw
	DATDDKVTIESAEATKK	Q9SRZ6	1	1	CID		99.3719	5.39006	1	1	667430	3	608.256	1822.75	463.92	19.6125	4826	4826	MS2	39/96	R_Col_0_1.raw
	DATDDKVTIESAEATKK	Q9SRZ6	1	1	CID		74.5221	5.0511	1	1	111992	2	911.345	1821.68	-123.338	19.5348	4798	4798	MS2	24/48	R_Col_0_1.raw
	GGETSTNSIASIFAWTR	Q9SRZ6	1	1	CID		65.2713	4.95764	1	1	4794904	2	899.428	1797.85	-15.2611	77.7131	27710	27710	MS2	23/48	R_Col_0_1.raw
	DTYLNTEEFIDAVAAELK	Q9SRZ6	1	1	CID		77.2009	4.54152	1	1	102463	3	681.674	2043.01	494.889	103.132	37637	37637	MS2	31/102	R_Col_0_1.raw
	FKDIFQEVYEASWK	Q9SRZ6	1	1	CID		68.091	4.5044	1	1	2.59955e+06	3	597.672	1791	627.072	73.0118	25875	25875	MS2	34/78	R_Col_0_1.raw
	DTYLNTEEFIDAVAAELKER	Q9SRZ6	1	1	CID		74.6969	4.50298	1	1	1.23762e+06	2	1164.1	2327.19	22.5871	95.7149	34732	34732	MS2	19/57	R_Col_0_1.raw
	LIDDMVAYALK	Q9SRZ6	1	1	CID		46.6222	4.49155	1	1	109680	2	626.84	1252.67	803.588	67.0794	23560	23560	MS2	23/30	R_Col_0_1.raw
	FKDIFQEVYEASWK	Q9SRZ6	1	1	CID		46.8277	4.4768	1	1	4411741	2	895.928	1790.85	541.351	73.1964	25946	25946	MS2	21/39	R_Col_0_1.raw
	FKDIFQEVYEASWK	Q9SRZ6	1	1	CID		58.8014	4.42371	1	1	1384397	3	597.339	1790	68.7531	73.7233	26152	26152	MS2	35/78	R_Col_0_1.raw
	VANPIVEMDGDEMTR	Q9SRZ6	1	1	CID		70.7218	4.30955	1	1	17533932	2	838.927	1676.85	50.668	49.6055	16706	16706	MS2	23/42	R_Col_0_1.raw
	DATDDKVTIESAEATK	Q9SRZ6	1	1	CID		80.0275	4.21394	1	1	1.95044e+06	2	847.427	1693.85	20.3568	23.8434	6503	6503	MS2	21/45	R_Col_0_1.raw
	NILNGTVFREPIIcK	Q9SRZ6	1	1	CID	C14(Carbamidomethyl)	78.2788	4.18472	1	1	3653915	2	887.511	1774.02	26.6991	56.3379	19365	19365	MS2	24/42	R_Col_0_1.raw
	AFADASMNTAYEKK	Q9SRZ6	1	1	CID		25.5519	4.15408	1	1	833934	2	773.842	1546.68	-27.7833	22.8615	6110	6110	MS2	21/39	R_Col_0_1.raw
	DTYLNTEEFIDAVAAELK	Q9SRZ6	1	1	CID		63.2619	4.13062	1	1	917338	3	681.507	2042.51	250.208	101.728	37089	37089	MS2	27/102	R_Col_0_1.raw
	GGETSTNSIASIFAWTR	Q9SRZ6	1	1	CID		80.0252	4.11156	1	1	1.06743e+06	3	600.339	1799	626.009	78.0428	27839	27839	MS2	32/96	R_Col_0_1.raw
	LEAAcVGTVESGK	Q9SRZ6	1	1	CID	C5(Carbamidomethyl)	74.602	4.10165	1	1	12955677	2	660.84	1320.67	20.3555	23.5214	6374	6374	MS2	25/36	R_Col_0_1.raw
	SKYDAAGIWYEHR	Q9SRZ6	1	1	CID		78.9178	3.89146	1	1	3.36096e+06	2	798.426	1595.85	53.3735	28.508	8358	8358	MS2	24/36	R_Col_0_1.raw
	TIEAEAAHGTVTR	Q9SRZ6	2	1	CID		65.612	3.81702	1	1	23065.6	2	678.757	1356.51	601.503	15.1072	3240	3240	MS2	24/36	R_Col_0_1.raw
	AFADASMNTAYEK	Q9SRZ6	1	1	CID		6.55732	3.79044	1	1	6.35644e+06	2	710.341	1419.68	739.283	29.8656	8896	8896	MS2	21/36	R_Col_0_1.raw
	TIEAEAAHGTVTR	Q9SRZ6	2	1	CID		57.4077	3.63141	1	1	19712.6	2	678.257	1355.51	-135.799	15.3468	3322	3322	MS2	23/36	R_Col_0_1.raw
	DATDDKVTIESAEATK	Q9SRZ6	1	1	CID		29.2379	3.56904	1	1	1.30288e+06	2	848.011	1695.01	708.649	23.6251	6417	6417	MS2	20/45	R_Col_0_1.raw
	VANPIVEMDGDEMTR	Q9SRZ6	1	1	CID		22.3948	3.53432	1	1	2.44528e+06	2	839.594	1678.18	845.155	51.032	17268	17268	MS2	16/42	R_Col_0_1.raw
	NILNGTVFREPIIcK	Q9SRZ6	1	1	CID	C14(Carbamidomethyl)	3.52238	3.45827	1	1	3.39848e+06	2	888.011	1775.02	590.07	55.7979	19152	19152	MS2	20/42	R_Col_0_1.raw
	LEAAcVGTVESGK	Q9SRZ6	1	1	CID	C5(Carbamidomethyl)	58.346	3.44801	1	1	2.63832e+06	2	660.34	1319.67	-737.407	23.9384	6540	6540	MS2	20/36	R_Col_0_1.raw
	AFADASMNTAYEKK	Q9SRZ6	1	1	CID		46.457	3.4228	1	1	809192	2	773.342	1545.68	-674.779	23.1455	6224	6224	MS2	20/39	R_Col_0_1.raw
	VANPIVEMDGDEMTR	Q9SRZ6	1	1	CID		7.20236	3.41283	1	1	1.58121e+06	2	839.344	1677.68	547.37	48.8416	16405	16405	MS2	16/42	R_Col_0_1.raw
	DLALIIHGSK	Q9SRZ6	1	1	CID		23.7326	3.17631	1	1	5657120	2	533.838	1066.67	40.1851	35.9549	11307	11307	MS2	19/27	R_Col_0_1.raw
	AFADASMNTAYEK	Q9SRZ6	1	1	CID		76.8753	2.91932	1	1	963160	1	1418.52	1418.52	-73.3775	30.3959	9108	9108	MS2	15/36	R_Col_0_1.raw
	LITPFVELDIK	Q9SRZ6	1	1	CID		30.8068	2.59958	1	1	1.10725e+06	1	1287.94	1287.94	139.637	76.2207	27128	27128	MS2	13/30	R_Col_0_1.raw
	LEAAcVGTVESGK	Q9SRZ6	1	1	CID	C5(Carbamidomethyl)	1	2.5625	1	1	518384	1	1321.52	1321.52	660.824	23.014	6172	6172	MS2	11/36	R_Col_0_1.raw
	DLALIIHGSK	Q9SRZ6	1	1	CID		18.6918	2.54085	1	1	835611	1	1066.68	1066.68	52.428	36.1214	11375	11375	MS2	14/27	R_Col_0_1.raw
O23255	40.21	22	485	53.3441	5.97314	252.692	Adenosylhomocysteinase 1 OS=Arabidopsis thaliana GN=SAHH1 PE=1 SV=1 - [SAHH1_ARATH]
	Sequence	Protein Accessions	# Proteins	# Protein Groups	Activation Type	Modifications	Probability	XCorr	Δ Score	Rank	Intensity	Charge	m/z [Da]	MH+ [Da]	ΔM [ppm]	RT [min]	First Scan	Last Scan	MS Order	Ions Matched	Spectrum File	Annotation
	TGQVPDPTSTDNPEFQIVLSIIK	O23255	1	1	CID		89.1209	5.07714	1	1	3346682	3	833.76	2499.27	-12.5651	94.9707	34442	34442	MS2	38/132	R_Col_0_1.raw
	WcScNIFSTQDHAAAAIAR	O23255;Q9LK36	2	2	CID	C2(Carbamidomethyl) C4(Carbamidomethyl)	69.6785	4.9435	1	1	1.04634e+06	2	1089.85	2178.69	-133.528	48.4544	16253	16253	MS2	26/54	R_Col_0_1.raw
	LELELAEVEMPGLMAcR	O23255	1	1	CID	C16(Carbamidomethyl)	107.531	4.80281	1	1	3.1374e+06	2	981.097	1961.19	118.062	83.7609	30068	30068	MS2	27/48	R_Col_0_1.raw
	NNAIVcNIGHFDNEIDMLGLETYPGVKR	O23255;Q9LK36	2	2	CID	C6(Carbamidomethyl)	42.6109	4.68183	1	1	764137	3	1063.51	3188.53	-318.635	76.2662	27146	27146	MS2	29/162	R_Col_0_1.raw
	TGQVPDPTSTDNPEFQIVLSIIK	O23255	1	1	CID		68.2338	4.64663	1	1	1.65594e+06	2	1250.6	2500.2	359.308	94.8325	34388	34388	MS2	24/66	R_Col_0_1.raw
	TGQVPDPTSTDNPEFQIVLSIIK	O23255	1	1	CID		94.3601	4.4242	1	1	2.2071e+06	2	1250.52	2500.03	292.665	96.2444	34940	34940	MS2	25/66	R_Col_0_1.raw
	LYQMQQNGTLLFPAINVNDSVTK	O23255	1	1	CID		34.2527	4.23784	1	1	3.04296e+06	3	865.761	2595.27	362.149	78.3124	27944	27944	MS2	32/132	R_Col_0_1.raw
	AGIIVLAEGR	O23255	1	1	CID		38.1205	4.08349	1	1	4163199	2	500.421	999.834	1234.64	40.8731	13257	13257	MS2	20/27	R_Col_0_1.raw
	NNAIVcNIGHFDNEIDMLGLETYPGVK	O23255;Q9LK36	2	2	CID	C6(Carbamidomethyl)	10.6364	3.97118	1	1	4952472	3	1012.26	3034.78	438.968	83.2087	29852	29852	MS2	36/156	R_Col_0_1.raw
	LYQMQQNGTLLFPAINVNDSVTK	O23255	1	1	CID		42.7478	3.95187	1	1	1.54111e+06	2	1298.02	2595.03	270.875	78.5947	28054	28054	MS2	26/66	R_Col_0_1.raw
	TGQVPDPTSTDNPEFQIVLSIIK	O23255	1	1	CID		82.9767	3.82666	1	1	1.21035e+06	2	1250.1	2499.2	-40.6846	96.2493	34942	34942	MS2	22/66	R_Col_0_1.raw
	AGIIVLAEGR	O23255	1	1	CID		13.5836	3.77427	1	1	4.18734e+06	2	499.837	998.667	67.8394	39.5033	12715	12715	MS2	19/27	R_Col_0_1.raw
	ALDWGPGGGPDLIVDDGGDATLLIHEGVK	O23255;Q9LK36	2	2	CID		44.068	3.70893	1	1	1.04483e+06	3	963.179	2887.52	26.5022	83.1406	29827	29827	MS2	36/168	R_Col_0_1.raw
	VAVIcGYGDVGK	O23255;Q9LK36	2	2	CID	C5(Carbamidomethyl)	51.3876	3.69173	1	1	24940842	2	619.34	1237.67	38.0938	34.364	10676	10676	MS2	20/33	R_Col_0_1.raw
	NNAIVcNIGHFDNEIDMLGLETYPGVK	O23255;Q9LK36	2	2	CID	C6(Carbamidomethyl)	68.4269	3.68498	1	1	775083	2	1517.61	3034.21	251.099	82.7289	29666	29666	MS2	22/78	R_Col_0_1.raw
	AGIIVLAEGR	O23255	1	1	CID		17.6971	3.64064	1	1	2983826	2	499.921	998.834	234.693	41.5683	13532	13532	MS2	20/27	R_Col_0_1.raw
	LVGVSEETTTGVKR	O23255;Q9LK36	2	2	CID		82.1791	3.62233	1	1	1.57281e+06	2	738.342	1475.68	-88.1799	20.2643	5079	5079	MS2	23/39	R_Col_0_1.raw
	LYQMQQNGTLLFPAINVNDSVTK	O23255	1	1	CID		33.4628	3.38409	1	1	1.09073e+06	2	1297.69	2594.36	13.972	77.1827	27505	27505	MS2	19/66	R_Col_0_1.raw
	LVGVSEETTTGVK	O23255;Q9LK36	2	2	CID		22.5101	3.19552	1	1	14331344	2	660.424	1319.84	102.018	25.9626	7346	7346	MS2	20/36	R_Col_0_1.raw
	DQSDYVSIPIEGPYKPPHYR	O23255	1	1	CID		9.4354	3.13789	1	1	1.10994e+06	2	1181.68	2362.36	511.823	51.2395	17351	17351	MS2	17/57	R_Col_0_1.raw
	DQSDYVSIPIEGPYKPPHYR	O23255	1	1	CID		23.3195	3.0923	1	1	882860	2	1181.27	2361.53	159.118	51.4576	17437	17437	MS2	17/57	R_Col_0_1.raw
	LVGVSEETTTGVK	O23255;Q9LK36	2	2	CID		19.0007	2.78582	1	1	1.138e+06	1	1319.85	1319.85	111.912	25.4994	7164	7164	MS2	14/36	R_Col_0_1.raw
O23654	47.83	28	623	68.7688	5.23682	248.056	V-type proton ATPase catalytic subunit A OS=Arabidopsis thaliana GN=VHA-A PE=1 SV=1 - [VATA_ARATH]
	Sequence	Protein Accessions	# Proteins	# Protein Groups	Activation Type	Modifications	Probability	XCorr	Δ Score	Rank	Intensity	Charge	m/z [Da]	MH+ [Da]	ΔM [ppm]	RT [min]	First Scan	Last Scan	MS Order	Ions Matched	Spectrum File	Annotation
	VSGPVVVADGMAGAAMYELVR	O23654	1	1	CID		129.59	5.41776	1	1	1.96455e+06	2	1047.01	2093.02	461.022	85.2376	30645	30645	MS2	31/60	R_Col_0_1.raw
	VLDALFPSVLGGTcAIPGAFGcGK	O23654	1	1	CID	C14(Carbamidomethyl) C22(Carbamidomethyl)	97.6284	5.40604	1	1	1.44319e+06	2	1204.1	2407.19	-8.56857	90.5181	32702	32702	MS2	28/69	R_Col_0_1.raw
	GVSVPALDKDcLWEFQPNK	O23654	1	1	CID	C11(Carbamidomethyl)	58.3593	4.81529	1	1	630955	2	1102.6	2204.19	501.368	65.5776	22993	22993	MS2	21/54	R_Col_0_1.raw
	VSGPVVVADGMAGAAMYELVR	O23654	1	1	CID		27.7902	4.71888	1	1	876978	2	1047.26	2093.52	699.748	86.628	31187	31187	MS2	23/60	R_Col_0_1.raw
	DALAEGDKITLETAK	O23654	1	1	CID		51.6185	4.5687	1	1	2799435	2	787.843	1574.68	-94.6353	36.1888	11401	11401	MS2	20/42	R_Col_0_1.raw
	VSGPVVVADGMAGAAMYELVR	O23654	1	1	CID		33.6727	4.51101	1	1	802773	3	698.341	2093.01	454.785	85.1007	30591	30591	MS2	40/120	R_Col_0_1.raw
	TTLVANTSNMPVAAR	O23654	1	1	CID		33.5364	4.37183	1	1	11905152	2	773.426	1545.84	25.1893	35.0025	10928	10928	MS2	25/42	R_Col_0_1.raw
	LTTFEDDEKESEYGYVR	O23654	1	1	CID		61.926	4.17795	1	1	2.13494e+06	2	1040.93	2080.85	-38.4089	38.6097	12360	12360	MS2	22/48	R_Col_0_1.raw
	VLDALFPSVLGGTcAIPGAFGcGK	O23654	1	1	CID	C14(Carbamidomethyl) C22(Carbamidomethyl)	1.99842	4.10202	1	1	778883	2	1204.68	2408.36	475.868	90.2603	32602	32602	MS2	21/69	R_Col_0_1.raw
	DALAEGDKITLETAK	O23654	1	1	CID		74.7631	4.04138	1	1	4.04843e+06	2	788.426	1575.84	645.793	35.6945	11202	11202	MS2	20/42	R_Col_0_1.raw
	FEDPAEGEDTLVEK	O23654	1	1	CID		62.2582	3.96517	1	1	8647699	2	790.343	1579.68	608.539	40.3112	13034	13034	MS2	27/39	R_Col_0_1.raw
	GNEMAEVLMDFPQLTMTLPDGR	O23654	1	1	CID		37.2815	3.89635	1	1	953068	2	1233.6	2466.2	423.496	98.2867	35740	35740	MS2	19/63	R_Col_0_1.raw
	LLREDYLAQNAFTPYDK	O23654	1	1	CID		41.0924	3.80328	1	1	1.43656e+06	2	1029.51	2058.02	479.607	53.6543	18302	18302	MS2	25/48	R_Col_0_1.raw
	GNEMAEVLMDFPQLTMTLPDGR	O23654	1	1	CID		61.0183	3.71287	1	1	581615	2	1232.93	2464.86	-117.222	98.3789	35776	35776	MS2	22/63	R_Col_0_1.raw
	EVLQREDDLNEIVQLVGK	O23654	1	1	CID		33.0625	3.70419	1	1	2148982	3	700.091	2098.26	543.274	70.1041	24740	24740	MS2	30/102	R_Col_0_1.raw
	LLREDYLAQNAFTPYDK	O23654	1	1	CID		66.4205	3.70014	1	1	1.3956e+06	2	1029.01	2057.02	-6.30898	53.8888	18394	18394	MS2	23/48	R_Col_0_1.raw
	GVSVPALDKDcLWEFQPNK	O23654	1	1	CID	C11(Carbamidomethyl)	50.0006	3.69808	1	1	733521	2	1101.93	2202.86	-103.614	65.6211	23010	23010	MS2	19/54	R_Col_0_1.raw
	NIIHFYNLANQAVER	O23654	1	1	CID		58.6219	3.69453	1	1	928436	2	900.845	1800.68	-695.191	52.6544	17909	17909	MS2	21/42	R_Col_0_1.raw
	LAADTPLLTGQR	O23654	1	1	CID		49.1504	3.64602	1	1	17419646	2	628.423	1255.84	110.062	36.4043	11486	11486	MS2	20/33	R_Col_0_1.raw
	FEDPAEGEDTLVEK	O23654	1	1	CID		62.4064	3.58183	1	1	3150450	2	789.843	1578.68	-24.5286	40.9532	13288	13288	MS2	24/39	R_Col_0_1.raw
	YSTALESFYEKFDPDFINIR	O23654	1	1	CID		12.133	3.55248	1	1	722480	2	1228.6	2456.2	412.675	85.3975	30708	30708	MS2	15/57	R_Col_0_1.raw
	LEGDSATIQVYEETAGLTVNDPVLR	O23654	1	1	CID		26.2086	3.53933	1	1	813424	2	1346.35	2691.7	500.73	81.2587	29093	29093	MS2	18/72	R_Col_0_1.raw
	VSGPVVVADGMAGAAMYELVR	O23654	1	1	CID		1	3.48502	1	1	710018	2	1046.6	2092.19	62.8907	86.8633	31279	31279	MS2	19/60	R_Col_0_1.raw
	LVSQKFEDPAEGEDTLVEK	O23654	1	1	CID		23.1455	3.20871	1	1	1.22493e+06	2	1067.51	2134.02	-15.3318	40.4677	13098	13098	MS2	18/54	R_Col_0_1.raw
	DMGYNVSMMADSTSR	O23654	1	1	CID		33.4873	3.17713	1	1	3.14435e+06	2	832.927	1664.85	105.283	49.8915	16819	16819	MS2	15/42	R_Col_0_1.raw
	YSNSDAVVYVGcGER	O23654	1	1	CID	C12(Carbamidomethyl)	13.6448	3.17073	1	1	7.67601e+06	2	838.427	1675.85	64.904	32.7737	10047	10047	MS2	16/42	R_Col_0_1.raw
	ISGDVYIPR	O23654	1	1	CID		27.1643	3.13774	1	1	4.15472e+06	2	510.837	1020.67	1092.9	33.2754	10247	10247	MS2	19/24	R_Col_0_1.raw
	EDYLAQNAFTPYDK	O23654	1	1	CID		34.4835	3.07752	1	1	3.15364e+06	2	838.427	1675.85	645.789	53.309	18166	18166	MS2	14/39	R_Col_0_1.raw
P92549	26.43	19	507	55.0108	6.60986	246.13	ATP synthase subunit alpha, mitochondrial OS=Arabidopsis thaliana GN=ATPA PE=1 SV=2 - [ATPAM_ARATH]
	Sequence	Protein Accessions	# Proteins	# Protein Groups	Activation Type	Modifications	Probability	XCorr	Δ Score	Rank	Intensity	Charge	m/z [Da]	MH+ [Da]	ΔM [ppm]	RT [min]	First Scan	Last Scan	MS Order	Ions Matched	Spectrum File	Annotation
	EVAAFAQFGSDLDAATQALLNR	P92549	1	1	CID		113.133	6.26014	1	1	1.76499e+06	2	1155.1	2309.19	448.445	98.3277	35756	35756	MS2	28/63	R_Col_0_1.raw
	EVAAFAQFGSDLDAATQALLNR	P92549	1	1	CID		113.779	6.0663	1	1	1.92622e+06	2	1154.68	2308.36	87.5933	98.4198	35792	35792	MS2	28/63	R_Col_0_1.raw
	VVSVGDGIAQVYGLNEIQAGEMVLFANGVK	P92549	1	1	CID		92.4076	5.96998	1	1	2.19209e+06	3	1026.85	3078.53	302.047	97.8685	35576	35576	MS2	41/174	R_Col_0_1.raw
	EVAAFAQFGSDLDAATQALLNR	P92549	1	1	CID		90.9555	4.95354	1	1	4659727	3	770.426	2309.26	478.863	98.1445	35684	35684	MS2	43/126	R_Col_0_1.raw
	LTEVLKQPQYAPLPIEK	P92549	1	1	CID		13.2406	4.73678	1	1	6950526	3	656.757	1968.26	576.59	50.4769	17048	17048	MS2	27/96	R_Col_0_1.raw
	VVSVGDGIAQVYGLNEIQAGEMVLFANGVK	P92549	1	1	CID		45.5656	4.30945	1	1	815337	2	1539.94	3078.87	414.522	97.9631	35613	35613	MS2	22/87	R_Col_0_1.raw
	LTEVLKQPQYAPLPIEK	P92549	1	1	CID		30.5464	4.17463	1	1	2.05963e+06	2	984.013	1967.02	-51.9001	50.1722	16929	16929	MS2	21/48	R_Col_0_1.raw
	TTIAIDTILNQK	P92549	1	1	CID		69.0316	4.17249	1	1	9428037	2	666.007	1331.01	187.204	56.933	19598	19598	MS2	20/33	R_Col_0_1.raw
	DNGMHALIIYDDLSK	P92549	1	1	CID		60.9224	4.03736	1	1	3229581	2	852.927	1704.85	12.4493	60.7404	21093	21093	MS2	16/42	R_Col_0_1.raw
	EVAAFAQFGSDLDAATQALLNR	P92549	1	1	CID		81.7893	3.89061	1	1	730851	2	1153.85	2306.69	-634.893	98.5217	35832	35832	MS2	22/63	R_Col_0_1.raw
	VVDAMGVPIDGK	P92549	1	1	CID		53.9842	3.7762	1	1	7.13396e+06	2	601.422	1201.84	1005.41	39.4947	12711	12711	MS2	21/33	R_Col_0_1.raw
	AILNSVKPELLQALK	P92549	1	1	CID		32.9366	3.62396	1	1	2.94571e+06	2	819.51	1638.01	618.504	60.6033	21039	21039	MS2	16/42	R_Col_0_1.raw
	VVSVGDGIAQVYGLNEIQAGEMVLFANGVK	P92549	1	1	CID		9.9508	3.59696	1	1	709349	3	1026.43	3077.28	-104.041	98.0833	35661	35661	MS2	31/174	R_Col_0_1.raw
	EVAAFAQFGSDLDAATQALLNR	P92549	1	1	CID		23.4723	3.55024	1	1	716829	2	1154.93	2308.86	304.136	100.095	36448	36448	MS2	18/63	R_Col_0_1.raw
	AAELTNLFESR	P92549	1	1	CID		41.5541	3.14909	1	1	1.91348e+06	2	625.09	1249.17	-1173.29	52.8104	17970	17970	MS2	20/30	R_Col_0_1.raw
	AILNSVKPELLQALK	P92549	1	1	CID		58.3728	3.12216	1	1	950709	2	818.427	1635.85	-705.195	59.2946	20526	20526	MS2	17/42	R_Col_0_1.raw
	AILNSVKPELLQALK	P92549	1	1	CID		16.3005	3.10448	1	1	1.27236e+06	2	819.01	1637.01	8.00163	59.0659	20437	20437	MS2	15/42	R_Col_0_1.raw
	AAELTNLFESR	P92549	1	1	CID		15.2705	2.70954	1	1	1867129	1	1250.69	1250.69	37.9415	52.6567	17910	17910	MS2	13/30	R_Col_0_1.raw
	TTIAIDTILNQK	P92549	1	1	CID		42.838	2.69401	1	1	1.42524e+06	1	1330.69	1330.69	-53.4384	57.3998	19784	19784	MS2	14/33	R_Col_0_1.raw
Q39043	22.01	17	668	73.5159	5.21143	244.04	Mediator of RNA polymerase II transcription subunit 37f OS=Arabidopsis thaliana GN=MED37F PE=1 SV=2 - [MD37F_ARATH]
	Sequence	Protein Accessions	# Proteins	# Protein Groups	Activation Type	Modifications	Probability	XCorr	Δ Score	Rank	Intensity	Charge	m/z [Da]	MH+ [Da]	ΔM [ppm]	RT [min]	First Scan	Last Scan	MS Order	Ions Matched	Spectrum File	Annotation
	LKEVEAVcNPIITAVYQR	Q39043;Q9LKR3	2	2	CID	C8(Carbamidomethyl)	62.2926	5.38603	1	1	850050	2	1052.68	2104.36	583.74	58.282	20129	20129	MS2	26/51	R_Col_0_1.raw
	IINEPTAAAIAYGLDK	O65719;Q39043;P22953;P22954;Q9LKR3;Q9LHA8;Q9S9N1	8	7	CID		59.1437	5.12424	1	1	7779391	2	831.01	1661.01	673.067	59.1819	20481	20481	MS2	25/45	R_Col_0_1.raw
	SGGAPGAGGESSTEEEDESHDEL	Q39043	1	1	CID		108.872	4.81291	1	1	1.23465e+06	2	1123.93	2246.86	-10.0374	24.7221	6853	6853	MS2	32/66	R_Col_0_1.raw
	IINEPTAAAIAYGLDKK	O65719;Q39043;P22953;P22954;Q9LKR3;Q9LHA8;Q9S9N1	8	7	CID		57.9592	4.73409	1	1	6.53207e+06	2	894.595	1788.18	107.444	49.5621	16689	16689	MS2	22/48	R_Col_0_1.raw
	VEIESLFDGVDLSEPLTR	Q39043	1	1	CID		64.0826	4.56171	1	1	1.0618e+06	2	1010.51	2020.02	491.097	88.3831	31871	31871	MS2	22/51	R_Col_0_1.raw
	IINEPTAAAIAYGLDK	O65719;Q39043;P22953;P22954;Q9LKR3;Q9LHA8;Q9S9N1	8	7	CID		65.0135	4.30559	1	1	4935787	2	830.51	1660.01	71.0558	59.4088	20570	20570	MS2	24/45	R_Col_0_1.raw
	VFSPEEISAMILTK	Q39043;Q9LKR3	2	2	CID		74.1019	4.24199	1	1	8590054	2	783.093	1565.18	222.905	83.5293	29978	29978	MS2	23/39	R_Col_0_1.raw
	VEIESLFDGVDLSEPLTR	Q39043	1	1	CID		58.1141	4.17583	1	1	1.07958e+06	2	1010.51	2020.02	491.097	88.2477	31818	31818	MS2	22/51	R_Col_0_1.raw
	IKDAVVTVPAYFNDAQR	Q39043;Q9LKR3	2	2	CID		76.7788	4.15363	1	1	2.63358e+06	2	954.013	1907.02	8.28573	48.4331	16244	16244	MS2	22/48	R_Col_0_1.raw
	LKEVEAVcNPIITAVYQR	Q39043;Q9LKR3	2	2	CID	C8(Carbamidomethyl)	89.9555	4.00261	1	1	1.35313e+06	2	1051.51	2102.02	-525.675	56.8753	19577	19577	MS2	23/51	R_Col_0_1.raw
	NGHVEIIANDQGNR	Q39043;Q9LKR3	2	2	CID		31.9188	3.94761	1	1	59267.8	3	513.171	1537.5	485.467	16.3154	3639	3639	MS2	28/78	R_Col_0_1.raw
	IINEPTAAAIAYGLDK	O65719;Q39043;P22953;P22954;Q9LKR3;Q9LHA8;Q9S9N1	8	7	CID		7.55343	3.87078	1	1	1.17761e+06	3	554.172	1660.5	364.29	59.0141	20416	20416	MS2	28/90	R_Col_0_1.raw
	EVEAVcNPIITAVYQR	Q39043;Q9LKR3	2	2	CID	C6(Carbamidomethyl)	47.9414	3.60163	1	1	3935314	2	932.012	1863.02	574.034	64.273	22479	22479	MS2	18/45	R_Col_0_1.raw
	IINEPTAAAIAYGLDKK	O65719;Q39043;P22953;P22954;Q9LKR3;Q9LHA8;Q9S9N1	8	7	CID		13.3122	3.53776	1	1	1.88153e+06	2	894.928	1788.85	480.09	50.9496	17235	17235	MS2	14/48	R_Col_0_1.raw
	SQIDEIVLVGGSTR	Q39043;Q9LKR3	2	2	CID		22.9159	3.4507	1	1	4825326	2	738.008	1475.01	826.33	53.0793	18076	18076	MS2	18/39	R_Col_0_1.raw
	DAGVIAGLNVAR	Q39043;Q9LKR3	2	2	CID		1	2.9642	1	1	3074049	1	1155.68	1155.68	30.3677	46.7105	15564	15564	MS2	19/33	R_Col_0_1.raw
	DAGVIAGLNVAR	Q39043;Q9LKR3	2	2	CID		1.10713	2.69151	1	1	1.38466e+06	1	1156.68	1156.68	894.899	46.2223	15372	15372	MS2	13/33	R_Col_0_1.raw
O65719	40.68	28	649	71.1032	5.07178	238.2	Heat shock 70 kDa protein 3 OS=Arabidopsis thaliana GN=HSP70-3 PE=1 SV=1 - [HSP7C_ARATH]
	Sequence	Protein Accessions	# Proteins	# Protein Groups	Activation Type	Modifications	Probability	XCorr	Δ Score	Rank	Intensity	Charge	m/z [Da]	MH+ [Da]	ΔM [ppm]	RT [min]	First Scan	Last Scan	MS Order	Ions Matched	Spectrum File	Annotation
	SINPDEAVAYGAAVQAAILSGEGNEK	O65719;P22954;Q9LHA8	4	3	CID		108.346	5.81183	1	1	1.24309e+06	2	1288.1	2575.2	360.858	85.2475	30649	30649	MS2	26/75	R_Col_0_1.raw
	IINEPTAAAIAYGLDK	O65719;Q39043;P22953;P22954;Q9LKR3;Q9LHA8;Q9S9N1	8	7	CID		59.1437	5.12424	1	1	7779391	2	831.01	1661.01	673.067	59.1819	20481	20481	MS2	25/45	R_Col_0_1.raw
	IINEPTAAAIAYGLDKK	O65719;Q39043;P22953;P22954;Q9LKR3;Q9LHA8;Q9S9N1	8	7	CID		57.9592	4.73409	1	1	6.53207e+06	2	894.595	1788.18	107.444	49.5621	16689	16689	MS2	22/48	R_Col_0_1.raw
	MYQGGEAGGPAAGGMDEDVPPSAGGAGPK	O65719	1	1	CID		71.2611	4.59728	1	1	2.39237e+06	2	1316.6	2632.2	400.252	38.38	12269	12269	MS2	30/84	R_Col_0_1.raw
	ATAGDTHLGGEDFDNR	O65719;P22953;P22954;Q9LHA8;Q9S9N1	6	5	CID		78.7985	4.49341	1	1	1.97097e+06	2	838.844	1676.68	566.287	21.5813	5600	5600	MS2	27/45	R_Col_0_1.raw
	VQQLLVDFFNGK	O65719	1	1	CID		50.638	4.41931	1	1	2681492	2	704.341	1407.68	-62.5928	74.0715	26288	26288	MS2	20/33	R_Col_0_1.raw
	IINEPTAAAIAYGLDK	O65719;Q39043;P22953;P22954;Q9LKR3;Q9LHA8;Q9S9N1	8	7	CID		65.0135	4.30559	1	1	4935787	2	830.51	1660.01	71.0558	59.4088	20570	20570	MS2	24/45	R_Col_0_1.raw
	ATAGDTHLGGEDFDNR	O65719;P22953;P22954;Q9LHA8;Q9S9N1	6	5	CID		59.1043	4.21887	1	1	640070	2	838.844	1676.68	566.287	23.0009	6166	6166	MS2	21/45	R_Col_0_1.raw
	MKELESIcNPIIAK	O65719;P22953	2	2	CID	C8(Carbamidomethyl)	51.8374	4.15224	1	1	4031253	2	823.927	1646.85	595.719	42.4131	13866	13866	MS2	18/39	R_Col_0_1.raw
	DAGVIAGLNVMR	O65719;P22953	2	2	CID		51.3793	4.11403	1	1	7474060	2	608.423	1215.84	153.381	57.2485	19724	19724	MS2	24/33	R_Col_0_1.raw
	EQVFSTYSDNQPGVLIQVYEGER	O65719;P22953	2	2	CID		82.9726	4.08851	1	1	1.15897e+06	2	1329.69	2658.37	36.7129	73.2343	25962	25962	MS2	20/66	R_Col_0_1.raw
	EQVFSTYSDNQPGVLIQVYEGER	O65719;P22953	2	2	CID		87.5155	3.96601	1	1	1.12386e+06	2	1329.6	2658.2	-25.9851	74.7035	26535	26535	MS2	19/66	R_Col_0_1.raw
	IINEPTAAAIAYGLDK	O65719;Q39043;P22953;P22954;Q9LKR3;Q9LHA8;Q9S9N1	8	7	CID		7.55343	3.87078	1	1	1.17761e+06	3	554.172	1660.5	364.29	59.0141	20416	20416	MS2	28/90	R_Col_0_1.raw
	SGPAEKPMIVVNYK	O65719	1	1	CID		11.774	3.85768	1	1	4488127	2	767.426	1533.84	671.474	29.9535	8931	8931	MS2	20/39	R_Col_0_1.raw
	ARFEELNIDLFR	O65719	1	1	CID		24.6937	3.82747	1	1	823138	3	508.504	1523.5	456.984	64.6932	22644	22644	MS2	23/66	R_Col_0_1.raw
	VQQLLVDFFNGK	O65719	1	1	CID		4.08943	3.79031	1	1	3.78753e+06	2	705.008	1409.01	883.777	73.5209	26072	26072	MS2	19/33	R_Col_0_1.raw
	EQVFSTYSDNQPGVLIQVYEGER	O65719;P22953	2	2	CID		1.34979	3.77878	1	1	2136761	3	886.678	2658.02	-93.6047	73.7097	26146	26146	MS2	26/132	R_Col_0_1.raw
	MDKNSIDDVVLVGGSTR	O65719	1	1	CID		43.1636	3.77762	1	1	2.26717e+06	2	903.928	1806.85	521.973	43.8352	14427	14427	MS2	23/48	R_Col_0_1.raw
	ELESIcNPIIAK	O65719;P22953	2	2	CID	C6(Carbamidomethyl)	14.9517	3.72182	1	1	16053184	2	694.424	1387.84	800.898	46.6433	15536	15536	MS2	18/33	R_Col_0_1.raw
	IINEPTAAAIAYGLDKK	O65719;Q39043;P22953;P22954;Q9LKR3;Q9LHA8;Q9S9N1	8	7	CID		13.3122	3.53776	1	1	1.88153e+06	2	894.928	1788.85	480.09	50.9496	17235	17235	MS2	14/48	R_Col_0_1.raw
	FTDSSVQSDIK	O65719	1	1	CID		20.2316	3.49343	1	1	5.06428e+06	2	614.339	1227.67	881	23.566	6392	6392	MS2	21/30	R_Col_0_1.raw
	MVNHFVQEFK	O65719;P22953;P22954;Q9LHA8	5	4	CID		26.8203	3.39327	1	1	6071779	2	639.84	1278.67	33.2569	29.6359	8805	8805	MS2	19/27	R_Col_0_1.raw
	TTPSYVAFTDSER	O65719;P22953;P22954;Q9LHA8	5	4	CID		54.7868	3.34281	1	1	20016212	2	737.425	1473.84	106.739	38.225	12206	12206	MS2	21/36	R_Col_0_1.raw
	NALENYAYNMR	O65719;P22953;P22954;Q9LHA8	4	4	CID		42.6439	3.33599	1	1	26168042	2	679.841	1358.67	42.8962	41.133	13358	13358	MS2	20/30	R_Col_0_1.raw
	NQVAMNPINTVFDAKR	O65719	1	1	CID		8.24736	3.16462	1	1	1.18136e+06	2	909.512	1818.02	45.9455	49.0884	16503	16503	MS2	16/45	R_Col_0_1.raw
	VEIIANDQGNR	O65719;P22953;P22954;Q9LHA8	5	4	CID		40.7373	3.10217	1	1	311018	2	614.756	1228.5	-100.286	20.0814	5007	5007	MS2	20/30	R_Col_0_1.raw
	DAGVIAGLNVMR	O65719;P22953	2	2	CID		1	2.58065	1	1	1.27938e+06	1	1215.6	1215.6	-41.5095	57.0922	19663	19663	MS2	13/33	R_Col_0_1.raw
	DAGVIAGLNVMR	O65719;P22953	2	2	CID		1	2.50948	1	1	1168383	1	1215.27	1215.27	-315.814	57.146	19684	19684	MS2	15/33	R_Col_0_1.raw
Q9LSB4	29.02	17	772	84.9649	4.69092	232.118	TSA1-like protein OS=Arabidopsis thaliana GN=NAI2 PE=1 SV=1 - [NAI2_ARATH]
	Sequence	Protein Accessions	# Proteins	# Protein Groups	Activation Type	Modifications	Probability	XCorr	Δ Score	Rank	Intensity	Charge	m/z [Da]	MH+ [Da]	ΔM [ppm]	RT [min]	First Scan	Last Scan	MS Order	Ions Matched	Spectrum File	Annotation
	GLEELKANDSTGDKDDDEHVAR	Q9LSB4	2	1	CID		127.358	5.05281	1	1	77578	3	805.26	2413.76	-141.678	19.0051	4595	4595	MS2	39/126	R_Col_0_1.raw
	AKDEQAAEEFAVETTK	Q9LSB4	2	1	CID		75.6062	4.77192	1	1	1.38647e+06	2	883.928	1766.85	2.40728	28.618	8403	8403	MS2	22/45	R_Col_0_1.raw
	GLEELKNESEQAENKR	Q9LSB4	2	1	CID		71.0302	4.76344	1	1	489185	2	937.679	1874.35	227.077	21.9731	5758	5758	MS2	21/45	R_Col_0_1.raw
	AKDEQAAEEFAVETTK	Q9LSB4	2	1	CID		75.166	4.54725	1	1	2.20365e+06	2	884.428	1767.85	568.076	30.014	8956	8956	MS2	17/45	R_Col_0_1.raw
	YEVLSSASIGYISLLAK	Q9LSB4	2	1	CID		37.8931	4.24647	1	1	1.45224e+06	2	908.095	1815.18	654.624	83.4472	29946	29946	MS2	19/48	R_Col_0_1.raw
	QLNLDDFSEGDDSAESAR	Q9LSB4	2	1	CID		42.3056	4.15941	1	1	2.29909e+06	2	984.93	1968.85	5.44496	49.5413	16682	16682	MS2	16/51	R_Col_0_1.raw
	EFEAAHAGFEQLKTDDSAQGLDDEQSAKR	Q9LSB4	2	1	CID		19.0625	4.0975	1	1	1.56871e+06	3	1065.43	3194.28	254.47	38.6231	12366	12366	MS2	25/168	R_Col_0_1.raw
	DLVNHPNFDAIIAAGTR	Q9LSB4	2	1	CID		52.2482	3.97645	1	1	1.1281e+06	2	912.429	1823.85	-49.4636	63.5873	22211	22211	MS2	24/48	R_Col_0_1.raw
	DLVNHPNFDAIIAAGTR	Q9LSB4	2	1	CID		20.0619	3.86803	1	1	916932	2	913.012	1825.02	589.844	63.4925	22174	22174	MS2	24/48	R_Col_0_1.raw
	FTSLTTSLSELLK	Q9LSB4	2	1	CID		34.3298	3.86773	1	1	5949101	2	721.008	1441.01	839.528	80.1626	28664	28664	MS2	24/36	R_Col_0_1.raw
	FTSLTTSLSELLK	Q9LSB4	2	1	CID		25.3812	3.8472	1	1	5905774	2	720.508	1440.01	145.658	80.3965	28756	28756	MS2	22/36	R_Col_0_1.raw
	EASQAYEEYHEAVHK	Q9LSB4	2	1	CID		42.2107	3.83913	1	1	86985.7	2	896.512	1792.02	679.535	18.4198	4377	4377	MS2	21/42	R_Col_0_1.raw
	INAHTVKDDVDDKEQDAK	Q9LSB4	2	1	CID		1	3.58397	1	1	20563.5	3	681.174	2041.51	256.777	16.0499	3553	3553	MS2	30/102	R_Col_0_1.raw
	AKDEQAAEEFAVETTKR	Q9LSB4	2	1	CID		6.74356	3.48043	1	1	1249915	2	962.429	1923.85	471.019	26.0428	7380	7380	MS2	19/48	R_Col_0_1.raw
	MLEEIEREFEEATK	Q9LSB4	2	1	CID		54.562	3.28913	1	1	875534	2	876.844	1752.68	-655.959	69.2154	24394	24394	MS2	15/39	R_Col_0_1.raw
	QSMLDEIERDFEAATK	Q9LSB4	1	1	CID		6.52628	3.21674	1	1	1.33367e+06	2	942.262	1883.52	335.726	85.6033	30788	30788	MS2	15/45	R_Col_0_1.raw
	TVIKEGLEASQR	Q9LSB4	2	1	CID		55.4083	3.10148	1	1	80396.8	2	665.924	1330.84	80.8815	17.9911	4220	4220	MS2	20/33	R_Col_0_1.raw
P54609	25.34	19	809	89.3374	5.24951	231.588	Cell division control protein 48 homolog A OS=Arabidopsis thaliana GN=CDC48A PE=1 SV=1 - [CD48A_ARATH]
	Sequence	Protein Accessions	# Proteins	# Protein Groups	Activation Type	Modifications	Probability	XCorr	Δ Score	Rank	Intensity	Charge	m/z [Da]	MH+ [Da]	ΔM [ppm]	RT [min]	First Scan	Last Scan	MS Order	Ions Matched	Spectrum File	Annotation
	DTHGYVGADLAALcTEAALQcIR	P54609	3	1	CID	C14(Carbamidomethyl) C21(Carbamidomethyl)	115.825	6.08995	1	1	1.00112e+06	2	1253.19	2505.36	70.5483	75.9699	27030	27030	MS2	28/66	R_Col_0_1.raw
	LVVDEAINDDNSVVSLHPATMEK	P54609	1	1	CID		68.5383	4.53109	1	1	1.05325e+06	2	1248.69	2496.36	53.6713	56.9126	19591	19591	MS2	24/66	R_Col_0_1.raw
	KYQAFAQTLQQSR	P54609	3	1	CID		56.8547	4.4122	1	1	1.53461e+06	2	785.426	1569.84	654.092	24.0752	6595	6595	MS2	22/36	R_Col_0_1.raw
	NAPSIIFIDEIDSIAPK	P54609	3	1	CID		62.8344	4.28678	1	1	1.54209e+06	2	922.512	1844.02	559.622	87.5997	31566	31566	MS2	25/48	R_Col_0_1.raw
	VLNQLLTEMDGMNAK	P54609	3	1	CID		50.2314	4.06362	1	1	2.50491e+06	2	838.927	1676.85	7.27708	65.0474	22784	22784	MS2	21/42	R_Col_0_1.raw
	KYQAFAQTLQQSR	P54609	3	1	CID		61.141	4.03284	1	1	1.80787e+06	2	784.926	1568.84	17.085	24.6674	6831	6831	MS2	23/36	R_Col_0_1.raw
	YTQGFSGADITEIcQR	P54609	3	1	CID	C14(Carbamidomethyl)	29.9344	4.02505	1	1	3.75147e+06	2	923.345	1845.68	-86.7714	49.7586	16767	16767	MS2	18/45	R_Col_0_1.raw
	NAPSIIFIDEIDSIAPK	P54609	3	1	CID		55.2913	3.98334	1	1	2945443	2	922.012	1843.02	17.3266	88.4225	31886	31886	MS2	24/48	R_Col_0_1.raw
	GPELLTmWFGESEANVR	P54609	3	1	CID	M7(Oxidation)	15.3907	3.77771	1	1	1.4952e+06	2	976.846	1952.69	391.064	82.6639	29640	29640	MS2	18/48	R_Col_0_1.raw
	QSAPcVLFFDELDSIATQR	P54609	3	1	CID	C5(Carbamidomethyl)	63.3984	3.74913	1	1	1.60097e+06	2	1098.93	2196.86	-92.1925	94.5648	34283	34283	MS2	23/54	R_Col_0_1.raw
	RSENPEAMEEDGVDEVSEIK	P54609	1	1	CID		35.8689	3.73292	1	1	1.48226e+06	2	1131.52	2262.02	-432.49	44.3031	14614	14614	MS2	24/57	R_Col_0_1.raw
	LDQLIYIPLPDEDSR	P54609	2	1	CID		39.6132	3.72771	1	1	1691245	2	894.511	1788.02	611.566	78.3171	27946	27946	MS2	21/42	R_Col_0_1.raw
	LVVDEAINDDNSVVSLHPATMEK	P54609	1	1	CID		55.0482	3.65224	1	1	773157	2	1249.27	2497.53	520.784	56.8615	19571	19571	MS2	21/66	R_Col_0_1.raw
	IVSQLLTLMDGLK	P54609	3	1	CID		8.3255	3.63411	1	1	1.64023e+06	2	716.425	1431.84	707.741	86.0652	30968	30968	MS2	17/36	R_Col_0_1.raw
	QSAPcVLFFDELDSIATQR	P54609	3	1	CID	C5(Carbamidomethyl)	48.4817	3.50715	1	1	826462	2	1099.43	2197.86	362.847	93.952	34044	34044	MS2	17/54	R_Col_0_1.raw
	AIANEcQANFISVK	P54609	2	1	CID	C6(Carbamidomethyl)	39.8214	3.47588	1	1	6188901	2	782.926	1564.84	42.0887	39.7276	12802	12802	MS2	17/39	R_Col_0_1.raw
	SENPEAMEEDGVDEVSEIK	P54609	1	1	CID		51.4051	3.28761	1	1	1.43474e+06	2	1053.93	2106.86	-22.2372	52.7438	17945	17945	MS2	23/54	R_Col_0_1.raw
	AIANEcQANFISVK	P54609	2	1	CID	C6(Carbamidomethyl)	40.5065	3.26318	1	1	4483692	2	783.426	1565.84	680.707	39.2296	12607	12607	MS2	17/39	R_Col_0_1.raw
	VLNQLLTEMDGMNAK	P54609	3	1	CID		52.0286	3.2583	1	1	2311946	2	839.01	1677.01	106.661	64.8217	22694	22694	MS2	19/42	R_Col_0_1.raw
O04310	32.77	22	705	72.4296	5.50342	229.841	Jacalin-related lectin 34 OS=Arabidopsis thaliana GN=JAL34 PE=1 SV=1 - [JAL34_ARATH]
	Sequence	Protein Accessions	# Proteins	# Protein Groups	Activation Type	Modifications	Probability	XCorr	Δ Score	Rank	Intensity	Charge	m/z [Da]	MH+ [Da]	ΔM [ppm]	RT [min]	First Scan	Last Scan	MS Order	Ions Matched	Spectrum File	Annotation
	LEAQGNSTGGTSWDDGSDYDGVTK	O04310	1	1	CID		106.936	5.13896	1	1	2.20724e+06	2	1231.02	2461.03	400.355	39.2902	12632	12632	MS2	23/69	R_Col_0_1.raw
	LTAEGGETGAVWDDGSHDDVKK	O04310	1	1	CID		53.8388	4.86942	1	1	812366	2	1144.1	2287.19	63.2263	26.259	7466	7466	MS2	21/63	R_Col_0_1.raw
	LTAEGGETGAVWDDGSHDDVKK	O04310	1	1	CID		58.1614	4.76317	1	1	1.11395e+06	2	1144.6	2288.19	500.233	25.8069	7285	7285	MS2	20/63	R_Col_0_1.raw
	SLSTQEVITALTFTTNK	O04310	1	1	CID		51.2835	4.69534	1	1	7980232	2	928.012	1855.02	556.041	76.5622	27260	27260	MS2	22/48	R_Col_0_1.raw
	NFGVDTVVTTLIFK	O04310	1	1	CID		66.4185	4.6203	1	1	4.26583e+06	2	777.509	1554.01	98.9397	89.1132	32156	32156	MS2	25/39	R_Col_0_1.raw
	LEAQGNSTGGTSWDDGSDYDGVTK	O04310	1	1	CID		97.3978	4.57687	1	1	1.6513e+06	2	1230.52	2460.03	-5.98896	39.4269	12685	12685	MS2	23/69	R_Col_0_1.raw
	TNLNTYEVSIYPFEPSTDTK	O04310	1	1	CID		37.4107	4.48124	1	1	811208	2	1160.02	2319.03	-33.1045	71.0575	25112	25112	MS2	19/57	R_Col_0_1.raw
	IYASYGGEGIQYVK	O04310	1	1	CID		83.226	4.39247	1	1	18725522	2	774.426	1547.84	45.4422	42.7684	14006	14006	MS2	26/39	R_Col_0_1.raw
	VYVGQGQDGVAAVK	O04310	1	1	CID		72.3238	4.31091	1	1	21267070	2	695.924	1390.84	78.2266	25.4194	7130	7130	MS2	26/39	R_Col_0_1.raw
	TNLNTYEVSIYPFEPSTDTK	O04310	1	1	CID		39.9753	4.28102	1	1	2394299	2	1160.6	2320.19	469.754	69.6461	24562	24562	MS2	17/57	R_Col_0_1.raw
	SGFQISAPEATGK	O04310	1	1	CID		58.5675	3.95344	1	1	19233872	2	646.84	1292.67	19.0578	33.8637	10478	10478	MS2	23/36	R_Col_0_1.raw
	LEAQGNSTGGTSWDDGSDYDGVTK	O04310	1	1	CID		69.7691	3.91433	1	1	1.22008e+06	2	1230.43	2459.86	-73.7451	41.2118	13391	13391	MS2	21/69	R_Col_0_1.raw
	FGVHVAPITK	O04310	1	1	CID		29.5256	3.82667	1	1	7195818	3	357.334	1069.99	1279.16	26.8225	7688	7688	MS2	32/54	R_Col_0_1.raw
	NFGVDTVVTTLIFK	O04310	1	1	CID		49.7634	3.72467	1	1	1.65973e+06	2	777.343	1553.68	-115.588	87.7294	31616	31616	MS2	26/39	R_Col_0_1.raw
	LEGAGSEAGTLWDDGAFDGVR	O04310	1	1	CID		12.4663	3.49412	1	1	707815	2	1061.6	2122.19	-367.018	68.2	23996	23996	MS2	20/60	R_Col_0_1.raw
	VYVGQGQDGVAAVK	O04310	1	1	CID		69.2132	3.41881	1	1	3.78784e+06	2	695.341	1389.67	-761.249	25.8721	7310	7310	MS2	26/39	R_Col_0_1.raw
	AGEYVNAIGAYLAPSGTTPLTPATQSQK	O04310	1	1	CID		23.1261	3.26873	1	1	995422	2	1404.19	2807.37	335.866	73.6515	26124	26124	MS2	19/81	R_Col_0_1.raw
	IIGFHGFAGNHVNSIGAYFVPK	O04310	1	1	CID		9.3939	3.20467	1	1	812417	2	1172.52	2344.03	-508.768	61.9642	21575	21575	MS2	16/63	R_Col_0_1.raw
	VYVGQGQDGVAAVK	O04310	1	1	CID		56.9494	3.13467	1	1	1.40512e+06	1	1390.85	1390.85	87.6157	25.259	7068	7068	MS2	18/39	R_Col_0_1.raw
	SGFQISAPEATGK	O04310	1	1	CID		35.4888	2.72718	1	1	2207499	1	1292.6	1292.6	-35.3084	33.2992	10258	10258	MS2	19/36	R_Col_0_1.raw
	FGVHVAPITK	O04310	1	1	CID		6.54161	2.66412	1	1	1.16344e+06	1	1068.68	1068.68	57.4939	26.626	7612	7612	MS2	17/27	R_Col_0_1.raw
	SSTTPVPSTPLK	O04310	1	1	CID		15.8828	2.60835	1	1	1.24081e+06	1	1214.6	1214.6	-50.8137	24.8503	6904	6904	MS2	15/33	R_Col_0_1.raw
Q9C8Y9	24.05	20	524	59.743	7.21045	227.585	Beta-glucosidase 22 OS=Arabidopsis thaliana GN=BGLU22 PE=1 SV=1 - [BGL22_ARATH]
	Sequence	Protein Accessions	# Proteins	# Protein Groups	Activation Type	Modifications	Probability	XCorr	Δ Score	Rank	Intensity	Charge	m/z [Da]	MH+ [Da]	ΔM [ppm]	RT [min]	First Scan	Last Scan	MS Order	Ions Matched	Spectrum File	Annotation
	GVSQAGVKFYHDLIDELLK	Q9C8Y9	2	1	CID		106	5.58854	0.0609814	1	4.45084e+06	2	1067.1	2133.19	492.381	89.4843	32300	32300	MS2	28/54	R_Col_0_1.raw
	VLDFMLGWHLDPTTFGDYPQIMK	Q9C8Y9	2	1	CID		125.563	5.48028	1	1	2.55613e+06	3	909.012	2725.02	257.104	96.7701	35145	35145	MS2	42/132	R_Col_0_1.raw
	NVDHSAIGSQPLTAALPVYAK	Q9C8Y9	2	1	CID		74.5132	5.46748	1	1	909252	2	1076.93	2152.86	332.734	53.2948	18162	18162	MS2	26/60	R_Col_0_1.raw
	EKGVSQAGVKFYHDLIDELLK	Q9C8Y9	2	1	CID		75.9554	5.23786	0.0559574	1	1.02227e+06	2	1195.68	2390.36	453.661	83.0972	29810	29810	MS2	25/60	R_Col_0_1.raw
	EKGVSQAGVKFYHDLIDELLK	Q9C8Y9	2	1	CID		76.8799	5.05984	0.00781105	1	768342	2	1195.18	2389.36	35.3205	83.1382	29826	29826	MS2	23/60	R_Col_0_1.raw
	GVSQAGVKFYHDLIDELLK	Q9C8Y9	2	1	CID		95.4951	4.79856		2	10440240	2	1066.51	2132.02	-54.5712	90.4126	32660	32660	MS2	25/54	R_Col_0_1.raw
	GVSQAGVKFYHDLIDELLK	Q9C8Y9	2	1	CID		57.1849	4.13069	0.060663	1	922707	2	1067.01	2133.02	414.282	91.9055	33245	33245	MS2	24/54	R_Col_0_1.raw
	NVDHSAIGSQPLTAALPVYAK	Q9C8Y9	2	1	CID		120.956	4.08266	1	1	1.25835e+06	2	1076.1	2151.19	-441.788	53.8429	18376	18376	MS2	28/60	R_Col_0_1.raw
	NVDHSAIGSQPLTAALPVYAK	Q9C8Y9	2	1	CID		18.7434	3.78161	1	1	2.98076e+06	3	718.508	2153.51	636.147	54.538	18651	18651	MS2	36/120	R_Col_0_1.raw
	GVSQAGVKFYHDLIDELLK	Q9C8Y9	2	1	CID		66.1308	3.74758	1	1	37431904	3	711.508	2132.51	173.787	90.2267	32588	32588	MS2	40/108	R_Col_0_1.raw
	DKYANPEIMIMENGYGDK	Q9C525-2;Q9C8Y9	4	2	CID		77.2376	3.73143	1	1	1.80021e+06	2	1044.6	2088.19	118.209	53.7412	18336	18336	MS2	20/51	R_Col_0_1.raw
	cSGHNADVAVDFFHR	Q9C8Y9	2	1	CID	C1(Carbamidomethyl)	19.3155	3.71398		2	3.13422e+06	3	578.339	1733	713.163	33.5939	10372	10372	MS2	26/84	R_Col_0_1.raw
	FGLYYVDFK	Q9C525-2;Q9SR37;Q9C8Y9	4	3	CID		27.8938	3.63347	1	1	4.3597e+06	2	576.339	1151.67	80.6466	67.3277	23659	23659	MS2	16/24	R_Col_0_1.raw
	FYHDLIDELLK	Q9C8Y9	2	1	CID		25.5688	3.60853	1	1	1.18822e+06	3	469.337	1406	184.233	72.8111	25798	25798	MS2	32/60	R_Col_0_1.raw
	DKYANPEIMIMENGYGDK	Q9C525-2;Q9C8Y9	4	2	CID		16.4904	3.39391	1	1	975662	2	1044.51	2088.02	38.3961	55.156	18897	18897	MS2	20/51	R_Col_0_1.raw
	GPALWDIFcK	Q9C8Y9	2	1	CID	C9(Carbamidomethyl)	38.8844	3.35833	1	1	1.75328e+06	2	604.339	1207.67	888.907	76.5236	27245	27245	MS2	19/27	R_Col_0_1.raw
	FGLYYVDFK	Q9C525-2;Q9SR37;Q9C8Y9	4	3	CID		26.0293	3.30612	1	1	52799068	2	576.422	1151.84	225.334	65.7611	23064	23064	MS2	19/24	R_Col_0_1.raw
	YKEDIQLMK	Q9SE50-2;Q9C525-2;Q9SR37;Q9C8Y9	9	4	CID		11.926	3.10892		2	16943096	2	584.339	1167.67	53.5406	24.2006	6644	6644	MS2	16/24	R_Col_0_1.raw
	FGLYYVDFK	Q9C525-2;Q9SR37;Q9C8Y9	4	3	CID		43.2395	2.58811	1	1	388589	1	1150.77	1150.77	-704.527	65.316	22890	22890	MS2	15/24	R_Col_0_1.raw
	YKEDIQLMK	Q9SE50-2;Q9C525-2;Q9SR37;Q9C8Y9	9	4	CID		10.9376	2.54361		2	946275	1	1167.6	1167.6	-6.6439	24.1788	6637	6637	MS2	13/24	R_Col_0_1.raw
P93819	49.1	22	332	35.5483	6.55127	221.029	Malate dehydrogenase 1, cytoplasmic OS=Arabidopsis thaliana GN=MDH1 PE=1 SV=2 - [MDHC1_ARATH]
	Sequence	Protein Accessions	# Proteins	# Protein Groups	Activation Type	Modifications	Probability	XCorr	Δ Score	Rank	Intensity	Charge	m/z [Da]	MH+ [Da]	ΔM [ppm]	RT [min]	First Scan	Last Scan	MS Order	Ions Matched	Spectrum File	Annotation
	ELVKDDAWLDGEFISTVQQR	P93819	1	1	CID		76.7888	5.04676	1	1	1.10357e+06	2	1175.6	2350.19	434.445	71.935	25455	25455	MS2	23/57	R_Col_0_1.raw
	LSSALSAASSAcDHIR	P93819	2	1	CID	C12(Carbamidomethyl)	74.3096	4.91314	1	1	4018867	2	823.343	1645.68	-70.9014	30.0423	8966	8966	MS2	25/45	R_Col_0_1.raw
	NVIIWGNHSSSQYPDVNHAK	P93819	1	1	CID		103.183	4.87578	1	1	1.0635e+06	2	1133.6	2266.19	40.4267	32.026	9753	9753	MS2	23/57	R_Col_0_1.raw
	ELVKDDAWLDGEFISTVQQR	P93819	1	1	CID		100.958	4.87075	1	1	776110	2	1175.02	2349.03	-62.0086	70.4155	24862	24862	MS2	23/57	R_Col_0_1.raw
	VLVTGAAGQIGYALVPMIAR	P93819	2	1	CID		92.8967	4.70104	1	1	3.75411e+06	2	1001.1	2001.19	524.823	84.2215	30248	30248	MS2	27/57	R_Col_0_1.raw
	KLSSALSAASSAcDHIR	P93819	2	1	CID	C13(Carbamidomethyl)	57.5705	4.55462	1	1	9200142	3	592.256	1774.75	485.205	26.1424	7418	7418	MS2	40/96	R_Col_0_1.raw
	MELIDAAFPLLK	P93819	1	1	CID		36.7646	4.5397	1	1	3.5475e+06	2	681.424	1361.84	797.626	86.9001	31293	31293	MS2	23/33	R_Col_0_1.raw
	VLVVANPANTNALILK	P93819	3	1	CID		90.7353	4.44738	1	1	19076712	2	825.593	1650.18	111.97	60.1878	20876	20876	MS2	25/45	R_Col_0_1.raw
	VLVVANPANTNALILK	P93819	3	1	CID		21.458	4.41661	1	1	770618	2	825.427	1649.85	-90.0506	61.5657	21418	21418	MS2	22/45	R_Col_0_1.raw
	NGDWSIVQGLPIDEVSR	P93819	1	1	CID		50.814	4.38914	1	1	6316578	2	943.012	1885.02	38.4535	76.3791	27189	27189	MS2	23/48	R_Col_0_1.raw
	MELIDAAFPLLK	P93819	1	1	CID		22.4185	4.26423	1	1	4855302	2	680.924	1360.84	63.3583	85.5112	30752	30752	MS2	22/33	R_Col_0_1.raw
	KMDLTAEELKEEK	P93819	2	1	CID		54.5833	4.25188	1	1	674267	2	782.259	1563.51	-180.467	21.9326	5742	5742	MS2	20/36	R_Col_0_1.raw
	NVIIWGNHSSSQYPDVNHAK	P93819	1	1	CID		45.064	4.23035	1	1	10407802	3	756.425	2267.26	512.472	32.5463	9957	9957	MS2	36/114	R_Col_0_1.raw
	KLSSALSAASSAcDHIR	P93819	2	1	CID	C13(Carbamidomethyl)	42.6165	4.06946	1	1	7.5735e+06	3	591.922	1773.75	-78.3086	26.1466	7420	7420	MS2	33/96	R_Col_0_1.raw
	NGDWSIVQGLPIDEVSR	P93819	1	1	CID		28.7757	3.92732	1	1	7334413	2	943.512	1886.02	568.661	76.3768	27188	27188	MS2	23/48	R_Col_0_1.raw
	KMDLTAEELKEEK	P93819	2	1	CID		42.6406	3.64656	1	1	323734	2	782.926	1564.84	671.758	21.6509	5629	5629	MS2	19/36	R_Col_0_1.raw
	NGDWSIVQGLPIDEVSR	P93819	1	1	CID		20.3985	3.62599	1	1	943236	2	943.512	1886.02	568.661	87.0072	31335	31335	MS2	20/48	R_Col_0_1.raw
	VLVTGAAGQIGYALVPMIAR	P93819	2	1	CID		1	3.47527	1	1	834327	2	1000.6	2000.19	25.1225	82.7653	29680	29680	MS2	18/57	R_Col_0_1.raw
	GIMLGADQPVILHMLDIPPAAEALNGVK	P93819	1	1	CID		31.8584	3.30458	1	1	491750	2	1442.36	2883.7	54.2074	92.4318	33450	33450	MS2	18/81	R_Col_0_1.raw
	MELIDAAFPLLK	P93819	1	1	CID		35.0448	3.23407	1	1	1.07167e+06	2	680.841	1360.67	-59.1246	87.5151	31533	31533	MS2	20/33	R_Col_0_1.raw
	VLVTGAAGQIGYALVPMIAR	P93819	2	1	CID		1	3.15792	1	1	4660518	2	1001.18	2001.35	608.058	84.1317	30213	30213	MS2	21/57	R_Col_0_1.raw
	MELIDAAFPLLK	P93819	1	1	CID		27.8138	2.84333	1	1	542464	1	1360.77	1360.77	11.7179	85.5927	30785	30785	MS2	16/33	R_Col_0_1.raw
Q9LKR3	22.12	17	669	73.584	5.17334	220.666	Mediator of RNA polymerase II transcription subunit 37a OS=Arabidopsis thaliana GN=MED37A PE=1 SV=1 - [MD37A_ARATH]
	Sequence	Protein Accessions	# Proteins	# Protein Groups	Activation Type	Modifications	Probability	XCorr	Δ Score	Rank	Intensity	Charge	m/z [Da]	MH+ [Da]	ΔM [ppm]	RT [min]	First Scan	Last Scan	MS Order	Ions Matched	Spectrum File	Annotation
	SGGAPGGAGGESSTEEEDESHDEL	Q9LKR3	1	1	CID		110.281	5.72509	1	1	799934	2	1152.35	2303.69	-90.9801	24.3733	6714	6714	MS2	27/69	R_Col_0_1.raw
	LKEVEAVcNPIITAVYQR	Q39043;Q9LKR3	2	2	CID	C8(Carbamidomethyl)	62.2926	5.38603	1	1	850050	2	1052.68	2104.36	583.74	58.282	20129	20129	MS2	26/51	R_Col_0_1.raw
	IINEPTAAAIAYGLDK	O65719;Q39043;P22953;P22954;Q9LKR3;Q9LHA8;Q9S9N1	8	7	CID		59.1437	5.12424	1	1	7779391	2	831.01	1661.01	673.067	59.1819	20481	20481	MS2	25/45	R_Col_0_1.raw
	VEIESLFDGVDFSEPLTR	Q9LKR3	3	1	CID		44.9801	4.88825	1	1	2.11556e+06	2	1027.51	2054.02	490.908	88.8372	32048	32048	MS2	23/51	R_Col_0_1.raw
	IINEPTAAAIAYGLDKK	O65719;Q39043;P22953;P22954;Q9LKR3;Q9LHA8;Q9S9N1	8	7	CID		57.9592	4.73409	1	1	6.53207e+06	2	894.595	1788.18	107.444	49.5621	16689	16689	MS2	22/48	R_Col_0_1.raw
	VEIESLFDGVDFSEPLTR	Q9LKR3	3	1	CID		62.2856	4.61029	1	1	1.46351e+06	2	1026.85	2052.69	-158.341	89.3547	32250	32250	MS2	25/51	R_Col_0_1.raw
	IINEPTAAAIAYGLDK	O65719;Q39043;P22953;P22954;Q9LKR3;Q9LHA8;Q9S9N1	8	7	CID		65.0135	4.30559	1	1	4935787	2	830.51	1660.01	71.0558	59.4088	20570	20570	MS2	24/45	R_Col_0_1.raw
	VFSPEEISAMILTK	Q39043;Q9LKR3	2	2	CID		74.1019	4.24199	1	1	8590054	2	783.093	1565.18	222.905	83.5293	29978	29978	MS2	23/39	R_Col_0_1.raw
	IKDAVVTVPAYFNDAQR	Q39043;Q9LKR3	2	2	CID		76.7788	4.15363	1	1	2.63358e+06	2	954.013	1907.02	8.28573	48.4331	16244	16244	MS2	22/48	R_Col_0_1.raw
	LKEVEAVcNPIITAVYQR	Q39043;Q9LKR3	2	2	CID	C8(Carbamidomethyl)	89.9555	4.00261	1	1	1.35313e+06	2	1051.51	2102.02	-525.675	56.8753	19577	19577	MS2	23/51	R_Col_0_1.raw
	NGHVEIIANDQGNR	Q39043;Q9LKR3	2	2	CID		31.9188	3.94761	1	1	59267.8	3	513.171	1537.5	485.467	16.3154	3639	3639	MS2	28/78	R_Col_0_1.raw
	IINEPTAAAIAYGLDK	O65719;Q39043;P22953;P22954;Q9LKR3;Q9LHA8;Q9S9N1	8	7	CID		7.55343	3.87078	1	1	1.17761e+06	3	554.172	1660.5	364.29	59.0141	20416	20416	MS2	28/90	R_Col_0_1.raw
	EVEAVcNPIITAVYQR	Q39043;Q9LKR3	2	2	CID	C6(Carbamidomethyl)	47.9414	3.60163	1	1	3935314	2	932.012	1863.02	574.034	64.273	22479	22479	MS2	18/45	R_Col_0_1.raw
	IINEPTAAAIAYGLDKK	O65719;Q39043;P22953;P22954;Q9LKR3;Q9LHA8;Q9S9N1	8	7	CID		13.3122	3.53776	1	1	1.88153e+06	2	894.928	1788.85	480.09	50.9496	17235	17235	MS2	14/48	R_Col_0_1.raw
	SQIDEIVLVGGSTR	Q39043;Q9LKR3	2	2	CID		22.9159	3.4507	1	1	4825326	2	738.008	1475.01	826.33	53.0793	18076	18076	MS2	18/39	R_Col_0_1.raw
	DAGVIAGLNVAR	Q39043;Q9LKR3	2	2	CID		1	2.9642	1	1	3074049	1	1155.68	1155.68	30.3677	46.7105	15564	15564	MS2	19/33	R_Col_0_1.raw
	DAGVIAGLNVAR	Q39043;Q9LKR3	2	2	CID		1.10713	2.69151	1	1	1.38466e+06	1	1156.68	1156.68	894.899	46.2223	15372	15372	MS2	13/33	R_Col_0_1.raw
P55737	25.75	18	699	80.0139	5.04639	219.987	Heat shock protein 90-2 OS=Arabidopsis thaliana GN=HSP90-2 PE=1 SV=1 - [HS902_ARATH]
	Sequence	Protein Accessions	# Proteins	# Protein Groups	Activation Type	Modifications	Probability	XCorr	Δ Score	Rank	Intensity	Charge	m/z [Da]	MH+ [Da]	ΔM [ppm]	RT [min]	First Scan	Last Scan	MS Order	Ions Matched	Spectrum File	Annotation
	KPEEINKEEYAAFYK	P55737	3	1	CID		102.751	5.36681	1	1	5034163	2	929.929	1858.85	-38.6245	28.0964	8195	8195	MS2	26/42	R_Col_0_1.raw
	GIEVLYMVDAIDEYAIGQLK	P55737	2	1	CID		137.643	5.07178	1	1	87649.2	3	747.675	2241.01	383.497	105.207	38391	38391	MS2	40/114	R_Col_0_1.raw
	VVDSPccLVTGEYGWTANMER	P55737	3	1	CID	C6(Carbamidomethyl) C7(Carbamidomethyl)	101.903	4.9874	1	1	1.02395e+06	2	1222.43	2443.86	-84.4157	68.2978	24034	24034	MS2	24/60	R_Col_0_1.raw
	GIEVLYMVDAIDEYAIGQLK	P55737	2	1	CID		110.169	4.67126	1	1	88782.4	2	1120.68	2240.36	91.861	105.498	38493	38493	MS2	23/57	R_Col_0_1.raw
	VVDSPccLVTGEYGWTANMER	P55737	3	1	CID	C6(Carbamidomethyl) C7(Carbamidomethyl)	102.126	4.64827	1	1	3.31633e+06	2	1223.02	2445.03	392.793	67.6511	23776	23776	MS2	21/60	R_Col_0_1.raw
	KGIEVLYMVDAIDEYAIGQLK	P55737	2	1	CID		5.06975	4.39879	1	1	679271	2	1184.77	2368.53	118.207	95.8659	34791	34791	MS2	18/60	R_Col_0_1.raw
	MKEGQNDIFYITGESKK	P55737	2	1	CID		37.4944	4.30466	1	1	1.27953e+06	2	994.43	1987.85	-63.6477	30.661	9214	9214	MS2	22/48	R_Col_0_1.raw
	GIVDSEDLPLNISR	P55737	3	1	CID		24.0596	4.29971	1	1	6476337	2	764.509	1528.01	136.976	61.4251	21362	21362	MS2	20/39	R_Col_0_1.raw
	KTMEINPENSIMDELR	P55737	3	1	CID		26.6583	4.29427	1	1	1.38228e+06	2	960.513	1920.02	51.0633	56.3424	19367	19367	MS2	20/45	R_Col_0_1.raw
	TMEINPENSIMDELR	P55737	3	1	CID		62.1344	4.17654	1	1	547075	2	895.762	1790.52	-731.349	68.5227	24122	24122	MS2	20/42	R_Col_0_1.raw
	VFIMDNcEDIIPEYLGFVK	P55737	2	1	CID	C7(Carbamidomethyl)	39.4611	3.9884	1	1	4580226	2	1152.02	2303.03	396.073	93.7756	33974	33974	MS2	20/54	R_Col_0_1.raw
	KTMEINPENSIMDELR	P55737	3	1	CID		42.5307	3.42051	1	1	2.0541e+06	2	960.429	1919.85	-35.7462	56.3977	19389	19389	MS2	19/45	R_Col_0_1.raw
	GIVDSEDLPLNISR	P55737	3	1	CID		11.3148	3.26866	1	1	580400	2	763.842	1526.68	-736.278	61.7189	21478	21478	MS2	16/39	R_Col_0_1.raw
	TNNTLTIIDSGIGMTK	P55737	3	1	CID		12.7461	3.25248	1	1	2.07647e+06	2	840.594	1680.18	780.994	61.1556	21256	21256	MS2	15/45	R_Col_0_1.raw
	ELISNSSDALDK	P55737	4	1	CID		21.5401	3.22915	1	1	10788114	2	646.34	1291.67	27.1943	28.2272	8246	8246	MS2	16/33	R_Col_0_1.raw
	GIEVLYMVDAIDEYAIGQLKEFEGKK	P55737	2	1	CID		45.9141	3.16412	1	1	142751	2	1480.27	2959.54	345.104	104.334	38081	38081	MS2	17/75	R_Col_0_1.raw
	EVSHEWDLVNK	P55737	2	1	CID		21.5485	3.14893	1	1	1.74334e+06	2	677.841	1354.67	-727.153	30.1422	9006	9006	MS2	15/30	R_Col_0_1.raw
	ADLVNNLGTIAR	P55737	4	1	CID		36.7067	3.06681	1	1	15850680	2	628.923	1256.84	113.769	46.6455	15537	15537	MS2	16/33	R_Col_0_1.raw
Q9LUT2	26.46	21	393	42.7687	5.80811	218.847	S-adenosylmethionine synthase 4 OS=Arabidopsis thaliana GN=METK4 PE=1 SV=1 - [METK4_ARATH]
	Sequence	Protein Accessions	# Proteins	# Protein Groups	Activation Type	Modifications	Probability	XCorr	Δ Score	Rank	Intensity	Charge	m/z [Da]	MH+ [Da]	ΔM [ppm]	RT [min]	First Scan	Last Scan	MS Order	Ions Matched	Spectrum File	Annotation
	LcDQISDAILDAcLEQDPESK	Q9SJL8;Q9LUT2	2	2	CID	C2(Carbamidomethyl) C13(Carbamidomethyl)	85.448	5.1066	1	1	1.14311e+06	2	1211.02	2421.03	385.07	72.0595	25503	25503	MS2	26/60	R_Col_0_1.raw
	LcDQISDAILDAcLEQDPESK	Q9SJL8;Q9LUT2	2	2	CID	C2(Carbamidomethyl) C13(Carbamidomethyl)	88.7344	4.97211	1	1	866480	2	1211.1	2421.19	453.881	70.6447	24950	24950	MS2	25/60	R_Col_0_1.raw
	TQVTIEYINESGAMVPVR	Q9LUT2	1	1	CID		45.9225	4.83668	1	1	1243315	2	1004.51	2008.02	497.174	62.6033	21827	21827	MS2	21/51	R_Col_0_1.raw
	EIGFVSADVGLDADNcK	Q9LUT2	1	1	CID	C16(Carbamidomethyl)	36.0382	4.36808	1	1	1.30774e+06	2	905.428	1809.85	9.40465	58.4974	20213	20213	MS2	22/48	R_Col_0_1.raw
	FVIGGPHGDAGLTGR	Q9SJL8;P17562;P23686;Q9LUT2	4	4	CID		72.2735	4.32882	1	1	12443481	2	727.425	1453.84	60.4394	32.089	9776	9776	MS2	27/42	R_Col_0_1.raw
	TNMVMVFGEITTK	P17562;P23686;Q9LUT2	3	3	CID		39.3365	4.22398	1	1	14571.8	2	736.342	1471.68	640.825	123.812	44402	44402	MS2	22/36	R_Col_0_1.raw
	TNMVMVFGEITTK	P17562;P23686;Q9LUT2	3	3	CID		49.7524	3.92936	1	1	17097.3	2	736.425	1471.84	753.992	114.453	41398	41398	MS2	23/36	R_Col_0_1.raw
	ANVDYEQIVR	Q9LUT2	1	1	CID		26.4314	3.9156	1	1	12466540	2	603.839	1206.67	49.5347	34.0504	10551	10551	MS2	18/27	R_Col_0_1.raw
	TNMVMVFGEITTK	P17562;P23686;Q9LUT2	3	3	CID		34.9956	3.8323	1	1	13039.6	2	736.258	1471.51	527.633	116.867	42170	42170	MS2	20/36	R_Col_0_1.raw
	TNMVMVFGEITTK	P17562;P23686;Q9LUT2	3	3	CID		34.3605	3.77898	1	1	1.00262e+06	2	736.008	1471.01	187.904	73.9542	26243	26243	MS2	21/36	R_Col_0_1.raw
	TNMVMVFGEITTK	P17562;P23686;Q9LUT2	3	3	CID		35.7265	3.53846	1	1	15521.6	2	736.342	1471.68	640.825	121.436	43637	43637	MS2	24/36	R_Col_0_1.raw
	FVIGGPHGDAGLTGR	Q9SJL8;P17562;P23686;Q9LUT2	4	4	CID		1.68402	3.4887	1	1	4.13855e+06	2	727.425	1453.84	60.4394	33.4533	10318	10318	MS2	22/42	R_Col_0_1.raw
	TNMVMVFGEITTK	P17562;P23686;Q9LUT2	3	3	CID		34.3529	3.4838	1	1	47840	2	736.342	1471.68	640.825	103.721	37858	37858	MS2	21/36	R_Col_0_1.raw
	TNMVMVFGEITTK	P17562;P23686;Q9LUT2	3	3	CID		25.4306	3.47855	1	1	944140	2	736.258	1471.51	527.633	84.1548	30223	30223	MS2	18/36	R_Col_0_1.raw
	TNMVMVFGEITTK	P17562;P23686;Q9LUT2	3	3	CID		57.6899	3.4715	1	1	8409.37	2	736.175	1471.34	414.416	132.292	47146	47146	MS2	22/36	R_Col_0_1.raw
	LcDQISDAILDAcLEQDPESK	Q9SJL8;Q9LUT2	2	2	CID	C2(Carbamidomethyl) C13(Carbamidomethyl)	59.62	3.42976	1	1	718705	2	1210.6	2420.19	40.8708	72.4912	25672	25672	MS2	18/60	R_Col_0_1.raw
	TQVTIEYINESGAMVPVR	Q9LUT2	1	1	CID		36.0004	3.34937	1	1	436463	2	1004.26	2007.52	248.229	61.0433	21214	21214	MS2	17/51	R_Col_0_1.raw
	EIGFVSADVGLDADNcK	Q9LUT2	1	1	CID	C16(Carbamidomethyl)	1.26034	3.2476	1	1	1699081	2	905.845	1810.68	469.641	60.2883	20916	20916	MS2	15/48	R_Col_0_1.raw
	TNMVMVFGEITTK	P17562;P23686;Q9LUT2	3	3	CID		24.1486	3.14456	1	1	2.76336e+06	2	735.925	1470.84	74.609	70.4317	24867	24867	MS2	20/36	R_Col_0_1.raw
	TNMVMVFGEITTK	P17562;P23686;Q9LUT2	3	3	CID		43.3144	3.08895	1	1	3071442	2	735.842	1470.68	-38.7113	69.0451	24326	24326	MS2	22/36	R_Col_0_1.raw
	TIFHLNPSGR	P17562;P23686;Q9LUT2	3	3	CID		1	2.68799	1	1	1.29918e+06	1	1141.77	1141.77	135.728	26.7978	7680	7680	MS2	15/27	R_Col_0_1.raw
P11574	50.21	28	486	54.0736	5.09717	217.482	V-type proton ATPase subunit B1 OS=Arabidopsis thaliana GN=VHA-B1 PE=2 SV=2 - [VATB1_ARATH]
	Sequence	Protein Accessions	# Proteins	# Protein Groups	Activation Type	Modifications	Probability	XCorr	Δ Score	Rank	Intensity	Charge	m/z [Da]	MH+ [Da]	ΔM [ppm]	RT [min]	First Scan	Last Scan	MS Order	Ions Matched	Spectrum File	Annotation
	IPLFSAAGLPHNEIAAQIcR	Q9SZN1;P11574	3	2	CID	C19(Carbamidomethyl)	119.776	6.04391	1	1	625561	2	1090.02	2179.02	401.261	65.9324	23134	23134	MS2	30/57	R_Col_0_1.raw
	HVLVILTDMSSYADALR	Q9SZN1;P11574	3	2	CID		122.637	5.73226	1	1	1.32912e+06	2	952.429	1903.85	-75.3194	79.3816	28360	28360	MS2	27/48	R_Col_0_1.raw
	IFNGSGKPIDNGPPILPEAYLDISGSSINPSER	Q9SZN1;P11574	3	2	CID		39.8983	5.07538	1	1	1.50516e+06	3	1152.43	3455.28	155.083	77.8966	27782	27782	MS2	40/192	R_Col_0_1.raw
	GYPGYMYTDLATIYER	Q9SZN1;P11574	3	2	CID		87.5255	4.88743	1	1	3.21727e+06	2	957.513	1914.02	595.363	72.9627	25856	25856	MS2	23/45	R_Col_0_1.raw
	IALTTAEYLAYEcGK	Q9SZN1;P11574	3	2	CID	C13(Carbamidomethyl)	63.9799	4.7048	1	1	2370438	2	852.011	1703.01	104.739	57.0699	19653	19653	MS2	22/42	R_Col_0_1.raw
	IPLFSAAGLPHNEIAAQIcR	Q9SZN1;P11574	3	2	CID	C19(Carbamidomethyl)	300	4.61338	1	1	486843	3	726.592	2177.76	-178.498	65.8136	23086	23086	MS2	42/114	R_Col_0_1.raw
	AVVQVFEGTSGIDNK	Q9SZN1;P11574	3	2	CID		42.6653	4.59286	1	1	6.5869e+06	2	782.426	1563.84	27.7054	44.0018	14493	14493	MS2	25/42	R_Col_0_1.raw
	NIFQSLDLAWTLLR	Q9SZN1;P11574	3	2	CID		63.3364	4.58429	1	1	164089	2	845.427	1689.85	-50.4105	104.528	38150	38150	MS2	23/39	R_Col_0_1.raw
	NIFQSLDLAWTLLR	Q9SZN1;P11574	3	2	CID		53.5309	4.55201	1	1	158583	2	846.011	1691.01	639.559	104.428	38114	38114	MS2	22/39	R_Col_0_1.raw
	DHSDVSNQLYANYAIGK	Q9SZN1;P11574	3	2	CID		98.2742	4.55025	1	1	1.66914e+06	2	947.929	1894.85	-22.1183	42.5678	13928	13928	MS2	25/48	R_Col_0_1.raw
	TYPEEMIQTGISTIDVMNSIAR	Q9SZN1;P11574	3	2	CID		70.3843	4.5205	1	1	3.52477e+06	3	823.843	2469.52	127.855	93.9599	34046	34046	MS2	33/126	R_Col_0_1.raw
	KDHSDVSNQLYANYAIGK	P11574	2	1	CID		26.6306	4.36043	1	1	1.89508e+06	2	1012.51	2024.02	510.017	31.523	9553	9553	MS2	23/51	R_Col_0_1.raw
	TYPEEMIQTGISTIDVMNSIAR	Q9SZN1;P11574	3	2	CID		76.6875	4.27177	1	1	1.06929e+06	2	1235.43	2469.86	268.088	93.51	33870	33870	MS2	20/63	R_Col_0_1.raw
	IPLFSAAGLPHNEIAAQIcR	Q9SZN1;P11574	3	2	CID	C19(Carbamidomethyl)	118.433	4.21138	1	1	2.9717e+06	3	727.008	2179.01	395.27	65.3691	22910	22910	MS2	45/114	R_Col_0_1.raw
	TYPEEMIQTGISTIDVMNSIAR	Q9SZN1;P11574	3	2	CID		61.9613	4.02461	1	1	1.10717e+06	2	1235.1	2469.2	-1.83827	94.9071	34418	34418	MS2	17/63	R_Col_0_1.raw
	AVVQVFEGTSGIDNK	Q9SZN1;P11574	3	2	CID		38.5865	4.01913	1	1	2.11484e+06	2	782.926	1564.84	666.741	45.9343	15257	15257	MS2	19/42	R_Col_0_1.raw
	HVLVILTDMSSYADALR	Q9SZN1;P11574	3	2	CID		39.8622	4.01492	1	1	1.38592e+06	2	952.596	1904.18	99.7503	80.7785	28905	28905	MS2	16/48	R_Col_0_1.raw
	NIFQSLDLAWTLLR	Q9SZN1;P11574	3	2	CID		14.0384	3.91111	1	1	42054	3	564.255	1690.75	484.068	103.82	37895	37895	MS2	32/78	R_Col_0_1.raw
	VTLFLNLANDPTIER	Q9SZN1;P11574	3	2	CID		48.8326	3.82345	1	1	3037974	2	858.927	1716.85	532.916	72.5063	25677	25677	MS2	22/42	R_Col_0_1.raw
	KDHSDVSNQLYANYAIGK	P11574	2	1	CID		111.062	3.71651	1	1	1.78791e+06	2	1011.93	2022.85	-66.4434	31.5278	9555	9555	MS2	20/51	R_Col_0_1.raw
	VTLFLNLANDPTIER	Q9SZN1;P11574	3	2	CID		33.6792	3.63213	1	1	1.13927e+06	2	858.427	1715.85	-49.5866	73.8948	26219	26219	MS2	19/42	R_Col_0_1.raw
	TPVSLDMLGR	Q9SZN1;P11574	3	2	CID		29.8645	3.43606	1	1	9001819	2	544.838	1088.67	84.4515	48.6535	16330	16330	MS2	20/27	R_Col_0_1.raw
	QIYPPINVLPSLSR	Q9SZN1;P11574	3	2	CID		49.2706	3.42512	1	1	6452578	2	799.093	1597.18	167.693	72.366	25622	25622	MS2	18/39	R_Col_0_1.raw
	TVSGVAGPLVILDK	P11574	2	1	CID		25.9962	3.41229	1	1	5.44277e+06	2	685.007	1369.01	144.517	61.1983	21273	21273	MS2	20/39	R_Col_0_1.raw
	AVVGEEALSSEDLLYLEFLDK	Q9SZN1;P11574	3	2	CID		15.0595	3.3874	1	1	624050	2	1171.1	2341.19	430.24	92.6577	33538	33538	MS2	14/60	R_Col_0_1.raw
	TPVSLDMLGR	Q9SZN1;P11574	3	2	CID		50.0842	3.32773	1	1	7923495	2	545.338	1089.67	1002.1	48.5119	16274	16274	MS2	19/27	R_Col_0_1.raw
	HVLVILTDMSSYADALR	Q9SZN1;P11574	3	2	CID		38.1556	3.30689	1	1	758033	2	952.513	1904.02	12.2231	78.0083	27826	27826	MS2	15/48	R_Col_0_1.raw
	IALTTAEYLAYEcGK	Q9SZN1;P11574	3	2	CID	C13(Carbamidomethyl)	1	3.12514		2	9129.31	2	852.094	1703.18	202.586	131.397	46858	46858	MS2	14/42	R_Col_0_1.raw
Q93WJ8	48.05	22	435	47.4503	5.31299	216.602	Monodehydroascorbate reductase 2 OS=Arabidopsis thaliana GN=MDAR2 PE=1 SV=1 - [MDAR2_ARATH]
	Sequence	Protein Accessions	# Proteins	# Protein Groups	Activation Type	Modifications	Probability	XCorr	Δ Score	Rank	Intensity	Charge	m/z [Da]	MH+ [Da]	ΔM [ppm]	RT [min]	First Scan	Last Scan	MS Order	Ions Matched	Spectrum File	Annotation
	ELEDADYLAYAMETK	Q93WJ8	1	1	CID		76.7699	5.74034	1	1	2905185	2	881.511	1762.02	128.482	68.3637	24059	24059	MS2	22/42	R_Col_0_1.raw
	VVGAFLEGGSPEENNAIAK	Q93WJ8	1	1	CID		41.3998	4.81339	1	1	1.31686e+06	2	951.513	1902.02	30.2228	48.6229	16319	16319	MS2	22/54	R_Col_0_1.raw
	GTVASGFTTNSNGEVTEVK	Q93WJ8	1	1	CID		49.8202	4.33909	0.227676	1	1.10996e+06	2	949.929	1898.85	493.633	32.6245	9990	9990	MS2	24/54	R_Col_0_1.raw
	YQTLLAATGSSVIR	Q93WJ8	1	1	CID		52.4829	4.26978	1	1	4.14386e+06	2	740.425	1479.84	17.8885	49.6533	16725	16725	MS2	23/39	R_Col_0_1.raw
	VVGAFLEGGSPEENNAIAK	Q93WJ8	1	1	CID		3.35312	4.24422	1	1	3719313	2	952.096	1903.18	643.224	47.8364	16009	16009	MS2	25/54	R_Col_0_1.raw
	ANNLDVTMVYPEPWcMPR	Q93WJ8	1	1	CID	C15(Carbamidomethyl)	70.8784	4.15985	1	1	1.70209e+06	2	1097.52	2194.02	469.862	76.0991	27080	27080	MS2	21/51	R_Col_0_1.raw
	TSLPDVYAIGDVATFPMK	Q93WJ8	1	1	CID		40.3061	4.10544	1	1	3.14213e+06	2	963.346	1925.69	369.987	81.1762	29060	29060	MS2	22/51	R_Col_0_1.raw
	KVVGAFLEGGSPEENNAIAK	Q93WJ8	1	1	CID		40.7568	4.10246	1	1	2.67578e+06	2	1015.51	2030.02	-17.2461	36.8239	11652	11652	MS2	18/57	R_Col_0_1.raw
	TSLPDVYAIGDVATFPMK	Q93WJ8	1	1	CID		34.2508	4.09439	1	1	954235	3	642.757	1926.26	665.936	81.8564	29326	29326	MS2	25/102	R_Col_0_1.raw
	GTVASGFTTNSNGEVTEVK	Q93WJ8	1	1	CID		35.8912	4.06066	1	1	1.67139e+06	2	949.346	1897.68	-120.859	33.7578	10438	10438	MS2	23/54	R_Col_0_1.raw
	ANNLDVTMVYPEPWcMPR	Q93WJ8	1	1	CID	C15(Carbamidomethyl)	56.1557	3.94861	1	1	1.65767e+06	2	1097.52	2194.02	469.862	75.9154	27009	27009	MS2	19/51	R_Col_0_1.raw
	AAEEGNSIPEYDYLPYFYSR	Q93WJ8	1	1	CID		51.5939	3.86322	1	1	807630	2	1192.93	2384.86	330.756	76.5785	27267	27267	MS2	21/57	R_Col_0_1.raw
	AAEEGNSIPEYDYLPYFYSR	Q93WJ8	1	1	CID		53.0089	3.68331	1	1	1473955	2	1192.6	2384.19	51.2236	77.5268	27638	27638	MS2	22/57	R_Col_0_1.raw
	LFTAGIASFYEGYYANK	Q93WJ8	1	1	CID		25.7296	3.65079	1	1	864372	2	958.596	1916.18	656.291	75.8072	26968	26968	MS2	19/48	R_Col_0_1.raw
	LFTAGIASFYEGYYANK	Q93WJ8	1	1	CID		32.2654	3.6287	1	1	777428	2	957.929	1914.85	-39.577	75.8559	26987	26987	MS2	18/48	R_Col_0_1.raw
	TSLPDVYAIGDVATFPMK	Q93WJ8	1	1	CID		45.6243	3.61236	1	1	4.65854e+06	2	963.096	1925.19	110.363	81.5023	29187	29187	MS2	20/51	R_Col_0_1.raw
	ATLPNFYVAAGIGGER	Q93WJ8	1	1	CID		63.0022	3.44474	1	1	1.08862e+06	2	818.927	1636.85	609.171	65.1114	22810	22810	MS2	18/45	R_Col_0_1.raw
	TLEADIVIVGVGGRPIISLFK	Q93WJ8	1	1	CID		13.8597	3.32806	1	1	836191	2	1099.35	2197.69	179.607	88.57	31944	31944	MS2	15/60	R_Col_0_1.raw
	TLEADIVIVGVGGRPIISLFK	Q93WJ8	1	1	CID		1	3.30272	1	1	1104870	2	1098.93	2196.86	-199.662	88.8035	32035	32035	MS2	16/60	R_Col_0_1.raw
	AVVVGGGYIGLELGAALK	Q93WJ8	1	1	CID		1	3.14376	1	1	17378.7	2	844.344	1687.68	415.639	133.898	47669	47669	MS2	16/51	R_Col_0_1.raw
	AVVVGGGYIGLELGAALK	Q93WJ8	1	1	CID		1	3.0864		2	40573.7	2	843.927	1686.85	-78.1838	106.716	38902	38902	MS2	15/51	R_Col_0_1.raw
	AQPSVESLEVLSK	Q93WJ8	1	1	CID		34.3661	2.67566	1	1	1.17183e+06	1	1386.77	1386.77	16.923	48.1307	16125	16125	MS2	17/36	R_Col_0_1.raw
P29197	22.01	9	577	61.2422	5.78271	213.058	Chaperonin CPN60, mitochondrial OS=Arabidopsis thaliana GN=CPN60 PE=1 SV=2 - [CH60A_ARATH]
	Sequence	Protein Accessions	# Proteins	# Protein Groups	Activation Type	Modifications	Probability	XCorr	Δ Score	Rank	Intensity	Charge	m/z [Da]	MH+ [Da]	ΔM [ppm]	RT [min]	First Scan	Last Scan	MS Order	Ions Matched	Spectrum File	Annotation
	QVANATNDVAGDGTTcATVLTR	Q8L7B5;P29197	2	2	CID	C16(Carbamidomethyl)	57.9803	4.4494	1	1	1.56045e+06	2	1118.02	2235.02	-19.1223	37.3411	11858	11858	MS2	23/63	R_Col_0_1.raw
	ANLQDLAALTGGEVITDELGMNLEK	P29197	1	1	CID		103.75	4.40965	1	1	680253	2	1308.6	2616.2	334.449	94.7549	34358	34358	MS2	20/72	R_Col_0_1.raw
	LLEQDNPDLGYDAAK	Q8L7B5;P29197	2	2	CID		40.8919	3.74223	1	1	6095796	2	831.427	1661.85	26.9775	39.6758	12782	12782	MS2	20/42	R_Col_0_1.raw
	IGVQIIQNALK	Q8L7B5;P29197	2	2	CID		18.9978	3.72364	1	1	7055821	2	598.922	1196.84	84.7471	55.7002	19113	19113	MS2	17/30	R_Col_0_1.raw
	GYTSPYFITNQK	P29197	1	1	CID		36.6046	3.56657	1	1	5385918	2	710.425	1419.84	807.732	40.1754	12980	12980	MS2	19/33	R_Col_0_1.raw
	VDLSMLGTcK	P29197	1	1	CID	C9(Carbamidomethyl)	30.6057	3.36797	1	1	3.92116e+06	2	562.838	1124.67	996.65	44.6384	14745	14745	MS2	19/27	R_Col_0_1.raw
	NVVIEQSWGAPK	P29197	1	1	CID		14.778	3.32333	1	1	3752115	2	663.924	1326.84	-648.463	38.6846	12389	12389	MS2	22/33	R_Col_0_1.raw
	LLEQDNPDLGYDAAKGEYVDMVK	P29197	1	1	CID		49.6111	3.27252	1	1	666903	2	1292.85	2584.7	568.486	58.3352	20150	20150	MS2	22/66	R_Col_0_1.raw
	SVAAGMNAMDLR	Q8L7B5;P29197	2	2	CID		27.8213	3.1613	1	1	4.78372e+06	2	618.339	1235.67	68.3944	36.5415	11540	11540	MS2	20/33	R_Col_0_1.raw
P17562	36.13	21	393	43.2278	6.06201	210.417	S-adenosylmethionine synthase 2 OS=Arabidopsis thaliana GN=SAM2 PE=1 SV=1 - [METK2_ARATH]
	Sequence	Protein Accessions	# Proteins	# Protein Groups	Activation Type	Modifications	Probability	XCorr	Δ Score	Rank	Intensity	Charge	m/z [Da]	MH+ [Da]	ΔM [ppm]	RT [min]	First Scan	Last Scan	MS Order	Ions Matched	Spectrum File	Annotation
	LcDQISDAVLDAcLEQDPDSK	P17562;P23686	2	2	CID	C2(Carbamidomethyl) C13(Carbamidomethyl)	83.2966	4.87555	1	1	989685	2	1197.1	2393.19	472.044	66.1977	23237	23237	MS2	23/60	R_Col_0_1.raw
	VHTVLISTQHDETVTNDEIAR	P17562;P23686	2	2	CID		93.933	4.78084	1	1	1.56913e+06	2	1189.6	2378.19	-0.390688	31.0285	9358	9358	MS2	23/60	R_Col_0_1.raw
	TQVTVEYYNDNGAMVPVR	P17562	1	1	CID		66.589	4.54836	1	1	1.59783e+06	2	1028.43	2055.85	-61.4134	49.4068	16628	16628	MS2	22/51	R_Col_0_1.raw
	VLVNIEQQSPDIAQGVHGHFTK	P17562;P23686	2	2	CID		70.3856	4.45546	1	1	1.13445e+06	2	1209.18	2417.36	42.9994	44.3968	14651	14651	MS2	24/63	R_Col_0_1.raw
	FVIGGPHGDAGLTGR	Q9SJL8;P17562;P23686;Q9LUT2	4	4	CID		72.2735	4.32882	1	1	12443481	2	727.425	1453.84	60.4394	32.089	9776	9776	MS2	27/42	R_Col_0_1.raw
	TNMVMVFGEITTK	P17562;P23686;Q9LUT2	3	3	CID		39.3365	4.22398	1	1	14571.8	2	736.342	1471.68	640.825	123.812	44402	44402	MS2	22/36	R_Col_0_1.raw
	VHTVLISTQHDETVTNDEIAR	P17562;P23686	2	2	CID		66.7364	4.09501	1	1	3.04227e+06	3	793.426	2378.26	29.1582	30.6995	9229	9229	MS2	35/120	R_Col_0_1.raw
	SIGFISDDVGLDADKcK	P17562	1	1	CID	C16(Carbamidomethyl)	77.5103	4.06293	1	1	1.85464e+06	2	920.845	1840.68	436.795	50.761	17161	17161	MS2	23/48	R_Col_0_1.raw
	YLDDKTIFHLNPSGR	P17562	1	1	CID		32.6949	3.97079	1	1	2.34989e+06	2	888.511	1776.02	60.7637	44.1595	14557	14557	MS2	15/42	R_Col_0_1.raw
	TNMVMVFGEITTK	P17562;P23686;Q9LUT2	3	3	CID		49.7524	3.92936	1	1	17097.3	2	736.425	1471.84	753.992	114.453	41398	41398	MS2	23/36	R_Col_0_1.raw
	TNMVMVFGEITTK	P17562;P23686;Q9LUT2	3	3	CID		34.9956	3.8323	1	1	13039.6	2	736.258	1471.51	527.633	116.867	42170	42170	MS2	20/36	R_Col_0_1.raw
	TNMVMVFGEITTK	P17562;P23686;Q9LUT2	3	3	CID		34.3605	3.77898	1	1	1.00262e+06	2	736.008	1471.01	187.904	73.9542	26243	26243	MS2	21/36	R_Col_0_1.raw
	TNMVMVFGEITTK	P17562;P23686;Q9LUT2	3	3	CID		35.7265	3.53846	1	1	15521.6	2	736.342	1471.68	640.825	121.436	43637	43637	MS2	24/36	R_Col_0_1.raw
	FVIGGPHGDAGLTGR	Q9SJL8;P17562;P23686;Q9LUT2	4	4	CID		1.68402	3.4887	1	1	4.13855e+06	2	727.425	1453.84	60.4394	33.4533	10318	10318	MS2	22/42	R_Col_0_1.raw
	TNMVMVFGEITTK	P17562;P23686;Q9LUT2	3	3	CID		34.3529	3.4838	1	1	47840	2	736.342	1471.68	640.825	103.721	37858	37858	MS2	21/36	R_Col_0_1.raw
	TNMVMVFGEITTK	P17562;P23686;Q9LUT2	3	3	CID		25.4306	3.47855	1	1	944140	2	736.258	1471.51	527.633	84.1548	30223	30223	MS2	18/36	R_Col_0_1.raw
	TNMVMVFGEITTK	P17562;P23686;Q9LUT2	3	3	CID		57.6899	3.4715	1	1	8409.37	2	736.175	1471.34	414.416	132.292	47146	47146	MS2	22/36	R_Col_0_1.raw
	LcDQISDAVLDAcLEQDPDSK	P17562;P23686	2	2	CID	C2(Carbamidomethyl) C13(Carbamidomethyl)	45.0888	3.3171	1	1	260635	2	1196.43	2391.86	-85.1497	64.808	22690	22690	MS2	20/60	R_Col_0_1.raw
	TNMVMVFGEITTK	P17562;P23686;Q9LUT2	3	3	CID		24.1486	3.14456	1	1	2.76336e+06	2	735.925	1470.84	74.609	70.4317	24867	24867	MS2	20/36	R_Col_0_1.raw
	TNMVMVFGEITTK	P17562;P23686;Q9LUT2	3	3	CID		43.3144	3.08895	1	1	3071442	2	735.842	1470.68	-38.7113	69.0451	24326	24326	MS2	22/36	R_Col_0_1.raw
	TIFHLNPSGR	P17562;P23686;Q9LUT2	3	3	CID		1	2.68799	1	1	1.29918e+06	1	1141.77	1141.77	135.728	26.7978	7680	7680	MS2	15/27	R_Col_0_1.raw
Q9SZN1	49.9	26	487	54.2707	5.14795	209.927	V-type proton ATPase subunit B2 OS=Arabidopsis thaliana GN=VHA-B2 PE=1 SV=1 - [VATB2_ARATH]
	Sequence	Protein Accessions	# Proteins	# Protein Groups	Activation Type	Modifications	Probability	XCorr	Δ Score	Rank	Intensity	Charge	m/z [Da]	MH+ [Da]	ΔM [ppm]	RT [min]	First Scan	Last Scan	MS Order	Ions Matched	Spectrum File	Annotation
	IPLFSAAGLPHNEIAAQIcR	Q9SZN1;P11574	3	2	CID	C19(Carbamidomethyl)	119.776	6.04391	1	1	625561	2	1090.02	2179.02	401.261	65.9324	23134	23134	MS2	30/57	R_Col_0_1.raw
	HVLVILTDMSSYADALR	Q9SZN1;P11574	3	2	CID		122.637	5.73226	1	1	1.32912e+06	2	952.429	1903.85	-75.3194	79.3816	28360	28360	MS2	27/48	R_Col_0_1.raw
	IFNGSGKPIDNGPPILPEAYLDISGSSINPSER	Q9SZN1;P11574	3	2	CID		39.8983	5.07538	1	1	1.50516e+06	3	1152.43	3455.28	155.083	77.8966	27782	27782	MS2	40/192	R_Col_0_1.raw
	GYPGYMYTDLATIYER	Q9SZN1;P11574	3	2	CID		87.5255	4.88743	1	1	3.21727e+06	2	957.513	1914.02	595.363	72.9627	25856	25856	MS2	23/45	R_Col_0_1.raw
	IALTTAEYLAYEcGK	Q9SZN1;P11574	3	2	CID	C13(Carbamidomethyl)	63.9799	4.7048	1	1	2370438	2	852.011	1703.01	104.739	57.0699	19653	19653	MS2	22/42	R_Col_0_1.raw
	IPLFSAAGLPHNEIAAQIcR	Q9SZN1;P11574	3	2	CID	C19(Carbamidomethyl)	300	4.61338	1	1	486843	3	726.592	2177.76	-178.498	65.8136	23086	23086	MS2	42/114	R_Col_0_1.raw
	AVVQVFEGTSGIDNK	Q9SZN1;P11574	3	2	CID		42.6653	4.59286	1	1	6.5869e+06	2	782.426	1563.84	27.7054	44.0018	14493	14493	MS2	25/42	R_Col_0_1.raw
	NIFQSLDLAWTLLR	Q9SZN1;P11574	3	2	CID		63.3364	4.58429	1	1	164089	2	845.427	1689.85	-50.4105	104.528	38150	38150	MS2	23/39	R_Col_0_1.raw
	NIFQSLDLAWTLLR	Q9SZN1;P11574	3	2	CID		53.5309	4.55201	1	1	158583	2	846.011	1691.01	639.559	104.428	38114	38114	MS2	22/39	R_Col_0_1.raw
	DHSDVSNQLYANYAIGK	Q9SZN1;P11574	3	2	CID		98.2742	4.55025	1	1	1.66914e+06	2	947.929	1894.85	-22.1183	42.5678	13928	13928	MS2	25/48	R_Col_0_1.raw
	TYPEEMIQTGISTIDVMNSIAR	Q9SZN1;P11574	3	2	CID		70.3843	4.5205	1	1	3.52477e+06	3	823.843	2469.52	127.855	93.9599	34046	34046	MS2	33/126	R_Col_0_1.raw
	TYPEEMIQTGISTIDVMNSIAR	Q9SZN1;P11574	3	2	CID		76.6875	4.27177	1	1	1.06929e+06	2	1235.43	2469.86	268.088	93.51	33870	33870	MS2	20/63	R_Col_0_1.raw
	IPLFSAAGLPHNEIAAQIcR	Q9SZN1;P11574	3	2	CID	C19(Carbamidomethyl)	118.433	4.21138	1	1	2.9717e+06	3	727.008	2179.01	395.27	65.3691	22910	22910	MS2	45/114	R_Col_0_1.raw
	TYPEEMIQTGISTIDVMNSIAR	Q9SZN1;P11574	3	2	CID		61.9613	4.02461	1	1	1.10717e+06	2	1235.1	2469.2	-1.83827	94.9071	34418	34418	MS2	17/63	R_Col_0_1.raw
	AVVQVFEGTSGIDNK	Q9SZN1;P11574	3	2	CID		38.5865	4.01913	1	1	2.11484e+06	2	782.926	1564.84	666.741	45.9343	15257	15257	MS2	19/42	R_Col_0_1.raw
	HVLVILTDMSSYADALR	Q9SZN1;P11574	3	2	CID		39.8622	4.01492	1	1	1.38592e+06	2	952.596	1904.18	99.7503	80.7785	28905	28905	MS2	16/48	R_Col_0_1.raw
	NIFQSLDLAWTLLR	Q9SZN1;P11574	3	2	CID		14.0384	3.91111	1	1	42054	3	564.255	1690.75	484.068	103.82	37895	37895	MS2	32/78	R_Col_0_1.raw
	VTLFLNLANDPTIER	Q9SZN1;P11574	3	2	CID		48.8326	3.82345	1	1	3037974	2	858.927	1716.85	532.916	72.5063	25677	25677	MS2	22/42	R_Col_0_1.raw
	VTLFLNLANDPTIER	Q9SZN1;P11574	3	2	CID		33.6792	3.63213	1	1	1.13927e+06	2	858.427	1715.85	-49.5866	73.8948	26219	26219	MS2	19/42	R_Col_0_1.raw
	TPVSLDMLGR	Q9SZN1;P11574	3	2	CID		29.8645	3.43606	1	1	9001819	2	544.838	1088.67	84.4515	48.6535	16330	16330	MS2	20/27	R_Col_0_1.raw
	QIYPPINVLPSLSR	Q9SZN1;P11574	3	2	CID		49.2706	3.42512	1	1	6452578	2	799.093	1597.18	167.693	72.366	25622	25622	MS2	18/39	R_Col_0_1.raw
	AVVGEEALSSEDLLYLEFLDK	Q9SZN1;P11574	3	2	CID		15.0595	3.3874	1	1	624050	2	1171.1	2341.19	430.24	92.6577	33538	33538	MS2	14/60	R_Col_0_1.raw
	TPVSLDMLGR	Q9SZN1;P11574	3	2	CID		50.0842	3.32773	1	1	7923495	2	545.338	1089.67	1002.1	48.5119	16274	16274	MS2	19/27	R_Col_0_1.raw
	HVLVILTDMSSYADALR	Q9SZN1;P11574	3	2	CID		38.1556	3.30689	1	1	758033	2	952.513	1904.02	12.2231	78.0083	27826	27826	MS2	15/48	R_Col_0_1.raw
	TVSGVAGPLVILEK	Q9SZN1	1	1	CID		10.4032	3.28034	1	1	2.41987e+06	2	691.924	1382.84	11.4229	62.0686	21614	21614	MS2	20/39	R_Col_0_1.raw
	IALTTAEYLAYEcGK	Q9SZN1;P11574	3	2	CID	C13(Carbamidomethyl)	1	3.12514		2	9129.31	2	852.094	1703.18	202.586	131.397	46858	46858	MS2	14/42	R_Col_0_1.raw
Q9LHA8	25.54	19	650	71.057	5.24951	209.415	Probable mediator of RNA polymerase II transcription subunit 37c OS=Arabidopsis thaliana GN=MED37C PE=1 SV=1 - [MD37C_ARATH]
	Sequence	Protein Accessions	# Proteins	# Protein Groups	Activation Type	Modifications	Probability	XCorr	Δ Score	Rank	Intensity	Charge	m/z [Da]	MH+ [Da]	ΔM [ppm]	RT [min]	First Scan	Last Scan	MS Order	Ions Matched	Spectrum File	Annotation
	SINPDEAVAYGAAVQAAILSGEGNEK	O65719;P22954;Q9LHA8	4	3	CID		108.346	5.81183	1	1	1.24309e+06	2	1288.1	2575.2	360.858	85.2475	30649	30649	MS2	26/75	R_Col_0_1.raw
	IINEPTAAAIAYGLDK	O65719;Q39043;P22953;P22954;Q9LKR3;Q9LHA8;Q9S9N1	8	7	CID		59.1437	5.12424	1	1	7779391	2	831.01	1661.01	673.067	59.1819	20481	20481	MS2	25/45	R_Col_0_1.raw
	IINEPTAAAIAYGLDKK	O65719;Q39043;P22953;P22954;Q9LKR3;Q9LHA8;Q9S9N1	8	7	CID		57.9592	4.73409	1	1	6.53207e+06	2	894.595	1788.18	107.444	49.5621	16689	16689	MS2	22/48	R_Col_0_1.raw
	VQQLLQDFFNGK	P22953;P22954;Q9LHA8	4	3	CID		46.9486	4.64637	1	1	14428851	2	719.008	1437.01	177.891	68.1246	23966	23966	MS2	19/33	R_Col_0_1.raw
	ATAGDTHLGGEDFDNR	O65719;P22953;P22954;Q9LHA8;Q9S9N1	6	5	CID		78.7985	4.49341	1	1	1.97097e+06	2	838.844	1676.68	566.287	21.5813	5600	5600	MS2	27/45	R_Col_0_1.raw
	IINEPTAAAIAYGLDK	O65719;Q39043;P22953;P22954;Q9LKR3;Q9LHA8;Q9S9N1	8	7	CID		65.0135	4.30559	1	1	4935787	2	830.51	1660.01	71.0558	59.4088	20570	20570	MS2	24/45	R_Col_0_1.raw
	ATAGDTHLGGEDFDNR	O65719;P22953;P22954;Q9LHA8;Q9S9N1	6	5	CID		59.1043	4.21887	1	1	640070	2	838.844	1676.68	566.287	23.0009	6166	6166	MS2	21/45	R_Col_0_1.raw
	NQVAMNPTNTVFDAK	Q9LHA8	1	1	CID		2.72418	3.96275	1	1	3.29631e+06	2	825.51	1650.01	131.993	52.1261	17698	17698	MS2	19/42	R_Col_0_1.raw
	IINEPTAAAIAYGLDK	O65719;Q39043;P22953;P22954;Q9LKR3;Q9LHA8;Q9S9N1	8	7	CID		7.55343	3.87078	1	1	1.17761e+06	3	554.172	1660.5	364.29	59.0141	20416	20416	MS2	28/90	R_Col_0_1.raw
	NQVAMNPTNTVFDAK	Q9LHA8	1	1	CID		10.1537	3.66946		2	14005793	2	824.927	1648.85	-575.493	52.4855	17840	17840	MS2	22/42	R_Col_0_1.raw
	IINEPTAAAIAYGLDKK	O65719;Q39043;P22953;P22954;Q9LKR3;Q9LHA8;Q9S9N1	8	7	CID		13.3122	3.53776	1	1	1.88153e+06	2	894.928	1788.85	480.09	50.9496	17235	17235	MS2	14/48	R_Col_0_1.raw
	MVNHFVQEFK	O65719;P22953;P22954;Q9LHA8	5	4	CID		26.8203	3.39327	1	1	6071779	2	639.84	1278.67	33.2569	29.6359	8805	8805	MS2	19/27	R_Col_0_1.raw
	TTPSYVAFTDSER	O65719;P22953;P22954;Q9LHA8	5	4	CID		54.7868	3.34281	1	1	20016212	2	737.425	1473.84	106.739	38.225	12206	12206	MS2	21/36	R_Col_0_1.raw
	NALENYAYNMR	O65719;P22953;P22954;Q9LHA8	4	4	CID		42.6439	3.33599	1	1	26168042	2	679.841	1358.67	42.8962	41.133	13358	13358	MS2	20/30	R_Col_0_1.raw
	EQIFSTYSDNQPGVLIQVYEGER	Q9LHA8	1	1	CID		7.55074	3.11312	1	1	1.13109e+06	2	1337.19	2673.37	404.822	76.9977	27433	27433	MS2	16/66	R_Col_0_1.raw
	NQVAMNPTNTVFDAK	Q9LHA8	1	1	CID		7.75139	3.10243	1	1	5.11865e+06	2	825.427	1649.85	30.9849	41.8162	13630	13630	MS2	17/42	R_Col_0_1.raw
	VEIIANDQGNR	O65719;P22953;P22954;Q9LHA8	5	4	CID		40.7373	3.10217	1	1	311018	2	614.756	1228.5	-100.286	20.0814	5007	5007	MS2	20/30	R_Col_0_1.raw
	DAGVISGLNVMR	Q9LHA8	1	1	CID		1.94448	3.07856	1	1	3.39017e+06	2	616.423	1231.84	155.772	54.5403	18652	18652	MS2	17/33	R_Col_0_1.raw
	VQQLLQDFFNGK	P22953;P22954;Q9LHA8	4	3	CID		39.4684	2.62704	1	1	1.34992e+06	1	1436.94	1436.94	128.993	67.8757	23867	23867	MS2	16/33	R_Col_0_1.raw
Q9LF98	64.8	26	358	38.5159	6.45557	205.916	Fructose-bisphosphate aldolase 8, cytosolic OS=Arabidopsis thaliana GN=FBA8 PE=1 SV=1 - [ALFC8_ARATH]
	Sequence	Protein Accessions	# Proteins	# Protein Groups	Activation Type	Modifications	Probability	XCorr	Δ Score	Rank	Intensity	Charge	m/z [Da]	MH+ [Da]	ΔM [ppm]	RT [min]	First Scan	Last Scan	MS Order	Ions Matched	Spectrum File	Annotation
	YAVIcQENGLVPIVEPEILVDGSHDIQK	Q9LF98;Q9SJQ9	2	2	CID	C5(Carbamidomethyl)	77.6987	6.26721	0.0742222	1	15928393	3	1046.26	3136.78	374.758	80.6698	28862	28862	MS2	43/162	R_Col_0_1.raw
	GTVELAGTDGETTTQGLDGLGDR	Q9LF98	1	1	CID		68.4537	5.70147	0.266894	1	1.68291e+06	2	1131.93	2262.86	-92.9458	51.2758	17365	17365	MS2	29/66	R_Col_0_1.raw
	GTVELAGTDGETTTQGLDGLGDR	Q9LF98	1	1	CID		39.554	5.37151	1	1	2.55622e+06	2	1132.6	2264.19	495.999	51.2668	17361	17361	MS2	24/66	R_Col_0_1.raw
	IGENEPSEHSIHENAYGLAR	Q9LF98	1	1	CID		65.0697	5.26105	1	1	2.09684e+06	2	1112.35	2223.69	291.512	27.0577	7783	7783	MS2	26/57	R_Col_0_1.raw
	TVPAAVPAIVFLSGGQSEEEATR	Q9LF98;Q9SJQ9	2	2	CID		86.1832	4.94754	1	1	816085	2	1165.1	2329.19	-4.58823	76.6922	27312	27312	MS2	25/66	R_Col_0_1.raw
	ALSDHHVLLEGTLLKPNMVTPGSDSPK	Q9LF98	1	1	CID		42.0878	4.93198	1	1	961851	2	1429.27	2857.54	365.303	50.9625	17241	17241	MS2	26/78	R_Col_0_1.raw
	FADELIANAAYIGTPGK	F4KGQ0-2;Q9LF98;Q9SJQ9	3	3	CID		25.5874	4.67406	1	1	1.30912e+06	2	876.511	1752.02	635.79	65.9005	23120	23120	MS2	22/48	R_Col_0_1.raw
	GTVELAGTDGETTTQGLDGLGDR	Q9LF98	1	1	CID		41.5701	4.55635	1	1	1.71697e+06	2	1132.52	2264.02	422.419	52.6878	17922	17922	MS2	24/66	R_Col_0_1.raw
	IGENEPSEHSIHENAYGLAR	Q9LF98	1	1	CID		60.2258	4.40704	1	1	7439405	3	742.009	2224.01	435.48	25.7845	7275	7275	MS2	37/114	R_Col_0_1.raw
	FADELIANAAYIGTPGK	F4KGQ0-2;Q9LF98;Q9SJQ9	3	3	CID		53.9453	4.34196	1	1	3.10471e+06	3	584.339	1751	57.5864	66.5477	23370	23370	MS2	36/96	R_Col_0_1.raw
	GILAADESTGTIGK	F4KGQ0-2;Q9LF98;Q9SJQ9	5	3	CID		55.9214	4.20134	1	1	11486233	2	667.34	1333.67	729.555	32.8189	10065	10065	MS2	22/39	R_Col_0_1.raw
	ELLFTAPGALPcLSGVILFEETLYQK	Q9LF98	1	1	CID	C12(Carbamidomethyl)	25.9698	4.12593	1	1	32898.9	3	970.513	2909.52	-4.35559	108.344	39428	39428	MS2	31/150	R_Col_0_1.raw
	TKKPWSLSFSFGR	Q9LF98;Q9SJQ9	2	2	CID		1	4.09926	1	1	4.82624e+06	3	514.671	1542	759.25	45.2784	14996	14996	MS2	33/72	R_Col_0_1.raw
	IGENEPSEHSIHENAYGLAR	Q9LF98	1	1	CID		59.5167	3.88343	1	1	1.10869e+06	2	1111.93	2222.86	-83.2788	25.6666	7230	7230	MS2	25/57	R_Col_0_1.raw
	VDKGTVELAGTDGETTTQGLDGLGDR	Q9LF98	1	1	CID		35.6521	3.8324	1	1	1.44265e+06	2	1303.77	2606.53	488.254	46.1288	15335	15335	MS2	20/75	R_Col_0_1.raw
	FADELIANAAYIGTPGK	F4KGQ0-2;Q9LF98;Q9SJQ9	3	3	CID		31.5561	3.79	1	1	108661	2	876.094	1751.18	160.214	67.4234	23695	23695	MS2	21/48	R_Col_0_1.raw
	TVPAAVPAIVFLSGGQSEEEATR	Q9LF98;Q9SJQ9	2	2	CID		84.9854	3.77085	1	1	1.57089e+06	2	1165.02	2329.03	-76.1506	78.7313	28107	28107	MS2	22/66	R_Col_0_1.raw
	VDKGTVELAGTDGETTTQGLDGLGDR	Q9LF98	1	1	CID		75.5677	3.68118	1	1	1.3584e+06	2	1303.1	2605.2	-23.3029	46.2557	15385	15385	MS2	24/75	R_Col_0_1.raw
	GILAADESTGTIGKR	F4KGQ0-2;Q9LF98;Q9SJQ9	5	3	CID		44.3131	3.36256	1	1	4.44629e+06	2	745.425	1489.84	699.104	25.969	7349	7349	MS2	23/42	R_Col_0_1.raw
	LASINVENVETNR	Q9LF98	1	1	CID		20.8592	3.34851	1	1	5641502	2	729.925	1458.84	60.2711	36.1798	11397	11397	MS2	20/36	R_Col_0_1.raw
	GTVELAGTDGETTTQGLDGLGDR	Q9LF98	1	1	CID		2.7949	3.34075	0.0547531	1	1.28393e+06	2	1131.52	2262.02	-461.389	49.8589	16807	16807	MS2	19/66	R_Col_0_1.raw
	YAVIcQENGLVPIVEPEILVDGSHDIQK	Q9LF98;Q9SJQ9	2	2	CID	C5(Carbamidomethyl)	65.6974	3.31852	1	1	1.07248e+06	2	1568.77	3136.54	299.243	80.6078	28839	28839	MS2	17/81	R_Col_0_1.raw
	ELLFTAPGALPcLSGVILFEETLYQK	Q9LF98	1	1	CID	C12(Carbamidomethyl)	67.2495	3.18042	1	1	36945.2	2	1455.11	2909.2	-114.448	106.913	38968	38968	MS2	16/75	R_Col_0_1.raw
	VSPEVIAEHTVR	Q9LF98	1	1	CID		40.218	3.13537	1	1	17217088	2	668.924	1336.84	88.512	27.9978	8156	8156	MS2	20/33	R_Col_0_1.raw
	GILAADESTGTIGKR	F4KGQ0-2;Q9LF98;Q9SJQ9	5	3	CID		17.7652	3.11417	1	1	5.04368e+06	2	745.425	1489.84	699.104	24.5205	6771	6771	MS2	19/42	R_Col_0_1.raw
	LGDGAAESLHVK	Q9LF98	1	1	CID		42.1465	3.09397	1	1	530814	2	598.839	1196.67	36.6923	20.3547	5114	5114	MS2	18/33	R_Col_0_1.raw
P23686	34.86	20	393	43.1307	5.8208	202.772	S-adenosylmethionine synthase 1 OS=Arabidopsis thaliana GN=SAM1 PE=1 SV=2 - [METK1_ARATH]
	Sequence	Protein Accessions	# Proteins	# Protein Groups	Activation Type	Modifications	Probability	XCorr	Δ Score	Rank	Intensity	Charge	m/z [Da]	MH+ [Da]	ΔM [ppm]	RT [min]	First Scan	Last Scan	MS Order	Ions Matched	Spectrum File	Annotation
	LcDQISDAVLDAcLEQDPDSK	P17562;P23686	2	2	CID	C2(Carbamidomethyl) C13(Carbamidomethyl)	83.2966	4.87555	1	1	989685	2	1197.1	2393.19	472.044	66.1977	23237	23237	MS2	23/60	R_Col_0_1.raw
	VHTVLISTQHDETVTNDEIAR	P17562;P23686	2	2	CID		93.933	4.78084	1	1	1.56913e+06	2	1189.6	2378.19	-0.390688	31.0285	9358	9358	MS2	23/60	R_Col_0_1.raw
	VLVNIEQQSPDIAQGVHGHFTK	P17562;P23686	2	2	CID		70.3856	4.45546	1	1	1.13445e+06	2	1209.18	2417.36	42.9994	44.3968	14651	14651	MS2	24/63	R_Col_0_1.raw
	FVIGGPHGDAGLTGR	Q9SJL8;P17562;P23686;Q9LUT2	4	4	CID		72.2735	4.32882	1	1	12443481	2	727.425	1453.84	60.4394	32.089	9776	9776	MS2	27/42	R_Col_0_1.raw
	TNMVMVFGEITTK	P17562;P23686;Q9LUT2	3	3	CID		39.3365	4.22398	1	1	14571.8	2	736.342	1471.68	640.825	123.812	44402	44402	MS2	22/36	R_Col_0_1.raw
	VHTVLISTQHDETVTNDEIAR	P17562;P23686	2	2	CID		66.7364	4.09501	1	1	3.04227e+06	3	793.426	2378.26	29.1582	30.6995	9229	9229	MS2	35/120	R_Col_0_1.raw
	TNMVMVFGEITTK	P17562;P23686;Q9LUT2	3	3	CID		49.7524	3.92936	1	1	17097.3	2	736.425	1471.84	753.992	114.453	41398	41398	MS2	23/36	R_Col_0_1.raw
	TQVTVEYYNDKGAMVPIR	P23686	1	1	CID		55.0932	3.8585	1	1	1608984	2	1042.51	2084.02	-12.8288	44.6728	14760	14760	MS2	18/51	R_Col_0_1.raw
	TNMVMVFGEITTK	P17562;P23686;Q9LUT2	3	3	CID		34.9956	3.8323	1	1	13039.6	2	736.258	1471.51	527.633	116.867	42170	42170	MS2	20/36	R_Col_0_1.raw
	TNMVMVFGEITTK	P17562;P23686;Q9LUT2	3	3	CID		34.3605	3.77898	1	1	1.00262e+06	2	736.008	1471.01	187.904	73.9542	26243	26243	MS2	21/36	R_Col_0_1.raw
	TNMVMVFGEITTK	P17562;P23686;Q9LUT2	3	3	CID		35.7265	3.53846	1	1	15521.6	2	736.342	1471.68	640.825	121.436	43637	43637	MS2	24/36	R_Col_0_1.raw
	FVIGGPHGDAGLTGR	Q9SJL8;P17562;P23686;Q9LUT2	4	4	CID		1.68402	3.4887	1	1	4.13855e+06	2	727.425	1453.84	60.4394	33.4533	10318	10318	MS2	22/42	R_Col_0_1.raw
	TNMVMVFGEITTK	P17562;P23686;Q9LUT2	3	3	CID		34.3529	3.4838	1	1	47840	2	736.342	1471.68	640.825	103.721	37858	37858	MS2	21/36	R_Col_0_1.raw
	TNMVMVFGEITTK	P17562;P23686;Q9LUT2	3	3	CID		25.4306	3.47855	1	1	944140	2	736.258	1471.51	527.633	84.1548	30223	30223	MS2	18/36	R_Col_0_1.raw
	TNMVMVFGEITTK	P17562;P23686;Q9LUT2	3	3	CID		57.6899	3.4715	1	1	8409.37	2	736.175	1471.34	414.416	132.292	47146	47146	MS2	22/36	R_Col_0_1.raw
	LcDQISDAVLDAcLEQDPDSK	P17562;P23686	2	2	CID	C2(Carbamidomethyl) C13(Carbamidomethyl)	45.0888	3.3171	1	1	260635	2	1196.43	2391.86	-85.1497	64.808	22690	22690	MS2	20/60	R_Col_0_1.raw
	TNMVMVFGEITTK	P17562;P23686;Q9LUT2	3	3	CID		24.1486	3.14456	1	1	2.76336e+06	2	735.925	1470.84	74.609	70.4317	24867	24867	MS2	20/36	R_Col_0_1.raw
	AIGFVSDDVGLDADKcK	P23686	1	1	CID	C16(Carbamidomethyl)	29.753	3.13422	1	1	1.66275e+06	2	905.845	1810.68	449.543	44.0583	14516	14516	MS2	19/48	R_Col_0_1.raw
	TNMVMVFGEITTK	P17562;P23686;Q9LUT2	3	3	CID		43.3144	3.08895	1	1	3071442	2	735.842	1470.68	-38.7113	69.0451	24326	24326	MS2	22/36	R_Col_0_1.raw
	TIFHLNPSGR	P17562;P23686;Q9LUT2	3	3	CID		1	2.68799	1	1	1.29918e+06	1	1141.77	1141.77	135.728	26.7978	7680	7680	MS2	15/27	R_Col_0_1.raw
Q96292	47.48	19	377	41.8499	5.57959	201.094	Actin-2 OS=Arabidopsis thaliana GN=ACT2 PE=1 SV=1 - [ACT2_ARATH]
	Sequence	Protein Accessions	# Proteins	# Protein Groups	Activation Type	Modifications	Probability	XCorr	Δ Score	Rank	Intensity	Charge	m/z [Da]	MH+ [Da]	ΔM [ppm]	RT [min]	First Scan	Last Scan	MS Order	Ions Matched	Spectrum File	Annotation
	TTGIVLDSGDGVSHTVPIYEGFSLPHAILR	Q96292	2	1	CID		98.5415	6.10586	0.00529632	1	1.13566e+06	3	1051.43	3152.28	201.973	76.848	27373	27373	MS2	43/174	R_Col_0_1.raw
	TTGIVLDSGDGVSHTVPIYEGFSLPHAILR	Q96292	2	1	CID		32.9793	5.86915		2	1.95364e+06	3	1051.6	3152.78	360.535	71.4649	25271	25271	MS2	39/174	R_Col_0_1.raw
	LSFVAVDYEQEMETSK	Q96292	2	1	CID		85.3571	5.32654	1	1	857970	2	938.512	1876.02	79.5683	62.8528	21923	21923	MS2	24/45	R_Col_0_1.raw
	TTGIVLDSGDGVSHTVPIYEGFSLPHAILR	Q96292	2	1	CID		109.376	5.31846	0.0345771	1	0	3	1050.84	3150.51	-359.624	77.3746	27580	27580	MS2	38/174	R_Col_0_1.raw
	YPIEHGVVSNWDDMEK	Q96292;Q8RYC2	3	2	CID		70.1856	5.03222	1	1	1.22811e+06	2	959.596	1918.18	-354.067	46.5322	15494	15494	MS2	24/45	R_Col_0_1.raw
	YPIEHGVVSNWDDMEK	Q96292;Q8RYC2	3	2	CID		31.9673	4.67199	1	1	1.7035e+06	2	960.513	1920.02	601.141	45.0309	14901	14901	MS2	24/45	R_Col_0_1.raw
	YPIEHGVVSNWDDMEK	Q96292;Q8RYC2	3	2	CID		21.2643	4.43304	1	1	10113361	3	640.34	1919.01	73.5398	45.7367	15177	15177	MS2	31/90	R_Col_0_1.raw
	YPIEHGVVSNWDDMEK	Q96292;Q8RYC2	3	2	CID		13.7724	4.21947	1	1	1.52517e+06	2	960.346	1919.68	427.603	46.4704	15469	15469	MS2	20/45	R_Col_0_1.raw
	IWHHTFYNELR	P53492;Q96292;Q8RYC2	8	3	CID		17.3332	4.00235	1	1	9505196	3	506.254	1516.75	658.134	27.7711	8066	8066	MS2	28/60	R_Col_0_1.raw
	NYELPDGQVITIGAER	P53492;Q96292	3	2	CID		13.2818	3.96591	1	1	523388	2	888.428	1775.85	535.934	63.8948	22332	22332	MS2	17/45	R_Col_0_1.raw
	cPEVLFQPSFVGMEAAGIHETTYNSIMK	Q96292	2	1	CID	C1(Carbamidomethyl)	10.5108	3.95938	1	1	1.62346e+06	3	1052.51	3155.53	-302.62	80.3571	28741	28741	MS2	26/162	R_Col_0_1.raw
	NYELPDGQVITIGAER	P53492;Q96292	3	2	CID		74.5084	3.90565	1	1	11503063	2	887.928	1774.85	-27.2034	62.3866	21740	21740	MS2	23/45	R_Col_0_1.raw
	IAPEEHPVLLTEAPLNPK	Q96292	2	1	CID		57.2833	3.78877	1	1	1.49024e+06	2	984.513	1968.02	-30.9698	48.1669	16139	16139	MS2	19/51	R_Col_0_1.raw
	DLYGNIVLSGGTTMFSGIADR	Q96292	2	1	CID		6.14758	3.66992	1	1	26414.1	2	1094.27	2187.52	204.933	110.458	40106	40106	MS2	19/60	R_Col_0_1.raw
	LSFVAVDYEQEMETSK	Q96292	2	1	CID		68.1129	3.49486	1	1	320061	2	937.929	1874.85	-542.666	63.1426	22038	22038	MS2	16/45	R_Col_0_1.raw
	AEYDEAGPGIVHR	Q96292	2	1	CID		37.3613	3.3563	1	1	844614	2	706.841	1412.68	-708.339	22.1358	5823	5823	MS2	23/36	R_Col_0_1.raw
	LSFVAVDYEQEMETSK	Q96292	2	1	CID		24.9251	3.15236	1	1	101474	2	938.846	1876.68	434.783	103.436	37751	37751	MS2	13/45	R_Col_0_1.raw
	DLYGNIVLSGGTTMFSGIADR	Q96292	2	1	CID		4.71345	3.14455	1	1	14621.3	2	1094.52	2188.02	433.408	129.269	46166	46166	MS2	15/60	R_Col_0_1.raw
	GYMFTTTAER	P53492;Q96292	3	2	CID		35.749	3.10098	1	1	11070901	2	588.839	1176.67	114.843	31.1338	9398	9398	MS2	20/27	R_Col_0_1.raw
Q9SIB9	21.72	18	990	108.133	7.1665	199.84	Aconitate hydratase 3, mitochondrial OS=Arabidopsis thaliana GN=ACO3 PE=1 SV=2 - [ACO3M_ARATH]
	Sequence	Protein Accessions	# Proteins	# Protein Groups	Activation Type	Modifications	Probability	XCorr	Δ Score	Rank	Intensity	Charge	m/z [Da]	MH+ [Da]	ΔM [ppm]	RT [min]	First Scan	Last Scan	MS Order	Ions Matched	Spectrum File	Annotation
	WGSTAFQNMLVVPPGSGIVHQVNLEYLGR	Q94A28;Q9SIB9	2	2	CID		22.6123	5.18841	1	1	921714	3	1057.43	3170.28	206.324	87.3329	31462	31462	MS2	35/168	R_Col_0_1.raw
	NGVTATDLVLTVTQMLR	Q9SIB9	1	1	CID		55.7647	4.40262	1	1	1.41216e+06	2	916.595	1832.18	102.905	100.402	36569	36569	MS2	20/48	R_Col_0_1.raw
	WGSTAFQNMLVVPPGSGIVHQVNLEYLGR	Q94A28;Q9SIB9	2	2	CID		1	4.11332	1	1	515419	3	1057.01	3169.03	-188.045	85.9053	30907	30907	MS2	29/168	R_Col_0_1.raw
	SGEDADTLGLTGHER	Q9SIB9	1	1	CID		61.4654	4.07336	1	1	1547875	2	779.426	1557.84	83.8151	23.6225	6416	6416	MS2	22/42	R_Col_0_1.raw
	NGVTATDLVLTVTQMLR	Q9SIB9	1	1	CID		36.1127	4.05414	1	1	546025	3	611.673	1833	550.37	99.4491	36195	36195	MS2	34/96	R_Col_0_1.raw
	NGVTATDLVLTVTQMLR	Q9SIB9	1	1	CID		35.4902	4.04781	1	1	826120	3	611.339	1832	4.80927	99.7588	36316	36316	MS2	32/96	R_Col_0_1.raw
	DIWPTTEEIAEVVQSSVLPDMFR	Q9SIB9	1	1	CID		36.0631	4.01376	1	1	23774.2	2	1332.19	2663.37	397.6	112.104	40638	40638	MS2	23/66	R_Col_0_1.raw
	VLLQDFTGVPAVVDLAcMR	Q9SIB9;Q42560	2	2	CID	C17(Carbamidomethyl)	14.2024	3.86495	1	1	1.02971e+06	3	702.424	2105.26	553.724	90.4631	32680	32680	MS2	29/108	R_Col_0_1.raw
	FDTEVELAYFNHGGILPYVIR	Q9SIB9	1	1	CID		6.73381	3.80357	1	1	922687	2	1226.93	2452.86	-158.243	85.6342	30801	30801	MS2	16/60	R_Col_0_1.raw
	VYSSYLELNLDDVEPcISGPK	Q9SIB9	1	1	CID	C16(Carbamidomethyl)	41.1186	3.77175	1	1	715223	2	1199.6	2398.19	19.1118	78.1153	27868	27868	MS2	21/60	R_Col_0_1.raw
	VYSSYLELNLDDVEPcISGPK	Q9SIB9	1	1	CID	C16(Carbamidomethyl)	38.132	3.64936	1	1	986973	2	1200.18	2399.36	505.352	79.5485	28426	28426	MS2	21/60	R_Col_0_1.raw
	SNLVGMGIIPLcFK	Q9SIB9;Q42560	2	2	CID	C12(Carbamidomethyl)	9.57396	3.46621	1	1	3.43033e+06	2	775.509	1550.01	763.454	81.8235	29312	29312	MS2	20/39	R_Col_0_1.raw
	VVNFSFDGQPAELK	Q9SIB9	1	1	CID		33.0232	3.44065	1	1	4.44641e+06	2	775.926	1550.84	38.3375	56.2997	19350	19350	MS2	19/39	R_Col_0_1.raw
	SENAVQANMELEFQR	Q9SIB9;Q42560	2	2	CID		42.1162	3.338	1	1	1.17312e+06	2	883.511	1766.02	112.023	52.102	17690	17690	MS2	16/42	R_Col_0_1.raw
	NcDNFQVTKEDVEK	Q9SIB9	1	1	CID	C2(Carbamidomethyl)	7.88399	3.32768	1	1	585386	2	863.844	1726.68	524.871	22.8638	6111	6111	MS2	17/39	R_Col_0_1.raw
	VLLQDFTGVPAVVDLAcMR	Q9SIB9;Q42560	2	2	CID	C17(Carbamidomethyl)	129.824	3.22501	1	1	370344	2	1052.1	2103.19	-430.1	91.2152	32975	32975	MS2	27/54	R_Col_0_1.raw
	SENAVQANMELEFQR	Q9SIB9;Q42560	2	2	CID		54.2142	3.14958	1	1	2459562	2	883.511	1766.02	112.023	50.4987	17058	17058	MS2	20/42	R_Col_0_1.raw
	SDETVAMIEAYLR	Q9SIB9	1	1	CID		38.9757	3.1002	1	1	1.25918e+06	2	749.342	1497.68	-32.4967	79.7943	28521	28521	MS2	17/36	R_Col_0_1.raw
Q9C525-2	22.41	14	522	59.4558	7.02002	194.88	Isoform 2 of Beta-glucosidase 21 OS=Arabidopsis thaliana GN=BGLU21 - [BGL21_ARATH]
	Sequence	Protein Accessions	# Proteins	# Protein Groups	Activation Type	Modifications	Probability	XCorr	Δ Score	Rank	Intensity	Charge	m/z [Da]	MH+ [Da]	ΔM [ppm]	RT [min]	First Scan	Last Scan	MS Order	Ions Matched	Spectrum File	Annotation
	LGTTDSVDVGTADHNR	Q9C525-2	2	1	CID		73.0808	4.56799	1	1	126149	2	829.344	1657.68	-59.0131	19.4821	4778	4778	MS2	22/45	R_Col_0_1.raw
	cSGDHADVAVDFFHR	Q9C525-2	2	1	CID	C1(Carbamidomethyl)	19.3155	3.85596	0.03682	1	3.13422e+06	3	578.339	1733	145.35	33.5939	10372	10372	MS2	27/84	R_Col_0_1.raw
	DKYANPEIMIMENGYGDK	Q9C525-2;Q9C8Y9	4	2	CID		77.2376	3.73143	1	1	1.80021e+06	2	1044.6	2088.19	118.209	53.7412	18336	18336	MS2	20/51	R_Col_0_1.raw
	NVDHSAIGSMPLTAALPVYAK	Q9C525-2	2	1	CID		44.0468	3.69818	1	1	3481839	2	1078.1	2155.19	31.4532	63.9165	22340	22340	MS2	23/60	R_Col_0_1.raw
	FGLYYVDFK	Q9C525-2;Q9SR37;Q9C8Y9	4	3	CID		27.8938	3.63347	1	1	4.3597e+06	2	576.339	1151.67	80.6466	67.3277	23659	23659	MS2	16/24	R_Col_0_1.raw
	GVSQAGVQFYHELIDELLK	Q9C525-2	2	1	CID		78.4755	3.44553	1	1	1.0349e+06	2	1073.1	2145.19	-432.916	92.9337	33646	33646	MS2	18/54	R_Col_0_1.raw
	DKYANPEIMIMENGYGDK	Q9C525-2;Q9C8Y9	4	2	CID		16.4904	3.39391	1	1	975662	2	1044.51	2088.02	38.3961	55.156	18897	18897	MS2	20/51	R_Col_0_1.raw
	FGLYYVDFK	Q9C525-2;Q9SR37;Q9C8Y9	4	3	CID		26.0293	3.30612	1	1	52799068	2	576.422	1151.84	225.334	65.7611	23064	23064	MS2	19/24	R_Col_0_1.raw
	GPALWDIYcR	Q9C525-2;Q9SR37	3	2	CID	C9(Carbamidomethyl)	37.1523	3.28988	1	1	4.82995e+06	2	626.423	1251.84	990.526	60.1419	20858	20858	MS2	18/27	R_Col_0_1.raw
	NVDHSAIGSMPLTAALPVYAK	Q9C525-2	2	1	CID		1	3.1931	1	1	491704	2	1078.77	2156.52	649.725	63.7536	22277	22277	MS2	18/60	R_Col_0_1.raw
	GPALWDIYcR	Q9C525-2;Q9SR37	3	2	CID	C9(Carbamidomethyl)	45.0534	3.1794	1	1	1528520	2	625.173	1249.34	-1008.59	58.77	20320	20320	MS2	21/27	R_Col_0_1.raw
	YKEDIQLMK	Q9SE50-2;Q9C525-2;Q9SR37;Q9C8Y9	9	4	CID		11.926	3.10892		2	16943096	2	584.339	1167.67	53.5406	24.2006	6644	6644	MS2	16/24	R_Col_0_1.raw
	FGLYYVDFK	Q9C525-2;Q9SR37;Q9C8Y9	4	3	CID		43.2395	2.58811	1	1	388589	1	1150.77	1150.77	-704.527	65.316	22890	22890	MS2	15/24	R_Col_0_1.raw
	YKEDIQLMK	Q9SE50-2;Q9C525-2;Q9SR37;Q9C8Y9	9	4	CID		10.9376	2.54361		2	946275	1	1167.6	1167.6	-6.6439	24.1788	6637	6637	MS2	13/24	R_Col_0_1.raw
O04499	38.06	13	557	60.5417	5.52881	192.754	2,3-bisphosphoglycerate-independent phosphoglycerate mutase 1 OS=Arabidopsis thaliana GN=PGM1 PE=2 SV=3 - [PMG1_ARATH]
	Sequence	Protein Accessions	# Proteins	# Protein Groups	Activation Type	Modifications	Probability	XCorr	Δ Score	Rank	Intensity	Charge	m/z [Da]	MH+ [Da]	ΔM [ppm]	RT [min]	First Scan	Last Scan	MS Order	Ions Matched	Spectrum File	Annotation
	LQILTSHTLKPVPIAIGGPGLAQGVR	O04499	1	1	CID		53.6057	5.33542	1	1	3.41499e+06	3	879.928	2637.77	457.942	62.2085	21669	21669	MS2	33/150	R_Col_0_1.raw
	DVLDGSSVGFVETLEADLVALR	O04499	1	1	CID		73.6499	5.04509	1	1	17106.1	2	1153.68	2306.36	505.892	109.94	39941	39941	MS2	24/63	R_Col_0_1.raw
	YVSESFETNTLHLVGLLSDGGVHSR	O04499	1	1	CID		99.5796	4.79287	1	1	1.14728e+06	3	906.845	2718.52	429.508	75.8695	26991	26991	MS2	36/144	R_Col_0_1.raw
	KEPGANDQYLPPFVIVDESGK	O04499	1	1	CID		29.5094	4.36764	1	1	1.32212e+06	2	1152.1	2303.19	15.9953	62.9954	21980	21980	MS2	22/60	R_Col_0_1.raw
	TSGEYLTHNGVSTFAcSETVK	O04499	1	1	CID	C16(Carbamidomethyl)	59.807	4.12512	1	1	1572172	2	1144.52	2288.03	-10.7664	37.7008	12002	12002	MS2	22/60	R_Col_0_1.raw
	LEEYVEIPSDSGISFNVQPK	Q9M9K1;O04499	2	2	CID		15.5002	4.11449	1	1	2.44479e+06	2	1126.02	2251.02	-39.2201	70.8489	25030	25030	MS2	25/57	R_Col_0_1.raw
	GIYVVTADHGNAEDMVK	O04499	1	1	CID		49.1164	4.11178	1	1	1.99402e+06	2	910.428	1819.85	538.785	36.7937	11641	11641	MS2	22/48	R_Col_0_1.raw
	ENGVDAQIASGGGR	O04499	1	1	CID		38.6153	3.75	1	1	211950	2	665.924	1330.84	154.452	19.5214	4792	4792	MS2	19/39	R_Col_0_1.raw
	GWDAQVLGEAPHK	Q9M9K1;O04499	2	2	CID		40.437	3.7078	1	1	6.72933e+06	2	704.508	1408.01	217.868	35.3246	11055	11055	MS2	20/36	R_Col_0_1.raw
	GIYVVTADHGNAEDMVK	O04499	1	1	CID		28.3061	3.35102	1	1	4.13553e+06	2	909.512	1818.02	-469.116	36.8167	11649	11649	MS2	16/48	R_Col_0_1.raw
	YAGMLQYDGELKLPSR	Q9M9K1;O04499	2	2	CID		29.9815	3.29904	1	1	1.75889e+06	2	921.429	1841.85	501.574	55.1448	18892	18892	MS2	20/45	R_Col_0_1.raw
	AVGPIVDGDAVVTFNFR	Q9M9K1;O04499	2	2	CID		6.43555	3.22673	1	1	929944	2	889.428	1777.85	517.955	79.5619	28430	28430	MS2	17/48	R_Col_0_1.raw
	EPGANDQYLPPFVIVDESGK	O04499	1	1	CID		1.84234	3.12096	1	1	1.20103e+06	2	1087.93	2174.86	-93.8017	75.1487	26708	26708	MS2	14/57	R_Col_0_1.raw
P48491	59.45	23	254	27.1521	5.50342	191.756	Triosephosphate isomerase, cytosolic OS=Arabidopsis thaliana GN=CTIMC PE=1 SV=2 - [TPIS_ARATH]
	Sequence	Protein Accessions	# Proteins	# Protein Groups	Activation Type	Modifications	Probability	XCorr	Δ Score	Rank	Intensity	Charge	m/z [Da]	MH+ [Da]	ΔM [ppm]	RT [min]	First Scan	Last Scan	MS Order	Ions Matched	Spectrum File	Annotation
	AILNESSEFVGDKVAYALAQGLK	P48491	1	1	CID		97.9622	6.39046	1	1	659231	2	1212.35	2423.69	170.36	79.8611	28548	28548	MS2	30/66	R_Col_0_1.raw
	VTNWSNVVIAYEPVWAIGTGK	P48491	1	1	CID		57.9721	5.6625	1	1	3.48916e+06	2	1152.68	2304.36	67.9796	89.8589	32445	32445	MS2	22/60	R_Col_0_1.raw
	AILNESSEFVGDKVAYALAQGLK	P48491	1	1	CID		122.802	5.59203	1	1	3.57741e+06	3	808.927	2424.76	611.686	80.3477	28737	28737	MS2	43/132	R_Col_0_1.raw
	VTNWSNVVIAYEPVWAIGTGK	P48491	1	1	CID		67.2334	5.52986	1	1	2.40066e+06	3	769.092	2305.26	459.936	89.7166	32390	32390	MS2	38/120	R_Col_0_1.raw
	VASPAQAQEVHDELRK	P48491	1	1	CID		81.8813	5.10725	1	1	152888	2	889.928	1778.85	522.616	19.9454	4955	4955	MS2	25/45	R_Col_0_1.raw
	VTNWSNVVIAYEPVWAIGTGK	P48491	1	1	CID		67.4085	4.97803	1	1	1.25676e+06	2	1152.6	2304.19	-4.34878	88.4898	31913	31913	MS2	25/60	R_Col_0_1.raw
	SDFFVAAQNcWVK	P48491	1	1	CID	C10(Carbamidomethyl)	55.5394	4.66103	1	1	5611329	2	786.926	1572.84	708.078	62.5229	21794	21794	MS2	22/36	R_Col_0_1.raw
	AILNESSEFVGDKVAYALAQGLK	P48491	1	1	CID		49.5316	4.49868	1	1	1333924	2	1211.6	2422.19	-448.819	80.6564	28858	28858	MS2	19/66	R_Col_0_1.raw
	EAGSTMDVVAAQTK	P48491	1	1	CID		52.5343	4.48408	1	1	11755143	2	704.341	1407.68	-2.46524	25.4642	7148	7148	MS2	20/39	R_Col_0_1.raw
	EAGSTMDVVAAQTK	P48491	1	1	CID		31.888	4.13905	1	1	5324739	2	704.924	1408.84	825.656	26.9591	7743	7743	MS2	19/39	R_Col_0_1.raw
	AILNESSEFVGDK	P48491	1	1	CID		65.6887	4.11567	1	1	12868052	2	704.841	1408.68	-14.532	39.7232	12800	12800	MS2	20/36	R_Col_0_1.raw
	VIAcVGETLEER	P48491	1	1	CID	C4(Carbamidomethyl)	53.5925	3.86906	1	1	11392507	2	688.341	1375.67	-10.3609	37.0894	11757	11757	MS2	23/33	R_Col_0_1.raw
	VIAcVGETLEEREAGSTMDVVAAQTK	P48491	1	1	CID	C4(Carbamidomethyl)	11.0861	3.74587	1	1	646200	3	922.512	2765.52	423.877	56.5332	19440	19440	MS2	35/150	R_Col_0_1.raw
	VIAcVGETLEER	P48491	1	1	CID	C4(Carbamidomethyl)	22.0576	3.68477	1	1	7213188	2	688.424	1375.84	110.781	38.4511	12296	12296	MS2	21/33	R_Col_0_1.raw
	NVSADVAATTR	P48491	1	1	CID		35.6874	3.64924	1	1	186214	2	553.255	1105.5	848.563	18.5182	4413	4413	MS2	21/30	R_Col_0_1.raw
	IIYGGSVNGGNcK	P48491	1	1	CID	C12(Carbamidomethyl)	63.3917	3.6258	1	1	278605	2	670.34	1339.67	766.306	19.5668	4809	4809	MS2	21/36	R_Col_0_1.raw
	ELGGQADVDGFLVGGASLKPEFIDIIK	P48491	1	1	CID		4.48481	3.58075	1	1	1.03542e+06	2	1394.69	2788.37	-38.9113	88.8703	32062	32062	MS2	16/78	R_Col_0_1.raw
	IIYGGSVNGGNcK	P48491	1	1	CID	C12(Carbamidomethyl)	48.1808	3.4445	1	1	337330	2	669.757	1338.51	-104.66	19.6147	4827	4827	MS2	22/36	R_Col_0_1.raw
	EAGSTMDVVAAQTK	P48491	1	1	CID		11.5032	3.42296	1	1	4120572	2	704.841	1408.68	707.437	25.285	7077	7077	MS2	15/39	R_Col_0_1.raw
	SDFFVAAQNcWVK	P48491	1	1	CID	C10(Carbamidomethyl)	47.3367	3.40339	1	1	707755	2	785.926	1570.84	-564.245	62.9097	21946	21946	MS2	20/36	R_Col_0_1.raw
	VIAcVGETLEER	P48491	1	1	CID	C4(Carbamidomethyl)	1	3.23865	1	1	4202765	2	688.424	1375.84	110.781	41.4574	13487	13487	MS2	14/33	R_Col_0_1.raw
	AILNESSEFVGDK	P48491	1	1	CID		23.5911	3.23593	1	1	4532596	2	705.425	1409.84	813.012	39.4071	12676	12676	MS2	19/36	R_Col_0_1.raw
	RAILNESSEFVGDK	P48491	1	1	CID		42.5525	3.09394	1	1	2.23826e+06	2	782.843	1564.68	-75.7815	29.2332	8648	8648	MS2	20/39	R_Col_0_1.raw
Q9M9P3	36.67	13	469	51.7061	6.12549	189.078	UTP--glucose-1-phosphate uridylyltransferase 2 OS=Arabidopsis thaliana GN=UGP2 PE=1 SV=1 - [UGPA2_ARATH]
	Sequence	Protein Accessions	# Proteins	# Protein Groups	Activation Type	Modifications	Probability	XCorr	Δ Score	Rank	Intensity	Charge	m/z [Da]	MH+ [Da]	ΔM [ppm]	RT [min]	First Scan	Last Scan	MS Order	Ions Matched	Spectrum File	Annotation
	ASSDLLLVQSDLYTLVDGFVTR	Q9M9P3	1	1	CID		42.9373	4.8855		2	54447	2	1207.02	2413.03	315.797	106.629	38874	38874	MS2	25/63	R_Col_0_1.raw
	VQLLEIAQVPDEHVNEFK	Q9M9P3	2	1	CID		47.8852	4.44901	1	1	1.09383e+06	2	1054.51	2108.02	-38.1549	63.0002	21982	21982	MS2	21/51	R_Col_0_1.raw
	YTNSNVDIHTFNQSK	Q9M9P3	1	1	CID		75.6061	3.95251	1	1	943777	2	884.428	1767.85	10.7321	24.3029	6685	6685	MS2	17/42	R_Col_0_1.raw
	SAVDGLTEMSESEK	Q9M9P3	1	1	CID		52.1512	3.87244	1	1	1.43347e+06	2	741.592	1482.18	-328.193	35.6194	11172	11172	MS2	21/39	R_Col_0_1.raw
	LNGGLGTTMGcTGPK	Q9M9P3	2	1	CID	C11(Carbamidomethyl)	8.98499	3.84755	1	1	9637520	2	732.425	1463.84	98.7734	27.2738	7868	7868	MS2	15/42	R_Col_0_1.raw
	IFNTNNLWVNLK	Q9M9P3	2	1	CID		25.2328	3.80753	1	1	2.63527e+06	2	738.425	1475.84	28.753	68.5877	24147	24147	MS2	20/33	R_Col_0_1.raw
	TDKEGWYPPGHGDVFPALMNSGK	Q9M9P3	1	1	CID		15.3555	3.74819	1	1	759310	3	834.76	2502.27	-361.558	56.282	19344	19344	MS2	25/132	R_Col_0_1.raw
	IQTPTDEIVVPYEK	Q9M9P3	1	1	CID		15.1041	3.56624	1	1	4.19731e+06	2	816.51	1632.01	98.0152	51.8916	17606	17606	MS2	20/39	R_Col_0_1.raw
	IFNTNNLWVNLK	Q9M9P3	2	1	CID		28.0208	3.4047	1	1	1.36192e+06	2	739.008	1477.01	818.63	67.7142	23802	23802	MS2	14/33	R_Col_0_1.raw
	VPLVLMNSFNTHDDTHK	Q9M9P3	1	1	CID		35.4334	3.39785	1	1	2.11427e+06	2	984.43	1967.85	-56.8737	43.6517	14355	14355	MS2	15/48	R_Col_0_1.raw
	VLQLETAAGAAIR	Q9M9P3	2	1	CID		21.9382	3.19639	1	1	3.0528e+06	2	656.424	1311.84	-700.205	46.2487	15382	15382	MS2	21/36	R_Col_0_1.raw
	SAVDGLTEMSESEK	Q9M9P3	1	1	CID		27.4063	3.14034	1	1	1.75058e+06	2	742.509	1484.01	907.628	37.009	11725	11725	MS2	19/39	R_Col_0_1.raw
	SGFISLVSR	Q9M9P3	1	1	CID		1	3.08081	1	1	1.78176e+06	2	484.004	967	1508.11	46.6746	15550	15550	MS2	17/24	R_Col_0_1.raw
Q9LK36	34.02	14	485	53.1249	5.74463	180.759	Adenosylhomocysteinase 2 OS=Arabidopsis thaliana GN=SAHH2 PE=2 SV=1 - [SAHH2_ARATH]
	Sequence	Protein Accessions	# Proteins	# Protein Groups	Activation Type	Modifications	Probability	XCorr	Δ Score	Rank	Intensity	Charge	m/z [Da]	MH+ [Da]	ΔM [ppm]	RT [min]	First Scan	Last Scan	MS Order	Ions Matched	Spectrum File	Annotation
	NGTFPDPTSTDNPEFQIVLSIIK	Q9LK36	1	1	CID		58.9855	5.19397	1	1	890826	3	845.511	2534.52	487.244	98.6045	35864	35864	MS2	37/132	R_Col_0_1.raw
	WcScNIFSTQDHAAAAIAR	O23255;Q9LK36	2	2	CID	C2(Carbamidomethyl) C4(Carbamidomethyl)	69.6785	4.9435	1	1	1.04634e+06	2	1089.85	2178.69	-133.528	48.4544	16253	16253	MS2	26/54	R_Col_0_1.raw
	NNAIVcNIGHFDNEIDMLGLETYPGVKR	O23255;Q9LK36	2	2	CID	C6(Carbamidomethyl)	42.6109	4.68183	1	1	764137	3	1063.51	3188.53	-318.635	76.2662	27146	27146	MS2	29/162	R_Col_0_1.raw
	NNAIVcNIGHFDNEIDMLGLETYPGVK	O23255;Q9LK36	2	2	CID	C6(Carbamidomethyl)	10.6364	3.97118	1	1	4952472	3	1012.26	3034.78	438.968	83.2087	29852	29852	MS2	36/156	R_Col_0_1.raw
	WVFPDTNSGIIVLAEGR	Q9LK36	1	1	CID		97.1526	3.82014	1	1	2.66387e+06	2	937.512	1874.02	19.537	83.58	29998	29998	MS2	25/48	R_Col_0_1.raw
	ALDWGPGGGPDLIVDDGGDATLLIHEGVK	O23255;Q9LK36	2	2	CID		44.068	3.70893	1	1	1.04483e+06	3	963.179	2887.52	26.5022	83.1406	29827	29827	MS2	36/168	R_Col_0_1.raw
	VAVIcGYGDVGK	O23255;Q9LK36	2	2	CID	C5(Carbamidomethyl)	51.3876	3.69173	1	1	24940842	2	619.34	1237.67	38.0938	34.364	10676	10676	MS2	20/33	R_Col_0_1.raw
	NNAIVcNIGHFDNEIDMLGLETYPGVK	O23255;Q9LK36	2	2	CID	C6(Carbamidomethyl)	68.4269	3.68498	1	1	775083	2	1517.61	3034.21	251.099	82.7289	29666	29666	MS2	22/78	R_Col_0_1.raw
	LVGVSEETTTGVKR	O23255;Q9LK36	2	2	CID		82.1791	3.62233	1	1	1.57281e+06	2	738.342	1475.68	-88.1799	20.2643	5079	5079	MS2	23/39	R_Col_0_1.raw
	NGTFPDPTSTDNPEFQIVLSIIK	Q9LK36	1	1	CID		101.625	3.26302	1	1	867340	2	1267.69	2534.36	426.663	98.6234	35872	35872	MS2	19/66	R_Col_0_1.raw
	LVGVSEETTTGVK	O23255;Q9LK36	2	2	CID		22.5101	3.19552	1	1	14331344	2	660.424	1319.84	102.018	25.9626	7346	7346	MS2	20/36	R_Col_0_1.raw
	LYQMQETGALLFPAINVNDSVTK	Q9LK36	1	1	CID		17.1291	3.17189	1	1	1516933	2	1277.1	2553.2	348.808	83.4424	29944	29944	MS2	19/66	R_Col_0_1.raw
	WVFPDTNSGIIVLAEGR	Q9LK36	1	1	CID		61.0127	3.12682	1	1	2693914	2	938.012	1875.02	552.865	83.5776	29997	29997	MS2	21/48	R_Col_0_1.raw
	LVGVSEETTTGVK	O23255;Q9LK36	2	2	CID		19.0007	2.78582	1	1	1.138e+06	1	1319.85	1319.85	111.912	25.4994	7164	7164	MS2	14/36	R_Col_0_1.raw
Q9LYG3	40.65	17	588	64.3722	6.41748	178.862	NADP-dependent malic enzyme 2 OS=Arabidopsis thaliana GN=NADP-ME2 PE=1 SV=1 - [MAOP2_ARATH]
	Sequence	Protein Accessions	# Proteins	# Protein Groups	Activation Type	Modifications	Probability	XCorr	Δ Score	Rank	Intensity	Charge	m/z [Da]	MH+ [Da]	ΔM [ppm]	RT [min]	First Scan	Last Scan	MS Order	Ions Matched	Spectrum File	Annotation
	DLIGAVNAIKPTVLIGTSGVGQTFTK	Q9LYG3	1	1	CID		44.762	5.7566	1	1	1.41088e+06	2	1301.27	2601.53	409.583	83.717	30051	30051	MS2	24/75	R_Col_0_1.raw
	VLVQFEDFANHNAFDLLSK	Q9LYG3	1	1	CID		89.1941	5.53824	1	1	1.2321e+06	2	1104.02	2207.02	-40.5145	80.8638	28938	28938	MS2	25/54	R_Col_0_1.raw
	LLIDNVEELLPVVYTPTVGEAcQK	Q9LYG3	2	1	CID	C22(Carbamidomethyl)	33.1676	5.29038	1	1	5172725	3	901.178	2701.52	408.572	95.6184	34694	34694	MS2	39/138	R_Col_0_1.raw
	DAHYLTGLLPPVILSQDVQER	Q9LYG3	1	1	CID		57.3016	4.89532	1	1	1.32392e+06	2	1183.1	2365.19	396.445	83.863	30108	30108	MS2	27/60	R_Col_0_1.raw
	LADHTFLFLGAGEAGTGIAELIALK	Q9LYG3	1	1	CID		48.2399	4.78461	1	1	1.43239e+06	3	843.844	2529.52	451.059	94.6974	34335	34335	MS2	37/144	R_Col_0_1.raw
	TYLPGQANNcYIFPGLGLGLIMSGAIR	Q9LYG3	1	1	CID	C10(Carbamidomethyl)	26.4606	4.62889	1	1	1.18121e+06	3	966.096	2896.27	-72.8001	101.267	36908	36908	MS2	29/156	R_Col_0_1.raw
	ILGLGDLGcQGMGIPVGK	Q9LYG3;Q9CA83	4	2	CID	C9(Carbamidomethyl)	31.4131	4.48976	1	1	5.62472e+06	2	893.095	1785.18	135.828	75.5446	26864	26864	MS2	23/51	R_Col_0_1.raw
	DAHYLTGLLPPVILSQDVQER	Q9LYG3	1	1	CID		63.6936	4.46564	1	1	5.17616e+06	3	789.176	2365.51	531.787	83.4402	29943	29943	MS2	39/120	R_Col_0_1.raw
	LSLYTALGGIRPSAcLPITIDVGTNNEK	Q9LYG3	2	1	CID	C15(Carbamidomethyl)	50.7434	4.04937	1	1	1.77449e+06	3	992.18	2974.53	320.755	83.6287	30017	30017	MS2	32/162	R_Col_0_1.raw
	LLIDNVEELLPVVYTPTVGEAcQK	Q9LYG3	2	1	CID	C22(Carbamidomethyl)	3.37332	3.99277	1	1	1.68888e+06	2	1351.27	2701.53	413.404	95.9016	34805	34805	MS2	18/69	R_Col_0_1.raw
	AIFGSGSPFDPVVYDGK	Q9LYG3	1	1	CID		93.3312	3.97105	1	1	537372	2	878.011	1755.02	-480.81	71.4164	25252	25252	MS2	24/48	R_Col_0_1.raw
	AIFGSGSPFDPVVYDGK	Q9LYG3	1	1	CID		79.2088	3.95936	1	1	709359	2	878.428	1755.85	-5.96831	70.5136	24900	24900	MS2	22/48	R_Col_0_1.raw
	TYDLGLASNLPR	Q9LYG3	1	1	CID		23.7795	3.50011	1	1	6.6441e+06	2	660.424	1319.84	109.527	53.1239	18093	18093	MS2	17/33	R_Col_0_1.raw
	KPQGLYISLNEK	Q9LYG3	1	1	CID		30.3515	3.48964	1	1	3.00585e+06	2	695.424	1389.84	48.6829	30.0469	8968	8968	MS2	19/33	R_Col_0_1.raw
	LLIDNVEELLPVVYTPTVGEAcQK	Q9LYG3	2	1	CID	C22(Carbamidomethyl)	34.2266	3.2362	1	1	1.34736e+06	2	1350.69	2700.37	-18.4661	96.1701	34910	34910	MS2	19/69	R_Col_0_1.raw
	YMALMDLQER	Q9LYG3	2	1	CID		37.4981	3.12005	1	1	8.31786e+06	2	635.756	1270.51	715.495	51.9375	17624	17624	MS2	18/27	R_Col_0_1.raw
	YMALMDLQER	Q9LYG3	2	1	CID		40.8657	3.11147	1	1	11461065	2	635.34	1269.67	59.6143	52.029	17660	17660	MS2	18/27	R_Col_0_1.raw
O49485	25.7	18	603	63.2856	6.58057	178.314	D-3-phosphoglycerate dehydrogenase 1, chloroplastic OS=Arabidopsis thaliana GN=PGDH1 PE=1 SV=1 - [SERA1_ARATH]
	Sequence	Protein Accessions	# Proteins	# Protein Groups	Activation Type	Modifications	Probability	XCorr	Δ Score	Rank	Intensity	Charge	m/z [Da]	MH+ [Da]	ΔM [ppm]	RT [min]	First Scan	Last Scan	MS Order	Ions Matched	Spectrum File	Annotation
	GIIEPISDVYVNLVNADFTAK	O49485	1	1	CID		109.291	5.10093	1	1	1151132	2	1139.68	2278.36	71.0584	92.0789	33312	33312	MS2	23/60	R_Col_0_1.raw
	VLLDGSPESPLETITVQLSNVESK	O49485	1	1	CID		56.8731	4.77356	1	1	986330	2	1278.69	2556.36	398.513	90.7875	32807	32807	MS2	23/69	R_Col_0_1.raw
	VLLDGSPESPLETITVQLSNVESK	O49485	1	1	CID		35.1684	4.61528	1	1	2.85448e+06	3	852.761	2556.27	360.819	90.3204	32624	32624	MS2	28/138	R_Col_0_1.raw
	LLEDVANVDcSYNMTPEELNIK	O49485	1	1	CID	C10(Carbamidomethyl)	99.4868	4.20381	1	1	1247404	2	1284.1	2567.2	-1.18322	72.3004	25598	25598	MS2	27/63	R_Col_0_1.raw
	LLEDVANVDcSYNMTPEELNIK	O49485	1	1	CID	C10(Carbamidomethyl)	89.4882	4.18909	1	1	612101	2	1284.6	2568.2	388.203	71.5736	25314	25314	MS2	27/63	R_Col_0_1.raw
	VLLDGSPESPLETITVQLSNVESK	O49485	1	1	CID		70.3514	4.06589	1	1	1.21213e+06	2	1277.77	2554.53	-318.894	89.3643	32254	32254	MS2	20/69	R_Col_0_1.raw
	LAVQLVAGGSGVK	O49485	1	1	CID		56.6746	3.98659	1	1	3787904	2	599.339	1197.67	-872.111	38.1835	12190	12190	MS2	23/36	R_Col_0_1.raw
	AHAIGVDLVSFDEALATADFISLHMPLTPTTSK	O49485	1	1	CID		10.3844	3.74945	1	1	1.01948e+06	3	1157.1	3469.29	147.892	99.1564	36080	36080	MS2	34/192	R_Col_0_1.raw
	ISLcDALIVR	O49485	2	1	CID	C4(Carbamidomethyl)	35.8736	3.72043	1	1	2102416	2	581.005	1161	1165.52	60.6978	21076	21076	MS2	19/27	R_Col_0_1.raw
	IGEIPAVEEFVFLKL	O49485	1	1	CID		30.0415	3.6844	1	1	953446	2	852.677	1704.35	226.189	98.238	35721	35721	MS2	21/42	R_Col_0_1.raw
	ISLcDALIVR	O49485	2	1	CID	C4(Carbamidomethyl)	27.0148	3.62437	1	1	2215673	2	580.255	1159.5	-126.65	60.7538	21099	21099	MS2	18/27	R_Col_0_1.raw
	ALDAGIVAQAALDVFTK	O49485	1	1	CID		1	3.5663	0.123702	1	9129.31	2	852.094	1703.18	142.812	131.397	46858	46858	MS2	17/48	R_Col_0_1.raw
	GIIEPISDVYVNLVNADFTAK	O49485	1	1	CID		85.4525	3.51949	1	1	738115	2	1138.93	2276.86	-587.71	92.4587	33460	33460	MS2	20/60	R_Col_0_1.raw
	ALDAGIVAQAALDVFTK	O49485	1	1	CID		1	3.42636		2	1.59434e+06	2	852.511	1704.01	631.793	92.352	33418	33418	MS2	20/48	R_Col_0_1.raw
	VLLDGSPESPLETITVQLSNVESK	O49485	1	1	CID		17.5767	3.36519	1	1	823804	2	1278.02	2555.03	-123.136	91.041	32907	32907	MS2	15/69	R_Col_0_1.raw
	ALDAGIVAQAALDVFTK	O49485	1	1	CID		16.5252	3.31707	1	1	1.08053e+06	2	852.011	1703.01	44.9587	93.744	33962	33962	MS2	19/48	R_Col_0_1.raw
	IGEIPAVEEFVFLKL	O49485	1	1	CID		18.0155	3.14434	1	1	1.07805e+06	2	852.511	1704.01	30.6128	99.8093	36336	36336	MS2	15/42	R_Col_0_1.raw
	LAVQLVAGGSGVK	O49485	1	1	CID		19.5895	3.11953	1	1	5.52423e+06	2	599.922	1198.84	101.921	38.1332	12170	12170	MS2	17/36	R_Col_0_1.raw
F4HQD4	19.25	10	831	91.6233	5.18604	178.243	Heat shock 70 kDa protein 15 OS=Arabidopsis thaliana GN=HSP70-15 PE=1 SV=1 - [HSP7P_ARATH]
	Sequence	Protein Accessions	# Proteins	# Protein Groups	Activation Type	Modifications	Probability	XCorr	Δ Score	Rank	Intensity	Charge	m/z [Da]	MH+ [Da]	ΔM [ppm]	RT [min]	First Scan	Last Scan	MS Order	Ions Matched	Spectrum File	Annotation
	ASAEAAPASGDSDVNMQDAK	F4HQD4	1	1	CID		102.484	5.38645	1	1	395121	2	968.263	1935.52	350.724	20.831	5303	5303	MS2	28/57	R_Col_0_1.raw
	GAATDAQNGGTENQQSTIVFPK	F4HQD4	1	1	CID		44.8313	4.6186	1	1	1.52389e+06	2	1117.52	2234.02	-19.7555	35.8812	11278	11278	MS2	25/63	R_Col_0_1.raw
	AFTPTQVMGMMLSNLK	F4HQD4;Q9S7C0-2	3	2	CID		62.1895	4.16493	1	1	2.98853e+06	2	885.095	1769.18	170.967	93.1303	33722	33722	MS2	23/45	R_Col_0_1.raw
	AFTPTQVMGMMLSNLK	F4HQD4;Q9S7C0-2	3	2	CID		33.5756	4.14177	1	1	1.2142e+06	3	590.339	1769	69.3849	93.1663	33737	33737	MS2	30/90	R_Col_0_1.raw
	DFDEVLFNHFAAK	F4HQD4;Q9S7C0-2	3	2	CID		76.2033	4.0737	1	1	1681616	2	776.843	1552.68	-42.0601	66.5548	23373	23373	MS2	20/36	R_Col_0_1.raw
	FIGTAGAASTMMNPK	F4HQD4;Q9S7C0-2	3	2	CID		38.2974	3.73943	1	1	5.79737e+06	2	748.425	1495.84	-588.49	39.4989	12713	12713	MS2	22/42	R_Col_0_1.raw
	NLNTAVVDccIGIPVYFTDLQR	F4HQD4;Q9S7C0-2	3	2	CID	C9(Carbamidomethyl) C10(Carbamidomethyl)	41.7556	3.57699	1	1	949189	2	1284.69	2568.36	41.0914	85.4887	30744	30744	MS2	22/63	R_Col_0_1.raw
	GSVIDQLGYcINSYR	F4HQD4;Q9S7C0-2	3	2	CID	C10(Carbamidomethyl)	65.4922	3.45405	1	1	107572	2	873.428	1745.85	581.891	66.4572	23337	23337	MS2	24/42	R_Col_0_1.raw
	EAFLANLQEVEDWLYEDGEDETK	F4HQD4;Q9S7C0-2	3	2	CID		26.3756	3.33839	1	1	1.15771e+06	2	1372.69	2744.37	416.016	100.309	36532	36532	MS2	18/66	R_Col_0_1.raw
	GcALQcAILSPTFK	F4HQD4;Q9S7C0-2	3	2	CID	C2(Carbamidomethyl) C6(Carbamidomethyl)	15.3284	3.17535	1	1	1.51041e+06	2	783.843	1566.68	572.285	58.229	20108	20108	MS2	16/39	R_Col_0_1.raw
Q9S7C0-2	17.49	9	789	87.2622	5.30029	175.585	Isoform 2 of Heat shock 70 kDa protein 14 OS=Arabidopsis thaliana GN=HSP70-14 - [HSP7O_ARATH]
	Sequence	Protein Accessions	# Proteins	# Protein Groups	Activation Type	Modifications	Probability	XCorr	Δ Score	Rank	Intensity	Charge	m/z [Da]	MH+ [Da]	ΔM [ppm]	RT [min]	First Scan	Last Scan	MS Order	Ions Matched	Spectrum File	Annotation
	AFTPTQVMGMMLSNLK	F4HQD4;Q9S7C0-2	3	2	CID		62.1895	4.16493	1	1	2.98853e+06	2	885.095	1769.18	170.967	93.1303	33722	33722	MS2	23/45	R_Col_0_1.raw
	AFTPTQVMGMMLSNLK	F4HQD4;Q9S7C0-2	3	2	CID		33.5756	4.14177	1	1	1.2142e+06	3	590.339	1769	69.3849	93.1663	33737	33737	MS2	30/90	R_Col_0_1.raw
	ASAEAAPASGDcDVNMQDAK	Q9S7C0-2	2	1	CID	C12(Carbamidomethyl)	102.568	4.13696	1	1	504477	2	1004.93	2008.85	505.243	22.3807	5920	5920	MS2	30/57	R_Col_0_1.raw
	DFDEVLFNHFAAK	F4HQD4;Q9S7C0-2	3	2	CID		76.2033	4.0737	1	1	1681616	2	776.843	1552.68	-42.0601	66.5548	23373	23373	MS2	20/36	R_Col_0_1.raw
	FIGTAGAASTMMNPK	F4HQD4;Q9S7C0-2	3	2	CID		38.2974	3.73943	1	1	5.79737e+06	2	748.425	1495.84	-588.49	39.4989	12713	12713	MS2	22/42	R_Col_0_1.raw
	NLNTAVVDccIGIPVYFTDLQR	F4HQD4;Q9S7C0-2	3	2	CID	C9(Carbamidomethyl) C10(Carbamidomethyl)	41.7556	3.57699	1	1	949189	2	1284.69	2568.36	41.0914	85.4887	30744	30744	MS2	22/63	R_Col_0_1.raw
	GSVIDQLGYcINSYR	F4HQD4;Q9S7C0-2	3	2	CID	C10(Carbamidomethyl)	65.4922	3.45405	1	1	107572	2	873.428	1745.85	581.891	66.4572	23337	23337	MS2	24/42	R_Col_0_1.raw
	EAFLANLQEVEDWLYEDGEDETK	F4HQD4;Q9S7C0-2	3	2	CID		26.3756	3.33839	1	1	1.15771e+06	2	1372.69	2744.37	416.016	100.309	36532	36532	MS2	18/66	R_Col_0_1.raw
	GcALQcAILSPTFK	F4HQD4;Q9S7C0-2	3	2	CID	C2(Carbamidomethyl) C6(Carbamidomethyl)	15.3284	3.17535	1	1	1.51041e+06	2	783.843	1566.68	572.285	58.229	20108	20108	MS2	16/39	R_Col_0_1.raw
Q9LV03	0.86	1	2208	241.745	6.3667	169.705	Glutamate synthase 1 [NADH], chloroplastic OS=Arabidopsis thaliana GN=GLT1 PE=1 SV=2 - [GLUT1_ARATH]
	Sequence	Protein Accessions	# Proteins	# Protein Groups	Activation Type	Modifications	Probability	XCorr	Δ Score	Rank	Intensity	Charge	m/z [Da]	MH+ [Da]	ΔM [ppm]	RT [min]	First Scan	Last Scan	MS Order	Ions Matched	Spectrum File	Annotation
	HGcTNIVNLELLPQPPSTR	Q9LV03	1	1	CID	C3(Carbamidomethyl)	1	3.3124	1	1	707853	2	1073.6	2146.19	38.1512	58.2886	20132	20132	MS2	19/54	R_Col_0_1.raw
P53492	40.05	19	377	41.709	5.49072	169.153	Actin-7 OS=Arabidopsis thaliana GN=ACT7 PE=1 SV=1 - [ACT7_ARATH]
	Sequence	Protein Accessions	# Proteins	# Protein Groups	Activation Type	Modifications	Probability	XCorr	Δ Score	Rank	Intensity	Charge	m/z [Da]	MH+ [Da]	ΔM [ppm]	RT [min]	First Scan	Last Scan	MS Order	Ions Matched	Spectrum File	Annotation
	TTGIVLDSGDGVSHTVPIYEGYALPHAILR	P53492;Q8RYC2	6	2	CID		64.5719	6.07353		2	1.13566e+06	3	1051.43	3152.28	201.977	76.848	27373	27373	MS2	42/174	R_Col_0_1.raw
	TTGIVLDSGDGVSHTVPIYEGYALPHAILR	P53492;Q8RYC2	6	2	CID		42.2348	6.03667	0.0277504	1	1.95364e+06	3	1051.6	3152.78	360.538	71.4649	25271	25271	MS2	41/174	R_Col_0_1.raw
	YPIEHGIVSNWDDMEK	P53492	2	1	CID		105.059	5.17673	1	1	1.94604e+06	2	967.013	1933.02	71.8068	50.4069	17022	17022	MS2	26/45	R_Col_0_1.raw
	TTGIVLDSGDGVSHTVPIYEGYALPHAILR	P53492;Q8RYC2	6	2	CID		96.8946	5.13456		2	0	3	1050.84	3150.51	-359.621	77.3746	27580	27580	MS2	36/174	R_Col_0_1.raw
	YPIEHGIVSNWDDMEK	P53492	2	1	CID		49.1165	4.64046	1	1	1.47999e+06	2	967.596	1934.19	674.958	50.2202	16948	16948	MS2	24/45	R_Col_0_1.raw
	DLYGNIVLSGGSTMFPGIADR	P53492	1	1	CID		42.8608	4.30263	0.225694	1	1.12232e+06	2	1092.43	2183.86	355.549	88.2913	31835	31835	MS2	19/60	R_Col_0_1.raw
	SEYDESGPSIVHR	P53492	1	1	CID		54.1747	4.08112	1	1	1.70423e+06	2	738.425	1475.84	113.057	21.6753	5637	5637	MS2	21/36	R_Col_0_1.raw
	IWHHTFYNELR	P53492;Q96292;Q8RYC2	8	3	CID		17.3332	4.00235	1	1	9505196	3	506.254	1516.75	658.134	27.7711	8066	8066	MS2	28/60	R_Col_0_1.raw
	NYELPDGQVITIGAER	P53492;Q96292	3	2	CID		13.2818	3.96591	1	1	523388	2	888.428	1775.85	535.934	63.8948	22332	22332	MS2	17/45	R_Col_0_1.raw
	LAYVALDYEQELETAK	P53492	1	1	CID		93.7996	3.949	1	1	1.32579e+06	2	929.012	1857.02	584.057	67.8158	23842	23842	MS2	23/45	R_Col_0_1.raw
	NYELPDGQVITIGAER	P53492;Q96292	3	2	CID		74.5084	3.90565	1	1	11503063	2	887.928	1774.85	-27.2034	62.3866	21740	21740	MS2	23/45	R_Col_0_1.raw
	YPIEHGIVSNWDDMEK	P53492	2	1	CID		37.5909	3.82098	1	1	4.9003e+06	3	645.007	1933.01	65.0511	50.9786	17246	17246	MS2	31/90	R_Col_0_1.raw
	LAYVALDYEQELETAK	P53492	1	1	CID		49.3404	3.7129	1	1	1306035	2	928.512	1856.02	45.5732	69.8346	24635	24635	MS2	20/45	R_Col_0_1.raw
	VAPEEHPVLLTEAPLNPK	P53492	4	1	CID		25.4755	3.64151	1	1	2.31097e+06	2	977.513	1954.02	-23.3211	45.6639	15150	15150	MS2	19/51	R_Col_0_1.raw
	VAPEEHPVLLTEAPLNPK	P53492	4	1	CID		54.6542	3.58872	1	1	2.21644e+06	2	978.013	1955.02	488.205	45.5165	15091	15091	MS2	20/51	R_Col_0_1.raw
	DLYGNIVLSGGSTMFPGIADR	P53492	1	1	CID		52.2431	3.49998	1	1	787557	2	1091.68	2182.36	-331.55	86.9115	31298	31298	MS2	20/60	R_Col_0_1.raw
	LAYVALDYEQELETAK	P53492	1	1	CID		12.879	3.47284	1	1	10226.6	2	929.012	1857.02	584.057	122.386	43942	43942	MS2	15/45	R_Col_0_1.raw
	DLYGNIVLSGGSTMFPGIADR	P53492	1	1	CID		26.4307	3.25872		2	1.15408e+06	2	1091.93	2182.86	-102.412	88.4341	31891	31891	MS2	16/60	R_Col_0_1.raw
	GYMFTTTAER	P53492;Q96292	3	2	CID		35.749	3.10098	1	1	11070901	2	588.839	1176.67	114.843	31.1338	9398	9398	MS2	20/27	R_Col_0_1.raw
Q8GUM2	8.21	7	682	73.0296	5.61768	167.754	Heat shock 70 kDa protein 9, mitochondrial OS=Arabidopsis thaliana GN=HSP70-9 PE=1 SV=1 - [HSP7I_ARATH]
	Sequence	Protein Accessions	# Proteins	# Protein Groups	Activation Type	Modifications	Probability	XCorr	Δ Score	Rank	Intensity	Charge	m/z [Da]	MH+ [Da]	ΔM [ppm]	RT [min]	First Scan	Last Scan	MS Order	Ions Matched	Spectrum File	Annotation
	GVNPDEAVAMGAAIQGGILR	Q8GUM2	1	1	CID		75.11	5.55787	1	2	1.51662e+06	2	970.013	1939.02	6.15774	73.9449	26239	26239	MS2	26/57	R_Col_0_1.raw
	IPAEIASEIETAVSDLR	Q8GUM2	1	1	CID		105.562	5.15283	1	1	2.05069e+06	2	907.428	1813.85	-57.7378	91.286	33002	33002	MS2	24/48	R_Col_0_1.raw
	IINEPTAAALSYGMNNK	Q8GUM2	1	1	CID		107.894	5.04352	1	1	1.66757e+06	2	903.595	1806.18	-400.182	49.2997	16585	16585	MS2	28/48	R_Col_0_1.raw
	GVNPDEAVAMGAAIQGGILR	Q8GUM2	1	1	CID		50.2322	4.81101	1	2	1.07583e+06	2	970.513	1940.02	521.623	75.7008	26926	26926	MS2	24/57	R_Col_0_1.raw
	IINEPTAAALSYGMNNK	Q8GUM2	1	1	CID		76.3207	4.38141	1	1	2.14623e+06	2	904.345	1807.68	429.957	48.6599	16333	16333	MS2	26/48	R_Col_0_1.raw
	IPAEIASEIETAVSDLR	Q8GUM2	1	1	CID		47.6285	4.09773	1	1	1318923	2	907.845	1814.68	401.515	90.5543	32716	32716	MS2	20/48	R_Col_0_1.raw
	EKIPAEIASEIETAVSDLR	Q8GUM2	1	1	CID		39.2962	3.24919	1	1	1.08949e+06	2	1036.1	2071.19	46.3565	88.5264	31927	31927	MS2	16/54	R_Col_0_1.raw
Q9SF85	46.8	17	344	37.8118	5.45264	163.919	Adenosine kinase 1 OS=Arabidopsis thaliana GN=ADK1 PE=1 SV=1 - [ADK1_ARATH]
	Sequence	Protein Accessions	# Proteins	# Protein Groups	Activation Type	Modifications	Probability	XCorr	Δ Score	Rank	Intensity	Charge	m/z [Da]	MH+ [Da]	ΔM [ppm]	RT [min]	First Scan	Last Scan	MS Order	Ions Matched	Spectrum File	Annotation
	FNVEYIAGGATQNSIK	Q9LZG0;Q9SF85	3	2	CID		77.9592	4.99459	1	1	7463718	2	857.011	1713.01	670.881	51.2965	17372	17372	MS2	27/45	R_Col_0_1.raw
	TTVITQGADPVVVAEDGKVK	Q9LZG0;Q9SF85	3	2	CID		60.0841	4.79123	1	1	1.38554e+06	2	1014.43	2027.85	370.673	39.6522	12774	12774	MS2	20/57	R_Col_0_1.raw
	TTVITQGADPVVVAEDGK	Q9LZG0;Q9SF85	3	2	CID		41.9388	4.59204	1	1	2.89279e+06	2	900.428	1799.85	-49.6422	44.8943	14848	14848	MS2	21/51	R_Col_0_1.raw
	VFTMNLSAPFIcEFFK	Q9LZG0;Q9SF85	3	2	CID	C12(Carbamidomethyl)	74.694	4.54338	1	1	4.45572e+06	2	976.513	1952.02	547.924	98.2355	35720	35720	MS2	21/45	R_Col_0_1.raw
	TTVITQGADPVVVAEDGK	Q9LZG0;Q9SF85	3	2	CID		43.4008	4.44572	1	1	3.58124e+06	2	900.512	1800.02	42.956	42.7451	13998	13998	MS2	21/51	R_Col_0_1.raw
	VAQWMLQVPGATSYMGSIGK	Q9SF85	2	1	CID		30.9574	4.19616	1	1	1.13824e+06	3	709.008	2125.01	445.846	77.7321	27718	27718	MS2	30/114	R_Col_0_1.raw
	LVDTNGAGDAFVGGFLSQLVHGK	Q9SF85	2	1	CID		44.1078	4.17801	1	1	996414	2	1151.02	2301.03	-502.862	85.7708	30855	30855	MS2	17/66	R_Col_0_1.raw
	cLPYMDYIFGNETEAR	Q9SF85	2	1	CID	C1(Carbamidomethyl)	80.7822	3.9221	1	1	1194039	2	989.93	1978.85	-7.42362	78.9232	28182	28182	MS2	23/45	R_Col_0_1.raw
	VAQWMLQVPGATSYMGSIGK	Q9SF85	2	1	CID		26.098	3.74705	1	1	1126833	2	1063.18	2125.36	608.758	78.9603	28196	28196	MS2	18/57	R_Col_0_1.raw
	VFTMNLSAPFIcEFFK	Q9LZG0;Q9SF85	3	2	CID	C12(Carbamidomethyl)	29.2939	3.63118	1	1	1.47059e+06	3	651.09	1951.26	157.07	98.1013	35667	35667	MS2	27/90	R_Col_0_1.raw
	SLIANLSAANcYK	Q9LZG0;Q9SF85	3	2	CID	C11(Carbamidomethyl)	32.0307	3.62382	1	1	6.53324e+06	2	712.925	1424.84	85.4512	47.4246	15844	15844	MS2	21/36	R_Col_0_1.raw
	VHGWETDDVEQIAIK	Q9SF85	2	1	CID		33.8789	3.56615	1	1	10273838	2	870.428	1739.85	-6.81032	46.8719	15626	15626	MS2	18/42	R_Col_0_1.raw
	AGcYASNVVIQR	Q9LZG0;Q9SF85	3	2	CID	C3(Carbamidomethyl)	49.0504	3.53039	1	1	29303722	2	669.34	1337.67	7.91061	26.3688	7508	7508	MS2	19/33	R_Col_0_1.raw
	CLPYmDYIFGNETEAR	Q9SF85	2	1	CID	M5(Oxidation)	19.9739	3.5219	1	1	1.35974e+06	2	969.93	1938.85	521.486	87.3673	31475	31475	MS2	20/45	R_Col_0_1.raw
	VFTMNLSAPFIcEFFK	Q9LZG0;Q9SF85	3	2	CID	C12(Carbamidomethyl)	53.4406	3.34111	1	1	1.43092e+06	2	975.93	1950.85	-49.7894	99.0179	36026	36026	MS2	16/45	R_Col_0_1.raw
	LNNAILAEDK	Q9LZG0;Q9SF85	2	2	CID		8.90362	3.13037	1	1	4.38205e+06	2	550.838	1100.67	67.6151	24.6544	6825	6825	MS2	17/27	R_Col_0_1.raw
	cLPYMDYIFGNETEAR	Q9SF85	2	1	CID	C1(Carbamidomethyl)	13.1207	3.12332	1	1	967516	2	990.097	1979.19	161	80.7023	28876	28876	MS2	18/45	R_Col_0_1.raw
O23254	44.59	17	471	51.6852	7.2251	162.599	Serine hydroxymethyltransferase 4 OS=Arabidopsis thaliana GN=SHM4 PE=1 SV=1 - [GLYC4_ARATH]
	Sequence	Protein Accessions	# Proteins	# Protein Groups	Activation Type	Modifications	Probability	XCorr	Δ Score	Rank	Intensity	Charge	m/z [Da]	MH+ [Da]	ΔM [ppm]	RT [min]	First Scan	Last Scan	MS Order	Ions Matched	Spectrum File	Annotation
	VGALLLcDMAHISGLVAAQEAANPFEYcDVVTTTTHK	O23254	1	1	CID	C7(Carbamidomethyl) C28(Carbamidomethyl)	47.0044	5.00524	1	1	648279	3	1334.94	4002.8	-36.1001	91.3143	33014	33014	MS2	29/216	R_Col_0_1.raw
	YYGGNEFIDEIENLcR	O23254	1	1	CID	C15(Carbamidomethyl)	100.736	4.88868	1	1	3.15023e+06	2	996.847	1992.69	404.434	82.4698	29564	29564	MS2	29/45	R_Col_0_1.raw
	VNFTTGYIDYDKLEEK	O23254	1	1	CID		75.2689	4.62454	1	1	3.78225e+06	2	968.513	1936.02	558.012	53.3585	18186	18186	MS2	18/45	R_Col_0_1.raw
	GLVEKDFEQIGEFLSR	O23254	1	1	CID		53.8192	4.40837	1	1	1.20977e+06	3	623.09	1867.25	157.714	77.7253	27715	27715	MS2	30/90	R_Col_0_1.raw
	ALEAFHcDPAAWGVNVQPYSGSPANFAAYTALLQPHDR	O23254	1	1	CID	C7(Carbamidomethyl)	124.475	4.04846	1	1	375915	3	1381.44	4142.3	81.2763	84.7171	30442	30442	MS2	35/222	R_Col_0_1.raw
	VNFTTGYIDYDKLEEK	O23254	1	1	CID		91.2862	4.0482	1	1	4323381	2	967.93	1934.85	-44.6377	53.3946	18200	18200	MS2	19/45	R_Col_0_1.raw
	ISATSIYFESLPYK	O23254	1	1	CID		71.7058	3.92791	1	1	1.19369e+06	2	810.427	1619.85	623.183	66.269	23262	23262	MS2	22/39	R_Col_0_1.raw
	NAVFGDSSALAPGGVR	O23254	1	1	CID		16.1033	3.91952	1	1	7429165	2	759.426	1517.84	48.1322	45.1399	14942	14942	MS2	23/45	R_Col_0_1.raw
	DFEQIGEFLSR	O23254	1	1	CID		42.5114	3.79358	1	1	3.21746e+06	2	670.924	1340.84	143.368	75.0892	26684	26684	MS2	21/30	R_Col_0_1.raw
	LLIcGGSAYPR	O23254	1	1	CID	C4(Carbamidomethyl)	44.9824	3.6959	1	1	11177659	2	604.339	1207.67	862.12	35.4147	11090	11090	MS2	24/30	R_Col_0_1.raw
	ANAVALGNYLMSK	O23254	1	1	CID		44.4617	3.62723	1	1	4.34159e+06	2	676.841	1352.67	717.14	53.6271	18290	18290	MS2	20/36	R_Col_0_1.raw
	FSASYEMPGFLMSEMK	O23254	1	1	CID		26.4731	3.50193	1	1	1.60271e+06	2	927.929	1854.85	21.1097	79.5152	28412	28412	MS2	20/45	R_Col_0_1.raw
	GLVNNKDLDQLK	O23254	1	1	CID		23.2792	3.30945	1	1	4181521	2	678.924	1356.84	68.1681	28.8197	8483	8483	MS2	18/33	R_Col_0_1.raw
	GLVEKDFEQIGEFLSR	O23254	1	1	CID		46.1308	3.27585	1	1	1.4368e+06	2	934.346	1867.68	387.767	79.1464	28268	28268	MS2	14/45	R_Col_0_1.raw
	GLVNNKDLDQLKADVEK	O23254	1	1	CID		12.279	3.2746	1	1	1631717	2	950.763	1900.52	789.056	42.7537	14002	14002	MS2	18/48	R_Col_0_1.raw
	LLIcGGSAYPR	O23254	1	1	CID	C4(Carbamidomethyl)	41.0924	3.21771	1	1	10501012	2	603.923	1206.84	172.192	35.7301	11216	11216	MS2	22/30	R_Col_0_1.raw
	ANAVALGNYLMSK	O23254	1	1	CID		32.0608	2.67826	1	1	922730	1	1351.85	1351.85	110.786	52.7884	17962	17962	MS2	18/36	R_Col_0_1.raw
Q9FLT0	6.4	5	985	107.675	6.55127	162.322	Ribonuclease TUDOR 2 OS=Arabidopsis thaliana GN=TSN2 PE=1 SV=1 - [TSN2_ARATH]
	Sequence	Protein Accessions	# Proteins	# Protein Groups	Activation Type	Modifications	Probability	XCorr	Δ Score	Rank	Intensity	Charge	m/z [Da]	MH+ [Da]	ΔM [ppm]	RT [min]	First Scan	Last Scan	MS Order	Ions Matched	Spectrum File	Annotation
	GDTAVAAAATPGANIAELIISR	Q9FLT0	1	1	CID		1	3.68286	1	1	1.23072e+06	2	1042.1	2083.19	513.163	80.2262	28690	28690	MS2	21/63	R_Col_0_1.raw
	GDTAVAAAATPGANIAELIISR	Q9FLT0	1	1	CID		1	3.29034	1	1	1.0124e+06	2	1041.6	2082.19	33.1362	81.0199	29000	29000	MS2	17/63	R_Col_0_1.raw
	VASIQNQLAALSLK	Q9FLT0	1	1	CID		1	3.25533	1	1	1.87533e+06	2	728.425	1455.84	-7.13811	61.1624	21259	21259	MS2	14/39	R_Col_0_1.raw
	VMDFGSVFLPSPTK	Q9FLT0	1	1	CID		13.6625	3.22056	1	1	2.14954e+06	2	763.509	1526.01	808.574	73.3899	26021	26021	MS2	17/39	R_Col_0_1.raw
	DLGLELVENGLAK	Q8VZG7;Q9FLT0	3	2	CID		12.5321	3.08588	1	1	559474	2	685.174	1369.34	-1030.93	73.2616	25972	25972	MS2	17/36	R_Col_0_1.raw
P22954	20.21	17	653	71.3422	5.12256	161.495	Probable mediator of RNA polymerase II transcription subunit 37c OS=Arabidopsis thaliana GN=MED37D PE=1 SV=2 - [MD37D_ARATH]
	Sequence	Protein Accessions	# Proteins	# Protein Groups	Activation Type	Modifications	Probability	XCorr	Δ Score	Rank	Intensity	Charge	m/z [Da]	MH+ [Da]	ΔM [ppm]	RT [min]	First Scan	Last Scan	MS Order	Ions Matched	Spectrum File	Annotation
	SINPDEAVAYGAAVQAAILSGEGNEK	O65719;P22954;Q9LHA8	4	3	CID		108.346	5.81183	1	1	1.24309e+06	2	1288.1	2575.2	360.858	85.2475	30649	30649	MS2	26/75	R_Col_0_1.raw
	IINEPTAAAIAYGLDK	O65719;Q39043;P22953;P22954;Q9LKR3;Q9LHA8;Q9S9N1	8	7	CID		59.1437	5.12424	1	1	7779391	2	831.01	1661.01	673.067	59.1819	20481	20481	MS2	25/45	R_Col_0_1.raw
	NQVAMNPVNTVFDAK	P22953;P22954	3	2	CID		69.3239	4.75173	0.227762	1	14005793	2	824.927	1648.85	624.898	52.4855	17840	17840	MS2	24/42	R_Col_0_1.raw
	IINEPTAAAIAYGLDKK	O65719;Q39043;P22953;P22954;Q9LKR3;Q9LHA8;Q9S9N1	8	7	CID		57.9592	4.73409	1	1	6.53207e+06	2	894.595	1788.18	107.444	49.5621	16689	16689	MS2	22/48	R_Col_0_1.raw
	VQQLLQDFFNGK	P22953;P22954;Q9LHA8	4	3	CID		46.9486	4.64637	1	1	14428851	2	719.008	1437.01	177.891	68.1246	23966	23966	MS2	19/33	R_Col_0_1.raw
	ATAGDTHLGGEDFDNR	O65719;P22953;P22954;Q9LHA8;Q9S9N1	6	5	CID		78.7985	4.49341	1	1	1.97097e+06	2	838.844	1676.68	566.287	21.5813	5600	5600	MS2	27/45	R_Col_0_1.raw
	IINEPTAAAIAYGLDK	O65719;Q39043;P22953;P22954;Q9LKR3;Q9LHA8;Q9S9N1	8	7	CID		65.0135	4.30559	1	1	4935787	2	830.51	1660.01	71.0558	59.4088	20570	20570	MS2	24/45	R_Col_0_1.raw
	ATAGDTHLGGEDFDNR	O65719;P22953;P22954;Q9LHA8;Q9S9N1	6	5	CID		59.1043	4.21887	1	1	640070	2	838.844	1676.68	566.287	23.0009	6166	6166	MS2	21/45	R_Col_0_1.raw
	NQVAMNPVNTVFDAKR	P22953;P22954	3	2	CID		36.9024	3.9958	1	1	2.85374e+06	2	902.428	1803.85	-37.5647	42.4678	13888	13888	MS2	17/45	R_Col_0_1.raw
	NQVAMNPVNTVFDAK	P22953;P22954	3	2	CID		79.2161	3.98755	1	1	6497419	2	824.51	1648.01	119.545	53.354	18184	18184	MS2	21/42	R_Col_0_1.raw
	IINEPTAAAIAYGLDK	O65719;Q39043;P22953;P22954;Q9LKR3;Q9LHA8;Q9S9N1	8	7	CID		7.55343	3.87078	1	1	1.17761e+06	3	554.172	1660.5	364.29	59.0141	20416	20416	MS2	28/90	R_Col_0_1.raw
	IINEPTAAAIAYGLDKK	O65719;Q39043;P22953;P22954;Q9LKR3;Q9LHA8;Q9S9N1	8	7	CID		13.3122	3.53776	1	1	1.88153e+06	2	894.928	1788.85	480.09	50.9496	17235	17235	MS2	14/48	R_Col_0_1.raw
	MVNHFVQEFK	O65719;P22953;P22954;Q9LHA8	5	4	CID		26.8203	3.39327	1	1	6071779	2	639.84	1278.67	33.2569	29.6359	8805	8805	MS2	19/27	R_Col_0_1.raw
	TTPSYVAFTDSER	O65719;P22953;P22954;Q9LHA8	5	4	CID		54.7868	3.34281	1	1	20016212	2	737.425	1473.84	106.739	38.225	12206	12206	MS2	21/36	R_Col_0_1.raw
	NALENYAYNMR	O65719;P22953;P22954;Q9LHA8	4	4	CID		42.6439	3.33599	1	1	26168042	2	679.841	1358.67	42.8962	41.133	13358	13358	MS2	20/30	R_Col_0_1.raw
	VEIIANDQGNR	O65719;P22953;P22954;Q9LHA8	5	4	CID		40.7373	3.10217	1	1	311018	2	614.756	1228.5	-100.286	20.0814	5007	5007	MS2	20/30	R_Col_0_1.raw
	VQQLLQDFFNGK	P22953;P22954;Q9LHA8	4	3	CID		39.4684	2.62704	1	1	1.34992e+06	1	1436.94	1436.94	128.993	67.8757	23867	23867	MS2	16/33	R_Col_0_1.raw
Q9SYT0	37.85	13	317	36.1815	5.37646	159.788	Annexin D1 OS=Arabidopsis thaliana GN=ANN1 PE=1 SV=1 - [ANXD1_ARATH]
	Sequence	Protein Accessions	# Proteins	# Protein Groups	Activation Type	Modifications	Probability	XCorr	Δ Score	Rank	Intensity	Charge	m/z [Da]	MH+ [Da]	ΔM [ppm]	RT [min]	First Scan	Last Scan	MS Order	Ions Matched	Spectrum File	Annotation
	TAFEGWGTNEDLIISILAHR	Q9SYT0	1	1	CID		115.39	4.63158	1	1	971888	2	1122.77	2244.52	614.357	89.779	32415	32415	MS2	21/57	R_Col_0_1.raw
	WTSSNQVLMEVAcTR	Q9SYT0	1	1	CID	C13(Carbamidomethyl)	37.6353	4.17409	1	1	6363225	2	891.928	1782.85	570.973	56.7526	19527	19527	MS2	19/42	R_Col_0_1.raw
	TAFEGWGTNEDLIISILAHR	Q9SYT0	1	1	CID		55.7896	4.02365	1	1	675699	2	1121.85	2242.69	-202.627	89.892	32459	32459	MS2	20/57	R_Col_0_1.raw
	KSLEEDVAHHTTGDFR	Q9SYT0	1	1	CID		66.4127	4.00754	1	1	344980	2	921.845	1842.68	437.245	22.6502	6027	6027	MS2	22/45	R_Col_0_1.raw
	YEGDEVNMTLAK	Q9SYT0	1	1	CID		57.2619	3.83527	1	1	14838345	2	685.341	1369.67	31.9965	32.9989	10136	10136	MS2	21/33	R_Col_0_1.raw
	TLDKELSNDFER	Q9SYT0	1	1	CID		65.6176	3.72227	1	1	7094761	2	733.925	1466.84	89.0421	32.7714	10046	10046	MS2	17/33	R_Col_0_1.raw
	STIQcLTRPELYFVDVLR	Q9SYT0	1	1	CID	C5(Carbamidomethyl)	28.5433	3.40585	1	1	871274	2	1104.85	2208.69	-667.075	78.6111	28061	28061	MS2	20/51	R_Col_0_1.raw
	STIQcLTRPELYFVDVLR	Q9SYT0	1	1	CID	C5(Carbamidomethyl)	39.816	3.36549	1	1	2.5544e+06	2	1106.1	2211.19	464.314	78.4506	27998	27998	MS2	20/51	R_Col_0_1.raw
	SLEEDVAHHTTGDFRK	Q9SYT0	1	1	CID		39.582	3.36185	1	1	1.2292e+06	2	921.929	1842.85	527.646	24.1403	6622	6622	MS2	19/45	R_Col_0_1.raw
	LLVSLVTSYR	Q9SYT0	1	1	CID		49.7972	3.31672	1	1	6514877	2	575.922	1150.84	133.519	56.8876	19580	19580	MS2	19/27	R_Col_0_1.raw
	LLVSLVTSYR	Q9SYT0	1	1	CID		49.165	3.16368	1	1	1.49081e+06	2	576.422	1151.84	1001.6	58.3588	20158	20158	MS2	19/27	R_Col_0_1.raw
	SLEEGDDDDKFLALLR	Q9SYT0	1	1	CID		69.6996	3.15367	1	1	1.33227e+06	2	917.929	1834.85	-573.503	68.176	23986	23986	MS2	17/45	R_Col_0_1.raw
	YEGDEVNMTLAK	Q9SYT0	1	1	CID		87.0501	3.13092	1	1	0	2	684.767	1368.53	-805.856	33.0031	10138	10138	MS2	19/33	R_Col_0_1.raw
Q8L7B5	21.03	7	585	61.9395	6.68311	155.102	Chaperonin CPN60-like 1, mitochondrial OS=Arabidopsis thaliana GN=At2g33210 PE=1 SV=1 - [CH60B_ARATH]
	Sequence	Protein Accessions	# Proteins	# Protein Groups	Activation Type	Modifications	Probability	XCorr	Δ Score	Rank	Intensity	Charge	m/z [Da]	MH+ [Da]	ΔM [ppm]	RT [min]	First Scan	Last Scan	MS Order	Ions Matched	Spectrum File	Annotation
	QVANATNDVAGDGTTcATVLTR	Q8L7B5;P29197	2	2	CID	C16(Carbamidomethyl)	57.9803	4.4494	1	1	1.56045e+06	2	1118.02	2235.02	-19.1223	37.3411	11858	11858	MS2	23/63	R_Col_0_1.raw
	TALVDAASVSSLLTTTEAVVTEIPTK	Q8L7B5	1	1	CID		8.56209	4.28482	1	1	493928	3	873.261	2617.77	133.842	101.46	36984	36984	MS2	31/150	R_Col_0_1.raw
	LLEQDNPDLGYDAAK	Q8L7B5;P29197	2	2	CID		40.8919	3.74223	1	1	6095796	2	831.427	1661.85	26.9775	39.6758	12782	12782	MS2	20/42	R_Col_0_1.raw
	IGVQIIQNALK	Q8L7B5;P29197	2	2	CID		18.9978	3.72364	1	1	7055821	2	598.922	1196.84	84.7471	55.7002	19113	19113	MS2	17/30	R_Col_0_1.raw
	AAVEEGIVPGGGVALLYASK	Q8L7B5	1	1	CID		1	3.7088	1	1	1.56516e+06	3	634.84	1902.5	771.044	68.7731	24220	24220	MS2	30/114	R_Col_0_1.raw
	VTVSKDDTVVLDGAGDK	Q8L7B5	1	1	CID		4.02206	3.56117	1	1	810191	2	859.511	1718.01	-504.312	28.938	8531	8531	MS2	16/48	R_Col_0_1.raw
	SVAAGMNAMDLR	Q8L7B5;P29197	2	2	CID		27.8213	3.1613	1	1	4.78372e+06	2	618.339	1235.67	68.3944	36.5415	11540	11540	MS2	20/33	R_Col_0_1.raw
Q94A28	19.8	14	995	108.413	7.15186	154.845	Aconitate hydratase 2, mitochondrial OS=Arabidopsis thaliana GN=ACO2 PE=1 SV=3 - [ACO2M_ARATH]
	Sequence	Protein Accessions	# Proteins	# Protein Groups	Activation Type	Modifications	Probability	XCorr	Δ Score	Rank	Intensity	Charge	m/z [Da]	MH+ [Da]	ΔM [ppm]	RT [min]	First Scan	Last Scan	MS Order	Ions Matched	Spectrum File	Annotation
	WGSTAFQNMLVVPPGSGIVHQVNLEYLGR	Q94A28;Q9SIB9	2	2	CID		22.6123	5.18841	1	1	921714	3	1057.43	3170.28	206.324	87.3329	31462	31462	MS2	35/168	R_Col_0_1.raw
	DVWPSNEEVAQVVQYSVLPSMFK	Q94A28	1	1	CID		126.814	4.43671	1	1	786985	2	1326.85	2652.7	149.878	99.1709	36086	36086	MS2	22/66	R_Col_0_1.raw
	LKEGVTATDLVLTVTQILR	Q94A28	1	1	CID		13.9712	4.40822	1	1	730162	3	691.091	2071.26	502.669	92.3617	33422	33422	MS2	35/108	R_Col_0_1.raw
	TAEQDTIILAGAEYGSGSSR	Q94A28	1	1	CID		52.0892	4.2424	1	1	881498	2	1013.51	2026.02	23.6339	50.908	17219	17219	MS2	21/57	R_Col_0_1.raw
	WGSTAFQNMLVVPPGSGIVHQVNLEYLGR	Q94A28;Q9SIB9	2	2	CID		1	4.11332	1	1	515419	3	1057.01	3169.03	-188.045	85.9053	30907	30907	MS2	29/168	R_Col_0_1.raw
	SNLAGMGIIPLcFK	Q94A28	1	1	CID	C12(Carbamidomethyl)	56.7658	4.03115	1	1	1.72702e+06	2	761.592	1522.18	907.115	76.3953	27196	27196	MS2	21/39	R_Col_0_1.raw
	VSDIRPGQDVTVTTDSGK	Q94A28	1	1	CID		56.5783	3.95471	1	1	946457	2	938.012	1875.02	38.3474	23.3715	6315	6315	MS2	21/51	R_Col_0_1.raw
	VSDIRPGQDVTVTTDSGK	Q94A28	1	1	CID		17.1664	3.85736	1	1	3.95839e+06	3	625.673	1875	31.3825	23.2989	6284	6284	MS2	30/102	R_Col_0_1.raw
	SSYETITEGNPLWNELSAPSSTLYSWDPNSTYIHEPPYFK	Q94A28	1	1	CID		18.6018	3.72856	1	1	729777	3	1541.36	4622.06	199.382	93.6679	33932	33932	MS2	38/234	R_Col_0_1.raw
	SNLAGMGIIPLcFK	Q94A28	1	1	CID	C12(Carbamidomethyl)	53.0803	3.71993	1	1	1.82884e+06	2	761.092	1521.18	250.313	76.8006	27354	27354	MS2	19/39	R_Col_0_1.raw
	VILQDFTGVPVLVDLASMR	Q94A28	1	1	CID		12.466	3.3949	1	1	935285	2	1037.51	2074.02	424.23	98.1971	35705	35705	MS2	14/54	R_Col_0_1.raw
	AGEDAETLGLTGHER	Q94A28	1	1	CID		60.5557	3.24656	1	1	1.77754e+06	2	778.426	1555.84	70.5676	23.703	6447	6447	MS2	16/42	R_Col_0_1.raw
	LKEGVTATDLVLTVTQILR	Q94A28	1	1	CID		9.29014	3.24137	1	1	593331	2	1035.85	2070.69	227.399	91.645	33143	33143	MS2	15/54	R_Col_0_1.raw
	VILQDFTGVPVLVDLASmR	Q94A28	1	1	CID	M18(Dioxidation)	16.4637	3.13715	1	1	2.13721e+06	2	1053.51	2106.02	422.907	91.3342	33021	33021	MS2	18/54	R_Col_0_1.raw
P29511	37.33	12	450	49.5063	5.05908	153.089	Tubulin alpha-6 chain OS=Arabidopsis thaliana GN=TUBA6 PE=1 SV=1 - [TBA6_ARATH]
	Sequence	Protein Accessions	# Proteins	# Protein Groups	Activation Type	Modifications	Probability	XCorr	Δ Score	Rank	Intensity	Charge	m/z [Da]	MH+ [Da]	ΔM [ppm]	RT [min]	First Scan	Last Scan	MS Order	Ions Matched	Spectrum File	Annotation
	AFHEQLSVAEITNSAFEPASMMAK	P29511	2	1	CID		125.572	5.88803	1	1	602871	2	1305.44	2609.86	240.387	72.2643	25584	25584	MS2	31/69	R_Col_0_1.raw
	TVGGGDDAFNTFFSETGAGK	P29511	2	1	CID		81.8648	5.04545	1	1	1.70549e+06	2	989.93	1978.85	490.266	68.0426	23934	23934	MS2	19/57	R_Col_0_1.raw
	TVGGGDDAFNTFFSETGAGK	P29511	2	1	CID		76.4231	4.41225	1	1	2.1275e+06	2	989.43	1977.85	-15.095	68.0519	23938	23938	MS2	21/57	R_Col_0_1.raw
	FDGALNVDVTEFQTNLVPYPR	P29511	2	1	CID		54.157	4.36683	1	1	1094082	2	1198.02	2395.03	-69.0974	84.3232	30288	30288	MS2	23/60	R_Col_0_1.raw
	AVFVDLEPTVIDEVR	B9DHQ0;P29511	3	2	CID		64.4319	4.2775	1	1	6.53588e+06	2	851.511	1702.01	63.5635	75.0431	26666	26666	MS2	24/42	R_Col_0_1.raw
	IHFMLSSYAPVISAEK	P29511	2	1	CID		27.9889	3.78296	1	1	1.6792e+06	2	896.845	1792.68	-138.236	62.0731	21616	21616	MS2	18/45	R_Col_0_1.raw
	QLFHPEQLISGKEDAANNFAR	B9DHQ0;P29511	4	2	CID		4.5363	3.73234	1	1	2.50762e+06	3	795.926	2385.76	238.721	50.5745	17087	17087	MS2	24/120	R_Col_0_1.raw
	AVFVDLEPTVIDEVR	B9DHQ0;P29511	3	2	CID		11.7946	3.61283	1	1	1.29936e+06	3	568.422	1703.25	789.755	75.2054	26731	26731	MS2	26/84	R_Col_0_1.raw
	LVSQVISSLTASLR	P29511	2	1	CID		1	3.54708	1	1	7.58526e+06	2	737.925	1474.84	664.081	78.1747	27890	27890	MS2	21/39	R_Col_0_1.raw
	AFVHWYVGEGMEEGEFSEAR	B9DHQ0;P29511	4	2	CID		21.5257	3.50222	1	1	231429	2	1165.93	2330.86	360.889	62.7742	21894	21894	MS2	22/57	R_Col_0_1.raw
	AVcMISNSTSVAEVFSR	P29511	2	1	CID	C3(Carbamidomethyl)	42.4391	3.4467	1	1	440922	2	929.512	1858.02	71.9258	61.7355	21485	21485	MS2	19/48	R_Col_0_1.raw
	AVFVDLEPTVIDEVR	B9DHQ0;P29511	3	2	CID		3.47615	3.16444	1	1	1.46043e+06	2	851.927	1702.85	552.918	76.4309	27209	27209	MS2	15/42	R_Col_0_1.raw
Q8VZG7	12.01	6	991	108.168	7.29834	151.131	Ribonuclease TUDOR 1 OS=Arabidopsis thaliana GN=TSN1 PE=1 SV=1 - [TSN1_ARATH]
	Sequence	Protein Accessions	# Proteins	# Protein Groups	Activation Type	Modifications	Probability	XCorr	Δ Score	Rank	Intensity	Charge	m/z [Da]	MH+ [Da]	ΔM [ppm]	RT [min]	First Scan	Last Scan	MS Order	Ions Matched	Spectrum File	Annotation
	VPSLEDDFGPEAGEYLHTVTLGSGK	Q8VZG7	2	1	CID		48.5728	3.66713	1	1	2.04628e+06	3	873.511	2618.52	97.9763	75.5036	26848	26848	MS2	30/144	R_Col_0_1.raw
	NLPPSAIGDSAGFDAMGLLAANK	Q8VZG7	2	1	CID		20.0587	3.57625	1	1	884848	2	1115.6	2230.19	32.983	79.5872	28441	28441	MS2	17/66	R_Col_0_1.raw
	IASIQNQLASLSIK	Q8VZG7	2	1	CID		34.1648	3.45472	1	1	1.5327e+06	2	743.425	1485.84	-13.7105	61.1088	21238	21238	MS2	15/39	R_Col_0_1.raw
	RGGIDEPFAWESK	Q8VZG7	2	1	CID		7.08567	3.44172	1	1	2.70336e+06	2	746.425	1491.84	80.8224	40.5008	13110	13110	MS2	17/36	R_Col_0_1.raw
	ADSDEVTAPPAAAIAGSQPVGVNIAELVLVR	Q8VZG7	2	1	CID		68.4697	3.3574	1	1	721613	2	1516.19	3031.37	251.477	93.814	33990	33990	MS2	25/90	R_Col_0_1.raw
	DLGLELVENGLAK	Q8VZG7;Q9FLT0	3	2	CID		12.5321	3.08588	1	1	559474	2	685.174	1369.34	-1030.93	73.2616	25972	25972	MS2	17/36	R_Col_0_1.raw
Q9SH69	22.38	11	487	53.3441	5.45264	149.849	6-phosphogluconate dehydrogenase, decarboxylating 1, chloroplastic OS=Arabidopsis thaliana GN=At1g64190 PE=1 SV=1 - [6PGD1_ARATH]
	Sequence	Protein Accessions	# Proteins	# Protein Groups	Activation Type	Modifications	Probability	XCorr	Δ Score	Rank	Intensity	Charge	m/z [Da]	MH+ [Da]	ΔM [ppm]	RT [min]	First Scan	Last Scan	MS Order	Ions Matched	Spectrum File	Annotation
	IGLAGLAVMGQNLALNIAEK	Q9FWA3;Q9SH69	2	2	CID		109.631	5.76357	1	1	2.09482e+06	2	999.097	1997.19	530.923	92.9914	33668	33668	MS2	27/57	R_Col_0_1.raw
	IGLAGLAVMGQNLALNIAEK	Q9FWA3;Q9SH69	2	2	CID		30.5575	5.12354	1	1	72667.5	2	998.93	1996.85	364.079	105.365	38447	38447	MS2	21/57	R_Col_0_1.raw
	VAAQVEDGPcVTYIGEGGSGNFVK	Q9FFR3;Q9SH69	2	2	CID	C10(Carbamidomethyl)	94.3694	5.07582	1	1	954133	2	1228.02	2455.03	353.534	54.5178	18644	18644	MS2	24/69	R_Col_0_1.raw
	MVHNGIEYGDMQLISEAYDVLK	Q9FFR3;Q9SH69	2	2	CID		64.8873	4.63807	0.324109	1	774713	2	1263.1	2525.2	-3.38029	83.0579	29795	29795	MS2	28/63	R_Col_0_1.raw
	AAVEGNLPVSGQYSPR	Q9SH69	1	1	CID		80.7419	4.11292	1	1	5859890	2	823.01	1645.01	108.737	36.1351	11379	11379	MS2	22/45	R_Col_0_1.raw
	IGLAGLAVMGQNLALNIAEK	Q9FWA3;Q9SH69	2	2	CID		48.9959	3.77911	1	1	1.03944e+06	3	666.174	1996.51	190.639	93.6057	33907	33907	MS2	33/114	R_Col_0_1.raw
	AAVEGNLPVSGQYSPR	Q9SH69	1	1	CID		56.0484	3.73729	1	1	5164213	2	823.427	1645.85	615.017	36.0938	11363	11363	MS2	22/45	R_Col_0_1.raw
	IcSYAQGMNLLR	Q9FFR3;Q9SH69	2	2	CID	C2(Carbamidomethyl)	51.3502	3.49282	1	1	9462524	2	713.425	1425.84	101.185	49.3346	16598	16598	MS2	18/33	R_Col_0_1.raw
	IGLAGLAVMGQNLALNIAEK	Q9FWA3;Q9SH69	2	2	CID		1	3.33371	1	1	1.69465e+06	2	998.764	1996.52	197.179	94.3739	34208	34208	MS2	14/57	R_Col_0_1.raw
	IGLAGLAVMGQNLALNIAEK	Q9FWA3;Q9SH69	2	2	CID		33.2914	3.2814	1	1	17720.7	2	998.764	1996.52	197.179	125.499	44945	44945	MS2	19/57	R_Col_0_1.raw
	NPDLASLVVDPEFAK	Q9SH69	1	1	CID		46.9237	3.19518	1	1	1.90052e+06	2	808.51	1616.01	727.063	72.0499	25499	25499	MS2	17/42	R_Col_0_1.raw
Q9LZG0	41.74	14	345	37.8218	5.26221	149.427	Adenosine kinase 2 OS=Arabidopsis thaliana GN=ADK2 PE=1 SV=1 - [ADK2_ARATH]
	Sequence	Protein Accessions	# Proteins	# Protein Groups	Activation Type	Modifications	Probability	XCorr	Δ Score	Rank	Intensity	Charge	m/z [Da]	MH+ [Da]	ΔM [ppm]	RT [min]	First Scan	Last Scan	MS Order	Ions Matched	Spectrum File	Annotation
	FNVEYIAGGATQNSIK	Q9LZG0;Q9SF85	3	2	CID		77.9592	4.99459	1	1	7463718	2	857.011	1713.01	670.881	51.2965	17372	17372	MS2	27/45	R_Col_0_1.raw
	TTVITQGADPVVVAEDGKVK	Q9LZG0;Q9SF85	3	2	CID		60.0841	4.79123	1	1	1.38554e+06	2	1014.43	2027.85	370.673	39.6522	12774	12774	MS2	20/57	R_Col_0_1.raw
	FLPYMDFVFGNETEAR	Q9LZG0	1	1	CID		26.2912	4.66268	1	1	2.40818e+06	2	968.43	1935.85	-22.0771	88.0064	31724	31724	MS2	23/45	R_Col_0_1.raw
	TTVITQGADPVVVAEDGK	Q9LZG0;Q9SF85	3	2	CID		41.9388	4.59204	1	1	2.89279e+06	2	900.428	1799.85	-49.6422	44.8943	14848	14848	MS2	21/51	R_Col_0_1.raw
	VFTMNLSAPFIcEFFK	Q9LZG0;Q9SF85	3	2	CID	C12(Carbamidomethyl)	74.694	4.54338	1	1	4.45572e+06	2	976.513	1952.02	547.924	98.2355	35720	35720	MS2	21/45	R_Col_0_1.raw
	LVDTNGAGDAFVGGFMSQLVK	Q9LZG0	1	1	CID		74.8596	4.46481	1	1	2.10255e+06	2	1063.43	2125.86	-95.5865	85.2401	30646	30646	MS2	25/60	R_Col_0_1.raw
	TTVITQGADPVVVAEDGK	Q9LZG0;Q9SF85	3	2	CID		43.4008	4.44572	1	1	3.58124e+06	2	900.512	1800.02	42.956	42.7451	13998	13998	MS2	21/51	R_Col_0_1.raw
	FLPYMDFVFGNETEAR	Q9LZG0	1	1	CID		57.6194	4.19424	1	1	2.53629e+06	2	968.93	1936.85	494.246	87.503	31528	31528	MS2	22/45	R_Col_0_1.raw
	VFTMNLSAPFIcEFFK	Q9LZG0;Q9SF85	3	2	CID	C12(Carbamidomethyl)	29.2939	3.63118	1	1	1.47059e+06	3	651.09	1951.26	157.07	98.1013	35667	35667	MS2	27/90	R_Col_0_1.raw
	SLIANLSAANcYK	Q9LZG0;Q9SF85	3	2	CID	C11(Carbamidomethyl)	32.0307	3.62382	1	1	6.53324e+06	2	712.925	1424.84	85.4512	47.4246	15844	15844	MS2	21/36	R_Col_0_1.raw
	AGcYASNVVIQR	Q9LZG0;Q9SF85	3	2	CID	C3(Carbamidomethyl)	49.0504	3.53039	1	1	29303722	2	669.34	1337.67	7.91061	26.3688	7508	7508	MS2	19/33	R_Col_0_1.raw
	VAQWMLQIPGATSYMGSIGK	Q9LZG0	1	1	CID		34.3165	3.44739	1	1	2.13011e+06	2	1070.18	2139.36	597.586	83.3022	29889	29889	MS2	17/57	R_Col_0_1.raw
	VFTMNLSAPFIcEFFK	Q9LZG0;Q9SF85	3	2	CID	C12(Carbamidomethyl)	53.4406	3.34111	1	1	1.43092e+06	2	975.93	1950.85	-49.7894	99.0179	36026	36026	MS2	16/45	R_Col_0_1.raw
	LNNAILAEDK	Q9LZG0;Q9SF85	2	2	CID		8.90362	3.13037	1	1	4.38205e+06	2	550.838	1100.67	67.6151	24.6544	6825	6825	MS2	17/27	R_Col_0_1.raw
Q9SDM9	35.11	16	470	51.6376	5.52881	149.318	Nitrile-specifier protein 1 OS=Arabidopsis thaliana GN=NSP1 PE=1 SV=2 - [JAL28_ARATH]
	Sequence	Protein Accessions	# Proteins	# Protein Groups	Activation Type	Modifications	Probability	XCorr	Δ Score	Rank	Intensity	Charge	m/z [Da]	MH+ [Da]	ΔM [ppm]	RT [min]	First Scan	Last Scan	MS Order	Ions Matched	Spectrum File	Annotation
	VNDMTSEMITFLSIK	Q9SDM9	1	1	CID		51.6359	5.22555	1	1	2.25325e+06	2	864.928	1728.85	-3.96315	87.4062	31490	31490	MS2	23/42	R_Col_0_1.raw
	STDVLHSLGAYVSLSSTIK	Q9SDM9	1	1	CID		12.1457	4.53304	1	1	856410	2	990.097	1979.19	574.415	75.7126	26931	26931	MS2	20/54	R_Col_0_1.raw
	FEYVNGSQVVVGDEHGK	Q9SDM9	2	1	CID		37.7205	4.22253	1	1	1842627	2	932.429	1863.85	-19.7014	33.5648	10362	10362	MS2	19/48	R_Col_0_1.raw
	VYVGQAQYGIAFVK	Q9SDM9	2	1	CID		57.6237	4.22227	1	1	5.69189e+06	2	771.926	1542.84	8.27741	56.2907	19346	19346	MS2	22/39	R_Col_0_1.raw
	LNTLDSYNIVDKK	Q9SDM9	2	1	CID		45.1759	4.15709	1	1	7.07139e+06	2	761.926	1522.84	21.4887	34.7341	10823	10823	MS2	20/36	R_Col_0_1.raw
	FEYVNGSQVVVGDEHGKK	Q9SDM9	2	1	CID		62.5052	4.14595	1	1	1.1056e+06	2	996.43	1991.85	-64.8717	25.9406	7339	7339	MS2	26/51	R_Col_0_1.raw
	STDVLHSLGAYVSLSSTIK	Q9SDM9	1	1	CID		34.9071	3.7465	1	1	1.36147e+06	3	660.424	1979.26	609.9	75.2921	26765	26765	MS2	31/108	R_Col_0_1.raw
	APTNDRFDDLFFYGIDSA	Q9SDM9	2	1	CID		41.3092	3.70357	1	1	6176862	2	1033.01	2065.02	526.134	85.9257	30914	30914	MS2	16/51	R_Col_0_1.raw
	TWSISPATGDVPHLScLGVR	Q9SDM9	1	1	CID	C16(Carbamidomethyl)	80.2658	3.62794	1	1	1.16721e+06	2	1076.85	2152.69	-181.844	63.9371	22349	22349	MS2	16/57	R_Col_0_1.raw
	GGEMGDVWDDGVYENVR	Q9SDM9	1	1	CID		45.3696	3.57338	1	1	631898	2	948.679	1896.35	-765.192	58.202	20098	20098	MS2	18/48	R_Col_0_1.raw
	GGEMGDVWDDGVYENVR	Q9SDM9	1	1	CID		25.9716	3.55348	1	1	1.44335e+06	2	949.929	1898.85	552.427	57.8142	19945	19945	MS2	20/48	R_Col_0_1.raw
	LNTLDSYNIVDKK	Q9SDM9	2	1	CID		21.5784	3.50341	1	1	7.79797e+06	2	762.426	1523.84	677.722	34.7318	10822	10822	MS2	18/36	R_Col_0_1.raw
	GGEMGDVWDDGVYENVRK	Q9SDM9	1	1	CID		15.9915	3.42377	1	1	1.61667e+06	2	1013.51	2026.02	60.7756	46.8945	15636	15636	MS2	17/51	R_Col_0_1.raw
	WFHcSTPGDSLTAR	Q9SDM9	2	1	CID	C4(Carbamidomethyl)	32.2459	3.39595	1	1	7.15017e+06	2	817.927	1634.85	66.0773	32.5507	9959	9959	MS2	19/39	R_Col_0_1.raw
	QYNGFYSFDTTTNEWK	Q9SDM9	3	1	CID		73.1372	3.30175	1	1	1.58289e+06	2	1000.85	2000.69	-89.7895	62.9391	21957	21957	MS2	16/45	R_Col_0_1.raw
	KVYVGQAQYGIAFVK	Q9SDM9	2	1	CID		1	3.14354	1	1	1.7324e+06	2	836.427	1671.85	550.467	44.668	14758	14758	MS2	15/42	R_Col_0_1.raw
Q84VW9	10.33	7	968	110.091	6.03662	149.282	Phosphoenolpyruvate carboxylase 3 OS=Arabidopsis thaliana GN=PPC3 PE=1 SV=2 - [CAPP3_ARATH]
	Sequence	Protein Accessions	# Proteins	# Protein Groups	Activation Type	Modifications	Probability	XCorr	Δ Score	Rank	Intensity	Charge	m/z [Da]	MH+ [Da]	ΔM [ppm]	RT [min]	First Scan	Last Scan	MS Order	Ions Matched	Spectrum File	Annotation
	AFSHMLNLANLAEEVQIAHR	Q84VW9	1	1	CID		26.1649	4.16781	1	1	1.04294e+06	3	755.675	2265.01	375.864	69.7444	24600	24600	MS2	27/114	R_Col_0_1.raw
	VSEDDKLVEYDALLLDR	Q9MAH0;Q84VW9	2	2	CID		74.4937	3.87644	1	1	712827	2	996.93	1992.85	-80.0388	65.8846	23115	23115	MS2	23/48	R_Col_0_1.raw
	SLcScGDSPIADGSLLDFLR	Q84VW9	1	1	CID	C3(Carbamidomethyl) C5(Carbamidomethyl)	1	3.8588	0.155511	1	1.15408e+06	2	1091.93	2182.86	-70.6178	88.4341	31891	31891	MS2	18/57	R_Col_0_1.raw
	ALLDEMAVVATEEYR	Q9MAH0;Q84VW9	2	2	CID		28.572	3.55016	1	1	0	2	856.078	1711.15	764.203	78.6367	28070	28070	MS2	19/42	R_Col_0_1.raw
	SLcScGDSPIADGSLLDFLR	Q84VW9	1	1	CID	C3(Carbamidomethyl) C5(Carbamidomethyl)	1	3.33155		2	1.12232e+06	2	1092.43	2183.86	387.329	88.2913	31835	31835	MS2	16/57	R_Col_0_1.raw
	ETVQELYELSAEYEGK	Q84VW9	1	1	CID		33.5859	3.19083	1	1	1.11867e+06	2	944.929	1888.85	510.952	67.8273	23847	23847	MS2	17/45	R_Col_0_1.raw
	VTIDLIEMVFAK	Q9MAH0;Q84VW9	2	2	CID		28.7117	3.07115	1	1	993767	2	690.174	1379.34	417.604	92.8177	33600	33600	MS2	15/33	R_Col_0_1.raw
Q8VZJ2	37.5	14	344	37.6881	6.84424	147.321	Probable glucan endo-1,3-beta-glucosidase At4g16260 OS=Arabidopsis thaliana GN=At4g16260 PE=1 SV=1 - [BGNEM_ARATH]
	Sequence	Protein Accessions	# Proteins	# Protein Groups	Activation Type	Modifications	Probability	XCorr	Δ Score	Rank	Intensity	Charge	m/z [Da]	MH+ [Da]	ΔM [ppm]	RT [min]	First Scan	Last Scan	MS Order	Ions Matched	Spectrum File	Annotation
	YIAVGNEVSPSNGGDVVLPAMR	Q8VZJ2	1	1	CID		95.4901	5.35938	1	1	594825	2	1123.52	2246.02	399.069	62.1642	21652	21652	MS2	27/63	R_Col_0_1.raw
	GYQNLFDALLDVVYSAVER	Q8VZJ2	1	1	CID		102.043	5.07307	1	1	25685.7	2	1087.02	2173.02	426.1	115.113	41608	41608	MS2	26/54	R_Col_0_1.raw
	GVETYLFAMFDENQKSPEIEK	Q8VZJ2	1	1	CID		33.3653	4.76834	1	1	4880205	3	826.177	2476.52	541.505	80.3454	28736	28736	MS2	32/120	R_Col_0_1.raw
	SWLQNNVLNYYPAVSFK	Q8VZJ2	1	1	CID		99.7881	4.72164	1	1	4.35177e+06	2	1022.51	2044.02	482.96	81.736	29278	29278	MS2	23/48	R_Col_0_1.raw
	VSTAIDMTLIGNSFPPSSGEFR	Q8VZJ2	1	1	CID		78.0491	4.59959	1	1	1.31216e+06	2	1163.52	2326.03	-48.3076	78.965	28198	28198	MS2	22/63	R_Col_0_1.raw
	GVETYLFAMFDENQKSPEIEK	Q8VZJ2	1	1	CID		101.398	4.47752	1	1	881520	2	1238.6	2476.2	412.232	79.9504	28583	28583	MS2	22/60	R_Col_0_1.raw
	VSTAIDMTLIGNSFPPSSGEFR	Q8VZJ2	1	1	CID		49.9501	4.35745	1	1	1.43079e+06	2	1164.1	2327.19	453.046	80.3595	28742	28742	MS2	21/63	R_Col_0_1.raw
	SWLQNNVLNYYPAVSFK	Q8VZJ2	1	1	CID		43.0865	4.19866	1	1	5.181e+06	2	1022.01	2043.02	-6.28407	82.0998	29420	29420	MS2	21/48	R_Col_0_1.raw
	VSTAIDMTLIGNSFPPSSGEFR	Q8VZJ2	1	1	CID		45.0319	3.88998	1	1	1.09621e+06	2	1164.02	2327.03	381.454	78.7896	28130	28130	MS2	23/63	R_Col_0_1.raw
	VSTAIDMTLIGNSFPPSSGEFR	Q8VZJ2	1	1	CID		60.5668	3.88673	1	1	1.25775e+06	2	1163.68	2326.36	94.9875	80.3736	28748	28748	MS2	21/63	R_Col_0_1.raw
	GVETYLFAMFDENQK	Q8VZJ2	1	1	CID		11.5019	3.68545	1	1	527365	3	598.422	1793.25	795.689	88.0356	31736	31736	MS2	26/84	R_Col_0_1.raw
	NTGIEVIIGVPNTDLR	Q8VZJ2	1	1	CID		21.8999	3.59025	1	1	1.31085e+06	2	856.011	1711.01	44.2253	70.7262	24982	24982	MS2	17/45	R_Col_0_1.raw
	NFGLFFPNKQPK	Q8VZJ2	1	1	CID		33.8792	3.17799	1	1	12813278	2	719.425	1437.84	746.758	45.6464	15142	15142	MS2	17/33	R_Col_0_1.raw
	NTGIEVIIGVPNTDLR	Q8VZJ2	1	1	CID		9.6946	3.10111	1	1	3.01921e+06	2	856.594	1712.18	725.6	69.6882	24578	24578	MS2	14/45	R_Col_0_1.raw
O24456	33.64	10	327	35.7252	7.7085	147.226	Receptor for activated C kinase 1A OS=Arabidopsis thaliana GN=RACK1A PE=1 SV=2 - [GBLPA_ARATH]
	Sequence	Protein Accessions	# Proteins	# Protein Groups	Activation Type	Modifications	Probability	XCorr	Δ Score	Rank	Intensity	Charge	m/z [Da]	MH+ [Da]	ΔM [ppm]	RT [min]	First Scan	Last Scan	MS Order	Ions Matched	Spectrum File	Annotation
	AHTDMVTAIATPIDNADIIVSASR	O24456	2	1	CID		25.9269	4.58395	1	1	910700	2	1241.6	2482.2	-26.1573	71.8479	25421	25421	MS2	24/69	R_Col_0_1.raw
	STLAGHTGYVSTVAVSPDGSLcASGGK	O24456	1	1	CID	C22(Carbamidomethyl)	37.1259	4.53399	1	1	1.41289e+06	2	1290.6	2580.2	370.899	42.1645	13769	13769	MS2	23/78	R_Col_0_1.raw
	LYSLEANSVIHALcFSPNR	O24456	1	1	CID	C14(Carbamidomethyl)	28.5045	4.30906	1	1	4667632	3	731.425	2192.26	530.938	70.8444	25028	25028	MS2	36/108	R_Col_0_1.raw
	AHTDMVTAIATPIDNADIIVSASR	O24456	2	1	CID		8.54711	3.84748	1	1	919792	2	1242.18	2483.36	443.657	73.2778	25979	25979	MS2	20/69	R_Col_0_1.raw
	AHTDMVTAIATPIDNADIIVSASR	O24456	2	1	CID		1	3.78855	1	1	2.39445e+06	3	828.094	2482.27	2.1543	71.7704	25389	25389	MS2	33/138	R_Col_0_1.raw
	LWDLAAGVSTR	O24456	2	1	CID		41.0476	3.7397	1	1	4.42221e+06	2	595.422	1189.84	1008.77	53.7214	18327	18327	MS2	22/30	R_Col_0_1.raw
	LWDLAAGVSTR	O24456	2	1	CID		28.1829	3.72918	1	1	5.04081e+06	2	594.839	1188.67	28.2533	53.7235	18328	18328	MS2	19/30	R_Col_0_1.raw
	DVLSVAFSLDNR	O24456	2	1	CID		13.7808	3.28633	1	1	963047	2	668.507	1336.01	236.98	77.3138	27556	27556	MS2	15/33	R_Col_0_1.raw
	DVLSVAFSLDNR	O24456	2	1	CID		32.2359	3.20041	1	1	1.79691e+06	2	668.424	1335.84	112.242	75.3864	26802	26802	MS2	17/33	R_Col_0_1.raw
	FSPNTLQPTIVSASWDK	O24456	2	1	CID		5.69456	3.11326	1	1	789692	2	946.012	1891.02	30.688	63.2275	22071	22071	MS2	17/48	R_Col_0_1.raw
Q9SJL8	27.69	10	390	42.4706	6.17627	147.215	S-adenosylmethionine synthase 3 OS=Arabidopsis thaliana GN=METK3 PE=1 SV=1 - [METK3_ARATH]
	Sequence	Protein Accessions	# Proteins	# Protein Groups	Activation Type	Modifications	Probability	XCorr	Δ Score	Rank	Intensity	Charge	m/z [Da]	MH+ [Da]	ΔM [ppm]	RT [min]	First Scan	Last Scan	MS Order	Ions Matched	Spectrum File	Annotation
	LcDQISDAILDAcLEQDPESK	Q9SJL8;Q9LUT2	2	2	CID	C2(Carbamidomethyl) C13(Carbamidomethyl)	85.448	5.1066	1	1	1.14311e+06	2	1211.02	2421.03	385.07	72.0595	25503	25503	MS2	26/60	R_Col_0_1.raw
	LcDQISDAILDAcLEQDPESK	Q9SJL8;Q9LUT2	2	2	CID	C2(Carbamidomethyl) C13(Carbamidomethyl)	88.7344	4.97211	1	1	866480	2	1211.1	2421.19	453.881	70.6447	24950	24950	MS2	25/60	R_Col_0_1.raw
	TNMVMVFGEITTAAK	Q9SJL8	1	1	CID		60.4208	4.63114	1	1	3.5509e+06	2	807.01	1613.01	127.038	73.6601	26126	26126	MS2	21/42	R_Col_0_1.raw
	FVIGGPHGDAGLTGR	Q9SJL8;P17562;P23686;Q9LUT2	4	4	CID		72.2735	4.32882	1	1	12443481	2	727.425	1453.84	60.4394	32.089	9776	9776	MS2	27/42	R_Col_0_1.raw
	EAFDFRPGMMAINLDLKR	Q9SJL8	1	1	CID		45.5211	4.17941	1	1	2.0189e+06	3	708.758	2124.26	87.6321	68.8656	24256	24256	MS2	27/102	R_Col_0_1.raw
	YLDDNTIFHLNPSGR	Q9SJL8	1	1	CID		90.2085	4.09851	1	1	4428180	2	881.511	1762.02	90.6272	55.4048	18994	18994	MS2	20/42	R_Col_0_1.raw
	FVIGGPHGDAGLTGR	Q9SJL8;P17562;P23686;Q9LUT2	4	4	CID		1.68402	3.4887	1	1	4.13855e+06	2	727.425	1453.84	60.4394	33.4533	10318	10318	MS2	22/42	R_Col_0_1.raw
	LcDQISDAILDAcLEQDPESK	Q9SJL8;Q9LUT2	2	2	CID	C2(Carbamidomethyl) C13(Carbamidomethyl)	59.62	3.42976	1	1	718705	2	1210.6	2420.19	40.8708	72.4912	25672	25672	MS2	18/60	R_Col_0_1.raw
	TNMVMVFGEITTAAK	Q9SJL8	1	1	CID		53.1592	3.29688	1	1	18445.8	2	807.51	1614.01	746.546	122.651	44030	44030	MS2	15/42	R_Col_0_1.raw
	RcIVQVSYAIGVPEPLSVFVDTYK	Q9SJL8	1	1	CID	C2(Carbamidomethyl)	29.9345	3.18226	1	1	919247	2	1371.02	2741.03	217.508	88.1263	31771	31771	MS2	21/69	R_Col_0_1.raw
Q9LHB9	31.25	13	352	38.8224	6.66846	146.573	Peroxidase 32 OS=Arabidopsis thaliana GN=PER32 PE=1 SV=3 - [PER32_ARATH]
	Sequence	Protein Accessions	# Proteins	# Protein Groups	Activation Type	Modifications	Probability	XCorr	Δ Score	Rank	Intensity	Charge	m/z [Da]	MH+ [Da]	ΔM [ppm]	RT [min]	First Scan	Last Scan	MS Order	Ions Matched	Spectrum File	Annotation
	ASFQNVGLDRPSDLVALSGGHTFGK	Q9LHB9	1	1	CID		113.507	5.71395	1	1	14104936	3	858.761	2574.27	371.782	59.1795	20480	20480	MS2	42/144	R_Col_0_1.raw
	TVScADILTIAAQQAVNLAGGPSWR	Q9LHB9	1	1	CID	C4(Carbamidomethyl)	71.4579	5.31488	1	1	3.11861e+06	2	1300.6	2600.2	333.925	96.7677	35144	35144	MS2	28/72	R_Col_0_1.raw
	ASFQNVGLDRPSDLVALSGGHTFGK	Q9LHB9	1	1	CID		53.5639	5.27082	1	1	936570	2	1287.27	2573.53	85.5293	58.4178	20182	20182	MS2	29/72	R_Col_0_1.raw
	TVScADILTIAAQQAVNLAGGPSWR	Q9LHB9	1	1	CID	C4(Carbamidomethyl)	56.1108	5.10881	1	1	848033	2	1300.6	2600.2	333.925	98.1541	35688	35688	MS2	25/72	R_Col_0_1.raw
	MGNITPLTGTQGQIR	Q9LHB9	1	1	CID		71.6973	4.71533	1	1	49439796	2	793.926	1586.85	8.30692	39.3089	12638	12638	MS2	26/42	R_Col_0_1.raw
	FFNAFVEAMNR	Q9LHB9	1	1	CID		62.3176	4.3376	1	1	305923	2	673.924	1346.84	894.449	66.9006	23496	23496	MS2	21/30	R_Col_0_1.raw
	TVScADILTIAAQQAVNLAGGPSWR	Q9LHB9	1	1	CID	C4(Carbamidomethyl)	23.0774	4.19936	1	1	12189484	3	867.428	2600.27	360.942	97.4106	35396	35396	MS2	31/144	R_Col_0_1.raw
	ASFQNVGLDRPSDLVALSGGHTFGK	Q9LHB9	1	1	CID		37.7621	4.07223	1	1	1.28155e+06	3	858.011	2572.02	-502.709	60.0645	20829	20829	MS2	38/144	R_Col_0_1.raw
	mGNITPLTGTQGQIR	Q9LHB9	1	1	CID	M1(Oxidation)	42.8539	3.83773	1	1	1779030	2	801.51	1602.01	-508.594	39.1815	12587	12587	MS2	22/42	R_Col_0_1.raw
	DSLQAFFALANTNLPAPFFTLPQLK	Q9LHB9	1	1	CID		81.1922	3.6588	1	1	25109.9	2	1383.27	2765.53	384.604	109.466	39789	39789	MS2	24/72	R_Col_0_1.raw
	NQcQFIMDR	Q9LHB9;Q9LDN9	2	2	CID	C3(Carbamidomethyl)	24.2469	3.18796	1	1	18183658	2	606.839	1212.67	941.404	28.4536	8336	8336	MS2	16/24	R_Col_0_1.raw
	FFNAFVEAMNR	Q9LHB9	1	1	CID		6.23606	3.13244	1	1	23931.2	2	673.341	1345.67	28.2316	113.009	40931	40931	MS2	19/30	R_Col_0_1.raw
	NQcQFIMDR	Q9LHB9;Q9LDN9	2	2	CID	C3(Carbamidomethyl)	7.31492	2.93697	1	1	1.48823e+06	1	1211.6	1211.6	58.864	28.9793	8547	8547	MS2	15/24	R_Col_0_1.raw
Q9SN86	48.39	15	403	42.3793	8.51416	146	Malate dehydrogenase, chloroplastic OS=Arabidopsis thaliana GN=At3g47520 PE=1 SV=1 - [MDHP_ARATH]
	Sequence	Protein Accessions	# Proteins	# Protein Groups	Activation Type	Modifications	Probability	XCorr	Δ Score	Rank	Intensity	Charge	m/z [Da]	MH+ [Da]	ΔM [ppm]	RT [min]	First Scan	Last Scan	MS Order	Ions Matched	Spectrum File	Annotation
	TLVEAVAENcPNAFIHIISNPVNSTVPIAAEVLK	Q9SN86	1	1	CID	C10(Carbamidomethyl)	64.8145	5.34268	1	1	1.79593e+06	3	1211.27	3631.79	239.044	94.2396	34155	34155	MS2	40/198	R_Col_0_1.raw
	AGAGSATLSMAYAAAR	Q9SN86	1	1	CID		61.0517	4.96014	1	1	5012665	2	734.925	1468.84	82.7246	41.0487	13326	13326	MS2	25/45	R_Col_0_1.raw
	GVAADLSHcNTPSQVR	Q9SN86	1	1	CID	C9(Carbamidomethyl)	87.6974	4.72728	1	1	462772	2	856.511	1712.01	114.564	22.6414	6023	6023	MS2	24/45	R_Col_0_1.raw
	VAVLGAAGGIGQPLSLLIK	Q9SN86	1	1	CID		51.7259	4.42219	1	1	1.71823e+06	2	889.511	1778.02	517.901	86.1576	31004	31004	MS2	23/54	R_Col_0_1.raw
	VAVLGAAGGIGQPLSLLIK	Q9SN86	1	1	CID		16.2466	4.06745	1	1	1.03971e+06	3	593.172	1777.5	229.404	84.9755	30543	30543	MS2	38/108	R_Col_0_1.raw
	TKPSVNFTDEEIQELTVR	Q9SN86	1	1	CID		45.7921	3.95736	1	1	1.41971e+06	2	1053.51	2106.02	-23.5325	55.0454	18853	18853	MS2	28/51	R_Col_0_1.raw
	AGAGSATLSMAYAAAR	Q9SN86	1	1	CID		46.9678	3.91508	1	1	4287021	2	735.342	1469.68	649.707	40.8165	13234	13234	MS2	27/45	R_Col_0_1.raw
	LIDVDVPVIGGHAGITILPLLSK	Q9SN86	1	1	CID		46.5854	3.73608	1	1	541743	2	1171.02	2341.03	271.759	90.93	32863	32863	MS2	21/66	R_Col_0_1.raw
	KLFGVTTLDVVR	Q9ZP06;Q9SN86;Q9LKA3	3	3	CID		17.4737	3.71774	1	1	6.50844e+06	2	674.841	1348.67	648.31	50.7953	17174	17174	MS2	18/33	R_Col_0_1.raw
	GVAFANKPAAAAAN	Q9SN86	1	1	CID		7.44411	3.65946	1	1	1.1923e+06	2	636.84	1272.67	2.22258	20.9944	5366	5366	MS2	25/39	R_Col_0_1.raw
	LFGVTTLDVVR	Q9ZP06;Q9SN86;Q9LKA3	3	3	CID		38.4584	3.63283	1	1	1502888	2	610.423	1219.84	109.444	65.7155	23046	23046	MS2	23/30	R_Col_0_1.raw
	LFGVTTLDVVR	Q9ZP06;Q9SN86;Q9LKA3	3	3	CID		28.587	3.55687	1	1	1.2847e+06	2	610.923	1220.84	928.479	65.5525	22982	22982	MS2	23/30	R_Col_0_1.raw
	VAVLGAAGGIGQPLSLLIK	Q9SN86	1	1	CID		25.3785	3.30426	1	1	1.1285e+06	2	888.928	1776.85	-138.365	86.1624	31006	31006	MS2	19/54	R_Col_0_1.raw
	MSPLVSTLHLYDIANVK	Q9SN86	1	1	CID		77.4504	3.30122	1	1	742616	2	950.346	1899.68	-703.077	70.8242	25021	25021	MS2	18/48	R_Col_0_1.raw
	DFTGPSELADcLKDVNVVVIPAGVPR	Q9SN86	1	1	CID	C11(Carbamidomethyl)	41.1912	3.24279	1	1	591847	2	1385.27	2769.53	399.276	86.6565	31199	31199	MS2	16/75	R_Col_0_1.raw
Q9M9K1	20.18	7	560	60.726	5.84619	145.199	Probable 2,3-bisphosphoglycerate-independent phosphoglycerate mutase 2 OS=Arabidopsis thaliana GN=At3g08590 PE=1 SV=1 - [PMG2_ARATH]
	Sequence	Protein Accessions	# Proteins	# Protein Groups	Activation Type	Modifications	Probability	XCorr	Δ Score	Rank	Intensity	Charge	m/z [Da]	MH+ [Da]	ΔM [ppm]	RT [min]	First Scan	Last Scan	MS Order	Ions Matched	Spectrum File	Annotation
	LEEYVEIPSDSGISFNVQPK	Q9M9K1;O04499	2	2	CID		15.5002	4.11449	1	1	2.44479e+06	2	1126.02	2251.02	-39.2201	70.8489	25030	25030	MS2	25/57	R_Col_0_1.raw
	AEPGANDQYLPSFVIVDDNGK	Q9M9K1	1	1	CID		55.6788	3.97743	1	1	1.59796e+06	2	1125.6	2250.19	497.36	69.4773	24497	24497	MS2	24/60	R_Col_0_1.raw
	GTVHLIGLLSDGGVHSR	Q9M9K1	1	1	CID		32.7147	3.71935	1	1	4.77758e+06	3	573.505	1718.5	329.849	42.1766	13772	13772	MS2	31/96	R_Col_0_1.raw
	GWDAQVLGEAPHK	Q9M9K1;O04499	2	2	CID		40.437	3.7078	1	1	6.72933e+06	2	704.508	1408.01	217.868	35.3246	11055	11055	MS2	20/36	R_Col_0_1.raw
	YAGMLQYDGELKLPSR	Q9M9K1;O04499	2	2	CID		29.9815	3.29904	1	1	1.75889e+06	2	921.429	1841.85	501.574	55.1448	18892	18892	MS2	20/45	R_Col_0_1.raw
	AVGPIVDGDAVVTFNFR	Q9M9K1;O04499	2	2	CID		6.43555	3.22673	1	1	929944	2	889.428	1777.85	517.955	79.5619	28430	28430	MS2	17/48	R_Col_0_1.raw
	LDQVQLLLK	Q9M9K1	1	1	CID		9.00739	3.21491	1	1	5.42811e+06	2	535.421	1069.84	162.214	51.6227	17500	17500	MS2	19/24	R_Col_0_1.raw
P30184	28.27	11	520	54.475	5.92236	144.509	Leucine aminopeptidase 1 OS=Arabidopsis thaliana GN=LAP1 PE=1 SV=1 - [AMPL1_ARATH]
	Sequence	Protein Accessions	# Proteins	# Protein Groups	Activation Type	Modifications	Probability	XCorr	Δ Score	Rank	Intensity	Charge	m/z [Da]	MH+ [Da]	ΔM [ppm]	RT [min]	First Scan	Last Scan	MS Order	Ions Matched	Spectrum File	Annotation
	VQWMHIDMAGPVWNEK	P30184	1	1	CID		69.1052	5.9522	1	1	201974	2	971.596	1942.19	654.252	66.9225	23505	23505	MS2	27/45	R_Col_0_1.raw
	LSSVSALASGIVLGLFEDGR	P30184	1	1	CID		74.6089	5.24121	1	1	838354	2	996.597	1992.19	554.89	100.769	36713	36713	MS2	21/57	R_Col_0_1.raw
	SGTGFGVATLVEWVQK	P30184	1	1	CID		47.6643	4.82361	1	1	1.58013e+06	2	840.594	1680.18	773.917	83.4885	29962	29962	MS2	21/45	R_Col_0_1.raw
	LSSVSALASGIVLGLFEDGR	P30184	1	1	CID		121.293	4.7092	1	1	765320	2	996.18	1991.35	136.639	100.957	36787	36787	MS2	20/57	R_Col_0_1.raw
	ELINSPANVLTPAVLAEEAAK	P30184	1	1	CID		68.2714	4.66875	1	1	3.41451e+06	2	1076.1	2151.19	473.678	78.267	27926	27926	MS2	25/60	R_Col_0_1.raw
	ELINSPANVLTPAVLAEEAAK	P30184	1	1	CID		1	4.47666	1	1	1.02425e+06	3	717.758	2151.26	506.329	77.7274	27716	27716	MS2	28/120	R_Col_0_1.raw
	ELINSPANVLTPAVLAEEAAK	P30184	1	1	CID		60.5196	4.45586	1	1	2168967	2	1075.6	2150.19	8.81362	78.4553	28000	28000	MS2	22/60	R_Col_0_1.raw
	IALIGLGQSVSSPVAFHSLGEAVATVSK	P30184	1	1	CID		23.0868	3.83191	1	1	1.0255e+06	3	913.929	2739.77	460.706	81.7017	29265	29265	MS2	32/162	R_Col_0_1.raw
	VASTYSDVFTANILNEEQcK	P30184	1	1	CID	C19(Carbamidomethyl)	87.9214	3.37315	1	1	44680.4	2	1144.6	2288.19	-383.872	67.5193	23730	23730	MS2	27/57	R_Col_0_1.raw
	AGGSITAALFLK	P30184	3	1	CID		16.3726	3.23721	1	1	1.48661e+06	2	575.255	1149.5	727.201	60.6147	21044	21044	MS2	16/33	R_Col_0_1.raw
	FDMGGSAAVLGAAK	P30184	2	1	CID		7.82401	3.14575	1	1	5367762	2	648.34	1295.67	792.464	47.7902	15990	15990	MS2	22/39	R_Col_0_1.raw
Q56YW9	19.33	8	450	50.701	4.80518	143.692	Tubulin beta-2 chain OS=Arabidopsis thaliana GN=TUBB2 PE=2 SV=2 - [TBB2_ARATH]
	Sequence	Protein Accessions	# Proteins	# Protein Groups	Activation Type	Modifications	Probability	XCorr	Δ Score	Rank	Intensity	Charge	m/z [Da]	MH+ [Da]	ΔM [ppm]	RT [min]	First Scan	Last Scan	MS Order	Ions Matched	Spectrum File	Annotation
	GHYTEGAELIDSVLDVVR	P29516;Q56YW9;P29517;P29515	5	4	CID		107.678	5.80899	1	1	1.3577e+06	2	987.513	1974.02	517.617	82.2873	29493	29493	MS2	27/51	R_Col_0_1.raw
	GHYTEGAELIDSVLDVVR	P29516;Q56YW9;P29517;P29515	5	4	CID		132.918	4.69044	1	1	1.39408e+06	2	986.847	1972.69	-157.943	82.4332	29550	29550	MS2	25/51	R_Col_0_1.raw
	GHYTEGAELIDSVLDVVR	P29516;Q56YW9;P29517;P29515	5	4	CID		26.1945	3.89215	1	1	1.79182e+06	3	658.424	1973.26	131.109	82.2019	29460	29460	MS2	35/102	R_Col_0_1.raw
	EILHIQGGQcGNQIGAK	P29516;Q56YW9;P29517	4	3	CID	C10(Carbamidomethyl)	39.3332	3.8773	1	1	907534	2	911.929	1822.85	-40.1556	28.3059	8279	8279	MS2	21/48	R_Col_0_1.raw
	MMLTFSVFPSPK	P29516;Q56YW9;P29513;P29514;P12411	5	5	CID		13.6222	3.60965	1	1	1.83871e+06	2	692.924	1384.84	101.697	75.1395	26704	26704	MS2	19/33	R_Col_0_1.raw
	VSEQFTAMFR	P29516;Q56YW9;P29513;P29514;P29517;P29515;P12411	8	7	CID		50.4426	3.53256	1	1	5.45071e+06	2	608.339	1215.67	72.8701	50.568	17084	17084	MS2	18/27	R_Col_0_1.raw
	NSSYFVEWIPNNVK	P29516;Q56YW9;P29513;P29514;P29517;P29515;P12411	8	7	CID		8.60537	3.4125	1	1	4.08286e+06	2	849.511	1698.01	695.506	68.3614	24058	24058	MS2	17/39	R_Col_0_1.raw
	FWEVVcAEHGIDPTGR	Q56YW9	1	1	CID	C6(Carbamidomethyl)	23.5685	3.10489	1	1	874540	2	936.929	1872.85	-10.22	54.646	18695	18695	MS2	18/45	R_Col_0_1.raw
Q9SLF7	71.3	21	115	11.4369	4.67822	143.335	60S acidic ribosomal protein P2-2 OS=Arabidopsis thaliana GN=RPP2B PE=1 SV=1 - [RLA22_ARATH]
	Sequence	Protein Accessions	# Proteins	# Protein Groups	Activation Type	Modifications	Probability	XCorr	Δ Score	Rank	Intensity	Charge	m/z [Da]	MH+ [Da]	ΔM [ppm]	RT [min]	First Scan	Last Scan	MS Order	Ions Matched	Spectrum File	Annotation
	TILGSVGAETEDSQIELLLK	Q9SLF7	1	1	CID		55.7785	5.84557	1	1	1.45163e+06	2	1059.01	2117.02	417.39	81.0081	28995	28995	MS2	23/57	R_Col_0_1.raw
	LASVPSGGGGGVAVASATSGGGGGGGASAAESK	Q9SLF7	1	1	CID		97.3094	5.60672	1	1	1.13893e+06	2	1295.1	2589.2	364.218	32.3395	9876	9876	MS2	28/96	R_Col_0_1.raw
	TILGSVGAETEDSQIELLLK	Q9SLF7	1	1	CID		11.797	4.87528	1	1	1.14515e+06	2	1059.18	2117.36	574.756	82.3891	29533	29533	MS2	20/57	R_Col_0_1.raw
	EKLASVPSGGGGGVAVASATSGGGGGGGASAAESK	Q9SLF7	1	1	CID		84.5398	4.63405	1	1	1.1853e+06	3	949.429	2846.27	309.425	29.7455	8850	8850	MS2	41/204	R_Col_0_1.raw
	GKDLAELIAAGR	Q9SLF7;P51407	2	2	CID		34.8908	4.51885	1	1	23209424	2	607.423	1213.84	121.892	39.4925	12710	12710	MS2	22/33	R_Col_0_1.raw
	LASVPSGGGGGVAVASATSGGGGGGGASAAESK	Q9SLF7	1	1	CID		46.5358	4.51456	1	1	3.08284e+06	3	863.594	2588.77	198.279	32.5595	9963	9963	MS2	45/192	R_Col_0_1.raw
	VVAAYLLAVLSGK	Q9SLF7	1	1	CID		40.6365	4.21425	1	1	2987665	2	652.423	1303.84	31.6205	86.204	31022	31022	MS2	23/36	R_Col_0_1.raw
	VVAAYLLAVLSGK	Q9SLF7	1	1	CID		51.8475	3.912	1	1	952402	2	652.423	1303.84	31.6205	84.8433	30491	30491	MS2	23/36	R_Col_0_1.raw
	TILGSVGAETEDSQIELLLK	Q9SLF7	1	1	CID		39.2267	3.58482	1	1	13029.9	2	1059.1	2117.19	496.079	121.976	43810	43810	MS2	15/57	R_Col_0_1.raw
	MKVVAAYLLAVLSGK	Q9SLF7	1	1	CID		1	3.56082	1	1	1.15971e+06	2	782.426	1563.84	582.402	82.165	29446	29446	MS2	18/42	R_Col_0_1.raw
	TILGSVGAETEDSQIELLLK	Q9SLF7	1	1	CID		9.07413	3.52184	1	1	17223.2	2	1058.43	2115.86	-133.783	125.385	44909	44909	MS2	19/57	R_Col_0_1.raw
	MKVVAAYLLAVLSGK	Q9SLF7	1	1	CID		1	3.4939	1	1	982131	2	781.759	1562.51	-270.444	82.611	29619	29619	MS2	18/42	R_Col_0_1.raw
	TILGSVGAETEDSQIELLLK	Q9SLF7	1	1	CID		26.9887	3.47377	1	1	1.07335e+06	2	1059.1	2117.19	496.079	83.7658	30070	30070	MS2	15/57	R_Col_0_1.raw
	VVAAYLLAVLSGK	Q9SLF7	1	1	CID		18.4478	3.45241	1	1	569231	2	653.007	1305.01	925.603	92.5165	33483	33483	MS2	18/36	R_Col_0_1.raw
	TILGSVGAETEDSQIELLLK	Q9SLF7	1	1	CID		14.1211	3.41644	1	1	13117.6	2	1058.43	2115.86	-133.783	112.68	40826	40826	MS2	19/57	R_Col_0_1.raw
	TILGSVGAETEDSQIELLLK	Q9SLF7	1	1	CID		30.3935	3.40538	1	1	18127.3	2	1058.85	2116.69	259.974	127.98	45749	45749	MS2	14/57	R_Col_0_1.raw
	VVAAYLLAVLSGK	Q9SLF7	1	1	CID		25.4862	3.34464	1	1	14154	2	652.757	1304.51	542.663	123.329	44248	44248	MS2	18/36	R_Col_0_1.raw
	DLAELIAAGR	Q9SLF7;P51407	2	2	CID		1	3.17243	1	1	1.31378e+06	2	515.421	1029.83	1224.31	61.0321	21209	21209	MS2	17/27	R_Col_0_1.raw
	VVAAYLLAVLSGK	Q9SLF7	1	1	CID		28.8286	3.10232	1	1	18942.3	2	652.423	1303.84	31.6205	129.025	46085	46085	MS2	21/36	R_Col_0_1.raw
	TILGSVGAETEDSQIELLLK	Q9SLF7	1	1	CID		1	3.0946	1	1	709208	2	1059.01	2117.02	417.39	98.0162	35634	35634	MS2	15/57	R_Col_0_1.raw
	GKDLAELIAAGR	Q9SLF7;P51407	2	2	CID		27.7631	2.78055	1	1	1.77939e+06	1	1213.77	1213.77	64.0009	39.3373	12650	12650	MS2	16/33	R_Col_0_1.raw
Q9ZU25	24.25	11	503	54.3677	6.32861	143.24	Probable mitochondrial-processing peptidase subunit alpha-1, mitochondrial OS=Arabidopsis thaliana GN=At1g51980 PE=1 SV=1 - [MPPA1_ARATH]
	Sequence	Protein Accessions	# Proteins	# Protein Groups	Activation Type	Modifications	Probability	XCorr	Δ Score	Rank	Intensity	Charge	m/z [Da]	MH+ [Da]	ΔM [ppm]	RT [min]	First Scan	Last Scan	MS Order	Ions Matched	Spectrum File	Annotation
	EAVTATVLQMLMGGGGSFSAGGPGK	Q9ZU25	1	1	CID		66.4033	5.23231	1	1	1.2008e+06	2	1162.6	2324.19	451.996	95.0384	34469	34469	MS2	25/72	R_Col_0_1.raw
	EIEAIGGNTSASASR	Q9ZU25	2	1	CID		79.5768	4.93296	1	1	1.71124e+06	2	732.425	1463.84	771.587	21.673	5636	5636	MS2	26/42	R_Col_0_1.raw
	MVLAASGVEHEELLK	Q9ZU25	1	1	CID		50.5064	4.51957	1	1	2.40745e+06	2	813.427	1625.85	-6.70044	43.0177	14106	14106	MS2	25/42	R_Col_0_1.raw
	LNGELLEEFMTENFTAAR	Q9ZU25	1	1	CID		36.6169	4.42948	0.280198	1	1314673	2	1043.51	2086.02	491.674	89.1298	32163	32163	MS2	20/51	R_Col_0_1.raw
	NPAFLDWEVNEELRK	Q9ZU25	2	1	CID		58.8941	3.92768	1	1	914973	2	931.012	1861.02	584.842	59.8016	20727	20727	MS2	20/42	R_Col_0_1.raw
	TYVPEMVEVLIDSVR	Q9ZU25	2	1	CID		57.7161	3.8546	1	1	902239	3	584.005	1750	52.9683	98.2432	35723	35723	MS2	33/84	R_Col_0_1.raw
	TYVPEMVEVLIDSVR	Q9ZU25	2	1	CID		41.4722	3.75833	1	1	1.74431e+06	2	875.928	1750.85	536.371	98.1899	35702	35702	MS2	22/42	R_Col_0_1.raw
	EIEAIGGNTSASASR	Q9ZU25	2	1	CID		1	3.7515	1	1	827237	2	731.842	1462.68	-25.4373	22.2647	5873	5873	MS2	21/42	R_Col_0_1.raw
	NPAFLDWEVNEELRK	Q9ZU25	2	1	CID		34.9649	3.74931	1	1	914140	2	930.512	1860.02	47.5168	60.3568	20944	20944	MS2	18/42	R_Col_0_1.raw
	LNGELLEEFMTENFTAAR	Q9ZU25	1	1	CID		44.3436	3.52618	1	1	2.41395e+06	2	1042.93	2084.85	-67.6527	89.5797	32337	32337	MS2	18/51	R_Col_0_1.raw
	VAEPLTSDLPNVPPQLAPK	Q9ZU25	1	1	CID		23.4167	3.20535	1	1	786446	2	994.013	1987.02	467.458	65.3443	22901	22901	MS2	15/54	R_Col_0_1.raw
P29516	21.6	8	449	50.574	4.83057	140.646	Tubulin beta-8 chain OS=Arabidopsis thaliana GN=TUBB8 PE=2 SV=2 - [TBB8_ARATH]
	Sequence	Protein Accessions	# Proteins	# Protein Groups	Activation Type	Modifications	Probability	XCorr	Δ Score	Rank	Intensity	Charge	m/z [Da]	MH+ [Da]	ΔM [ppm]	RT [min]	First Scan	Last Scan	MS Order	Ions Matched	Spectrum File	Annotation
	GHYTEGAELIDSVLDVVR	P29516;Q56YW9;P29517;P29515	5	4	CID		107.678	5.80899	1	1	1.3577e+06	2	987.513	1974.02	517.617	82.2873	29493	29493	MS2	27/51	R_Col_0_1.raw
	GHYTEGAELIDSVLDVVR	P29516;Q56YW9;P29517;P29515	5	4	CID		132.918	4.69044	1	1	1.39408e+06	2	986.847	1972.69	-157.943	82.4332	29550	29550	MS2	25/51	R_Col_0_1.raw
	SGPYGQIFRPDNFVFGQSGAGNNWAK	P29516;P29515;P12411	3	3	CID		24.1819	4.09887	1	1	905353	3	939.096	2815.27	331.804	71.324	25216	25216	MS2	29/150	R_Col_0_1.raw
	GHYTEGAELIDSVLDVVR	P29516;Q56YW9;P29517;P29515	5	4	CID		26.1945	3.89215	1	1	1.79182e+06	3	658.424	1973.26	131.109	82.2019	29460	29460	MS2	35/102	R_Col_0_1.raw
	EILHIQGGQcGNQIGAK	P29516;Q56YW9;P29517	4	3	CID	C10(Carbamidomethyl)	39.3332	3.8773	1	1	907534	2	911.929	1822.85	-40.1556	28.3059	8279	8279	MS2	21/48	R_Col_0_1.raw
	MMLTFSVFPSPK	P29516;Q56YW9;P29513;P29514;P12411	5	5	CID		13.6222	3.60965	1	1	1.83871e+06	2	692.924	1384.84	101.697	75.1395	26704	26704	MS2	19/33	R_Col_0_1.raw
	VSEQFTAMFR	P29516;Q56YW9;P29513;P29514;P29517;P29515;P12411	8	7	CID		50.4426	3.53256	1	1	5.45071e+06	2	608.339	1215.67	72.8701	50.568	17084	17084	MS2	18/27	R_Col_0_1.raw
	NSSYFVEWIPNNVK	P29516;Q56YW9;P29513;P29514;P29517;P29515;P12411	8	7	CID		8.60537	3.4125	1	1	4.08286e+06	2	849.511	1698.01	695.506	68.3614	24058	24058	MS2	17/39	R_Col_0_1.raw
Q56WD9	38.31	12	462	48.548	8.33838	140.282	3-ketoacyl-CoA thiolase 2, peroxisomal OS=Arabidopsis thaliana GN=PED1 PE=1 SV=2 - [THIK2_ARATH]
	Sequence	Protein Accessions	# Proteins	# Protein Groups	Activation Type	Modifications	Probability	XCorr	Δ Score	Rank	Intensity	Charge	m/z [Da]	MH+ [Da]	ΔM [ppm]	RT [min]	First Scan	Last Scan	MS Order	Ions Matched	Spectrum File	Annotation
	TNLNPSEVGDIVVGTVLAPGSQR	Q56WD9	1	1	CID		35.5506	5.53737	1	1	832903	2	1162.52	2324.03	344.556	82.4009	29538	29538	MS2	29/66	R_Col_0_1.raw
	DGTTTAGNSSQVSDGAGAVLLMK	Q56WD9	1	1	CID		79.1607	4.85933	1	1	964733	2	1091.1	2181.19	522.614	54.9253	18807	18807	MS2	22/66	R_Col_0_1.raw
	AGFYDIGIGAGLESMTTNPMAWEGSVNPAVK	Q56WD9	1	1	CID		2.82544	4.72917	1	1	828650	3	1062.01	3184.03	162.354	94.5333	34271	34271	MS2	38/180	R_Col_0_1.raw
	TFAAVGVDPAIMGIGPAVAIPAAVK	Q56WD9	1	1	CID		28.1669	4.70967	1	1	1.50902e+06	2	1168.77	2336.53	94.8067	87.8687	31670	31670	MS2	23/72	R_Col_0_1.raw
	TFAAVGVDPAIMGIGPAVAIPAAVK	Q56WD9	1	1	CID		44.3385	4.59884	1	1	1.2304e+06	2	1168.1	2335.19	-476.124	88.1049	31762	31762	MS2	24/72	R_Col_0_1.raw
	FAQAQNcLLPMGVTSENVAQR	Q56WD9	1	1	CID	C7(Carbamidomethyl)	66.4454	4.46345	1	1	920310	2	1168.1	2335.19	453.9	57.6729	19890	19890	MS2	22/60	R_Col_0_1.raw
	INVNGGAMAIGHPLGATGAR	Q56WD9	1	1	CID		29.4048	3.82563	1	1	1.33679e+06	2	939.512	1878.02	551.816	38.9367	12492	12492	MS2	17/57	R_Col_0_1.raw
	QcSSGLQAVADVAAAIK	Q56WD9	2	1	CID	C2(Carbamidomethyl)	7.72684	3.58187	1	1	1.6366e+06	2	845.427	1689.85	581.988	68.1737	23985	23985	MS2	17/48	R_Col_0_1.raw
	GNFKDTYPDDLLAPVLR	Q56WD9	1	1	CID		67.8947	3.36434	1	1	447844	2	968.096	1935.19	611.488	65.4059	22926	22926	MS2	20/48	R_Col_0_1.raw
	DTYPDDLLAPVLR	Q56WD9	1	1	CID		1	3.24145	1	1	965938	2	745.009	1489.01	829.972	77.7343	27719	27719	MS2	15/36	R_Col_0_1.raw
	QcSSGLQAVADVAAAIK	Q56WD9	2	1	CID	C2(Carbamidomethyl)	27.392	3.20979	1	1	1.09869e+06	2	845.011	1689.01	88.8806	68.2373	24010	24010	MS2	14/48	R_Col_0_1.raw
	GNFKDTYPDDLLAPVLR	Q56WD9	1	1	CID		31.8598	3.11087	1	1	1.70326e+06	2	967.596	1934.19	94.7806	66.1881	23233	23233	MS2	18/48	R_Col_0_1.raw
O65390	36.96	17	506	54.5785	5.5415	140.109	Aspartic proteinase A1 OS=Arabidopsis thaliana GN=APA1 PE=1 SV=1 - [APA1_ARATH]
	Sequence	Protein Accessions	# Proteins	# Protein Groups	Activation Type	Modifications	Probability	XCorr	Δ Score	Rank	Intensity	Charge	m/z [Da]	MH+ [Da]	ΔM [ppm]	RT [min]	First Scan	Last Scan	MS Order	Ions Matched	Spectrum File	Annotation
	TVVDQYGQTILDLLLSETQPK	O65390	1	1	CID		79.0888	5.11047	1	1	108336	2	1181.6	2362.19	397.352	104.082	37989	37989	MS2	24/60	R_Col_0_1.raw
	TVVDQYGQTILDLLLSETQPK	O65390	1	1	CID		82.7807	5.09922	1	1	88502.8	2	1180.68	2360.36	-379.072	104.265	38056	38056	MS2	26/60	R_Col_0_1.raw
	TVVDQYGQTILDLLLSETQPK	O65390	1	1	CID		82.2309	4.69715	1	1	108768	3	788.009	2362.01	321.29	105.495	38492	38492	MS2	29/120	R_Col_0_1.raw
	VGEGPVAQcISGFIALDVAPPR	O65390	1	1	CID	C9(Carbamidomethyl)	102.262	4.37559	1	1	750024	2	1126.6	2252.19	-434.413	85.9568	30927	30927	MS2	22/63	R_Col_0_1.raw
	GPLWILGDVFMGK	O65390	2	1	CID		55.3028	4.26883	1	1	4058018	2	717.508	1434.01	866.844	94.1916	34136	34136	MS2	27/36	R_Col_0_1.raw
	NADEEEGGELVFGGVDPNHFK	O65390	1	1	CID		45.425	4.16788	1	1	970299	2	1131.02	2261.02	446.465	56.0053	19236	19236	MS2	22/60	R_Col_0_1.raw
	FDGILGLGFQEISVGK	O65390	1	1	CID		10.3583	4.05416	1	1	1.44157e+06	2	840.51	1680.01	67.4045	84.8742	30503	30503	MS2	24/45	R_Col_0_1.raw
	FDGILGLGFQEISVGK	O65390	1	1	CID		19.7454	3.99344	1	1	1.01791e+06	2	840.844	1680.68	464.05	86.907	31296	31296	MS2	18/45	R_Col_0_1.raw
	YHTVFDFGNEQVGFAEAA	O65390	1	1	CID		41.7656	3.87243	1	1	2.52733e+06	2	1001.51	2002.02	60.9627	74.9578	26633	26633	MS2	19/51	R_Col_0_1.raw
	NADEEEGGELVFGGVDPNHFK	O65390	1	1	CID		34.1375	3.85528	1	1	631226	2	1131.02	2261.02	446.465	57.4095	19788	19788	MS2	18/60	R_Col_0_1.raw
	DQEFIEATKEPGITFVVAK	O65390	1	1	CID		39.0991	3.84955	1	1	424150	2	1062.01	2123.02	431.191	63.15	22041	22041	MS2	16/54	R_Col_0_1.raw
	YHTVFDFGNEQVGFAEAA	O65390	1	1	CID		52.3159	3.68678	1	1	1.58331e+06	2	1001.93	2002.85	477.018	74.8308	26584	26584	MS2	18/51	R_Col_0_1.raw
	FDGILGLGFQEISVGK	O65390	1	1	CID		34.7173	3.65328	1	1	861709	3	561.088	1681.25	803.096	85.5031	30750	30750	MS2	31/90	R_Col_0_1.raw
	ILNYVNELcER	O65390	1	1	CID	C9(Carbamidomethyl)	40.7531	3.64696	1	1	8231276	2	711.925	1422.84	96.5432	48.0104	16076	16076	MS2	20/30	R_Col_0_1.raw
	LPSPMGESAVDcAQLSTMPTVSLTIGGK	O65390	1	1	CID	C12(Carbamidomethyl)	26.7032	3.55652	1	1	738747	2	1424.27	2847.54	50.0004	78.8979	28173	28173	MS2	23/81	R_Col_0_1.raw
	VGEGPVAQcISGFIALDVAPPR	O65390	1	1	CID	C9(Carbamidomethyl)	95.7952	3.47858	1	1	530791	2	1126.6	2252.19	-434.413	84.4242	30328	30328	MS2	24/63	R_Col_0_1.raw
	FTVVFDTGSSNLWVPSSK	O65390	1	1	CID		3.5856	3.09154	1	1	1.01418e+06	2	986.513	1972.02	524.02	76.479	27228	27228	MS2	16/51	R_Col_0_1.raw
Q56YU0	29.94	11	501	54.3255	5.69385	139.966	Aldehyde dehydrogenase family 2 member C4 OS=Arabidopsis thaliana GN=ALDH2C4 PE=1 SV=2 - [AL2C4_ARATH]
	Sequence	Protein Accessions	# Proteins	# Protein Groups	Activation Type	Modifications	Probability	XCorr	Δ Score	Rank	Intensity	Charge	m/z [Da]	MH+ [Da]	ΔM [ppm]	RT [min]	First Scan	Last Scan	MS Order	Ions Matched	Spectrum File	Annotation
	YGLAAGILSQDIDLINTVSR	Q56YU0	1	1	CID		81.3086	5.68202	1	1	714404	2	1060.1	2119.19	23.2831	91.4751	33076	33076	MS2	25/57	R_Col_0_1.raw
	ILSYIEHGKNEGATLLTGGK	Q56YU0	1	1	CID		10.1261	4.86506	1	1	1.75875e+06	2	1051.68	2102.36	583.276	42.2949	13820	13820	MS2	20/57	R_Col_0_1.raw
	LFINGQFIDAASGK	Q56YU0	1	1	CID		41.0879	4.1933	1	1	1.97871e+06	2	741.009	1481.01	155.469	58.59	20249	20249	MS2	19/39	R_Col_0_1.raw
	IYQDEIFGPVMSLMK	Q56YU0	1	1	CID		24.2552	4.12193	1	1	993738	2	886.428	1771.85	546.412	87.9655	31708	31708	MS2	18/42	R_Col_0_1.raw
	ILSYIEHGKNEGATLLTGGK	Q56YU0	1	1	CID		18.7741	3.97993	1	1	1.01849e+06	2	1050.68	2100.36	-368.407	42.6181	13948	13948	MS2	20/57	R_Col_0_1.raw
	EPIGVVGNIIPWNFPSIMFATK	Q56YU0	1	1	CID		25.2712	3.78834	1	1	111411	3	811.01	2431.02	298.627	103.147	37643	37643	MS2	25/126	R_Col_0_1.raw
	SPLLIFNDADIDK	Q56YU0	1	1	CID		44.9411	3.75495	1	1	37330.5	2	731.592	1462.18	966.282	66.8607	23482	23482	MS2	23/36	R_Col_0_1.raw
	GYFIQPTIFADVTEDMK	Q56YU0	1	1	CID		18.107	3.66589	1	1	883669	2	988.013	1975.02	34.1801	87.3792	31480	31480	MS2	19/48	R_Col_0_1.raw
	AKDWTVGDPFDSTAR	Q56YU0	1	1	CID		7.74785	3.62187	1	1	2099391	2	833.427	1665.85	35.9456	44.3741	14641	14641	MS2	18/42	R_Col_0_1.raw
	YGLAAGILSQDIDLINTVSR	Q56YU0	1	1	CID		10.0312	3.58512	1	1	1.21855e+06	3	707.508	2120.51	645.902	91.5266	33096	33096	MS2	25/114	R_Col_0_1.raw
	FADLIEENIEELAK	Q56YU0	1	1	CID		46.1685	3.56417	1	1	1.97202e+06	2	817.51	1634.01	110.593	81.3617	29132	29132	MS2	22/39	R_Col_0_1.raw
O82662	23.52	10	421	45.3169	6.7124	139.766	Succinate--CoA ligase [ADP-forming] subunit beta, mitochondrial OS=Arabidopsis thaliana GN=At2g20420 PE=1 SV=1 - [SUCB_ARATH]
	Sequence	Protein Accessions	# Proteins	# Protein Groups	Activation Type	Modifications	Probability	XCorr	Δ Score	Rank	Intensity	Charge	m/z [Da]	MH+ [Da]	ΔM [ppm]	RT [min]	First Scan	Last Scan	MS Order	Ions Matched	Spectrum File	Annotation
	VPIDVFAGITDEDAAK	O82662	1	1	CID		108.435	4.93967	1	1	3.33899e+06	2	831.51	1662.01	704.171	68.8179	24237	24237	MS2	26/45	R_Col_0_1.raw
	KTDcTMLEINPLAETSTNQLVAADAK	O82662	1	1	CID	C4(Carbamidomethyl)	72.0054	4.5224	1	1	70699.5	2	1418.19	2835.37	344.977	66.4597	23338	23338	MS2	24/75	R_Col_0_1.raw
	VPIDVFAGITDEDAAK	O82662	1	1	CID		75.2722	4.24639	1	1	2.05606e+06	2	831.01	1661.01	102.542	69.4247	24476	24476	MS2	22/45	R_Col_0_1.raw
	AILVNIFGGIMK	O82662	1	1	CID		48.9866	4.09355	1	1	1.18743e+06	2	638.34	1275.67	-60.3159	82.5694	29603	29603	MS2	20/33	R_Col_0_1.raw
	cDVIASGIVNAAK	O82662	1	1	CID	C1(Carbamidomethyl)	23.0418	3.9778	1	1	8019765	2	659.424	1317.84	118.964	40.6293	13161	13161	MS2	20/36	R_Col_0_1.raw
	KGGTSIEDLAEKFPDMIIK	O82662	1	1	CID		22.2777	3.80091	1	1	3.06291e+06	3	698.424	2093.26	553.67	69.0977	24347	24347	MS2	29/108	R_Col_0_1.raw
	AILVNIFGGIMK	O82662	1	1	CID		42.427	3.71593	1	1	1.69752e+06	2	638.507	1276.01	200.937	83.9984	30161	30161	MS2	20/33	R_Col_0_1.raw
	GGTSIEDLAEKFPDMIIK	O82662	1	1	CID		1	3.37148	1	1	1.28756e+06	2	982.43	1963.85	-77.4836	78.6903	28091	28091	MS2	15/51	R_Col_0_1.raw
	LITADDLDDAAEK	O82662	1	1	CID		34.4393	3.24489	1	1	5025829	2	695.424	1389.84	120.08	39.3568	12656	12656	MS2	20/36	R_Col_0_1.raw
	cDVIASGIVNAAK	O82662	1	1	CID	C1(Carbamidomethyl)	1.01137	2.77963	1	1	989867	1	1317.85	1317.85	128.872	40.4818	13104	13104	MS2	13/36	R_Col_0_1.raw
Q42560	12.81	12	898	98.0897	6.40479	139.601	Aconitate hydratase 1 OS=Arabidopsis thaliana GN=ACO1 PE=1 SV=2 - [ACO1_ARATH]
	Sequence	Protein Accessions	# Proteins	# Protein Groups	Activation Type	Modifications	Probability	XCorr	Δ Score	Rank	Intensity	Charge	m/z [Da]	MH+ [Da]	ΔM [ppm]	RT [min]	First Scan	Last Scan	MS Order	Ions Matched	Spectrum File	Annotation
	EVAEVVQSSVLPDMFK	Q42560	1	1	CID		47.4065	4.48945	1	1	1.35409e+06	2	889.511	1778.02	62.635	73.3948	26023	26023	MS2	20/45	R_Col_0_1.raw
	EVAEVVQSSVLPDMFK	Q42560	1	1	CID		32.0171	4.20895	1	1	1.36019e+06	2	890.011	1779.02	624.719	73.0748	25900	25900	MS2	17/45	R_Col_0_1.raw
	VLLQDFTGVPAVVDLAcMR	Q9SIB9;Q42560	2	2	CID	C17(Carbamidomethyl)	14.2024	3.86495	1	1	1.02971e+06	3	702.424	2105.26	553.724	90.4631	32680	32680	MS2	29/108	R_Col_0_1.raw
	DGMTATDLVLTVTQMLR	Q42560	1	1	CID		26.8759	3.76345	1	1	58696.4	3	622.34	1865	28.6052	106.98	38990	38990	MS2	32/96	R_Col_0_1.raw
	DGMTATDLVLTVTQMLR	Q42560	1	1	CID		76.1273	3.75495	1	1	67304.1	2	933.512	1866.02	571.5	106.567	38853	38853	MS2	26/48	R_Col_0_1.raw
	SDDTVSMIEAYLR	Q42560	1	1	CID		41.6169	3.55732	1	1	1.96307e+06	2	751.009	1501.01	869.726	80.4866	28791	28791	MS2	19/36	R_Col_0_1.raw
	SNLVGMGIIPLcFK	Q9SIB9;Q42560	2	2	CID	C12(Carbamidomethyl)	9.57396	3.46621	1	1	3.43033e+06	2	775.509	1550.01	763.454	81.8235	29312	29312	MS2	20/39	R_Col_0_1.raw
	DGMTATDLVLTVTQmLR	Q42560	1	1	CID	M15(Oxidation)	37.8424	3.4196	1	1	72179.7	2	941.346	1881.68	392.458	106.202	38731	38731	MS2	21/48	R_Col_0_1.raw
	SENAVQANMELEFQR	Q9SIB9;Q42560	2	2	CID		42.1162	3.338	1	1	1.17312e+06	2	883.511	1766.02	112.023	52.102	17690	17690	MS2	16/42	R_Col_0_1.raw
	FDTEVELAYFDHGGILQYVIR	Q42560	1	1	CID		3.55967	3.22555	1	1	650113	2	1243.1	2485.2	-17.7127	92.2318	33372	33372	MS2	13/60	R_Col_0_1.raw
	VLLQDFTGVPAVVDLAcMR	Q9SIB9;Q42560	2	2	CID	C17(Carbamidomethyl)	129.824	3.22501	1	1	370344	2	1052.1	2103.19	-430.1	91.2152	32975	32975	MS2	27/54	R_Col_0_1.raw
	SENAVQANMELEFQR	Q9SIB9;Q42560	2	2	CID		54.2142	3.14958	1	1	2459562	2	883.511	1766.02	112.023	50.4987	17058	17058	MS2	20/42	R_Col_0_1.raw
Q9FWA3	16.67	10	486	53.5435	7.41553	139.336	6-phosphogluconate dehydrogenase, decarboxylating 3 OS=Arabidopsis thaliana GN=At3g02360 PE=2 SV=1 - [6GPD3_ARATH]
	Sequence	Protein Accessions	# Proteins	# Protein Groups	Activation Type	Modifications	Probability	XCorr	Δ Score	Rank	Intensity	Charge	m/z [Da]	MH+ [Da]	ΔM [ppm]	RT [min]	First Scan	Last Scan	MS Order	Ions Matched	Spectrum File	Annotation
	IGLAGLAVMGQNLALNIAEK	Q9FWA3;Q9SH69	2	2	CID		109.631	5.76357	1	1	2.09482e+06	2	999.097	1997.19	530.923	92.9914	33668	33668	MS2	27/57	R_Col_0_1.raw
	IGLAGLAVMGQNLALNIAEK	Q9FWA3;Q9SH69	2	2	CID		30.5575	5.12354	1	1	72667.5	2	998.93	1996.85	364.079	105.365	38447	38447	MS2	21/57	R_Col_0_1.raw
	MVHNGIEYGDMQLIAEAYDVLK	Q9FWA3	1	1	CID		56.943	4.28847	1	1	841389	2	1255.69	2510.36	459.198	86.4613	31123	31123	MS2	20/63	R_Col_0_1.raw
	IGLAGLAVMGQNLALNIAEK	Q9FWA3;Q9SH69	2	2	CID		48.9959	3.77911	1	1	1.03944e+06	3	666.174	1996.51	190.639	93.6057	33907	33907	MS2	33/114	R_Col_0_1.raw
	NAELANLLVDPEFAK	Q9FWA3	1	1	CID		44.0451	3.72358	1	1	1.31497e+06	2	823.01	1645.01	698.446	74.4911	26452	26452	MS2	17/42	R_Col_0_1.raw
	IcSYAQGMNLIR	Q9FWA3	1	1	CID	C2(Carbamidomethyl)	51.3502	3.49282	1	2	9462524	2	713.425	1425.84	101.185	49.3346	16598	16598	MS2	18/33	R_Col_0_1.raw
	AGGFGDILTDQK	Q9FWA3	1	1	CID		35.9601	3.49271	1	1	3.53195e+06	2	611.839	1222.67	867.274	44.6848	14763	14763	MS2	18/33	R_Col_0_1.raw
	IGLAGLAVMGQNLALNIAEK	Q9FWA3;Q9SH69	2	2	CID		1	3.33371	1	1	1.69465e+06	2	998.764	1996.52	197.179	94.3739	34208	34208	MS2	14/57	R_Col_0_1.raw
	IGLAGLAVMGQNLALNIAEK	Q9FWA3;Q9SH69	2	2	CID		33.2914	3.2814	1	1	17720.7	2	998.764	1996.52	197.179	125.499	44945	44945	MS2	19/57	R_Col_0_1.raw
	MVHNGIEYGDmQLIAEAYDVLK	Q9FWA3	1	1	CID	M11(Oxidation)	30.7363	3.13483		2	774713	2	1263.1	2525.2	-3.38227	83.0579	29795	29795	MS2	21/63	R_Col_0_1.raw
Q1H583	35.04	10	391	43.1662	7.10791	136.247	GDSL esterase/lipase 22 OS=Arabidopsis thaliana GN=GLL22 PE=1 SV=1 - [GDL18_ARATH]
	Sequence	Protein Accessions	# Proteins	# Protein Groups	Activation Type	Modifications	Probability	XCorr	Δ Score	Rank	Intensity	Charge	m/z [Da]	MH+ [Da]	ΔM [ppm]	RT [min]	First Scan	Last Scan	MS Order	Ions Matched	Spectrum File	Annotation
	NNPTADASAQQAFVTSVTNK	Q1H583	1	1	CID		120.674	5.08012	1	1	5161644	2	1032.93	2064.85	414.115	43.9993	14492	14492	MS2	25/57	R_Col_0_1.raw
	NSPASAPFQFTVFDFYNAVLTR	Q1H583	1	1	CID		51.2625	4.54783	1	1	2.29351e+06	3	831.427	2492.27	16.7321	100.947	36783	36783	MS2	33/126	R_Col_0_1.raw
	NNPTADASAQQAFVTSVTNK	Q1H583	1	1	CID		76.4774	4.26119	1	1	1.65218e+06	2	1032.43	2063.85	-70.224	45.5355	15099	15099	MS2	23/57	R_Col_0_1.raw
	GASFAVEGATLLGAPVESMTLNQQVK	Q1H583	1	1	CID		62.4037	4.07516	1	1	1.41779e+06	2	1309.69	2618.37	5.93606	82.107	29423	29423	MS2	21/75	R_Col_0_1.raw
	FVIQTLAPLGcLPIVR	Q8W4H8;Q1H583	2	2	CID	C11(Carbamidomethyl)	18.4068	3.8136	1	1	2.68845e+06	2	899.095	1797.18	76.2022	88.6064	31958	31958	MS2	17/45	R_Col_0_1.raw
	TLVAQGFWPYGK	Q1H583	1	1	CID		58.2788	3.63819	1	1	2.19268e+06	2	683.924	1366.84	91.7858	61.7004	21470	21470	MS2	22/33	R_Col_0_1.raw
	NSPASAPFQFTVFDFYNAVLTR	Q1H583	1	1	CID		30.7241	3.4165	1	1	705080	2	1246.93	2492.86	255.973	101.908	37160	37160	MS2	16/63	R_Col_0_1.raw
	LKNDISALYSSGASK	Q1H583	1	1	CID		32.2767	3.31279	1	1	800551	2	776.843	1552.68	-733.691	29.5686	8780	8780	MS2	19/42	R_Col_0_1.raw
	QEYNTGMDQcYEK	Q1H583	1	1	CID	C10(Carbamidomethyl)	59.7835	3.30846	1	1	1.39644e+06	2	833.26	1665.51	-83.244	23.1242	6214	6214	MS2	17/36	R_Col_0_1.raw
	FSDGLITPDFLAK	Q1H583	1	1	CID		12.5459	3.16178	1	1	1.04173e+06	2	712.675	1424.34	417.869	70.8033	25012	25012	MS2	17/36	R_Col_0_1.raw
Q9STX5	8.75	9	823	94.1459	5.03369	136.149	Endoplasmin homolog OS=Arabidopsis thaliana GN=HSP90-7 PE=1 SV=1 - [ENPL_ARATH]
	Sequence	Protein Accessions	# Proteins	# Protein Groups	Activation Type	Modifications	Probability	XCorr	Δ Score	Rank	Intensity	Charge	m/z [Da]	MH+ [Da]	ΔM [ppm]	RT [min]	First Scan	Last Scan	MS Order	Ions Matched	Spectrum File	Annotation
	IGGHGGLSTDSDVVHR	Q9STX5	1	1	CID		60.8056	4.5455	1	1	121062	3	536.171	1606.5	-183.088	17.3094	3980	3980	MS2	34/90	R_Col_0_1.raw
	FLALTDKDVLGEGDTAK	Q9STX5	1	1	CID		33.0818	4.51142	1	1	1.30434e+06	2	897.428	1793.85	510.826	50.2295	16952	16952	MS2	22/48	R_Col_0_1.raw
	IGGHGGLSTDSDVVHR	Q9STX5	1	1	CID		48.1584	4.14631	1	1	59161.7	3	536.588	1607.75	594.554	16.8455	3820	3820	MS2	33/90	R_Col_0_1.raw
	IGGHGGLSTDSDVVHR	Q9STX5	1	1	CID		45.0477	4.10677	1	1	32972.5	2	804.593	1608.18	861.613	17.3886	4008	4008	MS2	20/45	R_Col_0_1.raw
	LMDIIINSLYSNK	Q9STX5	1	1	CID		39.9513	3.89372	1	1	1.95192e+06	2	762.592	1524.18	238.445	75.5492	26866	26866	MS2	19/36	R_Col_0_1.raw
	ETVYEWELLNDVK	Q9STX5	1	1	CID		12.7148	3.87457	1	1	1.73732e+06	2	819.51	1638.01	126.39	69.4177	24473	24473	MS2	15/36	R_Col_0_1.raw
	LMDIIINSLYSNK	Q9STX5	1	1	CID		13.1231	3.7505	1	1	1534521	2	762.009	1523.01	-527.413	75.6387	26901	26901	MS2	19/36	R_Col_0_1.raw
	VFISDEFDELLPK	Q9STX5	1	1	CID		50.465	3.45585	1	1	1.70516e+06	2	776.426	1551.84	32.4162	83.3461	29906	29906	MS2	18/36	R_Col_0_1.raw
	VFISDEFDELLPK	Q9STX5	1	1	CID		25.392	3.41575	1	1	2.08153e+06	2	777.093	1553.18	890.86	83.1193	29818	29818	MS2	19/36	R_Col_0_1.raw
Q940P8	20.11	11	527	57.2496	5.87158	133.881	T-complex protein 1 subunit beta OS=Arabidopsis thaliana GN=CCT2 PE=1 SV=1 - [TCPB_ARATH]
	Sequence	Protein Accessions	# Proteins	# Protein Groups	Activation Type	Modifications	Probability	XCorr	Δ Score	Rank	Intensity	Charge	m/z [Da]	MH+ [Da]	ΔM [ppm]	RT [min]	First Scan	Last Scan	MS Order	Ions Matched	Spectrum File	Annotation
	ALVAIPTTIADNAGLDSAELVAQLR	Q940P8	1	1	CID		55.6492	5.01006	1	1	2.19479e+06	3	841.51	2522.52	53.2349	91.8384	33218	33218	MS2	37/144	R_Col_0_1.raw
	ALVAIPTTIADNAGLDSAELVAQLR	Q940P8	1	1	CID		54.5075	4.85632	1	1	1.24487e+06	2	1262.02	2523.03	256.579	91.7975	33202	33202	MS2	25/72	R_Col_0_1.raw
	VQDDEVGDGTTSVVVLAGELLR	Q940P8	1	1	CID		87.6743	4.64147	1	1	517432	2	1137.02	2273.03	377.594	92.0301	33293	33293	MS2	26/63	R_Col_0_1.raw
	MASFVGAMAISDLVK	Q940P8	1	1	CID		34.5627	4.17515	1	1	1.24368e+06	2	771.092	1541.18	899.677	79.2867	28323	28323	MS2	18/42	R_Col_0_1.raw
	RIENANILVANTAMDTDKVK	Q940P8	1	1	CID		47.6723	3.95421	1	1	3.91355e+06	3	739.759	2217.26	491.824	37.3211	11849	11849	MS2	31/114	R_Col_0_1.raw
	VDEIITcAPR	Q940P8	1	1	CID	C7(Carbamidomethyl)	24.5394	3.7034	1	1	4.85003e+06	2	587.756	1174.5	775.271	29.6337	8804	8804	MS2	20/27	R_Col_0_1.raw
	ALVAIPTTIADNAGLDSAELVAQLR	Q940P8	1	1	CID		36.4543	3.67515	1	1	1.62653e+06	3	841.844	2523.52	449.494	91.5677	33112	33112	MS2	30/144	R_Col_0_1.raw
	VQDDEVGDGTTSVVVLAGELLR	Q940P8	1	1	CID		32.6791	3.66935	1	1	945705	3	758.509	2273.51	591.697	91.9125	33248	33248	MS2	32/126	R_Col_0_1.raw
	ALVAIPTTIADNAGLDSAELVAQLR	Q940P8	1	1	CID		56.6242	3.63498	1	1	1.04318e+06	2	1261.69	2522.36	-7.66108	92.0813	33313	33313	MS2	22/72	R_Col_0_1.raw
	MASFVGAMAISDLVK	Q940P8	1	1	CID		80.6388	3.48671	1	1	1.28251e+06	2	770.426	1539.84	34.5507	79.4766	28397	28397	MS2	19/42	R_Col_0_1.raw
	VLLGGGWPEMVMAK	Q940P8	1	1	CID		18.1871	3.12202	1	1	1.00464e+06	2	744.425	1487.84	45.863	72.9259	25842	25842	MS2	16/39	R_Col_0_1.raw
Q9XI01	26.95	11	501	55.567	4.91943	133.667	Protein disulfide isomerase-like 1-1 OS=Arabidopsis thaliana GN=PDIL1-1 PE=1 SV=1 - [PDI11_ARATH]
	Sequence	Protein Accessions	# Proteins	# Protein Groups	Activation Type	Modifications	Probability	XCorr	Δ Score	Rank	Intensity	Charge	m/z [Da]	MH+ [Da]	ΔM [ppm]	RT [min]	First Scan	Last Scan	MS Order	Ions Matched	Spectrum File	Annotation
	TNVEVDQIESWVK	Q9XI01	1	1	CID		46.5931	4.72528	1	1	1.02589e+06	2	774.426	1547.84	691.011	63.5386	22192	22192	MS2	23/36	R_Col_0_1.raw
	VVVSDSLDDIVLNSGK	Q9XI01	1	1	CID		54.2788	4.04214	1	1	1334547	2	830.927	1660.85	581.964	63.4417	22154	22154	MS2	24/45	R_Col_0_1.raw
	AASALSSNVPPVVLAK	Q9XI01	1	1	CID		49.3917	4.04085	1	1	5.77041e+06	2	762.509	1524.01	86.1957	48.6963	16347	16347	MS2	20/45	R_Col_0_1.raw
	KEEETTEEVKDEL	Q9XI01	1	1	CID		61.9788	3.72394	1	1	2.85301e+06	2	789.926	1578.85	67.6615	23.9297	6536	6536	MS2	19/36	R_Col_0_1.raw
	IDASEETNREFATQYEVQGFPTIK	Q9XI01	1	1	CID		5.35404	3.71172	1	1	1.30408e+06	3	925.512	2774.52	428.939	60.5634	21024	21024	MS2	24/138	R_Col_0_1.raw
	LSGSEFDSFMAIAEK	Q9XI01	1	1	CID		13.0068	3.61878	1	1	1.45899e+06	2	816.51	1632.01	153.468	72.5367	25690	25690	MS2	18/42	R_Col_0_1.raw
	LDATANDFPKDTFDVK	Q9XI01	1	1	CID		46.6126	3.58271	1	1	1.80486e+06	2	898.512	1796.02	-475.684	46.7964	15597	15597	MS2	17/45	R_Col_0_1.raw
	LSGSEFDSFMAIAEK	Q9XI01	1	1	CID		8.82401	3.56805	1	1	1.65927e+06	2	817.093	1633.18	867.725	73.9335	26234	26234	MS2	14/42	R_Col_0_1.raw
	VVVVGIFPK	Q9XI01	1	1	CID		26.7581	3.36153	1	1	2961035	2	479.503	958	403.388	50.4812	17050	17050	MS2	19/24	R_Col_0_1.raw
	TNVEVDQIESWVK	Q9XI01	1	1	CID		16.0801	3.15733	1	1	664342	2	774.176	1547.34	368.094	64.0852	22406	22406	MS2	19/36	R_Col_0_1.raw
	SASGNVVVYEGDR	Q9SRG3;Q9XI01	2	2	CID		57.1078	3.10658	1	1	1.7781e+06	2	677.341	1353.67	760.778	22.2584	5870	5870	MS2	16/36	R_Col_0_1.raw
Q05431	48.4	19	250	27.5438	6.12549	131.461	L-ascorbate peroxidase 1, cytosolic OS=Arabidopsis thaliana GN=APX1 PE=1 SV=2 - [APX1_ARATH]
	Sequence	Protein Accessions	# Proteins	# Protein Groups	Activation Type	Modifications	Probability	XCorr	Δ Score	Rank	Intensity	Charge	m/z [Da]	MH+ [Da]	ΔM [ppm]	RT [min]	First Scan	Last Scan	MS Order	Ions Matched	Spectrum File	Annotation
	ELLSGEKEGLLQLVSDK	Q05431	1	1	CID		103.885	5.25351	1	1	717144	2	929.512	1858.02	0.10403	63.1215	22029	22029	MS2	24/48	R_Col_0_1.raw
	FDAEQAHGANSGIHIALR	Q05431	1	1	CID		67.7801	4.77333	1	1	1.72648e+06	2	953.929	1906.85	-52.7408	32.012	9747	9747	MS2	27/51	R_Col_0_1.raw
	FDAEQAHGANSGIHIALR	Q05431	1	1	CID		119.216	4.75853	1	1	6956977	3	636.673	1908	551.917	31.9095	9705	9705	MS2	42/102	R_Col_0_1.raw
	LAWHSAGTFDcQSR	Q05431	1	1	CID	C11(Carbamidomethyl)	12.6783	4.62113	1	1	10749098	3	546.338	1637	773.626	29.0402	8570	8570	MS2	33/78	R_Col_0_1.raw
	YAADEDAFFADYAEAHMK	Q05431	1	1	CID		69.8218	4.62083	1	1	2506644	2	1033.51	2066.02	559.833	61.0113	21200	21200	MS2	22/51	R_Col_0_1.raw
	SGFEGAWTSNPLIFDNSYFK	Q05431	1	1	CID		62.0083	4.49211	1	1	1.23076e+06	2	1140.52	2280.03	-15.6246	86.7303	31227	31227	MS2	20/57	R_Col_0_1.raw
	QMGLSDKDIVALSGAHTLGR	Q05431	1	1	CID		15.925	4.45092	1	1	9079826	3	690.758	2070.26	568.629	49.8341	16796	16796	MS2	32/114	R_Col_0_1.raw
	SGFEGAWTSNPLIFDNSYFK	Q05431	1	1	CID		86.0113	4.44302	1	1	1997455	2	1141.02	2281.03	422.79	88.1025	31761	31761	MS2	24/57	R_Col_0_1.raw
	FDAEQAHGANSGIHIALR	Q05431	1	1	CID		58.6812	4.35591	1	1	1.48981e+06	3	635.84	1905.5	-759.372	32.5117	9944	9944	MS2	31/102	R_Col_0_1.raw
	SGFEGAWTSNPLIFDNSYFK	Q05431	1	1	CID		32.0958	4.14696	1	1	829267	2	1140.6	2280.19	57.4712	86.4962	31136	31136	MS2	17/57	R_Col_0_1.raw
	SGFEGAWTSNPLIFDNSYFK	Q05431	1	1	CID		71.1849	3.73795	1	1	1.96122e+06	3	760.926	2280.76	307.498	87.4525	31508	31508	MS2	34/114	R_Col_0_1.raw
	QMGLSDKDIVALSGAHTLGR	Q05431	1	1	CID		32.374	3.73411	1	1	3.54769e+06	3	689.924	2067.76	-639.746	49.8871	16817	16817	MS2	33/114	R_Col_0_1.raw
	ALLDDPVFRPLVEK	Q05431	1	1	CID		40.2048	3.73107	1	1	1.03363e+06	2	806.926	1612.85	579.786	62.6634	21850	21850	MS2	20/39	R_Col_0_1.raw
	YAADEDAFFADYAEAHMK	Q05431	1	1	CID		100.181	3.64153	1	1	2374872	2	1032.93	2064.85	-4.8734	61.5298	21404	21404	MS2	24/51	R_Col_0_1.raw
	ALLDDPVFRPLVEK	Q05431	1	1	CID		39.2516	3.55712	1	1	978565	2	807.01	1613.01	683.054	64.1337	22425	22425	MS2	21/39	R_Col_0_1.raw
	LAWHSAGTFDcQSR	Q05431	1	1	CID	C11(Carbamidomethyl)	41.3194	3.50335	1	1	6.8114e+06	2	818.343	1635.68	-32.937	29.0849	8588	8588	MS2	21/39	R_Col_0_1.raw
	ALLDDPVFRPLVEK	Q05431	1	1	CID		43.118	3.43663	1	1	883333	2	806.343	1611.68	-143.691	62.6701	21853	21853	MS2	18/39	R_Col_0_1.raw
	QMGLSDKDIVALSGAHTLGR	Q05431	1	1	CID		58.3963	3.34205	1	1	910662	2	1034.85	2068.69	-190.022	49.5437	16683	16683	MS2	15/57	R_Col_0_1.raw
	EGLLQLVSDK	Q05431	1	1	CID		37.0228	2.95644	1	1	1.875e+06	1	1101.52	1101.52	-90.3927	55.4321	19006	19006	MS2	18/27	R_Col_0_1.raw
P47998	45.03	15	322	33.7837	6.13818	130.908	Cysteine synthase 1 OS=Arabidopsis thaliana GN=OASA1 PE=1 SV=2 - [CYSK1_ARATH]
	Sequence	Protein Accessions	# Proteins	# Protein Groups	Activation Type	Modifications	Probability	XCorr	Δ Score	Rank	Intensity	Charge	m/z [Da]	MH+ [Da]	ΔM [ppm]	RT [min]	First Scan	Last Scan	MS Order	Ions Matched	Spectrum File	Annotation
	GLIKPGESVLIEPTSGNTGVGLAFTAAAK	P47998	2	1	CID		40.9995	5.34829	1	1	1.52314e+06	3	933.929	2799.77	443.693	70.572	24921	24921	MS2	36/168	R_Col_0_1.raw
	TPNGYMLQQFENPANPK	P47998	2	1	CID		73.9117	5.28607	1	1	2797092	2	975.346	1949.69	391.48	53.172	18112	18112	MS2	21/48	R_Col_0_1.raw
	DVTELIGNTPLVYLNNVAEGcVGR	P47998	1	1	CID	C21(Carbamidomethyl)	65.3573	5.18259	1	1	953582	2	1302.52	2604.03	275.729	98.374	35774	35774	MS2	26/69	R_Col_0_1.raw
	TPNGYMLQQFENPANPK	P47998	2	1	CID		26.0082	4.63294	1	1	4.07652e+06	2	975.513	1950.02	562.355	52.9016	18007	18007	MS2	20/48	R_Col_0_1.raw
	EGLLVGISSGAAAAAAIK	P47998	2	1	CID		27.6247	3.8732	1	2	15027.3	2	800.01	1599.01	63.0163	128.122	45794	45794	MS2	19/51	R_Col_0_1.raw
	IDGFVSGIGTGGTITGAGK	P47998	1	1	CID		2.43859	3.81779	1	1	4876680	2	855.011	1709.01	657.046	53.4408	18218	18218	MS2	25/54	R_Col_0_1.raw
	EGLLVGISSGAAAAAAIK	P47998	2	1	CID		1	3.71862	1	2	24934.7	2	800.51	1600.01	687.984	108.303	39415	39415	MS2	18/51	R_Col_0_1.raw
	GLIKPGESVLIEPTSGNTGVGLAFTAAAK	P47998	2	1	CID		1	3.67797	1	1	1.65477e+06	3	933.512	2798.52	-2.78205	69.1066	24351	24351	MS2	30/168	R_Col_0_1.raw
	DVTELIGNTPLVYLNNVAEGcVGR	P47998	1	1	CID	C21(Carbamidomethyl)	42.7532	3.6555	1	1	3.73449e+06	3	868.844	2604.52	462.641	98.0067	35630	35630	MS2	29/138	R_Col_0_1.raw
	EGLLVGISSGAAAAAAIK	P47998	2	1	CID		18.0957	3.64046	1	2	15298.6	2	800.426	1599.85	583.877	124.422	44599	44599	MS2	21/51	R_Col_0_1.raw
	LYGVEPVESAILSGGKPGPHK	P47998	1	1	CID		64.5054	3.63503	1	1	1.35469e+06	2	1068.51	2136.02	408.619	50.2715	16968	16968	MS2	22/60	R_Col_0_1.raw
	IHYETTGPEIWK	P47998	2	1	CID		18.8887	3.3851	1	1	3.44772e+06	2	737.842	1474.68	636.767	35.508	11126	11126	MS2	18/33	R_Col_0_1.raw
	EGLLVGISSGAAAAAAIK	P47998	2	1	CID		1	3.17915	1	2	8332.36	2	799.593	1598.18	-458.388	132.782	47307	47307	MS2	18/51	R_Col_0_1.raw
	EGLLVGISSGAAAAAAIK	P47998	2	1	CID		1	3.16798	1	2	14409.5	2	800.676	1600.35	896.133	114.688	41473	41473	MS2	24/51	R_Col_0_1.raw
	GTGGKIDGFVSGIGTGGTITGAGK	P47998	1	1	CID		1	3.09277		2	1.51379e+06	2	1054.76	2108.52	200.884	46.8034	15600	15600	MS2	16/69	R_Col_0_1.raw
Q9FFR3	27.31	8	487	53.2842	5.79541	130.219	6-phosphogluconate dehydrogenase, decarboxylating 2, chloroplastic OS=Arabidopsis thaliana GN=At5g41670 PE=1 SV=1 - [6PGD2_ARATH]
	Sequence	Protein Accessions	# Proteins	# Protein Groups	Activation Type	Modifications	Probability	XCorr	Δ Score	Rank	Intensity	Charge	m/z [Da]	MH+ [Da]	ΔM [ppm]	RT [min]	First Scan	Last Scan	MS Order	Ions Matched	Spectrum File	Annotation
	IGLAGLAVMGQNLALNIADK	Q9FFR3	1	1	CID		89.7816	5.38255	1	1	1.44808e+06	2	992.18	1983.35	626.414	92.9486	33651	33651	MS2	25/57	R_Col_0_1.raw
	VAAQVEDGPcVTYIGEGGSGNFVK	Q9FFR3;Q9SH69	2	2	CID	C10(Carbamidomethyl)	94.3694	5.07582	1	1	954133	2	1228.02	2455.03	353.534	54.5178	18644	18644	MS2	24/69	R_Col_0_1.raw
	GELESFLVEITSDIFR	Q9FFR3	1	1	CID		72.7732	5.01217	1	1	31600.2	2	928.429	1855.85	485.979	111.668	40497	40497	MS2	24/45	R_Col_0_1.raw
	MVHNGIEYGDMQLISEAYDVLK	Q9FFR3;Q9SH69	2	2	CID		64.8873	4.63807	0.324109	1	774713	2	1263.1	2525.2	-3.38029	83.0579	29795	29795	MS2	28/63	R_Col_0_1.raw
	IGLAGLAVMGQNLALNIADKGFPISVYNR	Q9FFR3	1	1	CID		1	4.0471	1	1	852871	3	1006.35	3017.03	457.885	100.49	36604	36604	MS2	30/168	R_Col_0_1.raw
	NVGGLSNDELAEIFTEWNR	Q9FFR3	1	1	CID		52.5753	3.58574	1	1	1.27427e+06	2	1082.02	2163.02	-465.861	90.0039	32502	32502	MS2	19/54	R_Col_0_1.raw
	IcSYAQGMNLLR	Q9FFR3;Q9SH69	2	2	CID	C2(Carbamidomethyl)	51.3502	3.49282	1	1	9462524	2	713.425	1425.84	101.185	49.3346	16598	16598	MS2	18/33	R_Col_0_1.raw
	GWDLNLGEMAR	Q9FFR3	1	1	CID		44.5077	3.08997	1	1	431379	2	631.59	1262.17	453.786	63.0795	22013	22013	MS2	17/30	R_Col_0_1.raw
Q9ZVF3	41.06	13	151	17.5015	5.73193	129.851	MLP-like protein 328 OS=Arabidopsis thaliana GN=MLP328 PE=2 SV=1 - [ML328_ARATH]
	Sequence	Protein Accessions	# Proteins	# Protein Groups	Activation Type	Modifications	Probability	XCorr	Δ Score	Rank	Intensity	Charge	m/z [Da]	MH+ [Da]	ΔM [ppm]	RT [min]	First Scan	Last Scan	MS Order	Ions Matched	Spectrum File	Annotation
	VYDVIFQFIQK	Q9ZVF3	1	1	CID		26.8529	4.55944	1	1	5.76339e+06	2	700.424	1399.84	56.7814	79.745	28502	28502	MS2	21/30	R_Col_0_1.raw
	IWNYTcDGKPEVFK	Q9ZVF2;Q9ZVF3	2	2	CID	C6(Carbamidomethyl)	56.9246	4.41585	1	1	4.4521e+06	2	879.428	1757.85	575.752	42.8184	14026	14026	MS2	19/39	R_Col_0_1.raw
	IWNYTcDGKPEVFK	Q9ZVF2;Q9ZVF3	2	2	CID	C6(Carbamidomethyl)	84.0335	4.26489	1	1	2.19307e+06	2	878.511	1756.02	-467.697	41.4596	13488	13488	MS2	21/39	R_Col_0_1.raw
	VYDVIFQFIQK	Q9ZVF3	1	1	CID		15.4098	4.15594	1	1	2.40546e+06	2	700.841	1400.67	651.71	81.2719	29097	29097	MS2	20/30	R_Col_0_1.raw
	VYDVIFQFIQK	Q9ZVF3	1	1	CID		29.2426	4.01727	1	1	587180	3	467.67	1401	880.17	80.2289	28691	28691	MS2	31/60	R_Col_0_1.raw
	IWNYTcDGKPEVFK	Q9ZVF2;Q9ZVF3	2	2	CID	C6(Carbamidomethyl)	62.4964	3.98103	1	1	3.33544e+06	2	878.928	1756.85	6.86792	43.0067	14101	14101	MS2	17/39	R_Col_0_1.raw
	SLAADMDDHVLKA	Q9ZVF3	1	1	CID		57.9902	3.89379	1	1	16333253	2	693.424	1385.84	121.409	36.6328	11576	11576	MS2	24/36	R_Col_0_1.raw
	IWNYTcDGKPEVFK	Q9ZVF2;Q9ZVF3	2	2	CID	C6(Carbamidomethyl)	65.6835	3.82506	1	1	3.16313e+06	2	879.428	1757.85	575.752	41.2393	13401	13401	MS2	17/39	R_Col_0_1.raw
	VYDVIFQFIQK	Q9ZVF3	1	1	CID		37.3103	3.74725	1	1	1.98057e+06	2	700.424	1399.84	56.7814	82.0127	29386	29386	MS2	18/30	R_Col_0_1.raw
	GLEGHVMEQLK	Q9ZVF2;Q9ZVF3	2	2	CID		31.862	3.42469	1	1	28963172	2	620.84	1240.67	29.2581	28.4086	8318	8318	MS2	18/30	R_Col_0_1.raw
	REIDDENMAVTFR	Q9ZVF3	1	1	CID		93.504	3.26006	1	1	1.2427e+06	2	797.676	1594.35	-879.993	34.984	10922	10922	MS2	23/36	R_Col_0_1.raw
	VYDVIFQFIQK	Q9ZVF3	1	1	CID		1.53082	3.07079	1	1	15861.2	2	700.258	1399.51	-181.389	124.271	44550	44550	MS2	18/30	R_Col_0_1.raw
	GLEGHVMEQLK	Q9ZVF2;Q9ZVF3	2	2	CID		22.1584	2.65068	1	1	1.439e+06	1	1240.6	1240.6	-27.3863	27.5798	7991	7991	MS2	17/30	R_Col_0_1.raw
Q9FK25	20.39	8	363	39.5921	5.94775	129.431	Flavone 3'-O-methyltransferase 1 OS=Arabidopsis thaliana GN=OMT1 PE=1 SV=1 - [OMT1_ARATH]
	Sequence	Protein Accessions	# Proteins	# Protein Groups	Activation Type	Modifications	Probability	XCorr	Δ Score	Rank	Intensity	Charge	m/z [Da]	MH+ [Da]	ΔM [ppm]	RT [min]	First Scan	Last Scan	MS Order	Ions Matched	Spectrum File	Annotation
	SALELDLLEIMAK	Q9FK25	1	1	CID		48.0247	4.77793	1	1	1.26334e+06	2	723.175	1445.34	-311.106	89.3044	32230	32230	MS2	25/36	R_Col_0_1.raw
	VVcDAFGVNLIELLK	Q9FK25	1	1	CID	C3(Carbamidomethyl)	53.2909	4.37655	1	1	1.098e+06	2	846.094	1691.18	742.688	93.7134	33950	33950	MS2	21/42	R_Col_0_1.raw
	GFEGLTSLVDVGGGIGATLK	Q9FK25	1	1	CID		18.6567	4.02761	1	1	1.13448e+06	2	946.429	1891.85	440.749	86.9305	31306	31306	MS2	18/57	R_Col_0_1.raw
	SALELDLLEIMAK	Q9FK25	1	1	CID		29.8149	3.81773	1	1	849751	2	723.342	1445.68	-80.4574	90.9736	32880	32880	MS2	17/36	R_Col_0_1.raw
	VVcDAFGVNLIELLK	Q9FK25	1	1	CID	C3(Carbamidomethyl)	31.7859	3.65168	1	1	961518	2	845.594	1690.18	151.463	92.3081	33401	33401	MS2	20/42	R_Col_0_1.raw
	LLTSYSVLTcSNR	Q9FK25	1	1	CID	C10(Carbamidomethyl)	34.677	3.59757	1	1	3.25559e+06	2	757.342	1513.68	-60.0287	45.6993	15163	15163	MS2	18/36	R_Col_0_1.raw
	WIcHDWSDEHcVK	Q9FK25	1	1	CID	C3(Carbamidomethyl) C11(Carbamidomethyl)	29.0552	3.18603	1	1	1.28631e+06	2	886.428	1771.85	66.1129	25.6619	7228	7228	MS2	15/36	R_Col_0_1.raw
	GFEGLTSLVDVGGGIGATLK	Q9FK25	1	1	CID		3.20031	3.09267	1	1	32118.9	2	946.513	1892.02	528.801	133.269	47464	47464	MS2	17/57	R_Col_0_1.raw
Q9LFW1	33.33	10	360	40.8635	6.12549	129.112	UDP-arabinopyranose mutase 2 OS=Arabidopsis thaliana GN=RGP2 PE=1 SV=1 - [RGP2_ARATH]
	Sequence	Protein Accessions	# Proteins	# Protein Groups	Activation Type	Modifications	Probability	XCorr	Δ Score	Rank	Intensity	Charge	m/z [Da]	MH+ [Da]	ΔM [ppm]	RT [min]	First Scan	Last Scan	MS Order	Ions Matched	Spectrum File	Annotation
	EGVSTAVSHGLWLNIPDYDAPTQLVKPK	Q9LFW1;Q9SRT9	2	2	CID		69.9569	5.06079	1	1	1.69092e+06	3	1012.51	3035.53	-18.7782	71.3333	25220	25220	MS2	33/162	R_Col_0_1.raw
	GIFWQEEIIPFFQNAK	Q9LFW1	1	1	CID		49.76	4.40486	1	1	1833409	2	984.68	1968.35	683.968	94.1963	34138	34138	MS2	22/45	R_Col_0_1.raw
	GTLFPMcGMNLAFDR	Q9LFW1;Q9SRT9	3	2	CID	C7(Carbamidomethyl)	73.8495	4.20548	1	1	2963625	2	865.428	1729.85	35.8087	79.7472	28503	28503	MS2	20/42	R_Col_0_1.raw
	EAVTVQQcYIELSK	Q9LFW1	1	1	CID	C8(Carbamidomethyl)	72.3592	4.10171	1	1	7091399	2	834.427	1667.85	9.45799	47.7879	15989	15989	MS2	19/39	R_Col_0_1.raw
	GIFWQEEIIPFFQNAK	Q9LFW1	1	1	CID		89.0629	3.9863	1	1	1.77109e+06	2	984.013	1967.02	6.57418	94.3385	34194	34194	MS2	21/45	R_Col_0_1.raw
	YIFTIDDDcFVAK	Q9LFW1;Q9SRT9	2	2	CID	C9(Carbamidomethyl)	17.3434	3.87205	1	1	3.43329e+06	2	804.426	1607.85	683.98	69.413	24471	24471	MS2	14/36	R_Col_0_1.raw
	NLLcPSSPFFFNTLYDPYR	Q9LFW1	1	1	CID	C4(Carbamidomethyl)	95.0101	3.81447	1	1	778369	2	1176.1	2351.19	32.6195	92.1903	33356	33356	MS2	21/54	R_Col_0_1.raw
	YVDAVMTIPK	Q9LFW1;Q9SRT9	4	2	CID		48.2977	3.50117	1	1	4649797	2	569.339	1137.67	938.539	41.3175	13431	13431	MS2	17/27	R_Col_0_1.raw
	YIFTIDDDcFVAKDPSGK	Q9LFW1;Q9SRT9	2	2	CID	C9(Carbamidomethyl)	60.549	3.49524	1	1	1.32583e+06	2	1046.01	2091.02	22.7429	60.6627	21063	21063	MS2	18/51	R_Col_0_1.raw
	YVDAVMTIPK	Q9LFW1;Q9SRT9	4	2	CID		18.4369	3.08968	1	1	5291868	2	569.422	1137.84	1084.88	42.6784	13970	13970	MS2	15/27	R_Col_0_1.raw
P29515	21.6	9	449	50.714	4.83057	129.082	Tubulin beta-7 chain OS=Arabidopsis thaliana GN=TUBB7 PE=2 SV=1 - [TBB7_ARATH]
	Sequence	Protein Accessions	# Proteins	# Protein Groups	Activation Type	Modifications	Probability	XCorr	Δ Score	Rank	Intensity	Charge	m/z [Da]	MH+ [Da]	ΔM [ppm]	RT [min]	First Scan	Last Scan	MS Order	Ions Matched	Spectrum File	Annotation
	GHYTEGAELIDSVLDVVR	P29516;Q56YW9;P29517;P29515	5	4	CID		107.678	5.80899	1	1	1.3577e+06	2	987.513	1974.02	517.617	82.2873	29493	29493	MS2	27/51	R_Col_0_1.raw
	GHYTEGAELIDSVLDVVR	P29516;Q56YW9;P29517;P29515	5	4	CID		132.918	4.69044	1	1	1.39408e+06	2	986.847	1972.69	-157.943	82.4332	29550	29550	MS2	25/51	R_Col_0_1.raw
	EILHIQGGQcGNQIGSK	P29513;P29514;P29515	3	3	CID	C10(Carbamidomethyl)	33.1297	4.21119	1	1	1.03842e+06	2	920.512	1840.02	597.218	27.0294	7773	7773	MS2	21/48	R_Col_0_1.raw
	SGPYGQIFRPDNFVFGQSGAGNNWAK	P29516;P29515;P12411	3	3	CID		24.1819	4.09887	1	1	905353	3	939.096	2815.27	331.804	71.324	25216	25216	MS2	29/150	R_Col_0_1.raw
	GHYTEGAELIDSVLDVVR	P29516;Q56YW9;P29517;P29515	5	4	CID		26.1945	3.89215	1	1	1.79182e+06	3	658.424	1973.26	131.109	82.2019	29460	29460	MS2	35/102	R_Col_0_1.raw
	VSEQFTAMFR	P29516;Q56YW9;P29513;P29514;P29517;P29515;P12411	8	7	CID		50.4426	3.53256	1	1	5.45071e+06	2	608.339	1215.67	72.8701	50.568	17084	17084	MS2	18/27	R_Col_0_1.raw
	EILHIQGGQcGNQIGSK	P29513;P29514;P29515	3	3	CID	C10(Carbamidomethyl)	18.7222	3.51603	1	1	1.08901e+06	2	920.095	1839.18	144.38	27.1264	7811	7811	MS2	20/48	R_Col_0_1.raw
	NSSYFVEWIPNNVK	P29516;Q56YW9;P29513;P29514;P29517;P29515;P12411	8	7	CID		8.60537	3.4125	1	1	4.08286e+06	2	849.511	1698.01	695.506	68.3614	24058	24058	MS2	17/39	R_Col_0_1.raw
	MMMTFSVFPSPK	P29517;P29515	3	2	CID		30.2593	3.40294	1	1	2.70199e+06	2	702.424	1403.84	843.95	69.9273	24671	24671	MS2	18/33	R_Col_0_1.raw
Q9XEE2	36.28	10	317	36.2436	6.1001	128.913	Annexin D2 OS=Arabidopsis thaliana GN=ANN2 PE=1 SV=1 - [ANXD2_ARATH]
	Sequence	Protein Accessions	# Proteins	# Protein Groups	Activation Type	Modifications	Probability	XCorr	Δ Score	Rank	Intensity	Charge	m/z [Da]	MH+ [Da]	ΔM [ppm]	RT [min]	First Scan	Last Scan	MS Order	Ions Matched	Spectrum File	Annotation
	DTSGDYEDMLVALLGHGDA	Q9XEE2	1	1	CID		87.299	5.31257	1	1	2136189	2	989.93	1978.85	-8.70012	97.7767	35540	35540	MS2	22/54	R_Col_0_1.raw
	AQLGATLNHYNNEYGNAINK	Q9XEE2	1	1	CID		88.5016	5.00361	1	1	1676086	2	1103.02	2205.02	-20.2243	36.9346	11697	11697	MS2	23/57	R_Col_0_1.raw
	NNWVLVEIAcTRPALELIK	Q9XEE2	1	1	CID	C10(Carbamidomethyl)	47.7674	4.83213	1	1	744127	2	1120.43	2239.86	281.691	83.9043	30124	30124	MS2	26/54	R_Col_0_1.raw
	NNWVLVEIAcTRPALELIK	Q9XEE2	1	1	CID	C10(Carbamidomethyl)	50.255	4.69422	1	1	1.04216e+06	2	1120.68	2240.36	504.811	83.6599	30030	30030	MS2	23/54	R_Col_0_1.raw
	NNWVLVEIAcTRPALELIK	Q9XEE2	1	1	CID	C10(Carbamidomethyl)	78.2678	4.16998	1	1	989096	2	1119.6	2238.19	-462.763	84.1098	30205	30205	MS2	22/54	R_Col_0_1.raw
	DTSGDYEDMLVALLGHGDA	Q9XEE2	1	1	CID		77.5843	4.09937	1	1	901595	2	989.597	1978.19	-345.719	97.9313	35601	35601	MS2	20/54	R_Col_0_1.raw
	VPSNVPLPEDDAEQLHK	Q9XEE2	1	1	CID		22.9413	3.60975	1	1	7860622	3	630.34	1889	561.059	36.8146	11648	11648	MS2	32/96	R_Col_0_1.raw
	SIEEDVAQHTSGDLR	Q9XEE2	1	1	CID		65.9523	3.58852	1	1	2.81445e+06	2	828.927	1656.85	38.6733	33.3768	10289	10289	MS2	21/42	R_Col_0_1.raw
	SVYAATYNEDLLK	Q9XEE2	1	1	CID		1.46248	3.45791	1	1	11073964	2	743.925	1486.84	67.7863	46.1863	15356	15356	MS2	19/36	R_Col_0_1.raw
	AVMLWTLDPPER	Q9XEE2	1	1	CID		34.0591	3.19034	1	1	49766.3	2	714.758	1428.51	541.499	66.0097	23163	23163	MS2	18/33	R_Col_0_1.raw
P42643	37.83	10	267	29.9129	4.80518	128.358	14-3-3-like protein GF14 chi OS=Arabidopsis thaliana GN=GRF1 PE=1 SV=3 - [14331_ARATH]
	Sequence	Protein Accessions	# Proteins	# Protein Groups	Activation Type	Modifications	Probability	XCorr	Δ Score	Rank	Intensity	Charge	m/z [Da]	MH+ [Da]	ΔM [ppm]	RT [min]	First Scan	Last Scan	MS Order	Ions Matched	Spectrum File	Annotation
	DNLTLWTSDMQDDVADDIKEAAPAAAKPADEQQS	P42643	1	1	CID		65.7588	5.38581	1	1	946048	3	1220.68	3660.04	101.998	82.3019	29499	29499	MS2	33/198	R_Col_0_1.raw
	SKIETELSDIcDGILK	P42643	1	1	CID	C11(Carbamidomethyl)	20.704	4.64331	1	1	1.25241e+06	3	607.756	1821.25	176.916	62.9481	21961	21961	MS2	31/90	R_Col_0_1.raw
	SKIETELSDIcDGILK	P42643	1	1	CID	C11(Carbamidomethyl)	61.343	4.59296	1	1	789909	2	911.345	1821.68	412.774	63.6722	22244	22244	MS2	25/45	R_Col_0_1.raw
	SKIETELSDIcDGILK	P42643	1	1	CID	C11(Carbamidomethyl)	54.9938	4.54043	1	1	682320	2	910.845	1820.68	-136.254	63.691	22252	22252	MS2	24/45	R_Col_0_1.raw
	QAFDEAIAELDTLGEESYKDSTLIMQLLR	P42643;Q01525;P46077	3	3	CID		10.5702	4.15859	1	1	29311.2	3	1100.43	3299.28	-107.123	111.36	40398	40398	MS2	25/168	R_Col_0_1.raw
	QAFDEAIAELDTLGEESYK	P42643;Q01525;P46077	3	3	CID		32.629	4.09432	1	1	1.47911e+06	2	1065.51	2130.02	483.635	85.3764	30699	30699	MS2	19/54	R_Col_0_1.raw
	DNLTLWTSDMQDDVADDIK	P42643	1	1	CID		37.9929	3.74251	1	1	926353	2	1098.1	2195.19	95.3363	80.4542	28779	28779	MS2	18/54	R_Col_0_1.raw
	YEEMVEFMEK	P42644;P42645;P42643;Q01525;P46077;Q96300	7	6	CID		29.7453	3.31477	1	1	16441210	2	667.84	1334.67	81.8536	50.7045	17138	17138	MS2	19/27	R_Col_0_1.raw
	AVDKDELTVEER	P42643	1	1	CID		15.221	3.17024	1	1	0	2	703.078	1405.15	1030.32	20.6129	5217	5217	MS2	18/33	R_Col_0_1.raw
	SKIETELSDICDGILK	P42643	1	1	CID		1	3.07467	1	1	1483109	2	882.595	1764.18	154.346	76.5256	27246	27246	MS2	17/45	R_Col_0_1.raw
Q56ZI2	18.16	8	683	75.9616	4.91943	128.026	Patellin-2 OS=Arabidopsis thaliana GN=PATL2 PE=1 SV=2 - [PATL2_ARATH]
	Sequence	Protein Accessions	# Proteins	# Protein Groups	Activation Type	Modifications	Probability	XCorr	Δ Score	Rank	Intensity	Charge	m/z [Da]	MH+ [Da]	ΔM [ppm]	RT [min]	First Scan	Last Scan	MS Order	Ions Matched	Spectrum File	Annotation
	DSPFTVEDGVTEAVVK	Q56ZI2	1	1	CID		80.3402	4.19024	1	1	3722621	2	846.927	1692.85	8.53711	61.7965	21508	21508	MS2	22/45	R_Col_0_1.raw
	IDDLVSEDLEGSEFEK	Q56ZI2	1	1	CID		72.0449	3.91279	1	1	1788406	2	913.512	1826.02	645.018	60.6236	21048	21048	MS2	23/45	R_Col_0_1.raw
	VVSEVAVPETEVTAVKEEEVATGK	Q56ZI2	1	1	CID		8.32232	3.68978	1	1	858888	2	1250.77	2500.53	90.5849	49.8244	16794	16794	MS2	19/69	R_Col_0_1.raw
	KEEILAAPAPIVAETK	Q56ZI2	1	1	CID		19.6071	3.35715	1	1	2578159	2	840.51	1680.01	33.1667	40.4962	13108	13108	MS2	19/45	R_Col_0_1.raw
	YTIDLPATEGSTLSWELR	Q56ZI2	1	1	CID		39.6816	3.32694	1	1	811432	2	1027.01	2053.02	483.363	79.111	28255	28255	MS2	20/51	R_Col_0_1.raw
	KEETPVAPAPVETKPAAPVVAETK	Q56ZI2	1	1	CID		1	3.3089	1	1	1.1862e+06	2	1230.6	2460.2	347.967	29.6687	8820	8820	MS2	15/69	R_Col_0_1.raw
	YVAPEVVPVK	Q56ZI2	1	1	CID		18.2064	3.249	1	1	1.16062e+06	1	1100.6	1100.6	-32.9396	33.9901	10529	10529	MS2	17/27	R_Col_0_1.raw
	DSPFTVEDGVTEAVVK	Q56ZI2	1	1	CID		33.3941	3.12472	1	1	2.34275e+06	2	847.427	1693.85	598.915	61.434	21366	21366	MS2	20/45	R_Col_0_1.raw
P92947-2	27.37	11	486	52.4691	7.44482	127.731	Isoform MDAR6 of Monodehydroascorbate reductase, chloroplastic/mitochondrial OS=Arabidopsis thaliana GN=MDAR5 - [MDAR_ARATH]
	Sequence	Protein Accessions	# Proteins	# Protein Groups	Activation Type	Modifications	Probability	XCorr	Δ Score	Rank	Intensity	Charge	m/z [Da]	MH+ [Da]	ΔM [ppm]	RT [min]	First Scan	Last Scan	MS Order	Ions Matched	Spectrum File	Annotation
	SLLTAHTDTYDYLPYFYSR	P92947-2	2	1	CID		48.8075	4.4778	1	1	868366	2	1164.1	2327.19	468.438	72.3049	25600	25600	MS2	22/54	R_Col_0_1.raw
	GIEVIYEDPVAGADFEK	P92947-2	2	1	CID		95.7504	4.21649	1	1	27657.3	2	926.762	1852.52	332.406	66.95	23515	23515	MS2	24/48	R_Col_0_1.raw
	IATFWIESGR	P92947-2	2	1	CID		13.0216	3.69829	1	1	4532562	2	590.339	1179.67	46.5213	54.4932	18633	18633	MS2	17/27	R_Col_0_1.raw
	EFVIVGGGNAAGYAAR	P92947-2	2	1	CID		1	3.61473	1	1	4270250	2	776.426	1551.84	34.1431	47.1551	15738	15738	MS2	20/45	R_Col_0_1.raw
	SIGGIQVDGLFR	P92947-2	2	1	CID		28.2118	3.49346	1	1	618835	2	631.84	1262.67	777.91	64.504	22569	22569	MS2	18/33	R_Col_0_1.raw
	YGSLIIATGcTASR	P92947-2	2	1	CID	C10(Carbamidomethyl)	1	3.4574	1	1	5602923	2	735.508	1470.01	182.192	38.5967	12354	12354	MS2	18/39	R_Col_0_1.raw
	IATFWIESGR	P92947-2	2	1	CID		57.2117	3.3674	1	1	1.12499e+06	2	590.589	1180.17	470.177	54.1346	18490	18490	MS2	17/27	R_Col_0_1.raw
	EVADADSLIASLGK	P92947-2	2	1	CID		39.5563	3.32672	1	1	1.11882e+06	2	695.424	1389.84	801.906	63.2591	22083	22083	MS2	17/39	R_Col_0_1.raw
	GASINNLEAGSDGR	P92947-2	2	1	CID		49.8439	3.30992	1	1	1575399	2	681.341	1361.67	755.629	22.1737	5837	5837	MS2	19/39	R_Col_0_1.raw
	SIGGIQVDGLFR	P92947-2	2	1	CID		16.1643	3.26662	1	1	872528	2	631.34	1261.67	-14.0878	65.1417	22821	22821	MS2	20/33	R_Col_0_1.raw
	GVLVESGSPEEFQLLPK	P92947-2	2	1	CID		14.647	3.12759	1	1	3.17585e+06	2	915.012	1829.02	25.8677	67.9015	23877	23877	MS2	18/48	R_Col_0_1.raw
P49688	25.96	7	285	30.8593	10.2866	127.384	40S ribosomal protein S2-3 OS=Arabidopsis thaliana GN=RPS2C PE=1 SV=2 - [RS23_ARATH]
	Sequence	Protein Accessions	# Proteins	# Protein Groups	Activation Type	Modifications	Probability	XCorr	Δ Score	Rank	Intensity	Charge	m/z [Da]	MH+ [Da]	ΔM [ppm]	RT [min]	First Scan	Last Scan	MS Order	Ions Matched	Spectrum File	Annotation
	VLQFAGIDDVFTSSR	P49688	4	1	CID		83.6791	5.10081	1	1	4541776	2	828.427	1655.85	605.676	74.7196	26540	26540	MS2	25/42	R_Col_0_1.raw
	QIEQIYLHSLPVK	P49688	1	1	CID		27.9286	4.07241	1	1	3.12428e+06	2	784.926	1568.84	612.243	46.7368	15573	15573	MS2	18/36	R_Col_0_1.raw
	VLQFAGIDDVFTSSR	P49688	4	1	CID		30.6457	3.89072	1	1	2213312	2	827.927	1654.85	1.74459	75.422	26816	26816	MS2	20/42	R_Col_0_1.raw
	SPYQEHTDFLASK	P49688	1	1	CID		54.9052	3.7419	1	1	2.14849e+06	2	761.842	1522.68	-26.2931	26.1725	7432	7432	MS2	21/36	R_Col_0_1.raw
	KVLQFAGIDDVFTSSR	P49688	4	1	CID		48.5388	3.71902	1	1	1.50109e+06	2	891.595	1782.18	-424.36	61.8988	21549	21549	MS2	19/45	R_Col_0_1.raw
	AFVVVGDGNGHVGLGVK	P49688	3	1	CID		32.1136	3.68237	1	1	2.51099e+06	2	813.427	1625.85	593.695	45.7909	15199	15199	MS2	22/48	R_Col_0_1.raw
	ALSTSKPDPVVEDQA	P49688	1	1	CID		63.3475	3.34737	1	1	1.5463e+06	2	778.343	1555.68	-708.648	25.9338	7336	7336	MS2	21/42	R_Col_0_1.raw
Q9SRT9	39.5	11	357	40.6025	5.92236	127.275	UDP-arabinopyranose mutase 1 OS=Arabidopsis thaliana GN=RGP1 PE=1 SV=1 - [RGP1_ARATH]
	Sequence	Protein Accessions	# Proteins	# Protein Groups	Activation Type	Modifications	Probability	XCorr	Δ Score	Rank	Intensity	Charge	m/z [Da]	MH+ [Da]	ΔM [ppm]	RT [min]	First Scan	Last Scan	MS Order	Ions Matched	Spectrum File	Annotation
	EGVSTAVSHGLWLNIPDYDAPTQLVKPK	Q9LFW1;Q9SRT9	2	2	CID		69.9569	5.06079	1	1	1.69092e+06	3	1012.51	3035.53	-18.7782	71.3333	25220	25220	MS2	33/162	R_Col_0_1.raw
	ELIGPAMYFGLMGDGQPIGR	Q9SRT9	2	1	CID		82.1052	4.50433	1	1	2.03144e+06	2	1061.6	2122.19	67.2557	89.9945	32498	32498	MS2	22/57	R_Col_0_1.raw
	GTLFPMcGMNLAFDR	Q9LFW1;Q9SRT9	3	2	CID	C7(Carbamidomethyl)	73.8495	4.20548	1	1	2963625	2	865.428	1729.85	35.8087	79.7472	28503	28503	MS2	20/42	R_Col_0_1.raw
	GIFWQEDIIPFFQSAK	Q9SRT9	1	1	CID		45.164	3.97293	1	1	1.2932e+06	2	963.93	1926.85	452.571	96.2664	34948	34948	MS2	20/45	R_Col_0_1.raw
	YIFTIDDDcFVAK	Q9LFW1;Q9SRT9	2	2	CID	C9(Carbamidomethyl)	17.3434	3.87205	1	1	3.43329e+06	2	804.426	1607.85	683.98	69.413	24471	24471	MS2	14/36	R_Col_0_1.raw
	NLLcPSTPFFFNTLYDPYR	Q9SRT9	1	1	CID	C4(Carbamidomethyl)	56.3946	3.58677	1	1	846930	2	1183.02	2365.03	-44.5468	93.3486	33808	33808	MS2	20/54	R_Col_0_1.raw
	YVDAVMTIPK	Q9LFW1;Q9SRT9	4	2	CID		48.2977	3.50117	1	1	4649797	2	569.339	1137.67	938.539	41.3175	13431	13431	MS2	17/27	R_Col_0_1.raw
	YIFTIDDDcFVAKDPSGK	Q9LFW1;Q9SRT9	2	2	CID	C9(Carbamidomethyl)	60.549	3.49524	1	1	1.32583e+06	2	1046.01	2091.02	22.7429	60.6627	21063	21063	MS2	18/51	R_Col_0_1.raw
	TIAVPEGFDYELYNR	Q9SRT9	1	1	CID		37.2639	3.36126	1	1	1.08974e+06	2	894.595	1788.18	736.888	66.0918	23194	23194	MS2	19/42	R_Col_0_1.raw
	ELIGPAMYFGLMGDGQPIGR	Q9SRT9	2	1	CID		56.8434	3.17649	1	1	712071	2	1062.01	2123.02	459.759	88.6252	31966	31966	MS2	16/57	R_Col_0_1.raw
	YVDAVMTIPK	Q9LFW1;Q9SRT9	4	2	CID		18.4369	3.08968	1	1	5291868	2	569.422	1137.84	1084.88	42.6784	13970	13970	MS2	15/27	R_Col_0_1.raw
Q38946	29.2	10	411	44.6707	6.53662	127.22	Glutamate dehydrogenase 2 OS=Arabidopsis thaliana GN=GDH2 PE=1 SV=1 - [DHE2_ARATH]
	Sequence	Protein Accessions	# Proteins	# Protein Groups	Activation Type	Modifications	Probability	XCorr	Δ Score	Rank	Intensity	Charge	m/z [Da]	MH+ [Da]	ΔM [ppm]	RT [min]	First Scan	Last Scan	MS Order	Ions Matched	Spectrum File	Annotation
	IHDLIGIHTDVPAPDMGTNAQTMAWILDEYSK	Q38946	1	1	CID		116.697	5.37073	1	1	887213	3	1184.6	3551.79	-261.039	84.8013	30475	30475	MS2	34/186	R_Col_0_1.raw
	GVVFATEALLAEYGK	Q38946	1	1	CID		71.8487	4.72188	1	1	2.47579e+06	2	784.509	1568.01	111.45	76.4238	27206	27206	MS2	27/42	R_Col_0_1.raw
	VVAVSDITGAIR	Q38946	1	1	CID		12.1884	4.23507	1	1	4.76206e+06	2	601.422	1201.84	951.031	49.7929	16780	16780	MS2	21/33	R_Col_0_1.raw
	GVVFATEALLAEYGK	Q38946	1	1	CID		38.1034	4.13094	1	1	942867	3	523.338	1568	103.122	77.1025	27474	27474	MS2	32/84	R_Col_0_1.raw
	SIQGLTFVIQGFGNVGTWAAK	Q38946	1	1	CID		29.3296	3.6727	1	1	1.34983e+06	2	1097.02	2193.02	-520.773	93.3751	33818	33818	MS2	16/60	R_Col_0_1.raw
	FIVEAANHPTDPDADEILSK	Q38946	1	1	CID		33.4059	3.58153	1	1	1.52453e+06	2	1091.52	2182.02	-19.7156	49.4475	16644	16644	MS2	18/57	R_Col_0_1.raw
	VVAVSDITGAIR	Q38946	1	1	CID		39.7258	3.50826	1	1	4.39749e+06	2	600.922	1200.84	119.055	49.8824	16815	16815	MS2	19/33	R_Col_0_1.raw
	YHPEVDPDEVNALAQLMTWK	Q38946;Q43314	2	2	CID		57.0909	3.22898	1	1	697690	2	1178.68	2356.36	98.5143	84.3028	30281	30281	MS2	21/57	R_Col_0_1.raw
	GVVFATEALLAEYGK	Q38946	1	1	CID		1	3.19249		2	2154857	2	784.343	1567.68	-101.16	77.9895	27818	27818	MS2	15/42	R_Col_0_1.raw
	VVAVSDITGAIR	Q38946	1	1	CID		1.23735	2.83282	1	1	1.36646e+06	1	1200.77	1200.77	60.5369	48.9973	16467	16467	MS2	16/33	R_Col_0_1.raw
P19456	4.11	2	948	104.335	6.99072	126.978	ATPase 2, plasma membrane-type OS=Arabidopsis thaliana GN=AHA2 PE=1 SV=2 - [PMA2_ARATH]
	Sequence	Protein Accessions	# Proteins	# Protein Groups	Activation Type	Modifications	Probability	XCorr	Δ Score	Rank	Intensity	Charge	m/z [Da]	MH+ [Da]	ΔM [ppm]	RT [min]	First Scan	Last Scan	MS Order	Ions Matched	Spectrum File	Annotation
	KADIGIAVADATDAAR	P19456	7	1	CID		28.1783	3.43356	1	1	1.31083e+06	2	779.843	1558.68	548.375	37.4147	11887	11887	MS2	20/45	R_Col_0_1.raw
	LLEGDPLKVDQSALTGESLPVTK	P19456	2	1	CID		4.07511	3.10461	1	1	596654	2	1205.52	2410.03	-116.148	64.6234	22617	22617	MS2	17/66	R_Col_0_1.raw
O80852	44.65	13	215	24.1305	6.65381	126.691	Glutathione S-transferase F9 OS=Arabidopsis thaliana GN=GSTF9 PE=1 SV=1 - [GSTF9_ARATH]
	Sequence	Protein Accessions	# Proteins	# Protein Groups	Activation Type	Modifications	Probability	XCorr	Δ Score	Rank	Intensity	Charge	m/z [Da]	MH+ [Da]	ΔM [ppm]	RT [min]	First Scan	Last Scan	MS Order	Ions Matched	Spectrum File	Annotation
	YLAGDFVSLADLAHLPFTDYLVGPIGK	O80852	1	1	CID		114.986	6.12001	1	1	956681	3	965.18	2893.52	347.573	103.877	37916	37916	MS2	45/156	R_Col_0_1.raw
	QPAYLALQPFGTVPAVVDGDYK	O80852	2	1	CID		63.65	4.66254	1	1	1.5261e+06	2	1175.68	2350.36	488.142	83.2998	29888	29888	MS2	22/63	R_Col_0_1.raw
	YLAGDFVSLADLAHLPFTDYLVGPIGK	O80852	1	1	CID		49.6367	4.53306	1	1	94066.9	3	964.763	2892.27	-84.4707	104.887	38279	38279	MS2	32/156	R_Col_0_1.raw
	YLAGDFVSLADLAHLPFTDYLVGPIGK	O80852	1	1	CID		300	4.52063	1	1	127541	2	1446.69	2892.37	-51.1406	103.389	37734	37734	MS2	26/78	R_Col_0_1.raw
	HVSAWWDDISSRPAWK	O80852	1	1	CID		72.7627	4.43784	1	1	656489	2	971.013	1941.02	40.3853	54.6366	18691	18691	MS2	20/45	R_Col_0_1.raw
	YLAGDFVSLADLAHLPFTDYLVGPIGK	O80852	1	1	CID		106.557	4.29197	1	1	82638.8	2	1446.94	2892.87	121.71	105.175	38380	38380	MS2	20/78	R_Col_0_1.raw
	GVAFETIPVDLMK	O80852	2	1	CID		54.5093	4.21357	1	1	10609257	2	710.508	1420.01	178.38	73.0096	25874	25874	MS2	23/36	R_Col_0_1.raw
	LAGVLDVYEAHLSK	O80852	2	1	CID		40.6614	4.16405	1	1	4.15017e+06	2	758.009	1515.01	124.791	51.8939	17607	17607	MS2	20/39	R_Col_0_1.raw
	GEHKQPAYLALQPFGTVPAVVDGDYK	O80852	2	1	CID		32.3252	4.07837	1	1	1.74965e+06	3	934.096	2800.27	-56.5416	65.4866	22957	22957	MS2	31/150	R_Col_0_1.raw
	QPAYLALQPFGTVPAVVDGDYK	O80852	2	1	CID		40.7844	4.0684	0.191337	1	1.39676e+06	2	1175.1	2349.19	-8.24966	81.9202	29350	29350	MS2	21/63	R_Col_0_1.raw
	HVSAWWDDISSRPAWK	O80852	1	1	CID		19.0052	3.58917	1	1	1.55e+06	2	971.513	1942.02	555.303	53.8474	18378	18378	MS2	15/45	R_Col_0_1.raw
	QPAYLALQPFGTVPAVVDGDYK	O80852	2	1	CID		2.57152	3.49439	1	1	853632	2	1175.1	2349.19	-8.24966	83.7891	30080	30080	MS2	16/63	R_Col_0_1.raw
	LAGVLDVYEAHLSK	O80852	2	1	CID		65.8415	3.13123	1	1	1.46346e+06	2	757.342	1513.68	-755.974	50.5035	17060	17060	MS2	20/39	R_Col_0_1.raw
Q8W4M5	21.55	11	566	61.4204	6.1001	126.528	Pyrophosphate--fructose 6-phosphate 1-phosphotransferase subunit beta 1 OS=Arabidopsis thaliana GN=PFP-BETA1 PE=1 SV=1 - [PFPB1_ARATH]
	Sequence	Protein Accessions	# Proteins	# Protein Groups	Activation Type	Modifications	Probability	XCorr	Δ Score	Rank	Intensity	Charge	m/z [Da]	MH+ [Da]	ΔM [ppm]	RT [min]	First Scan	Last Scan	MS Order	Ions Matched	Spectrum File	Annotation
	IVEGPASSAAGNPDEIAK	Q8W4M5	1	1	CID		50.6302	4.36839	1	1	2.3105e+06	2	863.428	1725.85	-10.2093	30.2898	9065	9065	MS2	25/51	R_Col_0_1.raw
	IVEGPASSAAGNPDEIAK	Q8W4M5	1	1	CID		91.6154	4.15028	1	1	1.05727e+06	2	863.511	1726.01	86.3551	28.7485	8456	8456	MS2	28/51	R_Col_0_1.raw
	GQFMGQSHFFGYEGR	Q8W4M5	1	1	CID		62.0262	3.87036	1	1	1.81461e+06	2	874.344	1747.68	-47.4995	44.1619	14558	14558	MS2	19/42	R_Col_0_1.raw
	YVELNAEYIQPYR	Q8W4M5	1	1	CID		39.5421	3.77124	0.0841042	1	1015026	2	829.51	1658.01	115.273	54.1389	18492	18492	MS2	17/36	R_Col_0_1.raw
	MLIQMVETELEK	Q8W4M5	2	1	CID		42.3679	3.69873	1	1	3.80284e+06	2	732.508	1464.01	178.245	73.7963	26180	26180	MS2	22/33	R_Col_0_1.raw
	IGVVLSGGQAPGGHNVISGLFDYLQER	Q8W4M5	1	1	CID		45.0354	3.69832	1	1	1.14864e+06	3	928.845	2784.52	385.813	86.2613	31045	31045	MS2	28/156	R_Col_0_1.raw
	MLIQMVETELEK	Q8W4M5	2	1	CID		26.8544	3.59004	1	1	3.30866e+06	2	733.008	1465.01	860.726	73.7528	26163	26163	MS2	19/33	R_Col_0_1.raw
	LFPGLYGQPSVAVVPDQDAPSSAPK	Q8W4M5	1	1	CID		27.7804	3.489	1	1	1.09171e+06	2	1270.52	2540.03	-107.473	68.3249	24044	24044	MS2	22/72	R_Col_0_1.raw
	LFPGLYGQPSVAVVPDQDAPSSAPK	Q8W4M5	1	1	CID		26.4917	3.48715	1	1	1.47622e+06	2	1271.35	2541.7	548.34	68.3225	24043	24043	MS2	18/72	R_Col_0_1.raw
	NQGGFDMIcSGR	Q8W4M5	2	1	CID	C9(Carbamidomethyl)	31.9893	3.25596	1	1	3.73714e+06	2	671.424	1341.84	203.392	35.0979	10966	10966	MS2	16/33	R_Col_0_1.raw
	MLIQMVETELEK	Q8W4M5	2	1	CID		27.5077	3.171	1	1	954952	2	731.758	1462.51	-847.226	73.9862	26255	26255	MS2	18/33	R_Col_0_1.raw
Q9ZP06	46.04	15	341	35.7819	8.35303	125.76	Malate dehydrogenase 1, mitochondrial OS=Arabidopsis thaliana GN=At1g53240 PE=1 SV=1 - [MDHM1_ARATH]
	Sequence	Protein Accessions	# Proteins	# Protein Groups	Activation Type	Modifications	Probability	XCorr	Δ Score	Rank	Intensity	Charge	m/z [Da]	MH+ [Da]	ΔM [ppm]	RT [min]	First Scan	Last Scan	MS Order	Ions Matched	Spectrum File	Annotation
	VAILGAAGGIGQPLALLMK	Q9ZP06	1	1	CID		59.3613	6.08399	1	1	6.20965e+06	2	897.512	1794.02	526.18	89.3454	32246	32246	MS2	30/54	R_Col_0_1.raw
	VAILGAAGGIGQPLALLMK	Q9ZP06	1	1	CID		70.1614	5.40228	1	1	2.42821e+06	2	897.095	1793.18	61.6925	89.9065	32464	32464	MS2	30/54	R_Col_0_1.raw
	LNPLVSSLSLYDIANTPGVAADVGHINTR	Q9ZP06;Q9LKA3	2	2	CID		83.666	5.02378	1	1	545983	2	1504.94	3008.87	428.006	83.9276	30134	30134	MS2	25/84	R_Col_0_1.raw
	NGVEEVLDLGPLSDFEKEGLEALKPELK	Q9ZP06	1	1	CID		42.0576	4.86336	1	1	1.87444e+06	3	1023.93	3069.78	382.272	93.5473	33884	33884	MS2	29/162	R_Col_0_1.raw
	GLNGVPDVIEcSYVQSTITELPFFASK	Q9ZP06	1	1	CID	C11(Carbamidomethyl)	94.7349	4.52146	1	1	717670	2	1486.77	2972.54	357.525	97.8951	35587	35587	MS2	23/78	R_Col_0_1.raw
[truncated: 4,097 more rows]

## Sheet: Col0_2
Accession	Coverage	# Peptides	# AAs	MW [kDa]	calc. pI	Score	Description
O50008	47.45	68	765	84.3035	6.50732	709.114	5-methyltetrahydropteroyltriglutamate--homocysteine methyltransferase 1 OS=Arabidopsis thaliana GN=MS1 PE=1 SV=1 - [METE1_ARATH]
	Sequence	Protein Accessions	# Proteins	# Protein Groups	Activation Type	Modifications	Probability	XCorr	Δ Score	Rank	Intensity	Charge	m/z [Da]	MH+ [Da]	ΔM [ppm]	RT [min]	First Scan	Last Scan	MS Order	Ions Matched	Spectrum File	Annotation
	ALAGQKDEALFSANAAALASR	O50008	1	1	CID		125.686	6.63813	1	1	1.72915e+06	2	1038.01	2075.02	-32.2115	49.726	16655	16655	MS2	29/60	R_Col_0_2.raw
	NIWANDFAASLSTLQALEGIVGK	O50008	1	1	CID		101.244	6.29389	1	1	705205	2	1210.18	2419.36	452.514	106.563	38900	38900	MS2	28/66	R_Col_0_2.raw
	HETcYQIALAIKDEVEDLEK	Q9SRV5;O50008	2	2	CID	C4(Carbamidomethyl)	93.7401	6.15711	1	1	938606	2	1202.68	2404.36	79.3598	75.486	26759	26759	MS2	28/57	R_Col_0_2.raw
	NIWANDFAASLSTLQALEGIVGK	O50008	1	1	CID		105.043	5.99923	1	1	349635	2	1209.68	2418.36	39.1895	107.537	39278	39278	MS2	30/66	R_Col_0_2.raw
	ALAGQKDEALFSANAAALASR	O50008	1	1	CID		99.7803	5.9737	1	1	3.88223e+06	2	1038.51	2076.02	449.504	49.4908	16562	16562	MS2	28/60	R_Col_0_2.raw
	ALGVDTVPVLVGPVSYLLLSK	O50008	1	1	CID		57.5987	5.77131	1	1	627967	3	714.341	2141.01	348.722	101.5	36920	36920	MS2	40/120	R_Col_0_2.raw
	AAGATWIQLDEPVLVMDLEGQK	O50008	1	1	CID		68.5989	5.73637	1	1	2826585	2	1192.93	2384.86	269.968	91.3209	32942	32942	MS2	24/63	R_Col_0_2.raw
	ALGVDTVPVLVGPVSYLLLSK	O50008	1	1	CID		52.5449	5.53242	1	1	268804	3	713.675	2139.01	-585.982	100.13	36385	36385	MS2	42/120	R_Col_0_2.raw
	NIWANDFAASLSTLQALEGIVGK	O50008	1	1	CID		112.578	5.49207	1	1	2119565	3	807.093	2419.26	412.687	106.981	39062	39062	MS2	36/132	R_Col_0_2.raw
	GMLTGPVTILNWSFVR	Q9SRV5;O50008	3	2	CID		62.2898	5.46072	1	1	11362206	2	896.512	1792.02	587.895	92.2807	33320	33320	MS2	26/45	R_Col_0_2.raw
	ALGVDTVPVLVGPVSYLLLSK	O50008	1	1	CID		53.7613	5.45333	1	1	1.3253e+06	3	714.425	2141.26	465.437	99.7035	36218	36218	MS2	40/120	R_Col_0_2.raw
	DKLVVSTScSLLHTAVDLINETK	Q9SRV5;O50008	2	2	CID	C9(Carbamidomethyl)	95.8171	5.40388	1	1	543184	2	1272.69	2544.36	402.87	83.1164	29742	29742	MS2	24/66	R_Col_0_2.raw
	HETcYQIALAIKDEVEDLEK	Q9SRV5;O50008	2	2	CID	C4(Carbamidomethyl)	92.3649	5.2609	1	1	1.0001e+06	2	1203.18	2405.36	495.073	75.2642	26672	26672	MS2	24/57	R_Col_0_2.raw
	WFDTNYHYIVPELGPEVNFSYASHK	O50008	1	1	CID		97.7378	5.22807	1	1	2.9992e+06	3	1005.43	3014.28	285.564	76.3489	27095	27095	MS2	39/144	R_Col_0_2.raw
	LNLPILPTTTIGSFPQTVELR	Q9SRV5;O50008	2	2	CID		106.203	5.09847	1	1	1.52928e+06	2	1156.1	2311.19	383.198	89.2972	32153	32153	MS2	27/60	R_Col_0_2.raw
	AAGATWIQLDEPVLVMDLEGQK	O50008	1	1	CID		73.6771	5.05402	1	1	571379	2	1192.6	2384.19	-9.58105	91.5112	33017	33017	MS2	28/63	R_Col_0_2.raw
	MLAVLEQNILWVNPDcGLK	Q9SRV5;O50008	2	2	CID	C16(Carbamidomethyl)	106.482	4.80451	1	1	3.25596e+06	2	1107.52	2214.02	396.624	87.4864	31448	31448	MS2	25/54	R_Col_0_2.raw
	NIWANDFAASLSTLQALEGIVGK	O50008	1	1	CID		126.009	4.7701	1	1	1.16568e+06	3	806.76	2418.26	-0.670034	107.213	39152	39152	MS2	38/132	R_Col_0_2.raw
	KSEHAFYLDWAVHSFR	O50008	1	1	CID		117.231	4.71256	0.103325	1	1.2061e+06	2	997.43	1993.85	442.091	53.0485	17962	17962	MS2	22/45	R_Col_0_2.raw
	LNLPILPTTTIGSFPQTVELR	Q9SRV5;O50008	2	2	CID		96.308	4.69405	1	1	2.25711e+06	2	1155.68	2310.36	22.6352	90.3047	32546	32546	MS2	25/60	R_Col_0_2.raw
	GGIGVIQIDEAALR	Q9SRV5;O50008	2	2	CID		31.5024	4.64045	1	1	2.07639e+06	2	707.091	1413.18	979.847	62.8631	21819	21819	MS2	23/39	R_Col_0_2.raw
	KLNLPILPTTTIGSFPQTVELR	Q9SRV5;O50008	2	2	CID		68.5074	4.61156	1	1	1.56266e+06	2	1219.77	2438.53	51.8637	79.8034	28446	28446	MS2	20/63	R_Col_0_2.raw
	DEALFSANAAALASR	O50008	1	1	CID		20.3184	4.60993	0.237736	1	2.70364e+06	2	753.925	1506.84	58.954	56.8986	19478	19478	MS2	21/42	R_Col_0_2.raw
	LVVSTScSLLHTAVDLINETK	Q9SRV5;O50008	2	2	CID	C7(Carbamidomethyl)	35.4789	4.58833	1	1	0	3	767.856	2301.55	580.978	82.3703	29450	29450	MS2	37/120	R_Col_0_2.raw
	LVVSTScSLLHTAVDLINETK	Q9SRV5;O50008	2	2	CID	C7(Carbamidomethyl)	78.163	4.56516	1	1	1469377	2	1151.18	2301.36	496.345	82.8412	29635	29635	MS2	24/60	R_Col_0_2.raw
	ALGVDTVPVLVGPVSYLLLSK	O50008	1	1	CID		56.4235	4.55613	1	1	1.51301e+06	2	1071.18	2141.36	510.432	101.454	36902	36902	MS2	25/60	R_Col_0_2.raw
	ALGVDTVPVLVGPVSYLLLSK	O50008	1	1	CID		75.0917	4.43316	1	1	8420809	2	1071.18	2141.36	510.432	100.072	36362	36362	MS2	25/60	R_Col_0_2.raw
	GMLTGPVTILNWSFVR	Q9SRV5;O50008	3	2	CID		35.0951	4.27461	1	1	577743	3	598.089	1792.25	720.022	92.6839	33479	33479	MS2	38/90	R_Col_0_2.raw
	YGYTGGEIGLDVYFSMAR	O50008	1	1	CID		48.4814	4.237	1	1	60131.4	2	1000.26	1999.52	296.646	123.868	45039	45039	MS2	24/51	R_Col_0_2.raw
	MLAVLEQNILWVNPDcGLK	Q9SRV5;O50008	2	2	CID	C16(Carbamidomethyl)	70.2302	4.19585	1	1	1611323	2	1107.43	2213.86	321.369	88.8742	31988	31988	MS2	22/54	R_Col_0_2.raw
	YGYTGGEIGLDVYFSMAR	O50008	1	1	CID		71.0147	4.18341	1	1	98711.6	2	1000.51	2000.02	546.574	114.049	41735	41735	MS2	22/51	R_Col_0_2.raw
	SEHAFYLDWAVHSFR	O50008	1	1	CID		35.2071	4.09851	1	1	1.5969e+06	3	622.673	1866	604.269	62.6846	21750	21750	MS2	34/84	R_Col_0_2.raw
	AMTVFWSAMAQSMTSRPMK	O50008	1	1	CID		57.2531	4.06098	1	1	1948634	2	1081.6	2162.19	547.303	71.6141	25245	25245	MS2	17/54	R_Col_0_2.raw
	ALAGQKDEALFSANAAALASR	O50008	1	1	CID		38.0215	4.04711	1	1	8754676	3	692.758	2076.26	563.574	49.8114	16688	16688	MS2	29/120	R_Col_0_2.raw
	DKLVVSTScSLLHTAVDLINETK	Q9SRV5;O50008	2	2	CID	C9(Carbamidomethyl)	27.7871	3.99971	1	1	2.05394e+06	3	848.761	2544.27	364.998	83.1537	29756	29756	MS2	31/132	R_Col_0_2.raw
	DEALFSANAAALASR	O50008	1	1	CID		46.7897	3.99197	1	1	346791	2	754.425	1507.84	722.126	58.339	20047	20047	MS2	23/42	R_Col_0_2.raw
	GMLTGPVTILNWSFVR	Q9SRV5;O50008	3	2	CID		65.1306	3.96212	1	1	639826	2	896.678	1792.35	773.765	93.7738	33905	33905	MS2	16/45	R_Col_0_2.raw
	KLNLPILPTTTIGSFPQTVELR	Q9SRV5;O50008	2	2	CID		11.6939	3.95404	1	1	10026545	3	813.593	2438.77	149.016	80.3022	28640	28640	MS2	33/126	R_Col_0_2.raw
	LNLPILPTTTIGSFPQTVELR	Q9SRV5;O50008	2	2	CID		16.0096	3.95175	1	1	1.00052e+06	3	771.092	2311.26	413.592	90.8182	32746	32746	MS2	26/120	R_Col_0_2.raw
	HETcYQIALAIKDEVEDLEK	Q9SRV5;O50008	2	2	CID	C4(Carbamidomethyl)	47.273	3.91903	1	1	2337406	3	801.926	2403.76	-168.733	76.9543	27332	27332	MS2	27/114	R_Col_0_2.raw
	IPSSEEIADRVNK	O50008	1	1	CID		5.92111	3.88857	1	1	1.31812e+06	2	729.425	1457.84	57.0341	24.8504	6813	6813	MS2	20/36	R_Col_0_2.raw
	HETcYQIALAIKDEVEDLEK	Q9SRV5;O50008	2	2	CID	C4(Carbamidomethyl)	15.5554	3.84447	1	1	21905.5	3	802.51	2405.51	558.899	124.231	45157	45157	MS2	22/114	R_Col_0_2.raw
	LDDEIKSWLAFAAQK	O50008	1	1	CID		43.9859	3.80498	1	1	2.12916e+06	2	868.511	1736.01	638.539	75.3808	26717	26717	MS2	17/42	R_Col_0_2.raw
	FIPSNTFAHYDQVLDTTAMLGAVPPR	O50008	1	1	CID		51.5683	3.79586	1	1	2.70629e+06	2	1431.69	2862.37	328.62	80.4391	28694	28694	MS2	23/75	R_Col_0_2.raw
	MLAVLEQNILWVNPDcGLK	Q9SRV5;O50008	2	2	CID	C16(Carbamidomethyl)	3.883	3.78914	1	1	1.85214e+06	3	738.758	2214.26	503.59	88.8283	31970	31970	MS2	30/108	R_Col_0_2.raw
	GGIGVIQIDEAALR	Q9SRV5;O50008	2	2	CID		39.8718	3.77501	1	1	2.3087e+06	2	706.425	1411.84	36.3617	62.9547	21855	21855	MS2	22/39	R_Col_0_2.raw
	WFDTNYHYIVPELGPEVNFSYASHK	O50008	1	1	CID		23.0417	3.75211	1	1	1.51791e+06	3	1005.01	3013.03	-129.191	77.2187	27435	27435	MS2	24/144	R_Col_0_2.raw
	SFELLSLLPK	O50008	1	1	CID		23.3131	3.7416	1	1	8551189	2	573.922	1146.84	139.263	84.7669	30386	30386	MS2	19/27	R_Col_0_2.raw
	KLNLPILPTTTIGSFPQTVELR	Q9SRV5;O50008	2	2	CID		61.1725	3.73263	1	1	476438	2	1220.27	2439.53	461.766	81.1844	28986	28986	MS2	21/63	R_Col_0_2.raw
	YGYTGGEIGLDVYFSMAR	O50008	1	1	CID		64.1075	3.66377	1	1	26817.7	2	1000.6	2000.19	629.856	119.959	43757	43757	MS2	19/51	R_Col_0_2.raw
	MLAVLEQNILWVNPDcGLK	Q9SRV5;O50008	2	2	CID	C16(Carbamidomethyl)	46.687	3.64743	1	1	21455.3	2	1107.68	2214.36	547.1	125.394	45535	45535	MS2	15/54	R_Col_0_2.raw
	YGYTGGEIGLDVYFSMAR	O50008	1	1	CID		55.1408	3.55482	1	1	116668	2	1000.43	1999.85	463.279	111.036	40615	40615	MS2	20/51	R_Col_0_2.raw
	ALGVDTVPVLVGPVSYLLLSK	O50008	1	1	CID		58.085	3.53088	1	1	1.04453e+06	2	1070.68	2140.36	43.4495	101.459	36904	36904	MS2	20/60	R_Col_0_2.raw
	HETcYQIALAIKDEVEDLEK	Q9SRV5;O50008	2	2	CID	C4(Carbamidomethyl)	73.9676	3.5102	1	1	1.07239e+06	2	1202.02	2403.03	-475.462	76.1005	27000	27000	MS2	19/57	R_Col_0_2.raw
	DEALFSANAAALASR	O50008	1	1	CID		1	3.50932	1	1	3.7428e+06	2	754.425	1507.84	722.126	56.6719	19388	19388	MS2	21/42	R_Col_0_2.raw
	SEHAFYLDWAVHSFR	O50008	1	1	CID		63.4815	3.50784		2	974507	2	933.429	1865.85	521.992	61.3222	21219	21219	MS2	22/42	R_Col_0_2.raw
	MLAVLEQNILWVNPDcGLK	Q9SRV5;O50008	2	2	CID	C16(Carbamidomethyl)	20.4709	3.50042	1	1	18762.2	2	1107.43	2213.86	321.369	127.318	46158	46158	MS2	16/54	R_Col_0_2.raw
	GMLTGPVTILNWSFVR	Q9SRV5;O50008	3	2	CID		4.43907	3.4665	1	1	1.2831e+06	2	896.012	1791.02	29.8699	94.2644	34096	34096	MS2	13/45	R_Col_0_2.raw
	AMTVFWSAMAQSMTSRPMK	O50008	1	1	CID		72.9932	3.41498	1	1	1.03832e+06	2	1081.02	2161.02	7.72034	71.6615	25264	25264	MS2	20/54	R_Col_0_2.raw
	SFELLSLLPK	O50008	1	1	CID		30.5901	3.37373	1	1	1.09986e+06	2	573.839	1146.67	-6.06839	83.3654	29839	29839	MS2	19/27	R_Col_0_2.raw
	MLAVLEQNILWVNPDcGLK	Q9SRV5;O50008	2	2	CID	C16(Carbamidomethyl)	1.26631	3.36797	1	1	120483	2	1107.68	2214.36	547.1	113.393	41494	41494	MS2	16/54	R_Col_0_2.raw
	YGYTGGEIGLDVYFSMAR	O50008	1	1	CID		50.4021	3.3545	1	1	262622	2	1000.6	2000.19	629.856	109.609	40074	40074	MS2	19/51	R_Col_0_2.raw
	YLFAGVVDGR	Q9SRV5;O50008	2	2	CID		45.0329	3.3151	1	1	14620544	2	548.838	1096.67	82.4264	50.1789	16832	16832	MS2	21/27	R_Col_0_2.raw
	FALESFWDGK	Q9SRV5;O50008	3	2	CID		30.6859	3.30996	1	1	4.02115e+06	2	600.256	1199.5	-57.4181	69.8512	24554	24554	MS2	20/27	R_Col_0_2.raw
	GGIGVIQIDEAALR	Q9SRV5;O50008	2	2	CID		17.6705	3.18965	1	1	20677.7	2	707.008	1413.01	862.009	128.15	46429	46429	MS2	20/39	R_Col_0_2.raw
	YGYTGGEIGLDVYFSMAR	O50008	1	1	CID		30.8447	3.13674	1	1	408432	2	1000.35	1999.69	379.97	102.936	37482	37482	MS2	18/51	R_Col_0_2.raw
	FALESFWDGK	Q9SRV5;O50008	3	2	CID		39.5887	3.12452	1	1	2.6061e+06	2	600.839	1200.67	914.335	71.4113	25166	25166	MS2	19/27	R_Col_0_2.raw
	GGIGVIQIDEAALR	Q9SRV5;O50008	2	2	CID		45.4686	2.97638	1	1	944466	1	1411.69	1411.69	-72.4474	61.7332	21380	21380	MS2	19/39	R_Col_0_2.raw
P25696	55.41	57	444	47.6893	5.77002	526.769	Bifunctional enolase 2/transcriptional activator OS=Arabidopsis thaliana GN=ENO2 PE=1 SV=1 - [ENO2_ARATH]
	Sequence	Protein Accessions	# Proteins	# Protein Groups	Activation Type	Modifications	Probability	XCorr	Δ Score	Rank	Intensity	Charge	m/z [Da]	MH+ [Da]	ΔM [ppm]	RT [min]	First Scan	Last Scan	MS Order	Ions Matched	Spectrum File	Annotation
	MTTEcGTEVQIVGDDLLVTNPK	P25696	1	1	CID	C5(Carbamidomethyl)	58.7973	5.7103	1	1	1.05752e+06	2	1210.6	2420.19	10.8005	67.2589	23540	23540	MS2	24/63	R_Col_0_2.raw
	VTAAVPSGASTGIYEALELR	P25696	1	1	CID		55.6934	5.69141	1	1	4388374	2	1003.51	2006.02	478.458	71.2722	25112	25112	MS2	27/57	R_Col_0_2.raw
	MTTEcGTEVQIVGDDLLVTNPK	P25696	1	1	CID	C5(Carbamidomethyl)	56.1012	5.523	1	1	884175	2	1211.1	2421.19	423.823	66.4217	23213	23213	MS2	24/63	R_Col_0_2.raw
	VTAAVPSGASTGIYEALELR	P25696	1	1	CID		77.7674	5.3636	1	1	2.73845e+06	2	1003.43	2005.85	395.406	69.8975	24572	24572	MS2	29/57	R_Col_0_2.raw
	IEEELGSEAIYAGVNFR	P25696	1	1	CID		50.7827	5.24724	1	1	2.72525e+06	2	949.429	1897.85	483.34	66.2679	23152	23152	MS2	24/48	R_Col_0_2.raw
	VTAAVPSGASTGIYEALELR	P25696	1	1	CID		71.5089	4.93987	1	1	3.9251e+06	3	669.174	2005.51	222.75	70.8199	24934	24934	MS2	32/114	R_Col_0_2.raw
	YGQDATNVGDEGGFAPNIQENK	P25696	1	1	CID		54.3764	4.74355	1	1	969163	2	1162.52	2324.03	-7.13136	42.4124	13770	13770	MS2	21/63	R_Col_0_2.raw
	LAMQEFMILPVGAASFK	P25696	1	1	CID		50.0485	4.65424	1	1	5.0869e+06	2	927.012	1853.02	25.3028	88.2727	31754	31754	MS2	23/48	R_Col_0_2.raw
	IEEELGSEAIYAGVNFR	P25696	1	1	CID		73.9142	4.60063	1	1	781404	2	948.929	1896.85	-43.605	67.7062	23714	23714	MS2	21/48	R_Col_0_2.raw
	SGETEDTFIADLAVGLSTGQIK	P25696	1	1	CID		64.7038	4.44407	1	1	741304	2	1127.02	2253.02	397.401	93.9553	33976	33976	MS2	22/63	R_Col_0_2.raw
	LGANAILAVSLAVcK	P25696	1	1	CID	C14(Carbamidomethyl)	19.2629	4.4169	1	1	22769.6	2	751.092	1501.18	876.209	122.793	44689	44689	MS2	19/42	R_Col_0_2.raw
	SGETEDTFIADLAVGLSTGQIK	P25696	1	1	CID		67.2261	4.38149	1	1	25330.6	2	1127.1	2253.19	471.342	130.16	47084	47084	MS2	20/63	R_Col_0_2.raw
	SGETEDTFIADLAVGLSTGQIK	P25696	1	1	CID		57.005	4.29503	1	1	24645.5	2	1127.27	2253.52	619.191	122.297	44525	44525	MS2	23/63	R_Col_0_2.raw
	MTTEcGTEVQIVGDDLLVTNPK	P25696	1	1	CID	C5(Carbamidomethyl)	50.5921	4.26413	1	1	651072	2	1211.1	2421.19	423.823	69.4701	24406	24406	MS2	17/63	R_Col_0_2.raw
	LGANAILAVSLAVcK	P25696	1	1	CID	C14(Carbamidomethyl)	44.6994	4.22862	0.21033	1	19271.1	2	750.425	1499.84	-12.0112	125.451	45553	45553	MS2	22/42	R_Col_0_2.raw
	LGANAILAVSLAVcK	P25696	1	1	CID	C14(Carbamidomethyl)	21.9056	4.21776	1	1	856319	2	750.925	1500.84	654.302	83.6334	29944	29944	MS2	20/42	R_Col_0_2.raw
	VNQIGSVTESIEAVK	P25696	1	1	CID		16.7665	4.15848	0.160925	1	2.10325e+06	2	787.509	1574.01	106.943	47.9444	15953	15953	MS2	19/42	R_Col_0_2.raw
	SGETEDTFIADLAVGLSTGQIK	P25696	1	1	CID		81.4147	4.11123	1	1	30594.9	2	1126.93	2252.86	323.448	119.185	43504	43504	MS2	23/63	R_Col_0_2.raw
	IEEELGSEAIYAGVNFR	P25696	1	1	CID		46.4894	4.07539	1	1	17661	2	949.513	1898.02	571.11	121.702	44328	44328	MS2	19/48	R_Col_0_2.raw
	IEEELGSEAIYAGVNFR	P25696	1	1	CID		80.94	4.0704	1	1	31417.8	2	949.346	1897.68	395.554	124.045	45097	45097	MS2	20/48	R_Col_0_2.raw
	DPTQQTAIDNFMVHELDGTQNEWGWcK	P25696	1	1	CID	C26(Carbamidomethyl)	10.5684	3.98658	1	1	8685562	3	1074.6	3221.78	425.348	85.8242	30800	30800	MS2	30/156	R_Col_0_2.raw
	SFVAEYPIVSIEDPFDQDDWEHYAK	P25696	1	1	CID		60.4529	3.94718	1	1	3484009	3	1001.1	3001.28	306.072	86.5638	31088	31088	MS2	31/144	R_Col_0_2.raw
	AVGNVNNIIGPALIGK	P25696	1	1	CID		17.3369	3.92967	1	1	5.69245e+06	2	776.009	1551.01	712.435	60.6063	20936	20936	MS2	17/45	R_Col_0_2.raw
	SGETEDTFIADLAVGLSTGQIK	P25696	1	1	CID		59.3928	3.90306	1	1	530130	2	1127.27	2253.52	619.191	97.7902	35471	35471	MS2	19/63	R_Col_0_2.raw
	GNPTVEVDIHTSNGIK	P25696	1	1	CID		50.8698	3.84916	1	1	3.15949e+06	2	841.427	1681.85	589.702	31.0514	9275	9275	MS2	18/45	R_Col_0_2.raw
	VNQIGSVTESIEAVK	P25696	1	1	CID		69.2086	3.82985	1	1	4077754	2	787.509	1574.01	106.943	49.5832	16598	16598	MS2	25/42	R_Col_0_2.raw
	MTTEcGTEVQIVGDDLLVTNPK	P25696	1	1	CID	C5(Carbamidomethyl)	88.409	3.78645	1	1	514958	2	1209.85	2418.69	-609.374	68.0518	23850	23850	MS2	18/63	R_Col_0_2.raw
	LAMQEFmILPVGAASFK	P25696	1	1	CID	M7(Oxidation)	12.9093	3.77392	0.088183	1	769540	2	935.429	1869.85	473.637	88.5268	31853	31853	MS2	16/48	R_Col_0_2.raw
	IEEELGSEAIYAGVNFR	P25696	1	1	CID		44.3527	3.76348	1	1	18833.1	2	949.596	1898.18	658.865	130.698	47260	47260	MS2	20/48	R_Col_0_2.raw
	SGETEDTFIADLAVGLSTGQIK	P25696	1	1	CID		51.8679	3.75908	1	1	968001	2	1126.6	2252.19	27.5304	92.1488	33268	33268	MS2	21/63	R_Col_0_2.raw
	LGANAILAVSLAVcK	P25696	1	1	CID	C14(Carbamidomethyl)	40.1929	3.74236	0.111065	1	25929.3	2	750.675	1500.34	321.256	121.127	44141	44141	MS2	21/42	R_Col_0_2.raw
	IEEELGSEAIYAGVNFR	P25696	1	1	CID		57.1489	3.71555	1	1	2.04349e+06	2	948.929	1896.85	-43.605	66.311	23169	23169	MS2	21/48	R_Col_0_2.raw
	IEEELGSEAIYAGVNFR	P25696	1	1	CID		64.1589	3.70086	1	1	25220	2	949.513	1898.02	571.11	133.229	48089	48089	MS2	18/48	R_Col_0_2.raw
	SFVAEYPIVSIEDPFDQDDWEHYAK	P25696	1	1	CID		79.716	3.68147	1	1	536630	2	1501.11	3001.21	282.663	86.9104	31224	31224	MS2	26/72	R_Col_0_2.raw
	VTAAVPSGASTGIYEALELR	P25696	1	1	CID		93.3314	3.67894	1	1	1.89925e+06	2	1003.1	2005.19	63.0597	71.6117	25244	25244	MS2	23/57	R_Col_0_2.raw
	LGANAILAVSLAVcK	P25696	1	1	CID	C14(Carbamidomethyl)	43.8244	3.6726	1	1	216988	2	750.842	1500.68	543.311	106.348	38816	38816	MS2	21/42	R_Col_0_2.raw
	GNPTVEVDIHTSNGIK	P25696	1	1	CID		42.4245	3.65933	1	1	2169808	2	841.51	1682.01	688.733	30.412	9023	9023	MS2	20/45	R_Col_0_2.raw
	SGETEDTFIADLAVGLSTGQIK	P25696	1	1	CID		67.0201	3.62839	1	1	110641	2	1127.02	2253.02	397.401	113.851	41663	41663	MS2	23/63	R_Col_0_2.raw
	SGETEDTFIADLAVGLSTGQIK	P25696	1	1	CID		45.7015	3.60882	1	1	22475.7	2	1126.93	2252.86	323.448	127.75	46299	46299	MS2	19/63	R_Col_0_2.raw
	SGETEDTFIADLAVGLSTGQIK	P25696	1	1	CID		27.4795	3.58806	1	1	567100	2	1126.1	2251.19	-416.675	92.5367	33421	33421	MS2	19/63	R_Col_0_2.raw
	LGANAILAVSLAVcK	P25696	1	1	CID	C14(Carbamidomethyl)	15.3795	3.57238	1	1	829620	2	751.175	1501.34	987.125	94.5633	34213	34213	MS2	16/42	R_Col_0_2.raw
	IEEELGSEAIYAGVNFR	P25696	1	1	CID		59.469	3.53541	1	1	58108.5	2	949.346	1897.68	395.554	114.266	41814	41814	MS2	19/48	R_Col_0_2.raw
	LAMQEFMILPVGAASFK	P25696	1	1	CID		53.4217	3.5179	1	1	6851983	2	927.679	1854.35	744.328	89.6589	32294	32294	MS2	15/48	R_Col_0_2.raw
	AGAVVSGIPLYK	P25696	1	1	CID		26.8802	3.50482	1	1	6.354e+06	2	588.422	1175.84	981.532	45.8906	15141	15141	MS2	19/33	R_Col_0_2.raw
	VNQIGSVTESIEAVK	P25696	1	1	CID		60.8737	3.48538	1	1	1.04822e+06	2	787.009	1573.01	-528.724	49.7813	16677	16677	MS2	23/42	R_Col_0_2.raw
	LAmQEFMILPVGAASFK	P25696	1	1	CID	M3(Oxidation)	12.9093	3.44112		2	769540	2	935.429	1869.85	473.637	88.5268	31853	31853	MS2	16/48	R_Col_0_2.raw
	IEEELGSEAIYAGVNFR	P25696	1	1	CID		71.6149	3.36047	1	1	22234.8	2	949.429	1897.85	483.34	119.021	43450	43450	MS2	17/48	R_Col_0_2.raw
	LGANAILAVSLAVcK	P25696	1	1	CID	C14(Carbamidomethyl)	13.7695	3.33536	1	1	186146	2	750.342	1499.68	-123.15	108.872	39792	39792	MS2	16/42	R_Col_0_2.raw
	LGANAILAVSLAVcK	P25696	1	1	CID	C14(Carbamidomethyl)	31.1461	3.31451	1	1	723546	2	750.925	1500.84	654.302	103.623	37751	37751	MS2	16/42	R_Col_0_2.raw
	LGANAILAVSLAVcK	P25696	1	1	CID	C14(Carbamidomethyl)	21.2909	3.29744	1	1	1.1682e+06	2	751.092	1501.18	876.209	81.8345	29240	29240	MS2	16/42	R_Col_0_2.raw
	SGETEDTFIADLAVGLSTGQIK	P25696	1	1	CID		52.878	3.25198	1	1	86758.3	2	1126.77	2252.52	175.511	112.347	41110	41110	MS2	19/63	R_Col_0_2.raw
	GNPTVEVDIHTSNGIK	P25696	1	1	CID		28.3244	3.19827	1	1	1.31996e+06	2	841.427	1681.85	589.702	32.4248	9821	9821	MS2	15/45	R_Col_0_2.raw
	LGANAILAVSLAVcK	P25696	1	1	CID	C14(Carbamidomethyl)	39.8277	3.19655	1	1	794901	2	751.009	1501.01	765.267	91.2936	32932	32932	MS2	13/42	R_Col_0_2.raw
	LGANAILAVSLAVcK	P25696	1	1	CID	C14(Carbamidomethyl)	57.7816	3.17196	1	1	30757	2	750.509	1500.01	99.1026	133.057	48033	48033	MS2	22/42	R_Col_0_2.raw
	SGETEDTFIADLAVGLSTGQIK	P25696	1	1	CID		69.9159	3.15919	1	1	24127.8	2	1126.27	2251.52	-268.563	122.787	44687	44687	MS2	21/63	R_Col_0_2.raw
	SGETEDTFIADLAVGLSTGQIK	P25696	1	1	CID		1	3.12224		2	119231	2	1126.1	2251.19	-416.675	110.785	40520	40520	MS2	13/63	R_Col_0_2.raw
	AGAVVSGIPLYK	P25696	1	1	CID		6.87853	2.86184	1	1	2124275	1	1174.77	1174.77	71.357	45.1222	14838	14838	MS2	17/33	R_Col_0_2.raw
Q9SR37	55.53	56	524	59.6827	6.91748	511.9	Beta-glucosidase 23 OS=Arabidopsis thaliana GN=BGLU23 PE=1 SV=1 - [BGL23_ARATH]
	Sequence	Protein Accessions	# Proteins	# Protein Groups	Activation Type	Modifications	Probability	XCorr	Δ Score	Rank	Intensity	Charge	m/z [Da]	MH+ [Da]	ΔM [ppm]	RT [min]	First Scan	Last Scan	MS Order	Ions Matched	Spectrum File	Annotation
	NGITPFVTVFHWDTPQDLEDEYGGFLSER	Q9SR37	1	1	CID		87.7	6.62353	1	1	3.85532e+06	3	1124.18	3370.53	285.791	97.0763	35192	35192	MS2	41/168	R_Col_0_2.raw
	IGIAHSPAWFEAHDLADSQDGASIDR	Q9SR37	1	1	CID		109.612	6.50754	1	1	15207078	3	927.429	2780.27	346.97	53.2915	18056	18056	MS2	35/150	R_Col_0_2.raw
	SGYEAYLVTHNLLISHAEAVEAYR	Q9SR37	1	1	CID		116.264	6.4653	1	1	5.49396e+06	3	903.095	2707.27	339.146	67.6024	23673	23673	MS2	42/138	R_Col_0_2.raw
	SGYEAYLVTHNLLISHAEAVEAYRK	Q9SR37	1	1	CID		96.2336	6.24785	1	1	3510312	3	945.762	2835.27	291.212	60.7013	20973	20973	MS2	41/144	R_Col_0_2.raw
	SGYEAYLVTHNLLISHAEAVEAYR	Q9SR37	1	1	CID		122.691	6.15578	1	1	744837	3	902.428	2705.27	-399.915	68.0257	23839	23839	MS2	49/138	R_Col_0_2.raw
	NAQNYAIGSKPLTAALNVYSR	Q9SR37	1	1	CID		97.7163	5.53515	1	1	2.4422e+06	2	1126.52	2252.02	373.737	55.0295	18741	18741	MS2	23/60	R_Col_0_2.raw
	GVSQAGVQFYHDLIDELIK	Q9SR37	1	1	CID		107.572	5.365		2	5532753	2	1067.1	2133.19	509.44	90.5833	32654	32654	MS2	30/54	R_Col_0_2.raw
	GVSQAGVQFYHDLIDELIK	Q9SR37	1	1	CID		102.168	5.33582		2	1.35637e+06	2	1066.51	2132.02	-37.5029	90.9075	32781	32781	MS2	27/54	R_Col_0_2.raw
	NAQNYAIGSKPLTAALNVYSR	Q9SR37	1	1	CID		98.8076	5.31793	1	1	26283448	3	751.425	2252.26	478.9	54.1576	18398	18398	MS2	34/120	R_Col_0_2.raw
	YANPEIMIMENGYGEELGASDSVAVGTADHNR	Q9SR37	1	1	CID		85.1533	5.22537	1	1	1.06722e+06	3	1137.85	3411.53	295.334	71.0731	25035	25035	MS2	35/186	R_Col_0_2.raw
	HWITFNEPWVFSHAGYDVGK	Q9SR37	1	1	CID		120.228	5.18122	1	1	6.48781e+06	3	797.76	2391.26	472.122	69.4857	24411	24411	MS2	37/114	R_Col_0_2.raw
	NAQNYAIGSKPLTAALNVYSR	Q9SR37	1	1	CID		117.452	5.10091	1	1	885182	2	1126.52	2252.02	373.737	53.6435	18197	18197	MS2	25/60	R_Col_0_2.raw
	SGYEAYLVTHNLLISHAEAVEAYR	Q9SR37	1	1	CID		98.7015	5.082	1	1	557955	2	1353.85	2706.7	128.524	67.5792	23665	23665	MS2	29/69	R_Col_0_2.raw
	NAQNYAIGSKPLTAALNVYSR	Q9SR37	1	1	CID		117.322	4.98823	1	1	1.99973e+06	2	1126.1	2251.19	3.69336	55.0341	18743	18743	MS2	25/60	R_Col_0_2.raw
	SGYEAYLVTHNLLISHAEAVEAYR	Q9SR37	1	1	CID		60.932	4.86559	1	1	173132	3	903.095	2707.27	339.146	112.055	41000	41000	MS2	29/138	R_Col_0_2.raw
	cNNDNGDVAVDFFHR	Q9SR37	1	1	CID	C1(Carbamidomethyl)	69.2048	4.80863	1	1	17725798	3	594.006	1780	141.613	44.9794	14780	14780	MS2	33/84	R_Col_0_2.raw
	HWITFNEPWVFSHAGYDVGK	Q9SR37	1	1	CID		105.216	4.80679	1	1	605061	2	1195.68	2390.36	94.2715	68.7799	24134	24134	MS2	23/57	R_Col_0_2.raw
	SGYEAYLVTHNLLISHAEAVEAYR	Q9SR37	1	1	CID		38.3219	4.74597	1	1	31678	3	903.095	2707.27	339.146	115.961	42422	42422	MS2	29/138	R_Col_0_2.raw
	IGIAHSPAWFEAHDLADSQDGASIDR	Q9SR37	1	1	CID		20.4498	4.69538	1	1	813997	2	1390.69	2780.37	381.628	52.8569	17886	17886	MS2	21/75	R_Col_0_2.raw
	NGITPFVTVFHWDTPQDLEDEYGGFLSER	Q9SR37	1	1	CID		58.0232	4.53501	1	1	290390	3	1123.85	3369.53	-10.907	100.786	36641	36641	MS2	33/168	R_Col_0_2.raw
	SGYEAYLVTHNLLISHAEAVEAYR	Q9SR37	1	1	CID		34.2155	4.41358	1	1	111446	3	903.262	2707.77	523.741	113.701	41608	41608	MS2	31/138	R_Col_0_2.raw
	SGYEAYLVTHNLLISHAEAVEAYR	Q9SR37	1	1	CID		41.1746	4.33875	1	1	53219.9	3	902.678	2706.02	-122.639	129.763	46955	46955	MS2	28/138	R_Col_0_2.raw
	ALDFILGWHLDTTTFGDYPQIMK	Q9SR37	1	1	CID		96.3681	4.29449	1	1	440123	2	1342.02	2683.03	263.016	94.9721	34372	34372	MS2	23/66	R_Col_0_2.raw
	NAQNYAIGSKPLTAALNVYSR	Q9SR37	1	1	CID		142.825	4.25985	1	1	769242	2	1125.43	2249.86	-588.946	55.1005	18770	18770	MS2	25/60	R_Col_0_2.raw
	ALDFILGWHLDTTTFGDYPQIMK	Q9SR37	1	1	CID		7.18068	4.04783	1	1	119036	3	895.262	2683.77	537.54	112.278	41084	41084	MS2	31/132	R_Col_0_2.raw
	YYKDFLSQGVRPSALK	Q9SR37	1	1	CID		38.9742	4.03344	1	1	968697	2	936.512	1872.02	8.47966	38.8866	12379	12379	MS2	18/45	R_Col_0_2.raw
	ALDFILGWHLDTTTFGDYPQIMK	Q9SR37	1	1	CID		23.4336	4.01646	1	1	2.01913e+06	3	894.845	2682.52	71.8022	95.6455	34634	34634	MS2	37/132	R_Col_0_2.raw
	NGITPFVTVFHWDTPQDLEDEYGGFLSER	Q9SR37	1	1	CID		107.12	3.99251	1	1	711086	3	1124.1	3370.28	211.633	102.608	37353	37353	MS2	40/168	R_Col_0_2.raw
	VKHWITFNEPWVFSHAGYDVGK	Q9SR37	1	1	CID		49.982	3.98124	1	1	1.78331e+06	3	873.011	2617.02	-107.013	61.0783	21123	21123	MS2	25/126	R_Col_0_2.raw
	cNNDNGDVAVDFFHR	Q9SR37	1	1	CID	C1(Carbamidomethyl)	42.3996	3.88853	1	1	9917534	2	890.428	1779.85	55.3197	44.707	14672	14672	MS2	22/42	R_Col_0_2.raw
	ALDFILGWHLDTTTFGDYPQIMK	Q9SR37	1	1	CID		44.6693	3.85712	1	1	33107.9	2	1342.27	2683.53	449.292	118.225	43188	43188	MS2	21/66	R_Col_0_2.raw
	EYADFVFQEYGGK	Q9SR37	1	1	CID		52.4441	3.8503	1	1	9886899	2	776.926	1552.84	95.9556	60.1914	20774	20774	MS2	18/36	R_Col_0_2.raw
	DFREYADFVFQEYGGK	Q9SR37	1	1	CID		50.6661	3.79611	1	1	1.22771e+06	2	986.513	1972.02	571.642	80.8288	28847	28847	MS2	22/45	R_Col_0_2.raw
	IGIAHSPAWFEAHDLADSQDGASIDR	Q9SR37	1	1	CID		59.6333	3.76059	1	1	650022	2	1390.1	2779.2	-38.0048	53.689	18215	18215	MS2	21/75	R_Col_0_2.raw
	ALDFILGWHLDTTTFGDYPQIMK	Q9SR37	1	1	CID		13.7067	3.75439	1	1	516421	3	895.262	2683.77	537.54	100.17	36401	36401	MS2	29/132	R_Col_0_2.raw
	ALDFILGWHLDTTTFGDYPQIMK	Q9SR37	1	1	CID		1	3.70333	1	1	614713	3	895.262	2683.77	537.54	98.6554	35808	35808	MS2	29/132	R_Col_0_2.raw
	YYKDFLSQGVRPSALKK	Q9SR37	1	1	CID		41.003	3.66445	1	1	815910	2	1000.51	2000.02	-38.3097	31.0307	9268	9268	MS2	20/48	R_Col_0_2.raw
	NGITPFVTVFHWDTPQDLEDEYGGFLSER	Q9SR37	1	1	CID		68.8078	3.64865	1	1	402239	2	1685.78	3370.55	289.665	96.4641	34954	34954	MS2	21/84	R_Col_0_2.raw
	FGLYYVDFK	Q9C525-2;Q9SR37;Q9C8Y9	4	3	CID		28.4709	3.58584	1	1	3284308	2	576.339	1151.67	80.6466	66.7251	23331	23331	MS2	19/24	R_Col_0_2.raw
	GPALWDIYcR	Q9C525-2;Q9SR37	3	2	CID	C9(Carbamidomethyl)	38.5515	3.56525	1	1	21601138	2	625.923	1250.84	191.838	59.6459	20558	20558	MS2	19/27	R_Col_0_2.raw
	FGLYYVDFK	Q9C525-2;Q9SR37;Q9C8Y9	4	3	CID		24.1945	3.49777	1	1	5.36131e+06	2	576.839	1152.67	948.144	66.5387	23258	23258	MS2	19/24	R_Col_0_2.raw
	EYADFVFQEYGGK	Q9SR37	1	1	CID		35.862	3.49593	1	1	4.03112e+06	2	777.509	1554.01	846.643	59.9661	20685	20685	MS2	17/36	R_Col_0_2.raw
	DFLSQGVRPSALK	Q9SR37	1	1	CID		21.9492	3.4125	1	1	5676179	2	709.925	1418.84	748.535	40.6863	13088	13088	MS2	20/36	R_Col_0_2.raw
	EYADFVFQEYGGK	Q9SR37	1	1	CID		31.5836	3.40464	1	1	1620165	2	777.426	1553.84	739.471	63.4246	22038	22038	MS2	12/36	R_Col_0_2.raw
	FGLYYVDFK	Q9C525-2;Q9SR37;Q9C8Y9	4	3	CID		25.4726	3.39639	1	1	3.35237e+06	2	576.339	1151.67	80.6466	65.0273	22665	22665	MS2	18/24	R_Col_0_2.raw
	ALDFILGWHLDTTTFGDYPQIMK	Q9SR37	1	1	CID		24.3253	3.38675	1	1	36681.5	2	1341.69	2682.37	14.5396	122.508	44596	44596	MS2	22/66	R_Col_0_2.raw
	WMQDSLITWESK	Q9SR37	1	1	CID		50.9685	3.35198	1	1	10160211	2	762.926	1524.84	737.126	64.4249	22430	22430	MS2	20/33	R_Col_0_2.raw
	EKGVSQAGVQFYHDLIDELIK	Q9SR37	1	1	CID		40.9844	3.33542		2	1.44957e+06	2	1195.6	2390.19	399.186	83.4204	29861	29861	MS2	17/60	R_Col_0_2.raw
	SGYEAYLVTHNLLISHAEAVEAYR	Q9SR37	1	1	CID		52.103	3.29137	1	1	76215.2	2	1354.02	2707.03	251.646	124.09	45111	45111	MS2	18/69	R_Col_0_2.raw
	WMQDSLITWESK	Q9SR37	1	1	CID		31.092	3.2781	1	1	1.63421e+06	2	762.426	1523.84	81.3622	66.2703	23153	23153	MS2	15/33	R_Col_0_2.raw
	HWITFNEPWVFSHAGYDVGK	Q9SR37	1	1	CID		19.0918	3.23017	1	1	386892	2	1195.93	2390.86	303.386	70.2463	24710	24710	MS2	19/57	R_Col_0_2.raw
	DFLSQGVRPSALKK	Q9SR37	1	1	CID		1.91066	3.19339	1	1	2.34174e+06	2	773.426	1545.84	-19.7052	30.4518	9038	9038	MS2	17/39	R_Col_0_2.raw
	HLLSMQEAVcIDK	Q9SR37	1	1	CID	C10(Carbamidomethyl)	1	3.18614	1	1	2.07584e+06	2	772.509	1544.01	162.056	40.9692	13200	13200	MS2	16/36	R_Col_0_2.raw
	WMQDSLITWESK	Q9SR37	1	1	CID		35.3026	3.17736	1	1	3.03901e+06	2	761.759	1522.51	-794.33	64.8857	22610	22610	MS2	22/33	R_Col_0_2.raw
	SGYEAYLVTHNLLISHAEAVEAYR	Q9SR37	1	1	CID		14.6071	3.15672	1	1	37816.6	2	1353.85	2706.7	128.524	127.614	46254	46254	MS2	17/69	R_Col_0_2.raw
	EYADFVFQEYGGK	Q9SR37	1	1	CID		72.8814	2.9126	1	1	1.00412e+06	1	1552.86	1552.86	104.365	60.3017	20818	20818	MS2	16/36	R_Col_0_2.raw
P25858	57.1	55	338	36.8911	7.12256	492.79	Glyceraldehyde-3-phosphate dehydrogenase GAPC1, cytosolic OS=Arabidopsis thaliana GN=GAPC1 PE=1 SV=2 - [G3PC1_ARATH]
	Sequence	Protein Accessions	# Proteins	# Protein Groups	Activation Type	Modifications	Probability	XCorr	Δ Score	Rank	Intensity	Charge	m/z [Da]	MH+ [Da]	ΔM [ppm]	RT [min]	First Scan	Last Scan	MS Order	Ions Matched	Spectrum File	Annotation
	FGIVEGLMTTVHSITATQK	P25858	2	1	CID		95.4003	6.33523	1	1	3.01309e+06	2	1016.93	2032.85	-108.169	82.2393	29399	29399	MS2	25/54	R_Col_0_2.raw
	FGIVEGLMTTVHSITATQK	P25858	2	1	CID		90.8254	6.18384	1	1	4.23521e+06	2	1017.51	2034.02	465.481	82.2321	29396	29396	MS2	26/54	R_Col_0_2.raw
	SDLDIVSNAScTTNcLAPLAK	P25858	2	1	CID	C11(Carbamidomethyl) C15(Carbamidomethyl)	77.1441	5.61555	1	1	5804773	2	1126.02	2251.02	422.26	63.6461	22124	22124	MS2	29/60	R_Col_0_2.raw
	GILGYTEDDVVSTDFVGDNR	P25858	2	1	CID		121.13	5.39777	1	1	8.31364e+06	2	1087.02	2173.02	466.602	71.1346	25058	25058	MS2	28/57	R_Col_0_2.raw
	GILGYTEDDVVSTDFVGDNR	P25858	2	1	CID		112.022	5.19034	1	1	1.34475e+06	2	1086.85	2172.69	313.25	72.5182	25599	25599	MS2	24/57	R_Col_0_2.raw
	VPTVDVSVVDLTVR	P25858	2	1	CID		67.4564	5.15153	1	1	6.55695e+06	2	750.509	1500.01	775.021	68.0145	23834	23834	MS2	24/39	R_Col_0_2.raw
	FGIVEGLMTTVHSITATQK	P25858	2	1	CID		54.3912	5.04984	1	1	1.78275e+06	2	1017.1	2033.19	55.7981	80.8699	28863	28863	MS2	21/54	R_Col_0_2.raw
	GILGYTEDDVVSTDFVGDNR	P25858	2	1	CID		69.1472	4.95896	1	1	23588.4	2	1087.1	2173.19	543.259	131.863	47638	47638	MS2	24/57	R_Col_0_2.raw
	VPTVDVSVVDLTVR	P25858	2	1	CID		69.6577	4.83073	1	1	5997253	2	750.425	1499.84	663.982	66.6312	23294	23294	MS2	25/39	R_Col_0_2.raw
	VPTVDVSVVDLTVR	P25858	2	1	CID		70.3252	4.7915	1	1	5.59528e+06	2	749.925	1498.84	-2.76898	68.5182	24032	24032	MS2	23/39	R_Col_0_2.raw
	GILGYTEDDVVSTDFVGDNR	P25858	2	1	CID		93.1291	4.77334	1	1	29288.2	2	1086.93	2172.86	389.932	124.315	45185	45185	MS2	25/57	R_Col_0_2.raw
	DAPMFVVGVNEHEYKSDLDIVSNAScTTNcLAPLAK	P25858	2	1	CID	C26(Carbamidomethyl) C30(Carbamidomethyl)	68.7838	4.74464	1	1	1.0458e+06	3	1323.02	3967.04	295.643	76.4589	27139	27139	MS2	37/210	R_Col_0_2.raw
	GILGYTEDDVVSTDFVGDNR	P25858	2	1	CID		93.5682	4.70868	1	1	26497.6	2	1086.43	2171.86	-70.3331	128.955	46690	46690	MS2	24/57	R_Col_0_2.raw
	VPTVDVSVVDLTVR	P25858	2	1	CID		88.4333	4.69577	1	1	6647360	2	750.009	1499.01	108.418	66.6335	23295	23295	MS2	21/39	R_Col_0_2.raw
	VPTVDVSVVDLTVR	P25858	2	1	CID		81.6709	4.6573	1	1	2.46872e+06	2	750.425	1499.84	663.982	69.9	24573	24573	MS2	23/39	R_Col_0_2.raw
	GILGYTEDDVVSTDFVGDNR	P25858	2	1	CID		75.7828	4.63022	1	1	575260	2	1086.6	2172.19	83.1357	69.7488	24515	24515	MS2	24/57	R_Col_0_2.raw
	DDVELVAVNDPFITTEYMTYMFK	P25858	2	1	CID		79.1706	4.62514	1	1	1.96702e+06	3	914.345	2741.02	-91.757	103.021	37515	37515	MS2	33/132	R_Col_0_2.raw
	TLLFGEKPVTVFGIR	P25858	2	1	CID		92.6698	4.52232	1	1	5.48826e+06	2	839.01	1677.01	23.9011	67.4163	23600	23600	MS2	27/42	R_Col_0_2.raw
	GILGYTEDDVVSTDFVGDNR	P25858	2	1	CID		79.5216	4.22845	1	1	1.11117e+06	2	1086.02	2171.02	-454.211	73.052	25808	25808	MS2	24/57	R_Col_0_2.raw
	DAPMFVVGVNEHEYK	P25858	2	1	CID		81.7231	4.21108	1	1	8.07235e+06	2	868.428	1735.85	594.743	47.3914	15734	15734	MS2	22/42	R_Col_0_2.raw
	LVSWYDNEWGYSSR	P25858	2	1	CID		63.8599	4.08684	1	1	11852403	2	881.428	1761.85	35.0635	61.8444	21422	21422	MS2	20/39	R_Col_0_2.raw
	VPTVDVSVVDLTVR	P25858	2	1	CID		61.7871	4.05124	1	1	578227	2	749.675	1498.34	-336.478	70.4056	24770	24770	MS2	21/39	R_Col_0_2.raw
	TLLFGEKPVTVFGIR	P25858	2	1	CID		17.3378	4.01719	1	1	7.39605e+06	3	560.005	1678	612.063	66.861	23384	23384	MS2	33/84	R_Col_0_2.raw
	TLLFGEKPVTVFGIR	P25858	2	1	CID		19.8356	4.01374	1	1	2119065	3	559.922	1677.75	463.142	68.7052	24104	24104	MS2	32/84	R_Col_0_2.raw
	AASFNIIPSSTGAAK	P25858	2	1	CID		28.9642	4.00427	1	1	52489080	2	717.925	1434.84	58.1471	43.7922	14312	14312	MS2	24/42	R_Col_0_2.raw
	VPTVDVSVVDLTVR	P25858	2	1	CID		45.1544	3.88192	1	1	3.1424e+06	2	750.092	1499.18	219.58	71.8761	25347	25347	MS2	18/39	R_Col_0_2.raw
	VPTVDVSVVDLTVR	P25858	2	1	CID		46.4932	3.85412	1	1	2.21217e+06	2	750.675	1500.34	997.024	71.7813	25310	25310	MS2	20/39	R_Col_0_2.raw
	FGIVEGLmTTVHSITATQK	P25858	2	1	CID	M8(Oxidation)	43.2961	3.84015	1	1	1462115	2	1025.01	2049.02	-23.3416	81.8754	29256	29256	MS2	15/54	R_Col_0_2.raw
	FGIVEGLMTTVHSITATQK	P25858	2	1	CID		63.8919	3.83124	1	1	45418548	3	678.757	2034.26	581.904	81.5468	29126	29126	MS2	33/108	R_Col_0_2.raw
	FGIVEGLMTTVHSITATQK	P25858	2	1	CID		68.7254	3.82373	1	1	5891737	3	678.507	2033.51	213.291	82.8487	29638	29638	MS2	36/108	R_Col_0_2.raw
	VPTVDVSVVDLTVR	P25858	2	1	CID		56.0614	3.82259	1	1	166652	2	750.509	1500.01	775.021	111.076	40630	40630	MS2	19/39	R_Col_0_2.raw
	GILGYTEDDVVSTDFVGDNR	P25858	2	1	CID		74.6652	3.79252	1	1	20676.7	2	1086.6	2172.19	83.1357	127.076	46080	46080	MS2	21/57	R_Col_0_2.raw
	VPTVDVSVVDLTVR	P25858	2	1	CID		33.7029	3.75248	1	1	1.76443e+06	2	750.509	1500.01	775.021	73.5984	26020	26020	MS2	19/39	R_Col_0_2.raw
	LVSWYDNEWGYSSR	P25858	2	1	CID		24.612	3.75056	1	1	311106	2	881.428	1761.85	35.0635	63.4598	22052	22052	MS2	16/39	R_Col_0_2.raw
	GILGYTEDDVVSTDFVGDNR	P25858	2	1	CID		54.2256	3.68868	1	1	199935	2	1087.02	2173.02	466.602	109.037	39855	39855	MS2	23/57	R_Col_0_2.raw
	VPTVDVSVVDLTVR	P25858	2	1	CID		30.2903	3.68074	1	1	468606	2	750.425	1499.84	663.982	102.254	37215	37215	MS2	16/39	R_Col_0_2.raw
	VPTVDVSVVDLTVR	P25858	2	1	CID		66.9502	3.65161	1	1	101309	2	749.925	1498.84	-2.76898	112.789	41272	41272	MS2	17/39	R_Col_0_2.raw
	GILGYTEDDVVSTDFVGDNR	P25858	2	1	CID		82.1466	3.64999	1	1	38784.9	2	1086.35	2171.69	-147.085	116.842	42729	42729	MS2	25/57	R_Col_0_2.raw
	GILGYTEDDVVSTDFVGDNR	P25858	2	1	CID		84.1336	3.59052	1	1	30385.5	2	1086.6	2172.19	83.1357	122.545	44608	44608	MS2	22/57	R_Col_0_2.raw
	VPTVDVSVVDLTVR	P25858	2	1	CID		50.2356	3.56891	1	1	69264.4	2	750.425	1499.84	663.982	116.475	42603	42603	MS2	20/39	R_Col_0_2.raw
	GILGYTEDDVVSTDFVGDNR	P25858	2	1	CID		41.307	3.4616	1	1	326631	2	1086.93	2172.86	389.932	105.006	38293	38293	MS2	19/57	R_Col_0_2.raw
	GILGYTEDDVVSTDFVGDNR	P25858	2	1	CID		25.7685	3.45217	1	1	462417	2	1087.1	2173.19	543.259	103.404	37666	37666	MS2	19/57	R_Col_0_2.raw
	FGIVEGLMTTVHSITATQK	P25858	2	1	CID		1.34195	3.40049	1	1	892263	2	1017.68	2034.35	629.26	83.9547	30069	30069	MS2	16/54	R_Col_0_2.raw
	VPTVDVSVVDLTVR	P25858	2	1	CID		30.2503	3.3637	1	1	27309.5	2	750.425	1499.84	663.982	123.56	44940	44940	MS2	18/39	R_Col_0_2.raw
	DDVELVAVNDPFITTEYMTYMFK	P25858	2	1	CID		66.8263	3.35636	1	1	2.02045e+06	2	1371.6	2742.2	338.502	102.282	37226	37226	MS2	24/66	R_Col_0_2.raw
	VPTVDVSVVDLTVR	P25858	2	1	CID		24.2712	3.33921		2	19271.1	2	750.425	1499.84	663.982	125.451	45553	45553	MS2	17/39	R_Col_0_2.raw
	DAPMFVVGVNEHEYK	P25858	2	1	CID		33.1871	3.33439	1	1	619215	2	867.511	1734.01	-461.925	48.0903	16012	16012	MS2	19/42	R_Col_0_2.raw
	VPTVDVSVVDLTVR	P25858	2	1	CID		10.8028	3.32672		2	25929.3	2	750.675	1500.34	997.024	121.127	44141	44141	MS2	17/39	R_Col_0_2.raw
	GILGYTEDDVVSTDFVGDNR	P25858	2	1	CID		83.6719	3.32624	1	1	17835.8	2	1086.27	2171.52	-223.849	124.851	45358	45358	MS2	23/57	R_Col_0_2.raw
	VVDLIVHMSK	P25858	2	1	CID		35.0802	3.30992	1	1	3.00321e+06	2	571.255	1141.5	752.179	36.4636	11415	11415	MS2	19/27	R_Col_0_2.raw
	NPEDIPWAEAGADYVVESTGVFTDKDK	P25858	1	1	CID		93.8068	3.27975	1	1	709679	2	1477.36	2953.7	112.063	85.4462	30653	30653	MS2	21/78	R_Col_0_2.raw
	VPTVDVSVVDLTVR	P25858	2	1	CID		49.7561	3.27677	1	1	78605.9	2	749.842	1498.68	-113.981	114.351	41845	41845	MS2	19/39	R_Col_0_2.raw
	GILGYTEDDVVSTDFVGDNR	P25858	2	1	CID		51.7091	3.22345	1	1	85814.4	2	1086.27	2171.52	-223.849	110.622	40459	40459	MS2	14/57	R_Col_0_2.raw
	VPTVDVSVVDLTVR	P25858	2	1	CID		63.3044	3.17424	1	1	203303	2	750.175	1499.34	330.718	104.83	38224	38224	MS2	14/39	R_Col_0_2.raw
	VPTVDVSVVDLTVR	P25858	2	1	CID		42.7467	3.1366	1	1	1843628	2	749.342	1497.68	-781.77	72.2117	25478	25478	MS2	15/39	R_Col_0_2.raw
Q9SRV5	31.76	42	765	84.5306	6.50732	451.772	5-methyltetrahydropteroyltriglutamate--homocysteine methyltransferase 2 OS=Arabidopsis thaliana GN=MS2 PE=1 SV=1 - [METE2_ARATH]
	Sequence	Protein Accessions	# Proteins	# Protein Groups	Activation Type	Modifications	Probability	XCorr	Δ Score	Rank	Intensity	Charge	m/z [Da]	MH+ [Da]	ΔM [ppm]	RT [min]	First Scan	Last Scan	MS Order	Ions Matched	Spectrum File	Annotation
	HETcYQIALAIKDEVEDLEK	Q9SRV5;O50008	2	2	CID	C4(Carbamidomethyl)	93.7401	6.15711	1	1	938606	2	1202.68	2404.36	79.3598	75.486	26759	26759	MS2	28/57	R_Col_0_2.raw
	ALGVETVPVLVGPVSYLLLSK	Q9SRV5	1	1	CID		50.6179	5.64208	1	1	1.45011e+06	3	718.841	2154.51	107.323	99.8262	36267	36267	MS2	39/120	R_Col_0_2.raw
	GMLTGPVTILNWSFVR	Q9SRV5;O50008	3	2	CID		62.2898	5.46072	1	1	11362206	2	896.512	1792.02	587.895	92.2807	33320	33320	MS2	26/45	R_Col_0_2.raw
	DKLVVSTScSLLHTAVDLINETK	Q9SRV5;O50008	2	2	CID	C9(Carbamidomethyl)	95.8171	5.40388	1	1	543184	2	1272.69	2544.36	402.87	83.1164	29742	29742	MS2	24/66	R_Col_0_2.raw
	ALAGQTNESFFTANADALSSR	Q9SRV5	1	1	CID		93.308	5.33823	1	1	1.04889e+06	2	1085.93	2170.86	-82.9132	58.516	20117	20117	MS2	26/60	R_Col_0_2.raw
	ALGVETVPVLVGPVSYLLLSK	Q9SRV5	1	1	CID		51.5203	5.31257	1	1	557530	3	719.091	2155.26	455.278	99.1065	35984	35984	MS2	36/120	R_Col_0_2.raw
	NIWANDLAASLITLQSLEGVVGK	Q9SRV5	1	1	CID		113.322	5.29325	1	1	929216	3	805.093	2413.26	394.21	106.24	38774	38774	MS2	37/132	R_Col_0_2.raw
	HETcYQIALAIKDEVEDLEK	Q9SRV5;O50008	2	2	CID	C4(Carbamidomethyl)	92.3649	5.2609	1	1	1.0001e+06	2	1203.18	2405.36	495.073	75.2642	26672	26672	MS2	24/57	R_Col_0_2.raw
	LNLPILPTTTIGSFPQTVELR	Q9SRV5;O50008	2	2	CID		106.203	5.09847	1	1	1.52928e+06	2	1156.1	2311.19	383.198	89.2972	32153	32153	MS2	27/60	R_Col_0_2.raw
	ALGVETVPVLVGPVSYLLLSK	Q9SRV5	1	1	CID		56.1398	4.85917	1	1	2.00155e+06	2	1078.27	2155.52	577.265	100.348	36470	36470	MS2	19/60	R_Col_0_2.raw
	MLAVLEQNILWVNPDcGLK	Q9SRV5;O50008	2	2	CID	C16(Carbamidomethyl)	106.482	4.80451	1	1	3.25596e+06	2	1107.52	2214.02	396.624	87.4864	31448	31448	MS2	25/54	R_Col_0_2.raw
	LNLPILPTTTIGSFPQTVELR	Q9SRV5;O50008	2	2	CID		96.308	4.69405	1	1	2.25711e+06	2	1155.68	2310.36	22.6352	90.3047	32546	32546	MS2	25/60	R_Col_0_2.raw
	GGIGVIQIDEAALR	Q9SRV5;O50008	2	2	CID		31.5024	4.64045	1	1	2.07639e+06	2	707.091	1413.18	979.847	62.8631	21819	21819	MS2	23/39	R_Col_0_2.raw
	KLNLPILPTTTIGSFPQTVELR	Q9SRV5;O50008	2	2	CID		68.5074	4.61156	1	1	1.56266e+06	2	1219.77	2438.53	51.8637	79.8034	28446	28446	MS2	20/63	R_Col_0_2.raw
	LVVSTScSLLHTAVDLINETK	Q9SRV5;O50008	2	2	CID	C7(Carbamidomethyl)	35.4789	4.58833	1	1	0	3	767.856	2301.55	580.978	82.3703	29450	29450	MS2	37/120	R_Col_0_2.raw
	LVVSTScSLLHTAVDLINETK	Q9SRV5;O50008	2	2	CID	C7(Carbamidomethyl)	78.163	4.56516	1	1	1469377	2	1151.18	2301.36	496.345	82.8412	29635	29635	MS2	24/60	R_Col_0_2.raw
	NIWANDLAASLITLQSLEGVVGK	Q9SRV5	1	1	CID		67.6973	4.52511	0.0224016	1	322499	2	1206.6	2412.19	-49.3167	106.936	39045	39045	MS2	25/66	R_Col_0_2.raw
	GMLTGPVTILNWSFVR	Q9SRV5;O50008	3	2	CID		35.0951	4.27461	1	1	577743	3	598.089	1792.25	720.022	92.6839	33479	33479	MS2	38/90	R_Col_0_2.raw
	KAEHSFYLDWAVHSFR	Q9SRV5	1	1	CID		67.5362	4.22563		2	1.2061e+06	2	997.43	1993.85	442.091	53.0485	17962	17962	MS2	20/45	R_Col_0_2.raw
	MLAVLEQNILWVNPDcGLK	Q9SRV5;O50008	2	2	CID	C16(Carbamidomethyl)	70.2302	4.19585	1	1	1611323	2	1107.43	2213.86	321.369	88.8742	31988	31988	MS2	22/54	R_Col_0_2.raw
	DKLVVSTScSLLHTAVDLINETK	Q9SRV5;O50008	2	2	CID	C9(Carbamidomethyl)	27.7871	3.99971	1	1	2.05394e+06	3	848.761	2544.27	364.998	83.1537	29756	29756	MS2	31/132	R_Col_0_2.raw
	GMLTGPVTILNWSFVR	Q9SRV5;O50008	3	2	CID		65.1306	3.96212	1	1	639826	2	896.678	1792.35	773.765	93.7738	33905	33905	MS2	16/45	R_Col_0_2.raw
	KLNLPILPTTTIGSFPQTVELR	Q9SRV5;O50008	2	2	CID		11.6939	3.95404	1	1	10026545	3	813.593	2438.77	149.016	80.3022	28640	28640	MS2	33/126	R_Col_0_2.raw
	LNLPILPTTTIGSFPQTVELR	Q9SRV5;O50008	2	2	CID		16.0096	3.95175	1	1	1.00052e+06	3	771.092	2311.26	413.592	90.8182	32746	32746	MS2	26/120	R_Col_0_2.raw
	HETcYQIALAIKDEVEDLEK	Q9SRV5;O50008	2	2	CID	C4(Carbamidomethyl)	47.273	3.91903	1	1	2337406	3	801.926	2403.76	-168.733	76.9543	27332	27332	MS2	27/114	R_Col_0_2.raw
	HETcYQIALAIKDEVEDLEK	Q9SRV5;O50008	2	2	CID	C4(Carbamidomethyl)	15.5554	3.84447	1	1	21905.5	3	802.51	2405.51	558.899	124.231	45157	45157	MS2	22/114	R_Col_0_2.raw
	MLAVLEQNILWVNPDcGLK	Q9SRV5;O50008	2	2	CID	C16(Carbamidomethyl)	3.883	3.78914	1	1	1.85214e+06	3	738.758	2214.26	503.59	88.8283	31970	31970	MS2	30/108	R_Col_0_2.raw
	GGIGVIQIDEAALR	Q9SRV5;O50008	2	2	CID		39.8718	3.77501	1	1	2.3087e+06	2	706.425	1411.84	36.3617	62.9547	21855	21855	MS2	22/39	R_Col_0_2.raw
	SFDLLSLLPK	Q9SRV5	1	1	CID		29.4908	3.73728	1	1	1.39126e+06	2	566.838	1132.67	7.43445	89.8464	32367	32367	MS2	19/27	R_Col_0_2.raw
	KLNLPILPTTTIGSFPQTVELR	Q9SRV5;O50008	2	2	CID		61.1725	3.73263	1	1	476438	2	1220.27	2439.53	461.766	81.1844	28986	28986	MS2	21/63	R_Col_0_2.raw
	WFDTNYHYIVPELGPEVK	Q9SRV5	1	1	CID		32.2314	3.66333	1	1	1328444	2	1104.1	2207.19	49.6756	71.8946	25355	25355	MS2	22/51	R_Col_0_2.raw
	MLAVLEQNILWVNPDcGLK	Q9SRV5;O50008	2	2	CID	C16(Carbamidomethyl)	46.687	3.64743	1	1	21455.3	2	1107.68	2214.36	547.1	125.394	45535	45535	MS2	15/54	R_Col_0_2.raw
	AEHSFYLDWAVHSFR	Q9SRV5	1	1	CID		63.4815	3.55077	0.0120907	1	974507	2	933.429	1865.85	521.992	61.3222	21219	21219	MS2	22/42	R_Col_0_2.raw
	HETcYQIALAIKDEVEDLEK	Q9SRV5;O50008	2	2	CID	C4(Carbamidomethyl)	73.9676	3.5102	1	1	1.07239e+06	2	1202.02	2403.03	-475.462	76.1005	27000	27000	MS2	19/57	R_Col_0_2.raw
	MLAVLEQNILWVNPDcGLK	Q9SRV5;O50008	2	2	CID	C16(Carbamidomethyl)	20.4709	3.50042	1	1	18762.2	2	1107.43	2213.86	321.369	127.318	46158	46158	MS2	16/54	R_Col_0_2.raw
	GMLTGPVTILNWSFVR	Q9SRV5;O50008	3	2	CID		4.43907	3.4665	1	1	1.2831e+06	2	896.012	1791.02	29.8699	94.2644	34096	34096	MS2	13/45	R_Col_0_2.raw
	MLAVLEQNILWVNPDcGLK	Q9SRV5;O50008	2	2	CID	C16(Carbamidomethyl)	1.26631	3.36797	1	1	120483	2	1107.68	2214.36	547.1	113.393	41494	41494	MS2	16/54	R_Col_0_2.raw
	YLFAGVVDGR	Q9SRV5;O50008	2	2	CID		45.0329	3.3151	1	1	14620544	2	548.838	1096.67	82.4264	50.1789	16832	16832	MS2	21/27	R_Col_0_2.raw
	FALESFWDGK	Q9SRV5;O50008	3	2	CID		30.6859	3.30996	1	1	4.02115e+06	2	600.256	1199.5	-57.4181	69.8512	24554	24554	MS2	20/27	R_Col_0_2.raw
	GGIGVIQIDEAALR	Q9SRV5;O50008	2	2	CID		17.6705	3.18965	1	1	20677.7	2	707.008	1413.01	862.009	128.15	46429	46429	MS2	20/39	R_Col_0_2.raw
	FALESFWDGK	Q9SRV5;O50008	3	2	CID		39.5887	3.12452	1	1	2.6061e+06	2	600.839	1200.67	914.335	71.4113	25166	25166	MS2	19/27	R_Col_0_2.raw
	GGIGVIQIDEAALR	Q9SRV5;O50008	2	2	CID		45.4686	2.97638	1	1	944466	1	1411.69	1411.69	-72.4474	61.7332	21380	21380	MS2	19/39	R_Col_0_2.raw
P83484	61.15	39	556	59.6761	6.62451	397.841	ATP synthase subunit beta-2, mitochondrial OS=Arabidopsis thaliana GN=At5g08690 PE=1 SV=1 - [ATPBN_ARATH]
	Sequence	Protein Accessions	# Proteins	# Protein Groups	Activation Type	Modifications	Probability	XCorr	Δ Score	Rank	Intensity	Charge	m/z [Da]	MH+ [Da]	ΔM [ppm]	RT [min]	First Scan	Last Scan	MS Order	Ions Matched	Spectrum File	Annotation
	DAPALVDLATGQEILATGIK	P83484	3	1	CID		103.024	6.22394	1	1	3.41139e+06	2	998.93	1996.85	379.037	87.4397	31430	31430	MS2	25/57	R_Col_0_2.raw
	DAPALVDLATGQEILATGIK	P83484	3	1	CID		107.335	5.77624	1	1	7.80416e+06	2	998.597	1996.19	45.1873	87.858	31592	31592	MS2	30/57	R_Col_0_2.raw
	IPSAVGYQPTLASDLGALQER	P83484	3	1	CID		121.664	5.63866	1	1	6263741	2	1093.6	2186.19	20.5002	69.2537	24320	24320	MS2	32/60	R_Col_0_2.raw
	FTQANSEVSALLGR	P83484	3	1	CID		65.2238	5.17207	1	1	8176596	2	747.425	1493.84	714.843	52.9733	17930	17930	MS2	23/39	R_Col_0_2.raw
	KGSITSVQAIYVPADDLTDPAPATTFAHLDATTVLSR	P83484	3	1	CID		11.0435	5.16213	0.0348119	1	1.42667e+06	3	1281.69	3843.04	15.9162	78.9799	28124	28124	MS2	34/216	R_Col_0_2.raw
	FTQANSEVSALLGR	P83484	3	1	CID		85.4648	5.10356	1	1	9034033	2	746.925	1492.84	45.4459	52.9756	17931	17931	MS2	25/39	R_Col_0_2.raw
	DAEGQDVLLFIDNIFR	P83484	3	1	CID		66.4422	5.04945	1	1	241909	3	622.673	1866	568.122	107.491	39260	39260	MS2	38/90	R_Col_0_2.raw
	DAEGQDVLLFIDNIFR	P83484	3	1	CID		76.9482	4.91934	1	1	2.05068e+06	2	933.512	1866.02	575.117	107.399	39224	39224	MS2	23/45	R_Col_0_2.raw
	QISELGIYPAVDPLDSTSR	P83484	3	1	CID		59.1464	4.88519	1	1	3.82596e+06	2	1031.01	2061.02	-14.0515	71.4621	25186	25186	MS2	23/54	R_Col_0_2.raw
	DAEGQDVLLFIDNIFR	P83484	3	1	CID		66.8429	4.63768	1	1	271046	2	933.096	1865.18	128.582	108.847	39782	39782	MS2	23/45	R_Col_0_2.raw
	TVLIMELINNVAK	P83484	3	1	CID		58.8159	4.61772	1	1	4456113	2	729.425	1457.84	2.04186	89.2903	32150	32150	MS2	25/36	R_Col_0_2.raw
	TVLIMELINNVAK	P83484	3	1	CID		49.3019	4.55246	1	1	2589095	2	729.508	1458.01	116.355	87.8118	31574	31574	MS2	23/36	R_Col_0_2.raw
	NLQDIIAILGMDELSEDDKLTVAR	P83484	3	1	CID		65.7983	4.53485	1	1	464803	2	1337.35	2673.7	493.042	98.0245	35562	35562	MS2	19/69	R_Col_0_2.raw
	cALVYGQMNEPPGAR	P83484	3	1	CID	C1(Carbamidomethyl)	81.2607	4.51745	1	1	6.68027e+06	2	832.427	1663.85	645.43	37.1433	11685	11685	MS2	23/42	R_Col_0_2.raw
	DAPALVDLATGQEILATGIK	P83484	3	1	CID		65.7964	4.5075	1	1	2.97188e+06	3	666.34	1997.01	455.928	88.5982	31880	31880	MS2	41/114	R_Col_0_2.raw
	MLSPHILGEEHYNTAR	P83484	3	1	CID		63.0057	4.48885	1	1	1.3906e+06	2	934.512	1868.02	56.3468	30.9806	9248	9248	MS2	26/45	R_Col_0_2.raw
	IPSAVGYQPTLASDLGALQER	P83484	3	1	CID		80.1622	4.41342	1	1	6452216	3	729.758	2187.26	509.821	69.2075	24302	24302	MS2	33/120	R_Col_0_2.raw
	LVLEVSHHLGQNVVR	P83484	3	1	CID		77.8757	4.33851	1	1	3.48106e+06	2	850.511	1700.01	31.6099	33.3719	10194	10194	MS2	23/42	R_Col_0_2.raw
	IMNVLGEPIDER	P83484	3	1	CID		20.9023	4.25153	1	1	6931770	2	693.424	1385.84	95.1509	51.1865	17228	17228	MS2	21/33	R_Col_0_2.raw
	YDDLSEQSFYMVGGIDEVVAK	P83484	3	1	CID		39.5225	4.24987	1	1	904622	2	1183.68	2366.36	536.57	81.3893	29066	29066	MS2	21/60	R_Col_0_2.raw
	VcQVIGAIVDVR	P83484	3	1	CID	C2(Carbamidomethyl)	28.4299	4.18159	1	1	5739000	2	665.34	1329.67	705.412	54.0665	18362	18362	MS2	21/33	R_Col_0_2.raw
	QISELGIYPAVDPLDSTSR	P83484	3	1	CID		13.5698	3.9347	1	1	2.40897e+06	3	687.757	2061.26	100.902	71.6914	25275	25275	MS2	30/108	R_Col_0_2.raw
	ENINSFQGLLDGK	P83484	3	1	CID		38.2311	3.87583	1	1	2.88551e+06	2	717.841	1434.68	-32.6541	58.4978	20109	20109	MS2	18/36	R_Col_0_2.raw
	TVLIMELINNVAK	P83484	3	1	CID		49.0019	3.86538	1	1	921488	2	729.425	1457.84	2.04186	92.0304	33222	33222	MS2	19/36	R_Col_0_2.raw
	NLQDIIAILGMDELSEDDKLTVAR	P83484	3	1	CID		50.5349	3.83157	1	1	947147	2	1336.52	2672.03	-130.407	96.3086	34893	34893	MS2	18/69	R_Col_0_2.raw
	TIAMDGTEGLVR	P83484	3	1	CID		49.7145	3.80997	1	1	11567110	2	631.84	1262.67	24.7374	39.7292	12710	12710	MS2	23/33	R_Col_0_2.raw
	FEDQEGLPPIMTSLEVQDHPTR	P83484	3	1	CID		70.6036	3.75357	1	1	833552	2	1270.52	2540.03	321.577	67.2154	23523	23523	MS2	22/63	R_Col_0_2.raw
	QISELGIYPAVDPLDSTSR	P83484	3	1	CID		7.10732	3.72678	1	1	1.08993e+06	2	1031.76	2062.52	713.238	71.1528	25066	25066	MS2	18/54	R_Col_0_2.raw
	VGLTGLTVAEYFR	P83484	3	1	CID		24.4372	3.71221	1	1	3860801	2	713.925	1426.84	748.763	74.366	26318	26318	MS2	20/36	R_Col_0_2.raw
	TVLIMELINNVAK	P83484	3	1	CID		1	3.62113	1	1	925757	2	730.092	1459.18	915.815	91.6977	33090	33090	MS2	15/36	R_Col_0_2.raw
	VVDLLAPYQR	P83484	3	1	CID		39.5783	3.61761	1	1	13254386	2	587.422	1173.84	148.652	50.4964	16958	16958	MS2	20/27	R_Col_0_2.raw
	VGLTGLTVAEYFR	P83484	3	1	CID		56.8537	3.57257	1	1	5.11515e+06	2	713.508	1426.01	164.808	72.8384	25724	25724	MS2	20/36	R_Col_0_2.raw
	DAPALVDLATGQEILATGIK	P83484	3	1	CID		38.3153	3.46812	1	1	1.20433e+06	2	998.93	1996.85	379.037	89.8749	32379	32379	MS2	18/57	R_Col_0_2.raw
	IGLFGGAGVGK	P83484;P19366	4	2	CID		25.1381	3.33253	1	1	8849283	2	488.337	975.667	107.018	42.0582	13628	13628	MS2	22/30	R_Col_0_2.raw
	cALVYGQMNEPPGAR	P83484	3	1	CID	C1(Carbamidomethyl)	24.9211	3.30945	1	1	2420293	2	832.01	1663.01	144.646	38.0611	12051	12051	MS2	20/42	R_Col_0_2.raw
	ENINSFQGLLDGK	P83484	3	1	CID		37.633	3.27318	1	1	1.11402e+06	2	718.008	1435.01	199.645	58.2748	20020	20020	MS2	17/36	R_Col_0_2.raw
	VcQVIGAIVDVR	P83484	3	1	CID	C2(Carbamidomethyl)	3.51035	3.23004	1	1	1.37123e+06	2	665.09	1329.17	329.496	57.3108	19640	19640	MS2	19/33	R_Col_0_2.raw
	FEDQEGLPPIMTSLEVQDHPTR	P83484	3	1	CID		50.4736	3.19057	1	1	635408	2	1270.77	2540.53	518.326	66.988	23435	23435	MS2	20/63	R_Col_0_2.raw
	IMNVLGEPIDERGEIK	P83484	3	1	CID		2.99032	3.17399	1	1	835313	2	907.595	1814.18	678.196	48.2376	16069	16069	MS2	15/45	R_Col_0_2.raw
P22953	45.01	31	651	71.3131	5.12256	387.929	Probable mediator of RNA polymerase II transcription subunit 37e OS=Arabidopsis thaliana GN=MED37E PE=1 SV=3 - [MD37E_ARATH]
	Sequence	Protein Accessions	# Proteins	# Protein Groups	Activation Type	Modifications	Probability	XCorr	Δ Score	Rank	Intensity	Charge	m/z [Da]	MH+ [Da]	ΔM [ppm]	RT [min]	First Scan	Last Scan	MS Order	Ions Matched	Spectrum File	Annotation
	KIEDSIEQAIQWLEGNQLAEADEFEDK	P22953	1	1	CID		114.181	6.08995	1	1	1.27348e+06	3	1050.43	3149.28	248.672	99.8876	36290	36290	MS2	40/156	R_Col_0_2.raw
	SINPDEAVAYGAAVQGAILSGEGNEK	P22953	1	1	CID		101.709	5.29714	1	1	1.2988e+06	2	1280.6	2560.2	-21.6229	77.5951	27583	27583	MS2	28/75	R_Col_0_2.raw
	VQDLLLLDVTPLSLGLETAGGVMTTLIPR	P22953	1	1	CID		87.6086	5.20525	1	1	269670	3	1012.93	3036.78	352.533	114.372	41852	41852	MS2	36/168	R_Col_0_2.raw
	IINEPTAAAIAYGLDK	O65719;Q39043;P22953;P22954;Q9LKR3;Q9LHA8;Q9S9N1	8	7	CID		84.2489	5.13011	1	1	5.22165e+06	2	830.51	1660.01	71.0558	59.3723	20451	20451	MS2	26/45	R_Col_0_2.raw
	SINPDEAVAYGAAVQGAILSGEGNEK	P22953	1	1	CID		80.6763	5.11928	0.326962	1	1.06313e+06	2	1281.19	2561.36	433.882	77.3756	27497	27497	MS2	24/75	R_Col_0_2.raw
	ATAGDTHLGGEDFDNR	O65719;P22953;P22954;Q9LHA8;Q9S9N1	6	5	CID		53.6605	5.01199	1	1	1.24463e+06	2	838.844	1676.68	566.287	21.8919	5636	5636	MS2	28/45	R_Col_0_2.raw
	IINEPTAAAIAYGLDKK	O65719;Q39043;P22953;P22954;Q9LKR3;Q9LHA8;Q9S9N1	8	7	CID		123.669	4.88969	1	1	2.91145e+06	2	895.012	1789.02	573.208	49.5855	16599	16599	MS2	25/48	R_Col_0_2.raw
	KIEDSIEQAIQWLEGNQLAEADEFEDKMK	P22953	1	1	CID		75.6224	4.87444	1	1	616234	3	1136.6	3407.78	44.7999	97.6911	35432	35432	MS2	33/168	R_Col_0_2.raw
	DAGVIAGLNVMR	O65719;P22953	2	2	CID		46.4318	4.84083	1	1	4468123	2	608.839	1216.67	838.218	57.7197	19802	19802	MS2	22/33	R_Col_0_2.raw
	MYQGAGGEAGGPGASGMDDDAPPASGGAGPK	P22953	1	1	CID		81.1723	4.83079	1	1	1.53302e+06	2	1367.69	2734.37	444.577	31.1155	9302	9302	MS2	29/90	R_Col_0_2.raw
	IINEPTAAAIAYGLDK	O65719;Q39043;P22953;P22954;Q9LKR3;Q9LHA8;Q9S9N1	8	7	CID		75.6109	4.71612	1	1	4.01913e+06	2	831.01	1661.01	673.067	59.1415	20361	20361	MS2	27/45	R_Col_0_2.raw
	VQQLLQDFFNGK	P22953;P22954;Q9LHA8	4	3	CID		44.9585	4.64486	1	1	8478826	2	719.425	1437.84	757.371	67.8318	23762	23762	MS2	17/33	R_Col_0_2.raw
	DAGVIAGLNVMR	O65719;P22953	2	2	CID		44.9369	4.63066	1	1	3.09966e+06	2	608.423	1215.84	153.381	57.8132	19839	19839	MS2	24/33	R_Col_0_2.raw
	NQVAMNPVNTVFDAK	P22953;P22954	3	2	CID		72.174	4.61751	1	1	8237955	2	824.427	1647.85	18.4129	52.9266	17912	17912	MS2	24/42	R_Col_0_2.raw
	EQVFSTYSDNQPGVLIQVYEGER	O65719;P22953	2	2	CID		36.3131	4.25681	1	1	968295	2	1329.6	2658.2	-25.9851	74.6456	26428	26428	MS2	18/66	R_Col_0_2.raw
	IINEPTAAAIAYGLDKK	O65719;Q39043;P22953;P22954;Q9LKR3;Q9LHA8;Q9S9N1	8	7	CID		92.1325	4.09602	1	1	768235	2	894.011	1787.02	-545.356	49.6154	16612	16612	MS2	22/48	R_Col_0_2.raw
	IEDSIEQAIQWLEGNQLAEADEFEDKMK	P22953	1	1	CID		67.5976	3.90189	1	1	435826	3	1093.77	3279.28	-77.7143	98.6352	35801	35801	MS2	31/162	R_Col_0_2.raw
	ELESIcNPIIAK	O65719;P22953	2	2	CID	C6(Carbamidomethyl)	6.14438	3.74984	1	1	4.73358e+06	2	694.424	1387.84	800.898	47.4376	15752	15752	MS2	21/33	R_Col_0_2.raw
	EQVFSTYSDNQPGVLIQVYEGER	O65719;P22953	2	2	CID		48.9245	3.56818	1	1	1.13001e+06	2	1329.69	2658.37	36.7129	73.2259	25876	25876	MS2	22/66	R_Col_0_2.raw
	NALENYAYNMR	O65719;P22953;P22954;Q9LHA8	4	4	CID		48.6147	3.47981	1	1	19917168	2	679.924	1358.84	165.547	40.9153	13178	13178	MS2	20/30	R_Col_0_2.raw
	DAGVIAGLNVMR	O65719;P22953	2	2	CID		59.2699	3.41321	1	1	688145	2	607.839	1214.67	-806.97	57.9776	19904	19904	MS2	21/33	R_Col_0_2.raw
	MVNHFVQEFK	O65719;P22953;P22954;Q9LHA8	5	4	CID		37.601	3.35278	1	1	8356746	2	640.34	1279.67	814.696	29.3605	8606	8606	MS2	22/27	R_Col_0_2.raw
	STVHDVVLVGGSTR	P22953	1	1	CID		45.0785	3.31917	1	1	385829	1	1426.69	1426.69	-53.6017	24.4146	6639	6639	MS2	18/39	R_Col_0_2.raw
	MKELESIcNPIIAK	O65719;P22953	2	2	CID	C8(Carbamidomethyl)	22.4147	3.26685	1	1	1.14678e+06	2	823.427	1645.85	-11.5205	41.8054	13530	13530	MS2	16/39	R_Col_0_2.raw
	TTPSYVAFTDSER	O65719;P22953;P22954;Q9LHA8	5	4	CID		46.5736	3.25806	1	1	7524455	2	737.925	1474.84	784.718	37.5514	11847	11847	MS2	19/36	R_Col_0_2.raw
	MVNHFVQEFK	O65719;P22953;P22954;Q9LHA8	5	4	CID		29.9	3.2108	1	1	9270648	2	639.84	1278.67	33.2569	29.5402	8678	8678	MS2	21/27	R_Col_0_2.raw
	NALENYAYNMR	O65719;P22953;P22954;Q9LHA8	4	4	CID		30.4686	3.20822	1	1	5344561	2	680.424	1359.84	900.82	40.368	12962	12962	MS2	17/30	R_Col_0_2.raw
	KIEDSIEQAIQWLEGNQLAEADEFEDK	P22953	1	1	CID		1	3.20462	1	1	758050	2	1575.02	3149.04	173.447	100.001	36335	36335	MS2	16/78	R_Col_0_2.raw
	EIAEAYLGVTIK	P22953	1	1	CID		2.7409	3.14951	1	1	22920.6	2	654.59	1308.17	1106.7	116.783	42709	42709	MS2	16/33	R_Col_0_2.raw
	FSDSSVQSDMK	P22953	1	1	CID		55.2401	3.13636	1	1	1.51664e+06	2	616.256	1231.5	791.069	22.6255	5924	5924	MS2	17/30	R_Col_0_2.raw
	VQDLLLLDVTPLSLGLETAGGVMTTLIPR	P22953	1	1	CID		44.1715	3.13234	1	1	93913.4	2	1518.19	3035.37	-109.73	114.101	41754	41754	MS2	25/84	R_Col_0_2.raw
Q8GTY0	30.29	33	449	49.4708	9.11475	373.979	Elongation factor 1-alpha 4 OS=Arabidopsis thaliana GN=A4 PE=1 SV=2 - [EF1A4_ARATH]
	Sequence	Protein Accessions	# Proteins	# Protein Groups	Activation Type	Modifications	Probability	XCorr	Δ Score	Rank	Intensity	Charge	m/z [Da]	MH+ [Da]	ΔM [ppm]	RT [min]	First Scan	Last Scan	MS Order	Ions Matched	Spectrum File	Annotation
	FHINIVVIGHVDSGK	Q8GTY0	1	1	CID		48.5381	4.94127	1	1	21821.2	2	818.427	1635.85	577.523	125.158	45458	45458	MS2	26/42	R_Col_0_2.raw
	VETGMIKPGMVVTFAPTGLTTEVK	Q8GTY0	1	1	CID		47.5167	4.80055	1	1	656988	2	1254.27	2507.53	478.537	68.5894	24061	24061	MS2	24/69	R_Col_0_2.raw
	VETGMIKPGMVVTFAPTGLTTEVK	Q8GTY0	1	1	CID		56.1497	4.56265	1	1	1.23891e+06	2	1254.02	2507.03	279.189	68.7513	24122	24122	MS2	25/69	R_Col_0_2.raw
	FHINIVVIGHVDSGK	Q8GTY0	1	1	CID		59.2459	4.29973	1	1	32787	2	818.343	1635.68	475.686	123.272	44846	44846	MS2	28/42	R_Col_0_2.raw
	FHINIVVIGHVDSGK	Q8GTY0	1	1	CID		36.5534	4.28693	1	1	18762.8	2	818.01	1635.01	68.128	130.539	47208	47208	MS2	22/42	R_Col_0_2.raw
	FHINIVVIGHVDSGK	Q8GTY0	1	1	CID		58.1812	4.21547	1	1	25894.2	2	818.593	1636.18	781.136	119.517	43612	43612	MS2	21/42	R_Col_0_2.raw
	VETGMIKPGMVVTFAPTGLTTEVK	Q8GTY0	1	1	CID		42.1808	4.2114	1	1	19778782	3	836.427	2507.27	373.666	69.0724	24248	24248	MS2	44/138	R_Col_0_2.raw
	FHINIVVIGHVDSGK	Q8GTY0	1	1	CID		57.3757	4.20675	1	1	23801.2	2	818.177	1635.35	271.948	121.239	44178	44178	MS2	25/42	R_Col_0_2.raw
	FHINIVVIGHVDSGK	Q8GTY0	1	1	CID		63.4679	4.19948	1	1	30562.5	2	818.51	1636.01	679.34	128.73	46618	46618	MS2	21/42	R_Col_0_2.raw
	EHALLAFTLGVK	Q8GTY0	1	1	CID		15.7514	4.19158	1	1	968482	3	434.086	1300.24	1150.91	57.1911	19594	19594	MS2	33/66	R_Col_0_2.raw
	FHINIVVIGHVDSGK	Q8GTY0	1	1	CID		50.1211	4.12594	1	1	49719.7	2	818.26	1635.51	373.828	116.219	42513	42513	MS2	23/42	R_Col_0_2.raw
	VETGmIKPGmVVTFAPTGLTTEVK	Q8GTY0	1	1	CID	M5(Oxidation) M10(Oxidation)	1	4.11728	0.0881236	1	1.9628e+06	3	847.011	2539.02	274.778	69.7163	24501	24501	MS2	37/138	R_Col_0_2.raw
	VETGMIKPGMVVTFAPTGLTTEVK	Q8GTY0	1	1	CID		42.4473	4.11673	1	1	388426	2	1253.69	2506.36	13.2688	70.1339	24666	24666	MS2	22/69	R_Col_0_2.raw
	EHALLAFTLGVK	Q8GTY0	1	1	CID		8.49573	4.11535	1	1	818447	3	433.669	1298.99	189.717	55.7811	19038	19038	MS2	32/66	R_Col_0_2.raw
	FHINIVVIGHVDSGK	Q8GTY0	1	1	CID		38.958	3.95529	1	1	107760	3	545.588	1634.75	-92.7815	111.337	40730	40730	MS2	33/84	R_Col_0_2.raw
	EHALLAFTLGVK	Q8GTY0	1	1	CID		37.3582	3.85421	1	1	353273	3	433.753	1299.24	382.104	58.3514	20052	20052	MS2	31/66	R_Col_0_2.raw
	NMITGTSQADcAVLIIDSTTGGFEAGISK	Q8GTY0	1	1	CID	C11(Carbamidomethyl)	54.5024	3.84965	1	1	688529	2	1479.69	2958.37	320.607	87.558	31477	31477	MS2	19/84	R_Col_0_2.raw
	YYcTVIDAPGHR	Q8GTY0	1	1	CID	C3(Carbamidomethyl)	39.7342	3.83264	1	1	13215163	2	726.425	1451.84	116.34	25.7415	7166	7166	MS2	18/33	R_Col_0_2.raw
	VETGmIKPGMVVTFAPTGLTTEVK	Q8GTY0	1	1	CID	M5(Dioxidation)	1	3.75445		2	1.9628e+06	3	847.011	2539.02	274.778	69.7163	24501	24501	MS2	38/138	R_Col_0_2.raw
	IGGIGTVPVGR	Q8GTY0	1	1	CID		13.8803	3.70344	1	1	47155204	2	513.337	1025.67	55.9355	32.8619	9992	9992	MS2	22/30	R_Col_0_2.raw
	FHINIVVIGHVDSGK	Q8GTY0	1	1	CID		60.3266	3.5451	1	1	16935.7	2	817.76	1634.51	-237.759	132.752	47931	47931	MS2	22/42	R_Col_0_2.raw
	NMITGTSQADcAVLIIDSTTGGFEAGISK	Q8GTY0	1	1	CID	C11(Carbamidomethyl)	31.1567	3.53325	1	1	36323.4	2	1479.69	2958.37	320.607	117.968	43103	43103	MS2	17/84	R_Col_0_2.raw
	FHINIVVIGHVDSGK	Q8GTY0	1	1	CID		32.6891	3.51815	1	1	46896.6	2	817.427	1633.85	-645.899	126.361	45849	45849	MS2	20/42	R_Col_0_2.raw
	YDEIIKEVSSYLK	Q8GTY0	1	1	CID		18.7637	3.50923	1	1	622664	2	794.51	1588.01	743.44	69.189	24296	24296	MS2	17/36	R_Col_0_2.raw
	MTPTKPMVVETFSEYPPLGR	Q8GTY0	1	1	CID		81.5479	3.38633	1	1	1.29148e+06	2	1141.1	2281.19	460.954	58.8749	20257	20257	MS2	18/57	R_Col_0_2.raw
	MTPTKPMVVETFSEYPPLGR	Q8GTY0	1	1	CID		300	3.34063	1	1	3.78261e+06	2	1141.1	2281.19	460.954	60.3347	20830	20830	MS2	23/57	R_Col_0_2.raw
	NMITGTSQADcAVLIIDSTTGGFEAGISK	Q8GTY0	1	1	CID	C11(Carbamidomethyl)	7.99258	3.32649	1	1	24363.3	2	1479.52	2958.04	207.954	120.207	43838	43838	MS2	17/84	R_Col_0_2.raw
	EHALLAFTLGVK	Q8GTY0	1	1	CID		25.2672	3.29946	1	1	2.70707e+06	2	649.84	1298.67	-56.8569	57.3583	19659	19659	MS2	17/33	R_Col_0_2.raw
	VETGMIKPGMVVTFAPTGLTTEVK	Q8GTY0	1	1	CID		68.0575	3.24817	1	1	301389	2	1253.52	2506.03	-119.745	70.256	24714	24714	MS2	23/69	R_Col_0_2.raw
	IGGIGTVPVGR	Q8GTY0	1	1	CID		35.3782	3.23757	1	1	604494	2	512.671	1024.33	-1245.68	33.0006	10047	10047	MS2	25/30	R_Col_0_2.raw
	EHALLAFTLGVK	Q8GTY0	1	1	CID		9.56911	3.20199	1	1	17874.2	2	650.34	1299.67	712.626	125.188	45468	45468	MS2	17/33	R_Col_0_2.raw
	EHALLAFTLGVK	Q8GTY0	1	1	CID		14.2348	3.1954	1	1	24075	2	650.507	1300.01	968.857	122.959	44744	44744	MS2	18/33	R_Col_0_2.raw
	MTPTKPMVVETFSEYPPLGR	Q8GTY0	1	1	CID		38.941	3.18439	1	1	0	2	1140.44	2279.88	-115.961	58.8911	20264	20264	MS2	17/57	R_Col_0_2.raw
Q9ASR1	40.93	32	843	93.8302	6.25244	370.553	Elongation factor 2 OS=Arabidopsis thaliana GN=LOS1 PE=1 SV=1 - [EF2_ARATH]
	Sequence	Protein Accessions	# Proteins	# Protein Groups	Activation Type	Modifications	Probability	XCorr	Δ Score	Rank	Intensity	Charge	m/z [Da]	MH+ [Da]	ΔM [ppm]	RT [min]	First Scan	Last Scan	MS Order	Ions Matched	Spectrum File	Annotation
	STLTDSLVAAAGIIAQEVAGDVR	Q9ASR1	1	1	CID		89.3432	5.9884	1	1	363218	2	1129.02	2257.02	-79.1969	110.641	40466	40466	MS2	30/66	R_Col_0_2.raw
	AYLPVVESFGFSSQLR	Q9ASR1	2	1	CID		83.4802	5.10188	1	1	8646766	2	900.928	1800.85	508.966	79.1046	28172	28172	MS2	26/45	R_Col_0_2.raw
	AYLPVVESFGFSSQLR	Q9ASR1	2	1	CID		88.7426	4.97074	1	1	6214460	2	900.512	1800.02	46.2337	79.2907	28245	28245	MS2	27/45	R_Col_0_2.raw
	STLTDSLVAAAGIIAQEVAGDVR	Q9ASR1	1	1	CID		61.5038	4.92572	1	1	143682	2	1129.77	2258.52	585.019	109.324	39965	39965	MS2	32/66	R_Col_0_2.raw
	LLEPVYMVEIQAPEGALGGIYSVLNQK	Q9ASR1	2	1	CID		7.84209	4.81069	1	1	660064	2	1466.77	2932.54	335.585	99.4349	36113	36113	MS2	27/78	R_Col_0_2.raw
	RQETVEDVPcGNTVAMVGLDQFITK	Q9ASR1	1	1	CID	C10(Carbamidomethyl)	77.7628	4.6334	1	1	655852	2	1404.77	2808.54	414.833	71.2587	25108	25108	MS2	28/72	R_Col_0_2.raw
	YRVENLYEGPLDDQYANAIR	Q9ASR1	1	1	CID		13.5361	4.60886	1	1	606637	2	1199.93	2398.86	-125.819	58.1152	19958	19958	MS2	20/57	R_Col_0_2.raw
	NcDPNGPLMLYVSK	Q9ASR1	1	1	CID	C2(Carbamidomethyl)	29.1552	4.42779	1	1	4.41768e+06	2	804.426	1607.85	55.8971	52.6967	17822	17822	MS2	20/39	R_Col_0_2.raw
	IWAFGPETTGPNMVVDMcK	Q9ASR1	1	1	CID	C18(Carbamidomethyl)	89.6728	4.36144	1	1	939676	2	1077.02	2153.02	16.8252	75.8153	26887	26887	MS2	23/54	R_Col_0_2.raw
	RQETVEDVPcGNTVAMVGLDQFITK	Q9ASR1	1	1	CID	C10(Carbamidomethyl)	72.6534	4.32032	1	1	2.78822e+06	3	936.512	2807.52	54.1383	71.1876	25079	25079	MS2	35/144	R_Col_0_2.raw
	NATLTNEKEVDAHPIR	Q9ASR1	1	1	CID		53.0483	4.28009	1	1	41974.9	2	904.428	1807.85	-44.4416	19.2464	4625	4625	MS2	20/45	R_Col_0_2.raw
	VENLYEGPLDDQYANAIR	Q9ASR1	1	1	CID		51.598	4.26023	1	1	0	2	1040.76	2080.51	245.179	60.0437	20718	20718	MS2	20/51	R_Col_0_2.raw
	NATLTNEKEVDAHPIR	Q9ASR1	1	1	CID		88.2232	4.23395	1	1	51778	2	905.178	1809.35	784.639	18.3736	4313	4313	MS2	19/45	R_Col_0_2.raw
	STGISLYYEMTDESLK	Q9ASR1	1	1	CID		1	4.18054	1	1	2.8283e+06	2	918.929	1836.85	-3.9376	67.1902	23512	23512	MS2	18/45	R_Col_0_2.raw
	GVQYLNEIKDSVVAGFQWASK	Q9ASR1	1	1	CID		58.0332	4.16035	1	1	473820	2	1170.68	2340.36	494.204	85.3085	30599	30599	MS2	19/60	R_Col_0_2.raw
	DLQDDFMGGAEIIK	Q9ASR1	1	1	CID		62.7955	4.14013	1	1	4.04395e+06	2	776.426	1551.84	69.8877	71.5042	25202	25202	MS2	22/39	R_Col_0_2.raw
	GHVFEEMQRPGTPLYNIK	Q9ASR1	2	1	CID		54.403	4.12962	1	1	1.74497e+06	2	1058.68	2116.36	137.45	41.8856	13561	13561	MS2	17/51	R_Col_0_2.raw
	ILAEEFGWDKDLAK	Q9ASR1	1	1	CID		67.4721	4.10374	1	1	1.80348e+06	2	817.927	1634.85	2.17158	55.6645	18992	18992	MS2	21/39	R_Col_0_2.raw
	AYLPVVESFGFSSQLR	Q9ASR1	2	1	CID		44.5059	4.06658	1	1	1.15126e+06	2	900.512	1800.02	46.2337	80.7075	28800	28800	MS2	22/45	R_Col_0_2.raw
	IWAFGPETTGPNMVVDMcK	Q9ASR1	1	1	CID	C18(Carbamidomethyl)	71.7188	4.02686	1	1	845177	2	1077.52	2154.02	481.074	77.249	27448	27448	MS2	19/54	R_Col_0_2.raw
	VENLYEGPLDDQYANAIR	Q9ASR1	1	1	CID		70.9629	3.93841	1	1	1.23902e+06	2	1040.35	2079.69	-149.168	61.4487	21269	21269	MS2	22/51	R_Col_0_2.raw
	STLTDSLVAAAGIIAQEVAGDVR	Q9ASR1	1	1	CID		73.5206	3.84225	1	1	258326	3	753.009	2257.01	-84.9837	109.414	39999	39999	MS2	34/132	R_Col_0_2.raw
	QETVEDVPcGNTVAMVGLDQFITK	Q9ASR1	1	1	CID	C9(Carbamidomethyl)	23.0463	3.80039	1	1	919723	2	1326.35	2651.7	162.095	79.9195	28492	28492	MS2	19/69	R_Col_0_2.raw
	AYLPVVESFGFSSQLR	Q9ASR1	2	1	CID		63.2238	3.7735	1	1	1.17815e+06	3	600.589	1799.75	-99.9266	79.6718	28395	28395	MS2	29/90	R_Col_0_2.raw
	DGNEYLINLIDSPGHVDFSSEVTAALR	Q9ASR1	1	1	CID		19.1791	3.75688	1	1	346934	3	978.596	2933.77	457.564	105.844	38620	38620	MS2	25/156	R_Col_0_2.raw
	ILAEEFGWDKDLAKK	Q9ASR1	1	1	CID		25.8034	3.72251	1	1	1.48939e+06	2	882.511	1764.02	610.961	46.2808	15297	15297	MS2	20/42	R_Col_0_2.raw
	VIYASQITAKPR	Q9ASR1	2	1	CID		42.0017	3.49076	1	1	661235	2	674.007	1347.01	169.323	22.4071	5838	5838	MS2	18/33	R_Col_0_2.raw
	VIENANVIMATYEDPLLGDVQVYPEK	Q9ASR1	1	1	CID		81.1242	3.46758	1	1	917651	2	1461.02	2921.04	196.045	86.4323	31037	31037	MS2	23/75	R_Col_0_2.raw
	LWGENFFDPATR	Q9ASR1	1	1	CID		53.4402	3.45145	1	1	6.36914e+06	2	726.925	1452.84	104.526	70.8154	24932	24932	MS2	20/33	R_Col_0_2.raw
	NDEKELMGKPLMK	Q9ASR1	1	1	CID		39.6821	3.42283	1	1	592204	2	766.926	1532.84	41.0396	22.6976	5955	5955	MS2	21/36	R_Col_0_2.raw
	ILAEEFGWDKDLAK	Q9ASR1	1	1	CID		21.5989	3.31086	1	1	1.04368e+06	2	817.76	1634.51	-201.766	56.2245	19212	19212	MS2	18/39	R_Col_0_2.raw
	QIIATcMNDQK	Q9ASR1	1	1	CID	C6(Carbamidomethyl)	1	3.14342	1	1	1.20599e+06	2	661.34	1321.67	37.3938	22.7152	5961	5961	MS2	13/30	R_Col_0_2.raw
O04314	80.2	36	298	32.1383	5.77002	331.472	PYK10-binding protein 1 OS=Arabidopsis thaliana GN=PBP1 PE=1 SV=1 - [JAL30_ARATH]
	Sequence	Protein Accessions	# Proteins	# Protein Groups	Activation Type	Modifications	Probability	XCorr	Δ Score	Rank	Intensity	Charge	m/z [Da]	MH+ [Da]	ΔM [ppm]	RT [min]	First Scan	Last Scan	MS Order	Ions Matched	Spectrum File	Annotation
	VLPADPFVINHPDEHLVSVEGWYSPEGIIQGIK	O04314	1	1	CID		57.9179	5.63501	1	1	1.08637e+06	3	1219.6	3656.79	248.616	85.9548	30852	30852	MS2	39/192	R_Col_0_2.raw
	QLTAFGSDDGTVWDDGAYVGVK	O04314	2	1	CID		97.0548	5.33323	1	1	246013	2	1151.35	2301.69	271.64	70.0399	24630	24630	MS2	23/63	R_Col_0_2.raw
	QLTAFGSDDGTVWDDGAYVGVK	O04314	2	1	CID		71.7257	5.29349	1	1	1129781	2	1151.1	2301.19	54.4159	71.8644	25344	25344	MS2	23/63	R_Col_0_2.raw
	IQLAAGIDGIQYVQFDYVK	O04314	2	1	CID		110.823	5.284	1	1	15424.8	2	1071.6	2142.19	495.487	124.07	45105	45105	MS2	29/54	R_Col_0_2.raw
	IIGFHGSAGGNLNSLGAYFAPLTTTTPLTPAK	O04314	2	1	CID		74.2611	5.26711	1	1	996939	2	1594.86	3188.71	323.24	83.4588	29876	29876	MS2	27/93	R_Col_0_2.raw
	IQLAAGIDGIQYVQFDYVK	O04314	2	1	CID		92.8121	5.16345	1	1	46109.3	2	1071.01	2141.02	-49.1648	120.192	43833	43833	MS2	26/54	R_Col_0_2.raw
	IQLAAGIDGIQYVQFDYVK	O04314	2	1	CID		52.0271	5.10466	1	1	81732.3	2	1071.26	2141.52	184.33	115.54	42273	42273	MS2	28/54	R_Col_0_2.raw
	KVYVGQAQDGISAVK	O04314	3	1	CID		65.1978	5.01598	1	1	640829	2	781.926	1562.84	-5.79226	23.5462	6293	6293	MS2	26/42	R_Col_0_2.raw
	IQLAAGIDGIQYVQFDYVK	O04314	2	1	CID		89.7228	4.88757	1	1	19836.4	2	1071.51	2142.02	417.716	122.206	44494	44494	MS2	30/54	R_Col_0_2.raw
	STLLGFEEFVLDYPSEYITAVDGTYDK	O04314	2	1	CID		44.3413	4.86554	1	1	709527	3	1025.1	3073.28	265.582	105.777	38594	38594	MS2	36/156	R_Col_0_2.raw
	IQLAAGIDGIQYVQFDYVK	O04314	2	1	CID		118.574	4.83797	1	1	28345.3	2	1071.1	2141.19	28.6789	124.727	45318	45318	MS2	27/54	R_Col_0_2.raw
	FVYDKSPEEVTGEEHGK	O04314	3	1	CID		103.46	4.75477	1	1	377870	2	975.93	1950.85	-28.6223	23.1043	6116	6116	MS2	23/48	R_Col_0_2.raw
	IIGFHGSAGGNLNSLGAYFAPLTTTTPLTPAK	O04314	2	1	CID		53.1636	4.72027	1	1	2.4737e+06	3	1063.6	3188.78	345.271	84.6741	30350	30350	MS2	37/186	R_Col_0_2.raw
	QLTAFGSDDGTVWDDGAYVGVK	O04314	2	1	CID		62.1703	4.70297	1	1	2.10102e+06	2	1151.6	2302.19	488.769	71.4183	25169	25169	MS2	22/63	R_Col_0_2.raw
	TSDVIGSDEGTHFTLQVK	O04314	1	1	CID		79.3685	4.68214	1	1	2.39313e+06	2	968.013	1935.02	552.099	45.8949	15143	15143	MS2	27/51	R_Col_0_2.raw
	IQLAAGIDGIQYVQFDYVK	O04314	2	1	CID		29.1587	4.63986	1	1	139862	2	1071.51	2142.02	417.716	109.945	40202	40202	MS2	20/54	R_Col_0_2.raw
	IQLAAGIDGIQYVQFDYVK	O04314	2	1	CID		69.1409	4.58044	1	1	154905	2	1071.26	2141.52	184.33	112.002	40980	40980	MS2	23/54	R_Col_0_2.raw
	GANLWDDGSTHDAVTK	O04314	2	1	CID		41.9082	4.54841	1	1	3.72827e+06	2	843.927	1686.85	44.5897	29.0887	8498	8498	MS2	28/45	R_Col_0_2.raw
	IIGFHGSAGGNLNSLGAYFAPLTTTTPLTPAK	O04314	2	1	CID		49.9915	4.40731	1	1	0	3	1062.99	3186.95	-228.12	83.3093	29817	29817	MS2	36/186	R_Col_0_2.raw
	IQLAAGIDGIQYVQFDYVK	O04314	2	1	CID		46.1514	4.40301	1	1	17089	2	1071.26	2141.52	184.33	126.564	45915	45915	MS2	25/54	R_Col_0_2.raw
	FVYDKSPEEVTGEEHGK	O04314	3	1	CID		89.4531	4.32035	1	1	573680	2	976.513	1952.02	569.078	22.9129	6040	6040	MS2	23/48	R_Col_0_2.raw
	IQLAAGIDGIQYVQFDYVK	O04314	2	1	CID		62.611	4.11098	1	1	241477	2	1071.51	2142.02	417.716	107.683	39334	39334	MS2	19/54	R_Col_0_2.raw
	IQLAAGIDGIQYVQFDYVK	O04314	2	1	CID		70.9205	4.08403	1	1	31901.5	2	1071.01	2141.02	-49.1648	118.316	43218	43218	MS2	24/54	R_Col_0_2.raw
	VYVGQAQDGISAVK	O04314	3	1	CID		43.0156	4.06565	1	1	6313969	2	718.425	1435.84	754.582	32.0904	9686	9686	MS2	23/39	R_Col_0_2.raw
	VYVGQAQDGISAVK	O04314	3	1	CID		65.4409	4.04071	1	1	7.81916e+06	2	717.925	1434.84	58.154	32.0926	9687	9687	MS2	23/39	R_Col_0_2.raw
	TSDVIGSDEGTHFTLQVK	O04314	1	1	CID		50.5878	4.01441	1	1	1.17892e+06	2	967.43	1933.85	-50.8656	47.3248	15709	15709	MS2	25/51	R_Col_0_2.raw
	QTSPPFGLEAGTVFELK	O04314	2	1	CID		50.5138	4.01389	1	1	1.71005e+06	2	911.595	1822.18	680.539	77.08	27381	27381	MS2	17/48	R_Col_0_2.raw
	VYVGQAQDGISAVK	O04314	3	1	CID		65.7799	4.00964	1	1	6.17379e+06	2	717.925	1434.84	58.154	30.7264	9146	9146	MS2	23/39	R_Col_0_2.raw
	KVYVGQAQDGISAVK	O04314	3	1	CID		50.1096	3.80487	1	1	725085	2	781.259	1561.51	-859.687	24.3723	6623	6623	MS2	21/42	R_Col_0_2.raw
	IQLAAGIDGIQYVQFDYVK	O04314	2	1	CID		28.8505	3.78077	1	1	744829	2	1071.51	2142.02	417.716	98.0773	35583	35583	MS2	18/54	R_Col_0_2.raw
	IFGSDGSVITMLR	O04314	3	1	CID		67.4691	3.65069	1	1	8347805	2	698.424	1395.84	79.7566	67.9236	23798	23798	MS2	28/36	R_Col_0_2.raw
	IQLAAGIDGIQYVQFDYVK	O04314	2	1	CID		30.5642	3.57942	1	1	417049	2	1071.76	2142.52	650.992	105.268	38396	38396	MS2	20/54	R_Col_0_2.raw
	IGVHVRPLSN	O04314	2	1	CID		54.9393	3.39562	1	1	3214325	2	546.755	1092.5	796.536	23.122	6122	6122	MS2	19/27	R_Col_0_2.raw
	TSDVIGSDEGTHFTLQVK	O04314	1	1	CID		62.5061	3.24666	1	1	33646.8	2	967.93	1934.85	466.006	126.175	45789	45789	MS2	24/51	R_Col_0_2.raw
	STLLGFEEFVLDYPSEYITAVDGTYDK	O04314	2	1	CID		26.9752	3.13313	1	1	118694	2	1536.94	3072.87	134.27	106.646	38933	38933	MS2	15/78	R_Col_0_2.raw
	IQLAAGIDGIQYVQFDYVK	O04314	2	1	CID		30.6645	3.1331	1	1	1.13347e+06	2	1070.85	2140.69	-204.889	90.5441	32639	32639	MS2	16/54	R_Col_0_2.raw
Q9SRU2	0.29	1	5098	567.527	5.94775	320.351	Auxin transport protein BIG OS=Arabidopsis thaliana GN=BIG PE=1 SV=2 - [BIG_ARATH]
	Sequence	Protein Accessions	# Proteins	# Protein Groups	Activation Type	Modifications	Probability	XCorr	Δ Score	Rank	Intensity	Charge	m/z [Da]	MH+ [Da]	ΔM [ppm]	RT [min]	First Scan	Last Scan	MS Order	Ions Matched	Spectrum File	Annotation
	YSSESEENNLNVSQK	Q9SRU2	1	1	CID		11.3253	3.4782	1	1	105325	2	864.261	1727.51	-148.978	20.2533	5001	5001	MS2	21/42	R_Col_0_2.raw
Q9SRZ6	52.44	27	410	45.7171	6.56592	293.873	Cytosolic isocitrate dehydrogenase [NADP] OS=Arabidopsis thaliana GN=CICDH PE=2 SV=1 - [ICDHC_ARATH]
	Sequence	Protein Accessions	# Proteins	# Protein Groups	Activation Type	Modifications	Probability	XCorr	Δ Score	Rank	Intensity	Charge	m/z [Da]	MH+ [Da]	ΔM [ppm]	RT [min]	First Scan	Last Scan	MS Order	Ions Matched	Spectrum File	Annotation
	DATDDKVTIESAEATKK	Q9SRZ6	1	1	CID		67.6157	5.21326	1	1	69936.9	2	911.512	1822.02	59.6356	18.6786	4421	4421	MS2	24/48	R_Col_0_2.raw
	DATDDKVTIESAEATKK	Q9SRZ6	1	1	CID		44.2465	5.00229	1	1	270166	3	608.256	1822.75	463.92	20.0439	4919	4919	MS2	31/96	R_Col_0_2.raw
	VANPIVEMDGDEMTR	Q9SRZ6	1	1	CID		87.1014	4.98411	1	1	4.3415e+06	2	838.927	1676.85	50.668	49.0836	16401	16401	MS2	25/42	R_Col_0_2.raw
	GGETSTNSIASIFAWTR	Q9SRZ6	1	1	CID		63.4741	4.5899	1	1	4868466	2	899.428	1797.85	-15.2611	77.7696	27650	27650	MS2	21/48	R_Col_0_2.raw
	LEAAcVGTVESGK	Q9SRZ6	1	1	CID	C5(Carbamidomethyl)	65.2616	4.53073	1	1	5052493	2	660.84	1320.67	20.3555	23.3925	6230	6230	MS2	25/36	R_Col_0_2.raw
	DTYLNTEEFIDAVAAELKER	Q9SRZ6	1	1	CID		71.1237	4.48945	1	1	611103	2	1164.6	2328.19	452.103	95.6698	34644	34644	MS2	18/57	R_Col_0_2.raw
	SKYDAAGIWYEHR	Q9SRZ6	1	1	CID		63.9613	4.46461	1	1	2123638	2	798.426	1595.85	53.3735	28.4172	8230	8230	MS2	20/36	R_Col_0_2.raw
	NYDGDVQSDFLAQGFGSLGLMTSVLVcPDGK	Q9SRZ6	1	1	CID	C27(Carbamidomethyl)	27.1087	4.39807	1	1	802694	3	1097.68	3291.03	151.067	105.223	38378	38378	MS2	29/180	R_Col_0_2.raw
	DKLITPFVELDIK	Q9SRZ6	1	1	CID		18.5929	4.37793	1	1	785370	3	511.337	1532	730.979	71.5355	25215	25215	MS2	27/72	R_Col_0_2.raw
	AFADASMNTAYEK	Q9SRZ6	1	1	CID		54.3162	4.24853	1	1	8770386	2	710.425	1419.84	856.582	30.3603	9002	9002	MS2	21/36	R_Col_0_2.raw
	DTYLNTEEFIDAVAAELK	Q9SRZ6	1	1	CID		29.8413	4.23396	1	1	390531	3	681.257	2041.76	-117.038	103.188	37581	37581	MS2	27/102	R_Col_0_2.raw
	DTYLNTEEFIDAVAAELK	Q9SRZ6	1	1	CID		65.7124	4.19036	1	1	563317	2	1021.6	2042.19	93.4156	101.445	36899	36899	MS2	16/51	R_Col_0_2.raw
	NILNGTVFREPIIcK	Q9SRZ6	1	1	CID	C14(Carbamidomethyl)	66.7964	4.17415	1	1	1301322	2	887.928	1774.85	496.219	56.539	19336	19336	MS2	24/42	R_Col_0_2.raw
	LIDDMVAYALK	Q9SRZ6	1	1	CID		39.3755	4.09478	1	1	5203577	2	626.923	1252.84	936.515	66.6767	23312	23312	MS2	22/30	R_Col_0_2.raw
	DTYLNTEEFIDAVAAELK	Q9SRZ6	1	1	CID		71.2455	4.05496	1	1	292236	2	1020.85	2040.69	-641.576	102.801	37429	37429	MS2	21/51	R_Col_0_2.raw
	DATDDKVTIESAEATK	Q9SRZ6	1	1	CID		73.5769	4.01625	1	1	554611	2	847.261	1693.51	-176.472	23.8714	6422	6422	MS2	20/45	R_Col_0_2.raw
	NILNGTVFREPIIcK	Q9SRZ6	1	1	CID	C14(Carbamidomethyl)	28.7518	3.98314	1	1	974715	2	887.428	1773.85	-67.2579	57.0903	19554	19554	MS2	15/42	R_Col_0_2.raw
	DTYLNTEEFIDAVAAELK	Q9SRZ6	1	1	CID		42.7768	3.97819	1	1	402795	3	681.257	2041.76	-117.038	101.761	37023	37023	MS2	26/102	R_Col_0_2.raw
	FKDIFQEVYEASWK	Q9SRZ6	1	1	CID		61.1284	3.93097	1	1	2.5433e+06	2	895.512	1790.02	76.0485	73.8572	26121	26121	MS2	19/39	R_Col_0_2.raw
	SKYDAAGIWYEHR	Q9SRZ6	1	1	CID		4.7808	3.7536	1	1	2.11064e+06	3	532.504	1595.5	-163.725	28.6576	8327	8327	MS2	27/72	R_Col_0_2.raw
	VANPIVEMDGDEmTR	Q9SRZ6	1	1	CID	M13(Oxidation)	52.9854	3.66553	1	1	706055	2	847.011	1693.01	151.816	40.859	13158	13158	MS2	19/42	R_Col_0_2.raw
	DKLITPFVELDIK	Q9SRZ6	1	1	CID		1	3.58539	1	1	2.12833e+06	2	766.509	1532.01	739.497	71.6936	25276	25276	MS2	17/36	R_Col_0_2.raw
	TIEAEAAHGTVTR	Q9SRZ6	2	1	CID		58.6085	3.52729	1	1	28579.9	2	678.841	1356.67	724.281	15.3717	3315	3315	MS2	24/36	R_Col_0_2.raw
	DLALIIHGSK	Q9SRZ6	1	1	CID		40.263	3.30769	1	1	4.27282e+06	2	534.338	1067.67	976.786	36.9157	11595	11595	MS2	18/27	R_Col_0_2.raw
	LIDDMVAYALK	Q9SRZ6	1	1	CID		55.1953	3.30426	1	1	668650	2	625.756	1250.51	-927.686	66.6857	23316	23316	MS2	22/30	R_Col_0_2.raw
	AFADASmNTAYEK	Q9SRZ6	1	1	CID	M7(Oxidation)	15.5345	3.24629	1	1	280328	2	718.341	1435.68	734.801	21.0754	5316	5316	MS2	15/36	R_Col_0_2.raw
	LEAAcVGTVESGK	Q9SRZ6	1	1	CID	C5(Carbamidomethyl)	68.5719	2.83903	1	1	355357	1	1320.69	1320.69	30.244	23.4165	6241	6241	MS2	16/36	R_Col_0_2.raw
Q9FPF0	43.88	24	392	41.831	5.41455	293.314	Protein DJ-1 homolog A OS=Arabidopsis thaliana GN=DJ1A PE=1 SV=1 - [DJ1A_ARATH]
	Sequence	Protein Accessions	# Proteins	# Protein Groups	Activation Type	Modifications	Probability	XCorr	Δ Score	Rank	Intensity	Charge	m/z [Da]	MH+ [Da]	ΔM [ppm]	RT [min]	First Scan	Last Scan	MS Order	Ions Matched	Spectrum File	Annotation
	TVLIPIAHGTEPLEAVAMITVLR	Q9FPF0	1	1	CID		73.1816	5.33983	1	1	4.8141e+06	3	815.843	2445.52	458.274	91.2746	32924	32924	MS2	46/132	R_Col_0_2.raw
	LNAAIccAPALALGTWGLLEGK	Q9FPF0	2	1	CID	C6(Carbamidomethyl) C7(Carbamidomethyl)	69.6457	4.76183	1	1	1.43954e+06	3	767.426	2300.26	464.608	92.2372	33303	33303	MS2	36/126	R_Col_0_2.raw
	LVAEVLLDEVAEK	Q9FPF0	2	1	CID		53.1576	4.73469	1	1	11394466	2	714.508	1428.01	146.698	71.8736	25346	25346	MS2	24/36	R_Col_0_2.raw
	QAEANKPYGGIcASPAYVFEPNGLLK	Q9FPF0	2	1	CID	C12(Carbamidomethyl)	51.6454	4.70244	1	1	993595	3	932.429	2795.27	316.659	65.5935	22888	22888	MS2	33/150	R_Col_0_2.raw
	TVLIPIAHGTEPLEAVAMITVLR	Q9FPF0	1	1	CID		78.283	4.47306	1	1	786035	2	1223.27	2445.53	463.612	90.6072	32664	32664	MS2	28/66	R_Col_0_2.raw
	TVLIPIAHGTEPLEAVAMITVLR	Q9FPF0	1	1	CID		98.3215	4.31869	1	1	586593	2	1222.27	2443.53	-354.513	91.0737	32847	32847	MS2	28/66	R_Col_0_2.raw
	LNAAIccAPALALGTWGLLEGK	Q9FPF0	2	1	CID	C6(Carbamidomethyl) C7(Carbamidomethyl)	51.5916	4.31578	1	1	1.09194e+06	2	1150.02	2299.03	-73.181	92.0211	33218	33218	MS2	23/63	R_Col_0_2.raw
	LNAAIccAPALALGTWGLLEGK	Q9FPF0	2	1	CID	C6(Carbamidomethyl) C7(Carbamidomethyl)	44.4436	4.16476	1	1	829568	3	767.092	2299.26	29.8792	92.2974	33327	33327	MS2	33/126	R_Col_0_2.raw
	ANVVIAAVGNSLEVEGSR	Q9FPF0	2	1	CID		47.8782	4.15538	1	1	792431	2	893.345	1785.68	410.006	61.4579	21273	21273	MS2	20/51	R_Col_0_2.raw
	LVAEVLLDEVAEK	Q9FPF0	2	1	CID		34.7916	3.97518	1	1	42809	2	715.008	1429.01	846.395	117.714	43020	43020	MS2	23/36	R_Col_0_2.raw
	ANVVIAAVGNSLEVEGSR	Q9FPF0	2	1	CID		32.7618	3.96512	1	1	679906	2	893.428	1785.85	503.296	63.7211	22155	22155	MS2	18/51	R_Col_0_2.raw
	APGTAMEFSLAIVEK	Q9FPF0	2	1	CID		46.8274	3.95822	1	1	32092.6	2	782.426	1563.84	22.9671	122.425	44567	44567	MS2	23/42	R_Col_0_2.raw
	APGTAMEFSLAIVEK	Q9FPF0	2	1	CID		38.4469	3.91994	1	1	16297.2	2	782.426	1563.84	22.9671	124.346	45195	45195	MS2	17/42	R_Col_0_2.raw
	APGTAMEFSLAIVEK	Q9FPF0	2	1	CID		42.654	3.90805	1	1	3.27572e+06	2	782.426	1563.84	22.9671	70.8243	24936	24936	MS2	18/42	R_Col_0_2.raw
	RGGADVTVASVETQVGVDAcHGIK	Q9FPF0	2	1	CID	C20(Carbamidomethyl)	1.31983	3.87671	1	1	1.6814e+06	3	809.427	2426.27	22.9284	44.8651	14736	14736	MS2	30/138	R_Col_0_2.raw
	APGTAMEFSLAIVEK	Q9FPF0	2	1	CID		13.5514	3.87167	1	1	1.20575e+06	2	782.426	1563.84	22.9671	79.5008	28328	28328	MS2	18/42	R_Col_0_2.raw
	APGTAMEFSLAIVEK	Q9FPF0	2	1	CID		55.6237	3.77991	1	1	97952.8	2	782.509	1564.01	129.53	115.68	42323	42323	MS2	17/42	R_Col_0_2.raw
	LVAEVLLDEVAEK	Q9FPF0	2	1	CID		49.8985	3.75632	1	1	778218	3	477.003	1429	837.263	71.6282	25251	25251	MS2	33/72	R_Col_0_2.raw
	APGTAMEFSLAIVEK	Q9FPF0	2	1	CID		34.4033	3.74113	1	1	1.93196e+06	2	782.593	1564.18	236.071	72.2047	25475	25475	MS2	18/42	R_Col_0_2.raw
	GPGTTIEFSITLIEQLFGK	Q9FPF0	2	1	CID		50.6559	3.73328	1	1	175209	2	1026.43	2051.85	364.61	111.086	40634	40634	MS2	18/54	R_Col_0_2.raw
	LNAAIccAPALALGTWGLLEGK	Q9FPF0	2	1	CID	C6(Carbamidomethyl) C7(Carbamidomethyl)	82.6806	3.70476	1	1	1.13311e+06	2	1149.68	2298.36	-363.27	92.6603	33469	33469	MS2	25/63	R_Col_0_2.raw
	LAATcATAVESR	Q9FPF0	2	1	CID	C5(Carbamidomethyl)	54.742	3.58868	1	1	108494	2	624.59	1248.17	-1160.6	19.9945	4900	4900	MS2	25/33	R_Col_0_2.raw
	APGTAMEFSLAIVEK	Q9FPF0	2	1	CID		52.4793	3.5113	1	1	634562	2	782.926	1564.84	662.006	70.6379	24861	24861	MS2	16/42	R_Col_0_2.raw
	APGTAMEFSLAIVEK	Q9FPF0	2	1	CID		43.8819	3.32079	1	1	22140.3	2	783.009	1565.01	768.433	129.802	46967	46967	MS2	13/42	R_Col_0_2.raw
O23654	52.49	35	623	68.7688	5.23682	290.343	V-type proton ATPase catalytic subunit A OS=Arabidopsis thaliana GN=VHA-A PE=1 SV=1 - [VATA_ARATH]
	Sequence	Protein Accessions	# Proteins	# Protein Groups	Activation Type	Modifications	Probability	XCorr	Δ Score	Rank	Intensity	Charge	m/z [Da]	MH+ [Da]	ΔM [ppm]	RT [min]	First Scan	Last Scan	MS Order	Ions Matched	Spectrum File	Annotation
	VSGPVVVADGMAGAAMYELVR	O23654	1	1	CID		95.3727	5.99361	1	1	1.47766e+06	2	1046.51	2092.02	-16.7736	85.1907	30552	30552	MS2	31/60	R_Col_0_2.raw
	VSGPVVVADGMAGAAMYELVR	O23654	1	1	CID		40.7987	5.58995	1	1	2.11349e+06	3	698.341	2093.01	454.785	85.4109	30638	30638	MS2	36/120	R_Col_0_2.raw
	VSGPVVVADGMAGAAMYELVR	O23654	1	1	CID		79.3213	5.50017	1	1	749695	2	1047.1	2093.19	540.61	84.6861	30355	30355	MS2	31/60	R_Col_0_2.raw
	GVSVPALDKDcLWEFQPNK	O23654	1	1	CID	C11(Carbamidomethyl)	57.4159	4.74895	1	1	532013	2	1102.77	2204.52	652.5	65.7943	22968	22968	MS2	20/54	R_Col_0_2.raw
	LAEMPADSGYPAYLAAR	O23654	1	1	CID		92.229	4.67873	1	1	3.08062e+06	2	898.928	1796.85	545.841	54.5285	18543	18543	MS2	26/48	R_Col_0_2.raw
	LTTFEDDEKESEYGYVR	O23654	1	1	CID		79.8565	4.42478	1	1	923316	2	1041.43	2081.85	441.96	38.3439	12165	12165	MS2	20/48	R_Col_0_2.raw
	VLDALFPSVLGGTcAIPGAFGcGK	O23654	1	1	CID	C14(Carbamidomethyl) C22(Carbamidomethyl)	16.0692	4.39163	1	1	2.69223e+06	3	803.426	2408.26	435.861	91.2314	32907	32907	MS2	36/138	R_Col_0_2.raw
	YSTALESFYEKFDPDFINIR	O23654	1	1	CID		21.6676	4.20585	1	1	893137	3	818.843	2454.52	-271.397	85.3209	30603	30603	MS2	28/114	R_Col_0_2.raw
	VLDALFPSVLGGTcAIPGAFGcGK	O23654	1	1	CID	C14(Carbamidomethyl) C22(Carbamidomethyl)	53.612	4.08931	1	1	766747	2	1204.18	2407.36	60.6655	90.2273	32516	32516	MS2	20/69	R_Col_0_2.raw
	NIIHFYNLANQAVER	O23654	1	1	CID		67.9895	4.07211	1	1	2.08937e+06	2	901.512	1802.02	45.2494	52.6826	17818	17818	MS2	22/42	R_Col_0_2.raw
	LEGDSATIQVYEETAGLTVNDPVLR	O23654	1	1	CID		45.5966	3.99165	1	1	865876	2	1346.1	2691.2	315.029	80.6481	28776	28776	MS2	20/72	R_Col_0_2.raw
	YSTALESFYEKFDPDFINIR	O23654	1	1	CID		44.8336	3.96597	1	1	1.02668e+06	3	819.427	2456.27	441.273	85.2281	30567	30567	MS2	29/114	R_Col_0_2.raw
	DMGYNVSMMADSTSR	O23654	1	1	CID		31.9647	3.93021	1	1	1.7852e+06	2	832.844	1664.68	5.1725	49.3593	16511	16511	MS2	18/42	R_Col_0_2.raw
	DALAEGDKITLETAK	O23654	1	1	CID		35.4474	3.90481	1	1	2.15364e+06	2	787.426	1573.84	-624.185	35.6905	11110	11110	MS2	23/42	R_Col_0_2.raw
	TTLVANTSNMPVAAR	O23654	1	1	CID		26.619	3.89496	1	1	9004306	2	773.509	1546.01	132.993	35.2296	10928	10928	MS2	24/42	R_Col_0_2.raw
	GNEMAEVLMDFPQLTMTLPDGR	O23654	1	1	CID		40.4069	3.85281	1	1	346012	2	1232.68	2464.36	-320.142	98.1674	35618	35618	MS2	21/63	R_Col_0_2.raw
	VSGPVVVADGMAGAAMYELVR	O23654	1	1	CID		31.3932	3.82036	1	1	765079	2	1047.1	2093.19	540.61	86.6858	31136	31136	MS2	23/60	R_Col_0_2.raw
	GVSVPALDKDcLWEFQPNK	O23654	1	1	CID	C11(Carbamidomethyl)	85.0897	3.76738	1	1	973581	2	1102.1	2203.19	47.6999	66.0535	23069	23069	MS2	20/54	R_Col_0_2.raw
	VLDALFPSVLGGTcAIPGAFGcGK	O23654	1	1	CID	C14(Carbamidomethyl) C22(Carbamidomethyl)	42.9737	3.72618	1	1	1.04517e+06	2	1204.1	2407.19	-8.56857	91.7069	33094	33094	MS2	23/69	R_Col_0_2.raw
	LLREDYLAQNAFTPYDK	O23654	1	1	CID		22.1488	3.70844	1	1	613163	2	1029.26	2057.52	236.708	53.8084	18261	18261	MS2	24/48	R_Col_0_2.raw
	FEDPAEGEDTLVEK	O23654	1	1	CID		55.1023	3.63605	1	1	4.35179e+06	2	790.426	1579.85	713.973	39.8282	12749	12749	MS2	25/39	R_Col_0_2.raw
	YSNSDAVVYVGcGER	O23654	1	1	CID	C12(Carbamidomethyl)	38.1356	3.56447	1	1	4.62507e+06	2	838.344	1675.68	-34.5535	32.1394	9706	9706	MS2	18/42	R_Col_0_2.raw
	EDDLNEIVQLVGK	O23654	1	1	CID		9.30966	3.53268	1	1	1.72987e+06	2	736.508	1472.01	166.893	75.3349	26699	26699	MS2	16/36	R_Col_0_2.raw
	FEDPAEGEDTLVEK	O23654	1	1	CID		61.7739	3.45373	1	1	5.78071e+06	2	789.926	1578.85	81.0384	40.0953	12854	12854	MS2	27/39	R_Col_0_2.raw
	EDDLNEIVQLVGK	O23654	1	1	CID		41.795	3.45277	1	1	1.20611e+06	2	735.842	1470.68	-739.586	75.8434	26897	26897	MS2	18/36	R_Col_0_2.raw
	LYDDLNAGFR	O23654	1	1	CID		39.5075	3.41756	1	1	4642815	2	592.922	1184.84	1066.08	43.6109	14240	14240	MS2	16/27	R_Col_0_2.raw
	VSGPVVVADGMAGAAMYELVR	O23654	1	1	CID		11.9133	3.40416	1	1	98024.7	2	1046.93	2092.85	381.421	113.261	41445	41445	MS2	19/60	R_Col_0_2.raw
	SYTMLQSWPVR	O23654	1	1	CID		37.5152	3.39006	1	1	2529090	2	684.841	1368.67	728.147	57.4012	19676	19676	MS2	17/30	R_Col_0_2.raw
	ISGDVYIPR	O23654	1	1	CID		11.8008	3.38031	1	1	1.5726e+06	2	510.171	1019.33	-213.742	33.469	10233	10233	MS2	17/24	R_Col_0_2.raw
	LAEmPADSGYPAYLAAR	O23654	1	1	CID	M4(Oxidation)	1	3.31623	1	1	1139120	2	906.345	1811.68	-99.6318	45.4616	14972	14972	MS2	16/48	R_Col_0_2.raw
	VGHDNLIGEIIR	O23654	1	1	CID		35.0214	3.268	1	1	1.90221e+06	2	668.424	1335.84	76.5938	47.004	15582	15582	MS2	15/33	R_Col_0_2.raw
	LYDDLNAGFR	O23654	1	1	CID		19.1721	3.2498	1	1	3.36987e+06	2	592.339	1183.67	81.473	44.0266	14405	14405	MS2	16/27	R_Col_0_2.raw
	KVSGPVVVADGMAGAAMYELVR	O23654	1	1	CID		28.4035	3.24876	1	1	898135	2	1110.6	2220.19	17.6043	73.9354	26153	26153	MS2	21/63	R_Col_0_2.raw
	ISGDVYIPR	O23654	1	1	CID		31.23	3.23267	1	1	2643939	2	510.421	1019.83	276.648	33.2347	10139	10139	MS2	18/24	R_Col_0_2.raw
	DMGYNVSMMADSTSR	O23654	1	1	CID		52.5536	3.15409	1	1	1.16181e+06	2	833.427	1665.85	705.527	48.5544	16192	16192	MS2	18/42	R_Col_0_2.raw
P92549	35.31	19	507	55.0108	6.60986	285.634	ATP synthase subunit alpha, mitochondrial OS=Arabidopsis thaliana GN=ATPA PE=1 SV=2 - [ATPAM_ARATH]
	Sequence	Protein Accessions	# Proteins	# Protein Groups	Activation Type	Modifications	Probability	XCorr	Δ Score	Rank	Intensity	Charge	m/z [Da]	MH+ [Da]	ΔM [ppm]	RT [min]	First Scan	Last Scan	MS Order	Ions Matched	Spectrum File	Annotation
	EVAAFAQFGSDLDAATQALLNR	P92549	1	1	CID		106.509	6.86765	1	1	836211	2	1155.27	2309.53	592.713	97.3726	35308	35308	MS2	30/63	R_Col_0_2.raw
	EVAAFAQFGSDLDAATQALLNR	P92549	1	1	CID		103.54	6.31746	1	1	558090	2	1154.6	2308.19	15.3917	97.4257	35329	35329	MS2	29/63	R_Col_0_2.raw
	EVAAFAQFGSDLDAATQALLNR	P92549	1	1	CID		97.1285	5.87776	1	1	469585	2	1154.85	2308.69	231.965	98.8338	35878	35878	MS2	27/63	R_Col_0_2.raw
	EVAAFAQFGSDLDAATQALLNR	P92549	1	1	CID		81.3871	5.71092	1	1	3.00734e+06	3	770.092	2308.26	45.8362	98.185	35624	35624	MS2	39/126	R_Col_0_2.raw
	AILNSVKPELLQALK	P92549	1	1	CID		43.9107	4.26423	1	1	4.23476e+06	2	819.593	1638.18	720.182	60.3303	20828	20828	MS2	19/42	R_Col_0_2.raw
	LTEVLKQPQYAPLPIEK	P92549	1	1	CID		31.1252	4.26143	1	1	816963	2	984.097	1967.19	32.8293	50.0573	16786	16786	MS2	23/48	R_Col_0_2.raw
	NFYANFQVDEIGR	P92549	1	1	CID		71.9567	4.0497	1	1	2.7911e+06	2	787.426	1573.84	699.383	61.3832	21242	21242	MS2	21/36	R_Col_0_2.raw
	DNGMHALIIYDDLSK	P92549	1	1	CID		69.6594	3.86288	1	1	2.62672e+06	2	853.427	1705.85	598.672	61.2031	21171	21171	MS2	20/42	R_Col_0_2.raw
	TTIAIDTILNQK	P92549	1	1	CID		54.6298	3.82367	1	1	8784281	2	665.84	1330.67	-63.2534	57.2183	19604	19604	MS2	21/33	R_Col_0_2.raw
	TTIAIDTILNQK	P92549	1	1	CID		43.5924	3.80535	1	1	5643683	2	666.34	1331.67	687.743	56.9445	19496	19496	MS2	21/33	R_Col_0_2.raw
	ATSESETMYcVYVAIGQK	P92549	1	1	CID	C10(Carbamidomethyl)	13.6729	3.55838	1	1	528764	2	1019.35	2037.69	371.397	64.9668	22643	22643	MS2	15/51	R_Col_0_2.raw
	GIRPAINVGLSVSR	P92549	1	1	CID		16.8577	3.48528	1	1	3.26061e+06	2	720.508	1440.01	805.577	40.0497	12836	12836	MS2	19/39	R_Col_0_2.raw
	VVDAMGVPIDGK	P92549	1	1	CID		48.6015	3.47865	1	1	9341360	2	600.839	1200.67	34.6939	39.0896	12458	12458	MS2	21/33	R_Col_0_2.raw
	VVDAMGVPIDGK	P92549	1	1	CID		38.9476	3.47807	1	1	1.98913e+06	2	600.422	1199.84	-659.834	39.3225	12550	12550	MS2	20/33	R_Col_0_2.raw
	EVAAFAQFGSDLDAATQALLNR	P92549	1	1	CID		41.4166	3.4758	1	1	10494.7	2	1154.6	2308.19	15.3917	133.181	48074	48074	MS2	15/63	R_Col_0_2.raw
	EVAAFAQFGSDLDAATQALLNR	P92549	1	1	CID		45.2197	3.37355	1	1	47546.2	2	1155.27	2309.53	592.713	118.989	43440	43440	MS2	15/63	R_Col_0_2.raw
	VVSVGDGIAQVYGLNEIQAGEMVLFANGVK	P92549	1	1	CID		90.6965	3.23662	1	1	497924	2	1539.44	3077.87	89.7504	97.6166	35403	35403	MS2	19/87	R_Col_0_2.raw
	AAELTNLFESR	P92549	1	1	CID		45.3484	3.20933	1	1	939807	2	625.09	1249.17	-1173.29	53.0224	17950	17950	MS2	20/30	R_Col_0_2.raw
	AAELTNLFESR	P92549	1	1	CID		40.8383	3.14058	1	1	3.96308e+06	2	626.423	1251.84	959.455	52.2825	17660	17660	MS2	18/30	R_Col_0_2.raw
Q39043	31.29	22	668	73.5159	5.21143	272.69	Mediator of RNA polymerase II transcription subunit 37f OS=Arabidopsis thaliana GN=MED37F PE=1 SV=2 - [MD37F_ARATH]
	Sequence	Protein Accessions	# Proteins	# Protein Groups	Activation Type	Modifications	Probability	XCorr	Δ Score	Rank	Intensity	Charge	m/z [Da]	MH+ [Da]	ΔM [ppm]	RT [min]	First Scan	Last Scan	MS Order	Ions Matched	Spectrum File	Annotation
	LKEVEAVcNPIITAVYQR	Q39043;Q9LKR3	2	2	CID	C8(Carbamidomethyl)	129.59	5.31225	1	1	499138	2	1051.51	2102.02	-525.675	56.8826	19473	19473	MS2	28/51	R_Col_0_2.raw
	IINEPTAAAIAYGLDK	O65719;Q39043;P22953;P22954;Q9LKR3;Q9LHA8;Q9S9N1	8	7	CID		84.2489	5.13011	1	1	5.22165e+06	2	830.51	1660.01	71.0558	59.3723	20451	20451	MS2	26/45	R_Col_0_2.raw
	IINEPTAAAIAYGLDKK	O65719;Q39043;P22953;P22954;Q9LKR3;Q9LHA8;Q9S9N1	8	7	CID		123.669	4.88969	1	1	2.91145e+06	2	895.012	1789.02	573.208	49.5855	16599	16599	MS2	25/48	R_Col_0_2.raw
	SGGAPGAGGESSTEEEDESHDEL	Q39043	1	1	CID		111.935	4.88711	1	1	471298	2	1123.85	2246.69	-84.2228	24.7231	6763	6763	MS2	30/66	R_Col_0_2.raw
	DILLLDVAPLTLGIETVGGVMTK	Q39043;Q9LKR3	2	2	CID		72.0194	4.80913	1	1	191371	2	1185.35	2369.69	570.849	110.843	40542	40542	MS2	23/66	R_Col_0_2.raw
	IINEPTAAAIAYGLDK	O65719;Q39043;P22953;P22954;Q9LKR3;Q9LHA8;Q9S9N1	8	7	CID		75.6109	4.71612	1	1	4.01913e+06	2	831.01	1661.01	673.067	59.1415	20361	20361	MS2	27/45	R_Col_0_2.raw
	DILLLDVAPLTLGIETVGGVMTK	Q39043;Q9LKR3	2	2	CID		85.2647	4.66438	1	1	191364	3	790.426	2369.26	389.573	110.587	40446	40446	MS2	33/132	R_Col_0_2.raw
	EVEAVcNPIITAVYQR	Q39043;Q9LKR3	2	2	CID	C6(Carbamidomethyl)	110.33	4.52519	1	1	1.90915e+06	2	931.429	1861.85	-52.2347	64.1968	22341	22341	MS2	23/45	R_Col_0_2.raw
	IKDAVVTVPAYFNDAQR	Q39043;Q9LKR3	2	2	CID		67.676	4.39216	1	1	7529525	3	636.423	1907.25	132.518	48.2138	16058	16058	MS2	33/96	R_Col_0_2.raw
	EALEWLDENQNSEKEEYDEK	Q39043;Q9LKR3	2	2	CID		37.6814	4.37896	1	1	711246	2	1250.1	2499.2	444.9	45.6956	15064	15064	MS2	16/57	R_Col_0_2.raw
	VFSPEEISAMILTK	Q39043;Q9LKR3	2	2	CID		4.35012	4.28651	1	1	1.08682e+06	3	522.338	1565	108.087	82.7705	29608	29608	MS2	32/78	R_Col_0_2.raw
	DILLLDVAPLTLGIETVGGVMTK	Q39043;Q9LKR3	2	2	CID		45.4437	4.26474	1	1	107261	2	1184.6	2368.19	-62.1962	111.111	40644	40644	MS2	26/66	R_Col_0_2.raw
	LGSVIGIDLGTTYScVGVYK	Q39043;Q9LKR3	2	2	CID	C15(Carbamidomethyl)	60.1789	4.25715	1	1	1.05956e+06	2	1052.01	2103.02	445.986	75.5259	26774	26774	MS2	23/57	R_Col_0_2.raw
	NGHVEIIANDQGNR	Q39043;Q9LKR3	2	2	CID		29.7375	4.17539	1	1	36812.7	3	512.837	1536.5	-165.06	16.0372	3530	3530	MS2	31/78	R_Col_0_2.raw
	IINEPTAAAIAYGLDKK	O65719;Q39043;P22953;P22954;Q9LKR3;Q9LHA8;Q9S9N1	8	7	CID		92.1325	4.09602	1	1	768235	2	894.011	1787.02	-545.356	49.6154	16612	16612	MS2	22/48	R_Col_0_2.raw
	LKEVEAVcNPIITAVYQR	Q39043;Q9LKR3	2	2	CID	C8(Carbamidomethyl)	77.7153	4.01655	1	1	500194	2	1051.43	2101.86	-605.014	58.437	20086	20086	MS2	19/51	R_Col_0_2.raw
	SQIDEIVLVGGSTR	Q39043;Q9LKR3	2	2	CID		29.1636	3.74255	1	1	2453940	2	737.508	1474.01	148.456	53.7051	18220	18220	MS2	21/39	R_Col_0_2.raw
	VEIESLFDGVDLSEPLTR	Q39043	1	1	CID		76.6557	3.6902	1	1	1.21161e+06	2	1009.6	2018.19	-416.88	87.7754	31560	31560	MS2	20/51	R_Col_0_2.raw
	IKDAVVTVPAYFNDAQR	Q39043;Q9LKR3	2	2	CID		18.4942	3.62667	1	1	1300058	2	954.096	1907.18	95.6755	47.8605	15921	15921	MS2	15/48	R_Col_0_2.raw
	VFSPEEISAMILTK	Q39043;Q9LKR3	2	2	CID		30.4535	3.39355	1	1	2.18484e+06	2	783.093	1565.18	222.905	84.0818	30119	30119	MS2	21/39	R_Col_0_2.raw
	NALETYVYNMK	Q39043;Q9LKR3	2	2	CID		34.769	3.37704	1	1	8834941	2	673.424	1345.84	144.743	50.3145	16886	16886	MS2	19/30	R_Col_0_2.raw
	SQIDEIVLVGGSTR	Q39043;Q9LKR3	2	2	CID		35.7067	3.29945	1	1	4.01868e+06	2	737.425	1473.84	35.3879	52.3294	17678	17678	MS2	19/39	R_Col_0_2.raw
O65719	30.35	22	649	71.1032	5.07178	260.461	Heat shock 70 kDa protein 3 OS=Arabidopsis thaliana GN=HSP70-3 PE=1 SV=1 - [HSP7C_ARATH]
	Sequence	Protein Accessions	# Proteins	# Protein Groups	Activation Type	Modifications	Probability	XCorr	Δ Score	Rank	Intensity	Charge	m/z [Da]	MH+ [Da]	ΔM [ppm]	RT [min]	First Scan	Last Scan	MS Order	Ions Matched	Spectrum File	Annotation
	SINPDEAVAYGAAVQAAILSGEGNEK	O65719;P22954;Q9LHA8	4	3	CID		80.2085	5.90642	1	1	1467633	2	1288.02	2575.03	296.156	85.7858	30785	30785	MS2	26/75	R_Col_0_2.raw
	IINEPTAAAIAYGLDK	O65719;Q39043;P22953;P22954;Q9LKR3;Q9LHA8;Q9S9N1	8	7	CID		84.2489	5.13011	1	1	5.22165e+06	2	830.51	1660.01	71.0558	59.3723	20451	20451	MS2	26/45	R_Col_0_2.raw
	ATAGDTHLGGEDFDNR	O65719;P22953;P22954;Q9LHA8;Q9S9N1	6	5	CID		53.6605	5.01199	1	1	1.24463e+06	2	838.844	1676.68	566.287	21.8919	5636	5636	MS2	28/45	R_Col_0_2.raw
	SINPDEAVAYGAAVQAAILSGEGNEK	O65719;P22954;Q9LHA8	4	3	CID		45.2305	4.95201	1	1	1.22652e+06	3	859.011	2575.02	291.086	85.7324	30764	30764	MS2	34/150	R_Col_0_2.raw
	IINEPTAAAIAYGLDKK	O65719;Q39043;P22953;P22954;Q9LKR3;Q9LHA8;Q9S9N1	8	7	CID		123.669	4.88969	1	1	2.91145e+06	2	895.012	1789.02	573.208	49.5855	16599	16599	MS2	25/48	R_Col_0_2.raw
	DAGVIAGLNVMR	O65719;P22953	2	2	CID		46.4318	4.84083	1	1	4468123	2	608.839	1216.67	838.218	57.7197	19802	19802	MS2	22/33	R_Col_0_2.raw
	IINEPTAAAIAYGLDK	O65719;Q39043;P22953;P22954;Q9LKR3;Q9LHA8;Q9S9N1	8	7	CID		75.6109	4.71612	1	1	4.01913e+06	2	831.01	1661.01	673.067	59.1415	20361	20361	MS2	27/45	R_Col_0_2.raw
	DAGVIAGLNVMR	O65719;P22953	2	2	CID		44.9369	4.63066	1	1	3.09966e+06	2	608.423	1215.84	153.381	57.8132	19839	19839	MS2	24/33	R_Col_0_2.raw
	MYQGGEAGGPAAGGMDEDVPPSAGGAGPK	O65719	1	1	CID		61.0792	4.33939	1	1	881613	2	1316.6	2632.2	400.252	37.8046	11949	11949	MS2	29/84	R_Col_0_2.raw
	EQVFSTYSDNQPGVLIQVYEGER	O65719;P22953	2	2	CID		36.3131	4.25681	1	1	968295	2	1329.6	2658.2	-25.9851	74.6456	26428	26428	MS2	18/66	R_Col_0_2.raw
	IINEPTAAAIAYGLDKK	O65719;Q39043;P22953;P22954;Q9LKR3;Q9LHA8;Q9S9N1	8	7	CID		92.1325	4.09602	1	1	768235	2	894.011	1787.02	-545.356	49.6154	16612	16612	MS2	22/48	R_Col_0_2.raw
	VQQLLVDFFNGK	O65719	1	1	CID		31.4785	3.77934	1	1	2.69962e+06	2	704.424	1407.84	55.8015	74.5509	26391	26391	MS2	19/33	R_Col_0_2.raw
	ELESIcNPIIAK	O65719;P22953	2	2	CID	C6(Carbamidomethyl)	6.14438	3.74984	1	1	4.73358e+06	2	694.424	1387.84	800.898	47.4376	15752	15752	MS2	21/33	R_Col_0_2.raw
	SGPAEKPMIVVNYK	O65719	1	1	CID		1.44142	3.74075	1	1	2.40756e+06	2	767.342	1533.68	562.874	30.2794	8971	8971	MS2	18/39	R_Col_0_2.raw
	EQVFSTYSDNQPGVLIQVYEGER	O65719;P22953	2	2	CID		48.9245	3.56818	1	1	1.13001e+06	2	1329.69	2658.37	36.7129	73.2259	25876	25876	MS2	22/66	R_Col_0_2.raw
	NALENYAYNMR	O65719;P22953;P22954;Q9LHA8	4	4	CID		48.6147	3.47981	1	1	19917168	2	679.924	1358.84	165.547	40.9153	13178	13178	MS2	20/30	R_Col_0_2.raw
	DAGVIAGLNVMR	O65719;P22953	2	2	CID		59.2699	3.41321	1	1	688145	2	607.839	1214.67	-806.97	57.9776	19904	19904	MS2	21/33	R_Col_0_2.raw
	MVNHFVQEFK	O65719;P22953;P22954;Q9LHA8	5	4	CID		37.601	3.35278	1	1	8356746	2	640.34	1279.67	814.696	29.3605	8606	8606	MS2	22/27	R_Col_0_2.raw
	MKELESIcNPIIAK	O65719;P22953	2	2	CID	C8(Carbamidomethyl)	22.4147	3.26685	1	1	1.14678e+06	2	823.427	1645.85	-11.5205	41.8054	13530	13530	MS2	16/39	R_Col_0_2.raw
	TTPSYVAFTDSER	O65719;P22953;P22954;Q9LHA8	5	4	CID		46.5736	3.25806	1	1	7524455	2	737.925	1474.84	784.718	37.5514	11847	11847	MS2	19/36	R_Col_0_2.raw
	MVNHFVQEFK	O65719;P22953;P22954;Q9LHA8	5	4	CID		29.9	3.2108	1	1	9270648	2	639.84	1278.67	33.2569	29.5402	8678	8678	MS2	21/27	R_Col_0_2.raw
	NALENYAYNMR	O65719;P22953;P22954;Q9LHA8	4	4	CID		30.4686	3.20822	1	1	5344561	2	680.424	1359.84	900.82	40.368	12962	12962	MS2	17/30	R_Col_0_2.raw
Q9LKR3	31.39	22	669	73.584	5.17334	259.145	Mediator of RNA polymerase II transcription subunit 37a OS=Arabidopsis thaliana GN=MED37A PE=1 SV=1 - [MD37A_ARATH]
	Sequence	Protein Accessions	# Proteins	# Protein Groups	Activation Type	Modifications	Probability	XCorr	Δ Score	Rank	Intensity	Charge	m/z [Da]	MH+ [Da]	ΔM [ppm]	RT [min]	First Scan	Last Scan	MS Order	Ions Matched	Spectrum File	Annotation
	SGGAPGGAGGESSTEEEDESHDEL	Q9LKR3	1	1	CID		129.746	6.3136	1	1	347452	2	1153.02	2305.03	487.53	24.5108	6677	6677	MS2	29/69	R_Col_0_2.raw
	LKEVEAVcNPIITAVYQR	Q39043;Q9LKR3	2	2	CID	C8(Carbamidomethyl)	129.59	5.31225	1	1	499138	2	1051.51	2102.02	-525.675	56.8826	19473	19473	MS2	28/51	R_Col_0_2.raw
	IINEPTAAAIAYGLDK	O65719;Q39043;P22953;P22954;Q9LKR3;Q9LHA8;Q9S9N1	8	7	CID		84.2489	5.13011	1	1	5.22165e+06	2	830.51	1660.01	71.0558	59.3723	20451	20451	MS2	26/45	R_Col_0_2.raw
	IINEPTAAAIAYGLDKK	O65719;Q39043;P22953;P22954;Q9LKR3;Q9LHA8;Q9S9N1	8	7	CID		123.669	4.88969	1	1	2.91145e+06	2	895.012	1789.02	573.208	49.5855	16599	16599	MS2	25/48	R_Col_0_2.raw
	DILLLDVAPLTLGIETVGGVMTK	Q39043;Q9LKR3	2	2	CID		72.0194	4.80913	1	1	191371	2	1185.35	2369.69	570.849	110.843	40542	40542	MS2	23/66	R_Col_0_2.raw
	IINEPTAAAIAYGLDK	O65719;Q39043;P22953;P22954;Q9LKR3;Q9LHA8;Q9S9N1	8	7	CID		75.6109	4.71612	1	1	4.01913e+06	2	831.01	1661.01	673.067	59.1415	20361	20361	MS2	27/45	R_Col_0_2.raw
	VEIESLFDGVDFSEPLTR	Q9LKR3	3	1	CID		82.4618	4.66824	1	1	2.71224e+06	2	1027.43	2053.85	409.798	89.0598	32060	32060	MS2	24/51	R_Col_0_2.raw
	DILLLDVAPLTLGIETVGGVMTK	Q39043;Q9LKR3	2	2	CID		85.2647	4.66438	1	1	191364	3	790.426	2369.26	389.573	110.587	40446	40446	MS2	33/132	R_Col_0_2.raw
	EVEAVcNPIITAVYQR	Q39043;Q9LKR3	2	2	CID	C6(Carbamidomethyl)	110.33	4.52519	1	1	1.90915e+06	2	931.429	1861.85	-52.2347	64.1968	22341	22341	MS2	23/45	R_Col_0_2.raw
	IKDAVVTVPAYFNDAQR	Q39043;Q9LKR3	2	2	CID		67.676	4.39216	1	1	7529525	3	636.423	1907.25	132.518	48.2138	16058	16058	MS2	33/96	R_Col_0_2.raw
	EALEWLDENQNSEKEEYDEK	Q39043;Q9LKR3	2	2	CID		37.6814	4.37896	1	1	711246	2	1250.1	2499.2	444.9	45.6956	15064	15064	MS2	16/57	R_Col_0_2.raw
	VFSPEEISAMILTK	Q39043;Q9LKR3	2	2	CID		4.35012	4.28651	1	1	1.08682e+06	3	522.338	1565	108.087	82.7705	29608	29608	MS2	32/78	R_Col_0_2.raw
	DILLLDVAPLTLGIETVGGVMTK	Q39043;Q9LKR3	2	2	CID		45.4437	4.26474	1	1	107261	2	1184.6	2368.19	-62.1962	111.111	40644	40644	MS2	26/66	R_Col_0_2.raw
	LGSVIGIDLGTTYScVGVYK	Q39043;Q9LKR3	2	2	CID	C15(Carbamidomethyl)	60.1789	4.25715	1	1	1.05956e+06	2	1052.01	2103.02	445.986	75.5259	26774	26774	MS2	23/57	R_Col_0_2.raw
	NGHVEIIANDQGNR	Q39043;Q9LKR3	2	2	CID		29.7375	4.17539	1	1	36812.7	3	512.837	1536.5	-165.06	16.0372	3530	3530	MS2	31/78	R_Col_0_2.raw
	IINEPTAAAIAYGLDKK	O65719;Q39043;P22953;P22954;Q9LKR3;Q9LHA8;Q9S9N1	8	7	CID		92.1325	4.09602	1	1	768235	2	894.011	1787.02	-545.356	49.6154	16612	16612	MS2	22/48	R_Col_0_2.raw
	LKEVEAVcNPIITAVYQR	Q39043;Q9LKR3	2	2	CID	C8(Carbamidomethyl)	77.7153	4.01655	1	1	500194	2	1051.43	2101.86	-605.014	58.437	20086	20086	MS2	19/51	R_Col_0_2.raw
	SQIDEIVLVGGSTR	Q39043;Q9LKR3	2	2	CID		29.1636	3.74255	1	1	2453940	2	737.508	1474.01	148.456	53.7051	18220	18220	MS2	21/39	R_Col_0_2.raw
	IKDAVVTVPAYFNDAQR	Q39043;Q9LKR3	2	2	CID		18.4942	3.62667	1	1	1300058	2	954.096	1907.18	95.6755	47.8605	15921	15921	MS2	15/48	R_Col_0_2.raw
	VFSPEEISAMILTK	Q39043;Q9LKR3	2	2	CID		30.4535	3.39355	1	1	2.18484e+06	2	783.093	1565.18	222.905	84.0818	30119	30119	MS2	21/39	R_Col_0_2.raw
	NALETYVYNMK	Q39043;Q9LKR3	2	2	CID		34.769	3.37704	1	1	8834941	2	673.424	1345.84	144.743	50.3145	16886	16886	MS2	19/30	R_Col_0_2.raw
	SQIDEIVLVGGSTR	Q39043;Q9LKR3	2	2	CID		35.7067	3.29945	1	1	4.01868e+06	2	737.425	1473.84	35.3879	52.3294	17678	17678	MS2	19/39	R_Col_0_2.raw
P55737	29.33	24	699	80.0139	5.04639	258.784	Heat shock protein 90-2 OS=Arabidopsis thaliana GN=HSP90-2 PE=1 SV=1 - [HS902_ARATH]
	Sequence	Protein Accessions	# Proteins	# Protein Groups	Activation Type	Modifications	Probability	XCorr	Δ Score	Rank	Intensity	Charge	m/z [Da]	MH+ [Da]	ΔM [ppm]	RT [min]	First Scan	Last Scan	MS Order	Ions Matched	Spectrum File	Annotation
	VVDSPccLVTGEYGWTANMER	P55737;O03986	3	2	CID	C6(Carbamidomethyl) C7(Carbamidomethyl)	104.178	5.36221	1	1	463520	2	1222.43	2443.86	-84.4157	67.4024	23596	23596	MS2	25/60	R_Col_0_2.raw
	GIEVLYMVDAIDEYAIGQLK	P55737	2	1	CID		300	5.35849	1	1	339377	3	747.759	2241.26	495.001	105.736	38578	38578	MS2	41/114	R_Col_0_2.raw
	LDGQPELFIHIIPDKTNNTLTIIDSGIGMTK	P55737;O03986	3	2	CID		92.9559	5.32677	1	1	1.06289e+06	3	1132.77	3396.28	438.99	83.7241	29980	29980	MS2	33/180	R_Col_0_2.raw
	GIEVLYMVDAIDEYAIGQLK	P55737	2	1	CID		69.7724	5.22062	1	1	486462	2	1121.02	2241.02	389.322	105.644	38542	38542	MS2	26/57	R_Col_0_2.raw
	VVDSPccLVTGEYGWTANMER	P55737;O03986	3	2	CID	C6(Carbamidomethyl) C7(Carbamidomethyl)	100.731	5.10286	1	1	1.20805e+06	2	1222.93	2444.86	324.648	69.0596	24244	24244	MS2	21/60	R_Col_0_2.raw
	KPEEINKEEYAAFYK	P55737;O03986	3	2	CID		64.2762	5.05455	1	1	1.37782e+06	2	930.012	1859.02	51.0338	28.6616	8329	8329	MS2	24/42	R_Col_0_2.raw
	KPEEINKEEYAAFYK	P55737;O03986	3	2	CID		39.7186	4.56745	1	1	2.11595e+06	2	930.429	1859.85	499.084	28.2365	8160	8160	MS2	25/42	R_Col_0_2.raw
	VFIMDNcEDIIPEYLGFVK	P55737	2	1	CID	C7(Carbamidomethyl)	46.8386	4.4982	1	1	429889	2	1152.18	2303.36	540.735	94.8004	34306	34306	MS2	17/54	R_Col_0_2.raw
	KTMEINPENSIMDELR	P55737;O03986	3	2	CID		65.7987	4.34183	1	1	881382	2	960.596	1920.18	137.858	56.3242	19252	19252	MS2	25/45	R_Col_0_2.raw
	GIVDSEDLPLNISR	P55737;O03986	3	2	CID		57.6076	4.32826	1	1	5.93532e+06	2	765.009	1529.01	790.917	61.2008	21170	21170	MS2	23/39	R_Col_0_2.raw
	HSEFISYPISLWIEK	P55737;O03986	3	2	CID		36.4713	4.11793	1	1	3.14168e+06	2	925.429	1849.85	484.974	75.7	26841	26841	MS2	20/42	R_Col_0_2.raw
	GIEVLYMVDAIDEYAIGQLK	P55737	2	1	CID		35.4684	3.92219	1	1	345681	2	1120.68	2240.36	91.861	106.225	38769	38769	MS2	16/57	R_Col_0_2.raw
	TNNTLTIIDSGIGMTK	P55737;O03986	3	2	CID		66.9924	3.90626	1	1	2.62835e+06	2	840.01	1679.01	86.6706	60.565	20920	20920	MS2	19/45	R_Col_0_2.raw
	VIKDVLGDKVEK	P55737;O03986	3	2	CID		30.7956	3.87535	1	1	313800	3	448.336	1342.99	148.871	20.3633	5042	5042	MS2	28/66	R_Col_0_2.raw
	SGDELTSLKDYVTR	P55737;O03986	3	2	CID		19.3274	3.84657	1	1	2.71291e+06	2	793.01	1585.01	770.084	49.1284	16419	16419	MS2	18/39	R_Col_0_2.raw
	LDGQPELFIHIIPDKTNNTLTIIDSGIGMTK	P55737;O03986	3	2	CID		97.6363	3.81689	1	1	936707	3	1132.18	3394.53	-76.328	83.7775	30001	30001	MS2	30/180	R_Col_0_2.raw
	KGIEVLYMVDAIDEYAIGQLK	P55737	2	1	CID		45.827	3.79249	1	1	773872	2	1184.77	2368.53	118.207	96.0738	34801	34801	MS2	18/60	R_Col_0_2.raw
	ADLVNNLGTIAR	P55737;O03986	4	2	CID		41.8605	3.74331	1	1	11954049	2	628.923	1256.84	113.769	46.4301	15356	15356	MS2	20/33	R_Col_0_2.raw
	ELISNSSDALDKIR	P55737;O03986	4	2	CID		38.5585	3.59925	1	1	2126232	2	780.926	1560.84	13.9725	38.6438	12282	12282	MS2	18/39	R_Col_0_2.raw
	TMEINPENSIMDELRK	P55737;O03986	3	2	CID		26.614	3.33002	1	1	1.01193e+06	2	960.513	1920.02	51.0633	59.7681	20608	20608	MS2	18/45	R_Col_0_2.raw
	TMEINPENSIMDELRK	P55737;O03986	3	2	CID		28.7957	3.28305	1	1	582277	2	960.763	1920.52	311.401	59.5734	20531	20531	MS2	17/45	R_Col_0_2.raw
	ELISNSSDALDK	P55737;O03986	4	2	CID		30.9152	3.21298	1	1	2.45452e+06	2	646.423	1291.84	156.208	27.5594	7889	7889	MS2	18/33	R_Col_0_2.raw
	KGIEVLYMVDAIDEYAIGQLK	P55737	2	1	CID		1.68641	3.19304	1	1	443906	2	1184.18	2367.36	-374.557	96.3603	34913	34913	MS2	17/60	R_Col_0_2.raw
	TMEINPENSIMDELR	P55737;O03986	3	2	CID		46.0372	3.1616	1	1	825663	2	896.012	1791.02	-451.968	69.1026	24261	24261	MS2	16/42	R_Col_0_2.raw
Q9SAJ4	47.63	25	401	42.1054	5.68115	257.685	Phosphoglycerate kinase 3, cytosolic OS=Arabidopsis thaliana GN=PGK3 PE=1 SV=1 - [PGKY3_ARATH]
	Sequence	Protein Accessions	# Proteins	# Protein Groups	Activation Type	Modifications	Probability	XCorr	Δ Score	Rank	Intensity	Charge	m/z [Da]	MH+ [Da]	ΔM [ppm]	RT [min]	First Scan	Last Scan	MS Order	Ions Matched	Spectrum File	Annotation
	FLKPSVAGFLMQK	Q9SAJ4	1	1	CID		49.268	5.47297	1	1	2.3235e+06	3	489.587	1466.75	629.145	54.5331	18545	18545	MS2	33/72	R_Col_0_2.raw
	LSELLGVEVVMANDSIGEEVQK	Q9SAJ4	1	1	CID		73.4292	5.10039	1	1	791735	2	1180.43	2359.86	277.077	83.6475	29950	29950	MS2	24/63	R_Col_0_2.raw
	LVAGLPEGGVLLLENVR	Q9SAJ4	1	1	CID		97.7065	5.0461	1	1	11344254	2	875.094	1749.18	88.4042	81.7748	29216	29216	MS2	28/48	R_Col_0_2.raw
	FLKPSVAGFLMQK	Q9SAJ4	1	1	CID		39.2041	4.64025	1	1	835277	3	488.837	1464.5	-906.283	54.7275	18623	18623	MS2	36/72	R_Col_0_2.raw
	TIIWNGPMGVFEFDK	Q9SAJ4	2	1	CID		57.1855	4.41761	1	1	2.68267e+06	2	877.845	1754.68	467.231	86.0551	30890	30890	MS2	23/42	R_Col_0_2.raw
	AQGLSVGSSLVEEDKLDLAK	Q9SAJ4	2	1	CID		11.5345	4.40296	1	1	22636.3	2	1030.35	2059.69	289.263	121.734	44339	44339	MS2	21/57	R_Col_0_2.raw
	FYAEEEKNDPEFAKK	Q9SAJ4	1	1	CID		43.4822	4.21192	1	1	103092	2	923.262	1845.52	350.38	20.0234	4912	4912	MS2	18/42	R_Col_0_2.raw
	LAALADVYVNDAFGTAHR	Q9SAJ4	1	1	CID		43.6807	4.11771	1	1	1.04401e+06	2	952.513	1904.02	27.202	60.9814	21084	21084	MS2	20/51	R_Col_0_2.raw
	ELDYLVGAVANPK	Q9SAJ4	2	1	CID		46.7256	4.10108	1	1	4288349	2	695.008	1389.01	191.455	53.9308	18309	18309	MS2	23/36	R_Col_0_2.raw
	GVTTIIGGGDSVAAVEK	Q9SAJ4;Q9LD57;P50318	4	3	CID		26.3036	4.04357	1	1	3553173	2	787.426	1573.84	1.04226	46.5721	15412	15412	MS2	24/48	R_Col_0_2.raw
	GVSLLLPTDVVIADKFAPDANSK	Q9SAJ4;P50318	3	2	CID		39.6763	3.90426	1	1	518120	2	1186.18	2371.36	450.672	79.0698	28159	28159	MS2	21/66	R_Col_0_2.raw
	AQGLSVGSSLVEEDKLDLAK	Q9SAJ4	2	1	CID		70.014	3.8803	1	1	34417.6	2	1030.51	2060.02	451.03	117.111	42820	42820	MS2	20/57	R_Col_0_2.raw
	GVTTIIGGGDSVAAVEK	Q9SAJ4;Q9LD57;P50318	4	3	CID		1	3.78934	1	1	43828.1	2	787.843	1574.68	530.261	115.805	42367	42367	MS2	15/48	R_Col_0_2.raw
	LAALADVYVNDAFGTAHR	Q9SAJ4	1	1	CID		32.3869	3.76141	1	1	5039299	3	635.423	1904.25	151.628	61.0195	21099	21099	MS2	32/102	R_Col_0_2.raw
	VDLNVPLDDNSNITDDTR	Q9SAJ4	1	1	CID		106.213	3.69367	1	1	1663363	2	1008.43	2015.85	-48.739	56.3529	19263	19263	MS2	23/51	R_Col_0_2.raw
	TIIWNGPMGVFEFDK	Q9SAJ4	2	1	CID		63.6006	3.69097	1	1	943596	2	877.511	1754.02	87.3207	86.1475	30926	30926	MS2	21/42	R_Col_0_2.raw
	GVSLLLPTDVVIADK	Q9SAJ4;P50318	3	2	CID		9.2565	3.62576	1	1	3.42582e+06	2	770.592	1540.18	180.676	75.7904	26876	26876	MS2	20/42	R_Col_0_2.raw
	GVTTIIGGGDSVAAVEK	Q9SAJ4;Q9LD57;P50318	4	3	CID		4.31034	3.48928		2	2.10325e+06	2	787.509	1574.01	106.931	47.9444	15953	15953	MS2	19/48	R_Col_0_2.raw
	ELDYLVGAVANPK	Q9SAJ4	2	1	CID		54.9084	3.47406	1	1	1.47333e+06	2	694.424	1387.84	-649.035	54.2099	18419	18419	MS2	23/36	R_Col_0_2.raw
	ELDYLVGAVANPK	Q9SAJ4	2	1	CID		9.39751	3.38121	1	1	6.68546e+06	2	695.591	1390.17	1030.53	53.9286	18308	18308	MS2	20/36	R_Col_0_2.raw
	GVSLLLPTDVVIADKFAPDANSK	Q9SAJ4;P50318	3	2	CID		19.1172	3.35706	1	1	1.05987e+06	2	1186.35	2371.69	591.158	77.4766	27537	27537	MS2	18/66	R_Col_0_2.raw
	AQGLSVGSSLVEEDKLDLAK	Q9SAJ4	2	1	CID		1	3.14751	1	1	125804	2	1030.43	2059.85	370.153	111.575	40820	40820	MS2	13/57	R_Col_0_2.raw
	ELDYLVGAVANPK	Q9SAJ4	2	1	CID		19.8954	3.13479	1	1	1.14727e+06	2	695.341	1389.67	671.101	55.5792	18958	18958	MS2	15/36	R_Col_0_2.raw
	GVTTIIGGGDSVAAVEK	Q9SAJ4;Q9LD57;P50318	4	3	CID		1.67725	3.13152	1	1	22133	2	788.093	1575.18	847.523	125.933	45710	45710	MS2	14/48	R_Col_0_2.raw
	ELDYLVGAVANPK	Q9SAJ4	2	1	CID		67.3677	3.10874	1	1	648497	1	1388.77	1388.77	20.8724	53.8716	18287	18287	MS2	19/36	R_Col_0_2.raw
O23255	43.71	24	485	53.3441	5.97314	253.722	Adenosylhomocysteinase 1 OS=Arabidopsis thaliana GN=SAHH1 PE=1 SV=1 - [SAHH1_ARATH]
	Sequence	Protein Accessions	# Proteins	# Protein Groups	Activation Type	Modifications	Probability	XCorr	Δ Score	Rank	Intensity	Charge	m/z [Da]	MH+ [Da]	ΔM [ppm]	RT [min]	First Scan	Last Scan	MS Order	Ions Matched	Spectrum File	Annotation
	NNAIVcNIGHFDNEIDMLGLETYPGVKR	O23255;Q9LK36	2	2	CID	C6(Carbamidomethyl)	86.0593	5.40997	1	1	967574	3	1064.26	3190.78	386.76	76.3049	27078	27078	MS2	28/162	R_Col_0_2.raw
	WcScNIFSTQDHAAAAIAR	O23255;Q9LK36	2	2	CID	C2(Carbamidomethyl) C4(Carbamidomethyl)	77.8979	5.34878	1	1	983785	2	1089.93	2178.86	-57.0234	48.4622	16156	16156	MS2	26/54	R_Col_0_2.raw
	LELELAEVEMPGLMAcR	O23255	1	1	CID	C16(Carbamidomethyl)	102.952	4.69837	1	1	9241516	2	981.513	1962.02	542.753	83.938	30062	30062	MS2	25/48	R_Col_0_2.raw
	TGQVPDPTSTDNPEFQIVLSIIK	O23255	1	1	CID		72.1312	4.66866	1	1	3.42095e+06	2	1250.6	2500.2	359.308	95.2304	34472	34472	MS2	26/66	R_Col_0_2.raw
	LMNLGcATGHPSFVMScSFTNQVIAQLELWNEK	O23255;Q9LK36	2	2	CID	C6(Carbamidomethyl) C17(Carbamidomethyl)	34.1052	4.44817	1	1	681971	3	1261.94	3783.79	267.28	95.9834	34766	34766	MS2	33/192	R_Col_0_2.raw
	TGQVPDPTSTDNPEFQIVLSIIK	O23255	1	1	CID		24.1895	4.43381	1	1	478355	2	1250.85	2500.7	559.184	96.6534	35028	35028	MS2	22/66	R_Col_0_2.raw
[truncated: 4,877 more rows]

## Sheet: Col0_3
Accession	Coverage	# Peptides	# AAs	MW [kDa]	calc. pI	Score	Description
[truncated: 7,065 more rows]

## Sheet: Col0-4
Accession	Coverage	# Peptides	# AAs	MW [kDa]	calc. pI	Score	Description
[truncated: 859 more rows]

[truncated: 8 more sheets: plda1-1_1, plda1-1_2, plda1-1_3, plda1-1_4, plda1-2_1, plda1-2_2, plda1-2_3, plda1-2_4]
